# Supplementary material for: Transcriptional reprogramming strategies and miRNA-mediated regulation networks of Taxus media induced into callus cells from tissues
Source: BMC Genomics. 2020 Feb 18;21:168. doi: 10.1186/s12864-020-6576-2 (PMC7029464; doi:10.1186/s12864-020-6576-2)
Supplement: Supplementary file 4 — Additional file 4. All expressed miRNAs All expressed miRNAs were listed in sheet (a) including known and novel miRNAs. The sheet (footnotes) provided the information about the table. [file 12864_2020_6576_MOESM4_ESM.xlsx]

## Sheet: (a) Statistics
GO enrichment values
GO_ID	GO_Term	GO_Function	GO_Level	Specific signifcant DEGs NO.	Total Significant gene NO.	Specific gene NO.	Total gene NO.	pvalue (Fisher's Exact test)	up	down	Ratio(DOWN/UP)
GO:0019318	hexose metabolic process	biological_process	8	6	6654	6	26712	0.000238519	6	0	UP
GO:0016168	chlorophyll binding	molecular_function	6	21	6654	42	26712	0.000394069	0	21	DOWN
GO:0000038	very long-chain fatty acid metabolic process	biological_process	10	14	6654	25	26712	0.000876149	0	14	DOWN
GO:0009654	photosystem II oxygen evolving complex	cellular_component	10	12	6654	20	26712	0.000899353	0	12	DOWN
GO:0048439	flower morphogenesis	biological_process	5	5	6654	5	26712	0.000958058	0	5	DOWN
GO:0010582	floral meristem determinacy	biological_process	5	7	6654	9	26712	0.00130943	0	7	DOWN
GO:0010277	chlorophyllide a oxygenase [overall] activity	molecular_function	7	6	6654	7	26712	0.00131338	0	6	DOWN
GO:0031209	SCAR complex	cellular_component	9	6	6654	7	26712	0.00131338	0	6	DOWN
GO:0050829	defense response to Gram-negative bacterium	biological_process	8	10	6654	16	26712	0.00159101	0	10	DOWN
GO:0042335	cuticle development	biological_process	6	15	6654	29	26712	0.00170623	0	15	DOWN
GO:0009773	photosynthetic electron transport in photosystem I	biological_process	8	9	6654	14	26712	0.00209054	0	9	DOWN
GO:0009956	radial pattern formation	biological_process	8	8	6654	12	26712	0.00270752	0	8	DOWN
GO:0010310	regulation of hydrogen peroxide metabolic process	biological_process	7	7	6654	10	26712	0.00342269	0	7	DOWN
GO:0009768	photosynthesis, light harvesting in photosystem I	biological_process	7	14	6654	28	26712	0.00363241	0	14	DOWN
GO:1901949	5alpha,9alpha,10beta-labda-8(20),13-dien-15-yl diphosphate biosynthetic process	biological_process	9	4	6654	4	26712	0.00384779	4	0	UP
GO:1901948	5alpha,9alpha,10beta-labda-8(20),13-dien-15-yl diphosphate catabolic process	biological_process	10	4	6654	4	26712	0.00384779	4	0	UP
GO:0010330	cellulose synthase complex	cellular_component	7	4	6654	4	26712	0.00384779	4	0	UP
GO:0050559	copalyl diphosphate synthase activity	molecular_function	6	4	6654	4	26712	0.00384779	4	0	UP
GO:1901946	miltiradiene biosynthetic process	biological_process	8	4	6654	4	26712	0.00384779	4	0	UP
GO:0005871	kinesin complex	cellular_component	12	30	6654	77	26712	0.0044591	0	30	DOWN
GO:0007018	microtubule-based movement	biological_process	6	30	6654	77	26712	0.0044591	0	30	DOWN
GO:0048826	cotyledon morphogenesis	biological_process	7	5	6654	6	26712	0.00455575	0	5	DOWN
GO:0031409	pigment binding	molecular_function	4	13	6654	26	26712	0.00502164	0	13	DOWN
GO:1900426	positive regulation of defense response to bacterium	biological_process	9	7	6654	11	26712	0.0073907	0	7	DOWN
GO:0045010	actin nucleation	biological_process	12	7	6654	11	26712	0.0073907	0	7	DOWN
GO:0010598	NAD(P)H dehydrogenase complex (plastoquinone)	cellular_component	7	7	6654	11	26712	0.0073907	0	7	DOWN
GO:0009523	photosystem II	cellular_component	10	10	6654	19	26712	0.00864622	0	10	DOWN
GO:0051457	maintenance of protein location in nucleus	biological_process	8	6	6654	9	26712	0.00979776	0	6	DOWN
GO:0010052	guard cell differentiation	biological_process	7	6	6654	9	26712	0.00979776	0	6	DOWN
GO:0006521	regulation of cellular amino acid metabolic process	biological_process	8	5	6654	7	26712	0.0126617	0	5	DOWN
GO:0010618	aerenchyma formation	biological_process	6	5	6654	7	26712	0.0126617	0	5	DOWN
GO:0004144	diacylglycerol O-acyltransferase activity	molecular_function	9	11	6654	23	26712	0.0144215	0	11	DOWN
GO:1902395	regulation of 1-deoxy-D-xylulose-5-phosphate synthase activity	biological_process	7	4	6654	5	26712	0.0154067	4	0	UP
GO:0033843	xyloglucan 6-xylosyltransferase activity	molecular_function	8	4	6654	5	26712	0.0154067	0	4	DOWN
GO:0010322	regulation of isopentenyl diphosphate biosynthetic process, methylerythritol 4-phosphate pathway	biological_process	9	4	6654	5	26712	0.0154067	4	0	UP
GO:0010254	nectary development	biological_process	5	3	6654	3	26712	0.0154519	0	3	DOWN
GO:0010007	magnesium chelatase complex	cellular_component	12	3	6654	3	26712	0.0154519	0	3	DOWN
GO:0080169	cellular response to boron-containing substance deprivation	biological_process	9	3	6654	3	26712	0.0154519	3	0	UP
GO:0010434	bract formation	biological_process	11	3	6654	3	26712	0.0154519	0	3	DOWN
GO:0051020	GTPase binding	molecular_function	6	3	6654	3	26712	0.0154519	0	3	DOWN
GO:0035067	negative regulation of histone acetylation	biological_process	11	3	6654	3	26712	0.0154519	0	3	DOWN
GO:0016985	mannan endo-1,4-beta-mannosidase activity	molecular_function	9	6	6654	10	26712	0.0193604	0	6	DOWN
GO:0046355	mannan catabolic process	biological_process	7	6	6654	10	26712	0.0193604	0	6	DOWN
GO:0019253	reductive pentose-phosphate cycle	biological_process	8	7	6654	13	26712	0.0237956	0	7	DOWN
GO:0080135	regulation of cellular response to stress	biological_process	6	7	6654	13	26712	0.0237956	0	7	DOWN
GO:0008574	ATP-dependent microtubule motor activity, plus-end-directed	molecular_function	11	7	6654	13	26712	0.0237956	0	7	DOWN
GO:0010942	positive regulation of cell death	biological_process	7	5	6654	8	26712	0.0268663	0	5	DOWN
GO:0009969	xyloglucan biosynthetic process	biological_process	9	5	6654	8	26712	0.0268663	0	5	DOWN
GO:0048235	pollen sperm cell differentiation	biological_process	7	6	6654	11	26712	0.033724	0	6	DOWN
GO:0008356	asymmetric cell division	biological_process	6	6	6654	11	26712	0.033724	0	6	DOWN
GO:0010189	vitamin E biosynthetic process	biological_process	8	4	6654	6	26712	0.0371087	0	4	DOWN
GO:0009691	cytokinin biosynthetic process	biological_process	8	4	6654	6	26712	0.0371087	0	4	DOWN
GO:0051259	protein oligomerization	biological_process	8	4	6654	6	26712	0.0371087	4	0	DOWN
GO:0016117	carotenoid biosynthetic process	biological_process	9	8	6654	17	26712	0.0393922	0	8	DOWN
GO:0010025	wax biosynthetic process	biological_process	5	10	6654	23	26712	0.0397879	0	10	DOWN
GO:0003777	microtubule motor activity	molecular_function	10	25	6654	72	26712	0.0400237	0	25	DOWN
GO:0045653	negative regulation of megakaryocyte differentiation	biological_process	10	5	6654	9	26712	0.0482021	0	5	DOWN
GO:0006335	DNA replication-dependent nucleosome assembly	biological_process	13	5	6654	9	26712	0.0482021	0	5	DOWN
GO:0005945	6-phosphofructokinase complex	cellular_component	11	5	6654	9	26712	0.0482021	5	0	UP
GO:0051290	protein heterotetramerization	biological_process	10	5	6654	9	26712	0.0482021	0	5	DOWN
GO:0071395	cellular response to jasmonic acid stimulus	biological_process	7	3	6654	4	26712	0.0502643	0	3	DOWN
GO:0047216	inositol 3-alpha-galactosyltransferase activity	molecular_function	8	3	6654	4	26712	0.0502643	0	3	DOWN
GO:0009772	photosynthetic electron transport in photosystem II	biological_process	8	3	6654	4	26712	0.0502643	0	3	DOWN
GO:0010088	phloem development	biological_process	7	3	6654	4	26712	0.0502643	0	3	DOWN
GO:0016851	magnesium chelatase activity	molecular_function	7	3	6654	4	26712	0.0502643	0	3	DOWN
GO:0051938	L-glutamate import	biological_process	11	3	6654	4	26712	0.0502643	3	0	UP
GO:0043091	L-arginine import	biological_process	9	3	6654	4	26712	0.0502643	3	0	UP
GO:0047787	delta4-3-oxosteroid 5beta-reductase activity	molecular_function	8	6	6654	12	26712	0.0535008	6	0	UP
GO:0047196	long-chain-alcohol O-fatty-acyltransferase activity	molecular_function	8	8	6654	18	26712	0.0558126	0	8	DOWN
GO:0010492	maintenance of shoot apical meristem identity	biological_process	11	8	6654	18	26712	0.0558126	0	8	DOWN
GO:0004558	alpha-1,4-glucosidase activity	molecular_function	9	2	6654	2	26712	0.0620446	2	0	UP
GO:0009496	plastoquinol--plastocyanin reductase activity	molecular_function	7	2	6654	2	26712	0.0620446	0	2	DOWN
GO:0046755	viral budding	biological_process	8	2	6654	2	26712	0.0620446	0	2	DOWN
GO:1900140	regulation of seedling development	biological_process	8	2	6654	2	26712	0.0620446	0	2	DOWN
GO:0010175	sphingosine transmembrane transporter activity	molecular_function	7	2	6654	2	26712	0.0620446	0	2	DOWN
GO:0045806	negative regulation of endocytosis	biological_process	7	2	6654	2	26712	0.0620446	0	2	DOWN
GO:0017126	nucleologenesis	biological_process	7	2	6654	2	26712	0.0620446	2	0	UP
GO:0004794	L-threonine ammonia-lyase activity	molecular_function	7	2	6654	2	26712	0.0620446	2	0	UP
GO:0016151	nickel cation binding	molecular_function	8	2	6654	2	26712	0.0620446	2	0	UP
GO:0004420	hydroxymethylglutaryl-CoA reductase (NADPH) activity	molecular_function	7	2	6654	2	26712	0.0620446	0	2	DOWN
GO:0031436	BRCA1-BARD1 complex	cellular_component	9	2	6654	2	26712	0.0620446	0	2	DOWN
GO:0071709	membrane assembly	biological_process	5	2	6654	2	26712	0.0620446	0	2	DOWN
GO:0044774	mitotic DNA integrity checkpoint	biological_process	11	2	6654	2	26712	0.0620446	0	2	DOWN
GO:2000786	positive regulation of autophagosome assembly	biological_process	10	2	6654	2	26712	0.0620446	0	2	DOWN
GO:0045717	negative regulation of fatty acid biosynthetic process	biological_process	11	2	6654	2	26712	0.0620446	0	2	DOWN
GO:1903508	positive regulation of nucleic acid-templated transcription	biological_process	11	2	6654	2	26712	0.0620446	0	2	DOWN
GO:0000792	heterochromatin	cellular_component	12	2	6654	2	26712	0.0620446	0	2	DOWN
GO:0010400	rhamnogalacturonan I side chain metabolic process	biological_process	8	2	6654	2	26712	0.0620446	2	0	UP
GO:0000994	RNA polymerase III core binding	molecular_function	8	2	6654	2	26712	0.0620446	0	2	DOWN
GO:0048226	Casparian strip	cellular_component	9	2	6654	2	26712	0.0620446	0	2	DOWN
GO:0009512	cytochrome b6f complex	cellular_component	9	2	6654	2	26712	0.0620446	0	2	DOWN
GO:0010338	leaf formation	biological_process	10	2	6654	2	26712	0.0620446	0	2	DOWN
GO:2000306	positive regulation of photomorphogenesis	biological_process	9	2	6654	2	26712	0.0620446	0	2	DOWN
GO:0016119	carotene metabolic process	biological_process	8	2	6654	2	26712	0.0620446	0	2	DOWN
GO:0097295	morphine biosynthetic process	biological_process	8	2	6654	2	26712	0.0620446	2	0	UP
GO:0051749	indole acetic acid carboxyl methyltransferase activity	molecular_function	7	2	6654	2	26712	0.0620446	0	2	DOWN
GO:0060042	retina morphogenesis in camera-type eye	biological_process	12	2	6654	2	26712	0.0620446	0	2	DOWN
GO:0010368	chloroplast isoamylase complex	cellular_component	12	2	6654	2	26712	0.0620446	0	2	DOWN
GO:0070217	transcription factor TFIIIB complex assembly	biological_process	9	2	6654	2	26712	0.0620446	0	2	DOWN
GO:0032454	histone demethylase activity (H3-K9 specific)	molecular_function	6	2	6654	2	26712	0.0620446	0	2	DOWN
GO:0080183	response to photooxidative stress	biological_process	6	2	6654	2	26712	0.0620446	0	2	DOWN
GO:0016480	negative regulation of transcription from RNA polymerase III promoter	biological_process	13	2	6654	2	26712	0.0620446	0	2	DOWN
GO:0097039	protein linear polyubiquitination	biological_process	12	2	6654	2	26712	0.0620446	0	2	DOWN
GO:0002230	positive regulation of defense response to virus by host	biological_process	8	2	6654	2	26712	0.0620446	0	2	DOWN
GO:0042362	fat-soluble vitamin biosynthetic process	biological_process	7	2	6654	2	26712	0.0620446	0	2	DOWN
GO:0070086	ubiquitin-dependent endocytosis	biological_process	5	2	6654	2	26712	0.0620446	0	2	DOWN
GO:0045815	positive regulation of gene expression, epigenetic	biological_process	9	2	6654	2	26712	0.0620446	0	2	DOWN
GO:0010176	homogentisate phytyltransferase activity	molecular_function	8	2	6654	2	26712	0.0620446	0	2	DOWN
GO:0009925	basal plasma membrane	cellular_component	7	2	6654	2	26712	0.0620446	0	2	DOWN
GO:0043010	camera-type eye development	biological_process	10	2	6654	2	26712	0.0620446	0	2	DOWN
GO:0051127	positive regulation of actin nucleation	biological_process	14	2	6654	2	26712	0.0620446	0	2	DOWN
GO:0008987	quinolinate synthetase A activity	molecular_function	4	2	6654	2	26712	0.0620446	2	0	UP
GO:0090610	bundle sheath cell fate specification	biological_process	7	4	6654	7	26712	0.0697046	0	4	DOWN
GO:0042132	fructose 1,6-bisphosphate 1-phosphatase activity	molecular_function	10	4	6654	7	26712	0.0697046	0	4	DOWN
GO:0009685	gibberellin metabolic process	biological_process	8	4	6654	7	26712	0.0697046	4	0	UP
GO:0045727	positive regulation of translation	biological_process	9	4	6654	7	26712	0.0697046	0	4	DOWN
GO:0042127	regulation of cell proliferation	biological_process	5	4	6654	7	26712	0.0697046	0	4	DOWN
GO:0004659	prenyltransferase activity	molecular_function	6	4	6654	7	26712	0.0697046	0	4	DOWN
GO:0016246	RNA interference	biological_process	11	8	6654	19	26712	0.0759926	0	8	DOWN
GO:0010117	photoprotection	biological_process	7	5	6654	10	26712	0.0770438	0	5	DOWN
GO:0010601	positive regulation of auxin biosynthetic process	biological_process	8	5	6654	10	26712	0.0770438	0	5	DOWN
GO:0009538	photosystem I reaction center	cellular_component	11	5	6654	10	26712	0.0770438	0	5	DOWN
GO:0006336	DNA replication-independent nucleosome assembly	biological_process	13	5	6654	10	26712	0.0770438	0	5	DOWN
GO:0033500	carbohydrate homeostasis	biological_process	7	5	6654	10	26712	0.0770438	0	5	DOWN
GO:0009522	photosystem I	cellular_component	10	7	6654	16	26712	0.0781839	0	7	DOWN
GO:0019432	triglyceride biosynthetic process	biological_process	8	10	6654	26	26712	0.0889389	0	10	DOWN
GO:0035252	UDP-xylosyltransferase activity	molecular_function	7	3	6654	5	26712	0.102551	0	3	DOWN
GO:0045995	regulation of embryonic development	biological_process	7	3	6654	5	26712	0.102551	3	0	UP
GO:0030388	fructose 1,6-bisphosphate metabolic process	biological_process	7	3	6654	5	26712	0.102551	0	3	DOWN
GO:0010190	cytochrome b6f complex assembly	biological_process	10	3	6654	5	26712	0.102551	0	3	DOWN
GO:0006021	inositol biosynthetic process	biological_process	7	3	6654	5	26712	0.102551	0	3	DOWN
GO:0048497	maintenance of floral organ identity	biological_process	10	3	6654	5	26712	0.102551	0	3	DOWN
GO:0051861	glycolipid binding	molecular_function	5	3	6654	5	26712	0.102551	0	3	DOWN
GO:0016337	single organismal cell-cell adhesion	biological_process	6	3	6654	5	26712	0.102551	0	3	DOWN
GO:0006567	threonine catabolic process	biological_process	10	3	6654	5	26712	0.102551	0	3	DOWN
GO:0010158	abaxial cell fate specification	biological_process	7	3	6654	5	26712	0.102551	0	3	DOWN
GO:0004512	inositol-3-phosphate synthase activity	molecular_function	6	3	6654	5	26712	0.102551	0	3	DOWN
GO:0019203	carbohydrate phosphatase activity	molecular_function	8	3	6654	5	26712	0.102551	0	3	DOWN
GO:0042735	protein body	cellular_component	9	3	6654	5	26712	0.102551	3	0	UP
GO:0016799	hydrolase activity, hydrolyzing N-glycosyl compounds	molecular_function	6	3	6654	5	26712	0.102551	0	3	DOWN
GO:0017089	glycolipid transporter activity	molecular_function	6	3	6654	5	26712	0.102551	0	3	DOWN
GO:0045597	positive regulation of cell differentiation	biological_process	8	3	6654	5	26712	0.102551	0	3	DOWN
GO:0047560	3-dehydrosphinganine reductase activity	molecular_function	7	3	6654	5	26712	0.102551	0	3	DOWN
GO:0050378	UDP-glucuronate 4-epimerase activity	molecular_function	7	3	6654	5	26712	0.102551	0	3	DOWN
GO:0046836	glycolipid transport	biological_process	6	3	6654	5	26712	0.102551	0	3	DOWN
GO:0006833	water transport	biological_process	6	3	6654	5	26712	0.102551	0	3	DOWN
GO:0008453	alanine-glyoxylate transaminase activity	molecular_function	7	3	6654	5	26712	0.102551	0	3	DOWN
GO:0010207	photosystem II assembly	biological_process	7	7	6654	17	26712	0.105338	0	7	DOWN
GO:0010206	photosystem II repair	biological_process	7	7	6654	17	26712	0.105338	0	7	DOWN
GO:0010048	vernalization response	biological_process	6	4	6654	8	26712	0.112543	0	4	DOWN
GO:0016602	CCAAT-binding factor complex	cellular_component	10	4	6654	8	26712	0.112543	0	4	DOWN
GO:0010417	glucuronoxylan biosynthetic process	biological_process	10	4	6654	8	26712	0.112543	0	4	DOWN
GO:0009767	photosynthetic electron transport chain	biological_process	7	4	6654	8	26712	0.112543	0	4	DOWN
GO:0009862	systemic acquired resistance, salicylic acid mediated signaling pathway	biological_process	8	5	6654	11	26712	0.113144	0	5	DOWN
GO:0007231	osmosensory signaling pathway	biological_process	7	5	6654	11	26712	0.113144	0	5	DOWN
GO:0009115	xanthine catabolic process	biological_process	11	6	6654	15	26712	0.146335	6	0	UP
GO:0016903	oxidoreductase activity, acting on the aldehyde or oxo group of donors	molecular_function	5	6	6654	15	26712	0.146335	6	0	UP
GO:0004854	xanthine dehydrogenase activity	molecular_function	7	6	6654	15	26712	0.146335	6	0	UP
GO:0080005	photosystem stoichiometry adjustment	biological_process	7	2	6654	3	26712	0.15523	0	2	DOWN
GO:0047517	1,4-beta-D-xylan synthase activity	molecular_function	7	2	6654	3	26712	0.15523	0	2	DOWN
GO:0090428	perianth development	biological_process	6	2	6654	3	26712	0.15523	0	2	DOWN
GO:1900057	positive regulation of leaf senescence	biological_process	12	2	6654	3	26712	0.15523	0	2	DOWN
GO:0019305	dTDP-rhamnose biosynthetic process	biological_process	11	2	6654	3	26712	0.15523	0	2	DOWN
GO:0003855	3-dehydroquinate dehydratase activity	molecular_function	7	2	6654	3	26712	0.15523	2	0	UP
GO:0033528	S-methylmethionine cycle	biological_process	7	2	6654	3	26712	0.15523	2	0	UP
GO:0010236	plastoquinone biosynthetic process	biological_process	8	2	6654	3	26712	0.15523	0	2	DOWN
GO:0006723	cuticle hydrocarbon biosynthetic process	biological_process	5	2	6654	3	26712	0.15523	0	2	DOWN
GO:0051176	positive regulation of sulfur metabolic process	biological_process	7	2	6654	3	26712	0.15523	2	0	UP
GO:0046187	acetaldehyde catabolic process	biological_process	7	2	6654	3	26712	0.15523	0	2	DOWN
GO:0021549	cerebellum development	biological_process	12	2	6654	3	26712	0.15523	0	2	DOWN
GO:0004030	aldehyde dehydrogenase [NAD(P)+] activity	molecular_function	7	2	6654	3	26712	0.15523	0	2	DOWN
GO:0010166	wax metabolic process	biological_process	4	2	6654	3	26712	0.15523	0	2	DOWN
GO:0042549	photosystem II stabilization	biological_process	8	2	6654	3	26712	0.15523	0	2	DOWN
GO:0008430	selenium binding	molecular_function	4	2	6654	3	26712	0.15523	2	0	UP
GO:0071158	positive regulation of cell cycle arrest	biological_process	9	2	6654	3	26712	0.15523	0	2	DOWN
GO:0080116	glucuronoxylan glucuronosyltransferase activity	molecular_function	8	2	6654	3	26712	0.15523	0	2	DOWN
GO:0016701	oxidoreductase activity, acting on single donors with incorporation of molecular oxygen	molecular_function	5	2	6654	3	26712	0.15523	2	0	UP
GO:0010086	embryonic root morphogenesis	biological_process	8	2	6654	3	26712	0.15523	0	2	DOWN
GO:0033306	phytol metabolic process	biological_process	9	2	6654	3	26712	0.15523	0	2	DOWN
GO:0031468	nuclear envelope reassembly	biological_process	7	2	6654	3	26712	0.15523	2	0	UP
GO:0033946	xyloglucan-specific endo-beta-1,4-glucanase activity	molecular_function	8	2	6654	3	26712	0.15523	0	2	DOWN
GO:0043496	regulation of protein homodimerization activity	biological_process	7	2	6654	3	26712	0.15523	0	2	DOWN
GO:0045926	negative regulation of growth	biological_process	5	2	6654	3	26712	0.15523	0	2	DOWN
GO:0016206	catechol O-methyltransferase activity	molecular_function	8	2	6654	3	26712	0.15523	0	2	DOWN
GO:0033481	galacturonate biosynthetic process	biological_process	9	2	6654	3	26712	0.15523	0	2	DOWN
GO:0019363	pyridine nucleotide biosynthetic process	biological_process	10	2	6654	3	26712	0.15523	2	0	UP
GO:1902183	regulation of shoot apical meristem development	biological_process	10	2	6654	3	26712	0.15523	0	2	DOWN
GO:0046622	positive regulation of organ growth	biological_process	7	2	6654	3	26712	0.15523	2	0	UP
GO:0051070	galactomannan biosynthetic process	biological_process	8	2	6654	3	26712	0.15523	0	2	DOWN
GO:0048498	establishment of petal orientation	biological_process	8	2	6654	3	26712	0.15523	0	2	DOWN
GO:0044419	interspecies interaction between organisms	biological_process	4	2	6654	3	26712	0.15523	0	2	DOWN
GO:0047100	glyceraldehyde-3-phosphate dehydrogenase (NADP+) (phosphorylating) activity	molecular_function	7	2	6654	3	26712	0.15523	0	2	DOWN
GO:0048657	anther wall tapetum cell differentiation	biological_process	7	2	6654	3	26712	0.15523	0	2	DOWN
GO:0006067	ethanol metabolic process	biological_process	8	2	6654	3	26712	0.15523	0	2	DOWN
GO:0015245	fatty acid transporter activity	molecular_function	6	2	6654	3	26712	0.15523	0	2	DOWN
GO:0009885	transmembrane histidine kinase cytokinin receptor activity	molecular_function	10	2	6654	3	26712	0.15523	0	2	DOWN
GO:0008114	phosphogluconate 2-dehydrogenase activity	molecular_function	7	2	6654	3	26712	0.15523	2	0	UP
GO:0032496	response to lipopolysaccharide	biological_process	7	2	6654	3	26712	0.15523	0	2	DOWN
GO:0090480	purine nucleotide-sugar transmembrane transport	biological_process	7	2	6654	3	26712	0.15523	0	2	DOWN
GO:0004764	shikimate 3-dehydrogenase (NADP+) activity	molecular_function	7	2	6654	3	26712	0.15523	2	0	UP
GO:0045991	carbon catabolite activation of transcription	biological_process	13	2	6654	3	26712	0.15523	0	2	DOWN
GO:0052386	cell wall thickening	biological_process	7	2	6654	3	26712	0.15523	2	0	UP
GO:0009517	PSII associated light-harvesting complex II	cellular_component	13	2	6654	3	26712	0.15523	0	2	DOWN
GO:0004160	dihydroxy-acid dehydratase activity	molecular_function	7	2	6654	3	26712	0.15523	2	0	UP
GO:0019413	acetate biosynthetic process	biological_process	9	2	6654	3	26712	0.15523	0	2	DOWN
GO:0006725	cellular aromatic compound metabolic process	biological_process	5	2	6654	3	26712	0.15523	2	0	UP
GO:0009899	ent-kaurene synthase activity	molecular_function	8	2	6654	3	26712	0.15523	2	0	UP
GO:0004866	endopeptidase inhibitor activity	molecular_function	6	2	6654	3	26712	0.15523	2	0	UP
GO:0005094	Rho GDP-dissociation inhibitor activity	molecular_function	8	2	6654	3	26712	0.15523	0	2	DOWN
GO:0010392	galactoglucomannan metabolic process	biological_process	8	2	6654	3	26712	0.15523	0	2	DOWN
GO:0004791	thioredoxin-disulfide reductase activity	molecular_function	7	2	6654	3	26712	0.15523	0	2	DOWN
GO:0046863	ribulose-1,5-bisphosphate carboxylase/oxygenase activator activity	molecular_function	5	2	6654	3	26712	0.15523	0	2	DOWN
GO:0000819	sister chromatid segregation	biological_process	6	2	6654	3	26712	0.15523	0	2	DOWN
GO:0019955	cytokine binding	molecular_function	5	2	6654	3	26712	0.15523	0	2	DOWN
GO:1990058	fruit replum development	biological_process	7	2	6654	3	26712	0.15523	2	0	UP
GO:0042135	neurotransmitter catabolic process	biological_process	6	2	6654	3	26712	0.15523	0	2	DOWN
GO:0070483	detection of hypoxia	biological_process	6	5	6654	12	26712	0.155746	5	0	UP
GO:0031222	arabinan catabolic process	biological_process	7	5	6654	12	26712	0.155746	5	0	UP
GO:0071492	cellular response to UV-A	biological_process	9	4	6654	9	26712	0.164016	0	4	DOWN
GO:0019684	photosynthesis, light reaction	biological_process	6	4	6654	9	26712	0.164016	0	4	DOWN
GO:0018171	peptidyl-cysteine oxidation	biological_process	9	4	6654	9	26712	0.164016	4	0	UP
GO:0004435	phosphatidylinositol phospholipase C activity	molecular_function	9	3	6654	6	26712	0.167992	0	3	DOWN
GO:0032544	plastid translation	biological_process	8	3	6654	6	26712	0.167992	0	3	DOWN
GO:0047412	N-(long-chain-acyl)ethanolamine deacylase activity	molecular_function	7	3	6654	6	26712	0.167992	0	3	DOWN
GO:0010077	maintenance of inflorescence meristem identity	biological_process	11	3	6654	6	26712	0.167992	0	3	DOWN
GO:0004014	adenosylmethionine decarboxylase activity	molecular_function	7	3	6654	6	26712	0.167992	3	0	UP
GO:0060918	auxin transport	biological_process	6	3	6654	6	26712	0.167992	0	3	DOWN
GO:0010106	cellular response to iron ion starvation	biological_process	9	3	6654	6	26712	0.167992	3	0	UP
GO:0009435	NAD biosynthetic process	biological_process	12	3	6654	6	26712	0.167992	3	0	UP
GO:0010358	leaf shaping	biological_process	10	3	6654	6	26712	0.167992	0	3	DOWN
GO:0004040	amidase activity	molecular_function	7	3	6654	6	26712	0.167992	0	3	DOWN
GO:0004629	phospholipase C activity	molecular_function	8	3	6654	6	26712	0.167992	0	3	DOWN
GO:0060776	simple leaf morphogenesis	biological_process	10	3	6654	6	26712	0.167992	3	0	UP
GO:0070291	N-acylethanolamine metabolic process	biological_process	9	3	6654	6	26712	0.167992	0	3	DOWN
GO:0043572	plastid fission	biological_process	6	3	6654	6	26712	0.167992	0	3	DOWN
GO:0006597	spermine biosynthetic process	biological_process	10	3	6654	6	26712	0.167992	3	0	UP
GO:0042550	photosystem I stabilization	biological_process	8	3	6654	6	26712	0.167992	0	3	DOWN
GO:0047372	acylglycerol lipase activity	molecular_function	7	3	6654	6	26712	0.167992	0	3	DOWN
GO:0008295	spermidine biosynthetic process	biological_process	10	3	6654	6	26712	0.167992	3	0	UP
GO:0010067	procambium histogenesis	biological_process	8	7	6654	19	26712	0.172357	0	7	DOWN
GO:0048038	quinone binding	molecular_function	5	7	6654	19	26712	0.172357	0	7	DOWN
GO:0003954	NADH dehydrogenase activity	molecular_function	6	6	6654	16	26712	0.187225	0	6	DOWN
GO:0010290	chlorophyll catabolite transmembrane transporter activity	molecular_function	6	6	6654	16	26712	0.187225	6	0	UP
GO:0015431	glutathione S-conjugate-exporting ATPase activity	molecular_function	14	6	6654	16	26712	0.187225	6	0	UP
GO:0016651	oxidoreductase activity, acting on NAD(P)H	molecular_function	5	5	6654	13	26712	0.203735	0	5	DOWN
GO:0004620	phospholipase activity	molecular_function	7	5	6654	13	26712	0.203735	0	5	DOWN
GO:0009044	xylan 1,4-beta-xylosidase activity	molecular_function	8	6	6654	17	26712	0.231891	6	0	UP
GO:0046556	alpha-L-arabinofuranosidase activity	molecular_function	7	6	6654	17	26712	0.231891	6	0	UP
GO:0010031	circumnutation	biological_process	6	3	6654	7	26712	0.241708	0	3	DOWN
GO:0050291	sphingosine N-acyltransferase activity	molecular_function	8	3	6654	7	26712	0.241708	3	0	UP
GO:0010241	ent-kaurene oxidation to kaurenoic acid	biological_process	9	3	6654	7	26712	0.241708	0	3	DOWN
GO:0016847	1-aminocyclopropane-1-carboxylate synthase activity	molecular_function	6	3	6654	7	26712	0.241708	3	0	UP
GO:0006000	fructose metabolic process	biological_process	9	3	6654	7	26712	0.241708	0	3	DOWN
GO:0009787	regulation of abscisic acid-activated signaling pathway	biological_process	9	3	6654	7	26712	0.241708	0	3	DOWN
GO:1901601	strigolactone biosynthetic process	biological_process	9	3	6654	7	26712	0.241708	0	3	DOWN
GO:0007205	protein kinase C-activating G-protein coupled receptor signaling pathway	biological_process	9	3	6654	7	26712	0.241708	0	3	DOWN
GO:0038023	signaling receptor activity	molecular_function	4	3	6654	7	26712	0.241708	0	3	DOWN
GO:0034059	response to anoxia	biological_process	5	3	6654	7	26712	0.241708	3	0	UP
GO:0015695	organic cation transport	biological_process	7	3	6654	7	26712	0.241708	0	3	DOWN
GO:0072488	ammonium transmembrane transport	biological_process	7	3	6654	7	26712	0.241708	0	3	DOWN
GO:0061634	alpha-D-xyloside xylohydrolase	molecular_function	7	3	6654	7	26712	0.241708	3	0	UP
GO:0005089	Rho guanyl-nucleotide exchange factor activity	molecular_function	5	3	6654	7	26712	0.241708	0	3	DOWN
GO:0090351	seedling development	biological_process	7	3	6654	7	26712	0.241708	0	3	DOWN
GO:0006624	vacuolar protein processing	biological_process	7	3	6654	7	26712	0.241708	0	3	DOWN
GO:0004143	diacylglycerol kinase activity	molecular_function	7	3	6654	7	26712	0.241708	0	3	DOWN
GO:0006285	base-excision repair, AP site formation	biological_process	9	1	6654	1	26712	0.249102	0	1	DOWN
GO:0051503	adenine nucleotide transport	biological_process	8	1	6654	1	26712	0.249102	0	1	DOWN
GO:0010490	UDP-4-keto-rhamnose-4-keto-reductase activity	molecular_function	7	1	6654	1	26712	0.249102	0	1	DOWN
GO:0043782	cobalt-precorrin-3 C17-methyltransferase activity	molecular_function	7	1	6654	1	26712	0.249102	0	1	DOWN
GO:0043776	cobalt-precorrin-6B C5-methyltransferase activity	molecular_function	7	1	6654	1	26712	0.249102	0	1	DOWN
GO:0050910	detection of mechanical stimulus involved in sensory perception of sound	biological_process	10	1	6654	1	26712	0.249102	0	1	DOWN
GO:0010357	homogentisate solanesyltransferase activity	molecular_function	8	1	6654	1	26712	0.249102	0	1	DOWN
GO:0001162	RNA polymerase II intronic transcription regulatory region sequence-specific DNA binding	molecular_function	11	1	6654	1	26712	0.249102	0	1	DOWN
GO:0008832	dGTPase activity	molecular_function	8	1	6654	1	26712	0.249102	0	1	DOWN
GO:0045550	geranylgeranyl reductase activity	molecular_function	5	1	6654	1	26712	0.249102	0	1	DOWN
GO:0072357	PTW/PP1 phosphatase complex	cellular_component	6	1	6654	1	26712	0.249102	0	1	DOWN
GO:0080187	floral organ senescence	biological_process	6	1	6654	1	26712	0.249102	0	1	DOWN
GO:0046028	electron transporter, transferring electrons from cytochrome b6/f complex of photosystem II activity	molecular_function	4	1	6654	1	26712	0.249102	0	1	DOWN
GO:0000026	alpha-1,2-mannosyltransferase activity	molecular_function	8	1	6654	1	26712	0.249102	1	0	UP
GO:0008210	estrogen metabolic process	biological_process	6	1	6654	1	26712	0.249102	0	1	DOWN
GO:0014070	response to organic cyclic compound	biological_process	6	1	6654	1	26712	0.249102	0	1	DOWN
GO:0010276	phytol kinase activity	molecular_function	7	1	6654	1	26712	0.249102	0	1	DOWN
GO:0050334	thiaminase activity	molecular_function	6	1	6654	1	26712	0.249102	1	0	UP
GO:0046922	peptide-O-fucosyltransferase activity	molecular_function	8	1	6654	1	26712	0.249102	0	1	DOWN
GO:0008988	rRNA (adenine-N6-)-methyltransferase activity	molecular_function	8	1	6654	1	26712	0.249102	0	1	DOWN
GO:0035672	oligopeptide transmembrane transport	biological_process	6	1	6654	1	26712	0.249102	0	1	DOWN
GO:0047940	glucuronokinase activity	molecular_function	7	1	6654	1	26712	0.249102	1	0	UP
GO:0008395	steroid hydroxylase activity	molecular_function	6	1	6654	1	26712	0.249102	1	0	UP
GO:0050421	nitrite reductase (NO-forming) activity	molecular_function	7	1	6654	1	26712	0.249102	1	0	UP
GO:0048147	negative regulation of fibroblast proliferation	biological_process	6	1	6654	1	26712	0.249102	0	1	DOWN
GO:0019702	protein-arginine N5-methyltransferase activity	molecular_function	10	1	6654	1	26712	0.249102	0	1	DOWN
GO:0097218	sieve plate	cellular_component	8	1	6654	1	26712	0.249102	0	1	DOWN
GO:0004370	glycerol kinase activity	molecular_function	7	1	6654	1	26712	0.249102	1	0	UP
GO:0086010	membrane depolarization during action potential	biological_process	7	1	6654	1	26712	0.249102	0	1	DOWN
GO:0032958	inositol phosphate biosynthetic process	biological_process	9	1	6654	1	26712	0.249102	0	1	DOWN
GO:1900384	regulation of flavonol biosynthetic process	biological_process	9	1	6654	1	26712	0.249102	0	1	DOWN
GO:0003914	DNA (6-4) photolyase activity	molecular_function	7	1	6654	1	26712	0.249102	0	1	DOWN
GO:0080142	regulation of salicylic acid biosynthetic process	biological_process	10	1	6654	1	26712	0.249102	0	1	DOWN
GO:0004723	calcium-dependent protein serine/threonine phosphatase activity	molecular_function	10	1	6654	1	26712	0.249102	0	1	DOWN
GO:0009923	fatty acid elongase complex	cellular_component	12	1	6654	1	26712	0.249102	0	1	DOWN
GO:0080012	trihydroxyferuloyl spermidine O-methyltransferase activity	molecular_function	8	1	6654	1	26712	0.249102	0	1	DOWN
GO:0034541	dimethylarsinite methyltransferase activity	molecular_function	7	1	6654	1	26712	0.249102	0	1	DOWN
GO:0043834	trimethylamine methyltransferase activity	molecular_function	7	1	6654	1	26712	0.249102	0	1	DOWN
GO:0047218	hydroxycinnamate 4-beta-glucosyltransferase activity	molecular_function	8	1	6654	1	26712	0.249102	1	0	UP
GO:0042462	eye photoreceptor cell development	biological_process	12	1	6654	1	26712	0.249102	0	1	DOWN
GO:0007009	plasma membrane organization	biological_process	5	1	6654	1	26712	0.249102	0	1	DOWN
GO:0005221	intracellular cyclic nucleotide activated cation channel activity	molecular_function	11	1	6654	1	26712	0.249102	0	1	DOWN
GO:0033354	chlorophyll cycle	biological_process	9	1	6654	1	26712	0.249102	0	1	DOWN
GO:0016433	rRNA (adenine) methyltransferase activity	molecular_function	9	1	6654	1	26712	0.249102	0	1	DOWN
GO:0016784	3-mercaptopyruvate sulfurtransferase activity	molecular_function	7	1	6654	1	26712	0.249102	1	0	UP
GO:0010101	post-embryonic root morphogenesis	biological_process	8	1	6654	1	26712	0.249102	1	0	UP
GO:0008425	2-polyprenyl-6-methoxy-1,4-benzoquinone methyltransferase activity	molecular_function	9	1	6654	1	26712	0.249102	0	1	DOWN
GO:0003880	protein C-terminal carboxyl O-methyltransferase activity	molecular_function	10	1	6654	1	26712	0.249102	0	1	DOWN
GO:0030552	cAMP binding	molecular_function	9	1	6654	1	26712	0.249102	0	1	DOWN
GO:0030076	light-harvesting complex	cellular_component	7	1	6654	1	26712	0.249102	0	1	DOWN
GO:0071549	cellular response to dexamethasone stimulus	biological_process	11	1	6654	1	26712	0.249102	0	1	DOWN
GO:0051493	regulation of cytoskeleton organization	biological_process	6	1	6654	1	26712	0.249102	0	1	DOWN
GO:0080046	quercetin 4'-O-glucosyltransferase activity	molecular_function	8	1	6654	1	26712	0.249102	1	0	UP
GO:0050281	serine-glyoxylate transaminase activity	molecular_function	7	1	6654	1	26712	0.249102	0	1	DOWN
GO:0033799	myricetin 3'-O-methyltransferase activity	molecular_function	8	1	6654	1	26712	0.249102	0	1	DOWN
GO:0052665	tRNA (uracil-2'-O-)-methyltransferase activity	molecular_function	10	1	6654	1	26712	0.249102	0	1	DOWN
GO:0030286	dynein complex	cellular_component	12	1	6654	1	26712	0.249102	0	1	DOWN
GO:0046345	abscisic acid catabolic process	biological_process	9	1	6654	1	26712	0.249102	0	1	DOWN
GO:0060072	large conductance calcium-activated potassium channel activity	molecular_function	11	1	6654	1	26712	0.249102	0	1	DOWN
GO:0015977	carbon fixation	biological_process	5	1	6654	1	26712	0.249102	0	1	DOWN
GO:0007628	adult walking behavior	biological_process	6	1	6654	1	26712	0.249102	0	1	DOWN
GO:0010356	homogentisate geranylgeranyltransferase activity	molecular_function	8	1	6654	1	26712	0.249102	0	1	DOWN
GO:0010489	UDP-4-keto-6-deoxy-glucose-3,5-epimerase activity	molecular_function	7	1	6654	1	26712	0.249102	0	1	DOWN
GO:0080074	spermidine:caffeoyl CoA N-acyltransferase activity	molecular_function	8	1	6654	1	26712	0.249102	0	1	DOWN
GO:0030553	cGMP binding	molecular_function	9	1	6654	1	26712	0.249102	0	1	DOWN
GO:0010309	acireductone dioxygenase [iron(II)-requiring] activity	molecular_function	7	1	6654	1	26712	0.249102	1	0	UP
GO:0015871	choline transport	biological_process	9	1	6654	1	26712	0.249102	0	1	DOWN
GO:0047763	caffeate O-methyltransferase activity	molecular_function	8	1	6654	1	26712	0.249102	0	1	DOWN
GO:0009573	chloroplast ribulose bisphosphate carboxylase complex	cellular_component	13	1	6654	1	26712	0.249102	0	1	DOWN
GO:0033138	positive regulation of peptidyl-serine phosphorylation	biological_process	10	1	6654	1	26712	0.249102	0	1	DOWN
GO:0007612	learning	biological_process	6	1	6654	1	26712	0.249102	0	1	DOWN
GO:0090150	establishment of protein localization to membrane	biological_process	6	1	6654	1	26712	0.249102	0	1	DOWN
GO:0080075	spermidine:feruloyl CoA N-acyltransferase activity	molecular_function	8	1	6654	1	26712	0.249102	0	1	DOWN
GO:0000828	inositol hexakisphosphate kinase activity	molecular_function	7	1	6654	1	26712	0.249102	0	1	DOWN
GO:0007517	muscle organ development	biological_process	8	1	6654	1	26712	0.249102	0	1	DOWN
GO:0016708	oxidoreductase activity, acting on paired donors, with incorporation or reduction of molecular oxygen, NAD(P)H as one donor, and incorporation of two atoms of oxygen into one donor	molecular_function	6	1	6654	1	26712	0.249102	1	0	UP
GO:0005996	monosaccharide metabolic process	biological_process	7	1	6654	1	26712	0.249102	0	1	DOWN
GO:0080013	(E,E)-geranyllinalool synthase activity	molecular_function	7	1	6654	1	26712	0.249102	1	0	UP
GO:1902247	geranylgeranyl diphosphate catabolic process	biological_process	9	1	6654	1	26712	0.249102	1	0	UP
GO:0007586	digestion	biological_process	5	1	6654	1	26712	0.249102	0	1	DOWN
GO:0005179	hormone activity	molecular_function	6	1	6654	1	26712	0.249102	1	0	UP
GO:0019779	Atg8 activating enzyme activity	molecular_function	7	1	6654	1	26712	0.249102	0	1	DOWN
GO:0009019	tRNA (guanine-N1-)-methyltransferase activity	molecular_function	10	1	6654	1	26712	0.249102	0	1	DOWN
GO:0052887	7,9,9'-tricis-neurosporene:quinone oxidoreductase activity	molecular_function	7	1	6654	1	26712	0.249102	0	1	DOWN
GO:0051060	pullulanase activity	molecular_function	7	1	6654	1	26712	0.249102	0	1	DOWN
GO:0090603	sieve element differentiation	biological_process	7	1	6654	1	26712	0.249102	0	1	DOWN
GO:0004760	serine-pyruvate transaminase activity	molecular_function	7	1	6654	1	26712	0.249102	0	1	DOWN
GO:0080175	phragmoplast microtubule organization	biological_process	7	1	6654	1	26712	0.249102	0	1	DOWN
GO:0045211	postsynaptic membrane	cellular_component	8	1	6654	1	26712	0.249102	0	1	DOWN
GO:0033862	UMP kinase activity	molecular_function	10	1	6654	1	26712	0.249102	0	1	DOWN
GO:0009836	fruit ripening, climacteric	biological_process	6	1	6654	1	26712	0.249102	1	0	UP
GO:0050266	rosmarinate synthase activity	molecular_function	7	1	6654	1	26712	0.249102	0	1	DOWN
GO:0008543	fibroblast growth factor receptor signaling pathway	biological_process	10	1	6654	1	26712	0.249102	0	1	DOWN
GO:0008764	UDP-N-acetylmuramoylalanine-D-glutamate ligase activity	molecular_function	7	1	6654	1	26712	0.249102	0	1	DOWN
GO:0030436	asexual sporulation	biological_process	5	1	6654	1	26712	0.249102	0	1	DOWN
GO:0042964	thioredoxin biosynthetic process	biological_process	7	1	6654	1	26712	0.249102	0	1	DOWN
GO:0031154	culmination involved in sorocarp development	biological_process	6	1	6654	1	26712	0.249102	0	1	DOWN
GO:1902243	copal-8-ol diphosphate(3-) biosynthetic process	biological_process	9	1	6654	1	26712	0.249102	1	0	UP
GO:0052667	phosphomethylethanolamine N-methyltransferase activity	molecular_function	8	1	6654	1	26712	0.249102	0	1	DOWN
GO:0050162	oxalate oxidase activity	molecular_function	7	1	6654	1	26712	0.249102	0	1	DOWN
GO:0045930	negative regulation of mitotic cell cycle	biological_process	8	1	6654	1	26712	0.249102	0	1	DOWN
GO:0046460	neutral lipid biosynthetic process	biological_process	6	1	6654	1	26712	0.249102	0	1	DOWN
GO:0046785	microtubule polymerization	biological_process	8	1	6654	1	26712	0.249102	0	1	DOWN
GO:0019133	choline monooxygenase activity	molecular_function	7	1	6654	1	26712	0.249102	1	0	UP
GO:0043738	reduced coenzyme F420 dehydrogenase activity	molecular_function	5	1	6654	1	26712	0.249102	1	0	UP
GO:0014904	myotube cell development	biological_process	10	1	6654	1	26712	0.249102	0	1	DOWN
GO:0002039	p53 binding	molecular_function	5	1	6654	1	26712	0.249102	0	1	DOWN
GO:0032928	regulation of superoxide anion generation	biological_process	8	1	6654	1	26712	0.249102	0	1	DOWN
GO:0034931	1-hydroxypyrene methyltransferase activity	molecular_function	7	1	6654	1	26712	0.249102	0	1	DOWN
GO:0008748	N-ethylmaleimide reductase activity	molecular_function	5	1	6654	1	26712	0.249102	1	0	UP
GO:0043914	NADPH:sulfur oxidoreductase activity	molecular_function	5	1	6654	1	26712	0.249102	1	0	UP
GO:0042617	paclitaxel biosynthetic process	biological_process	7	1	6654	1	26712	0.249102	0	1	DOWN
GO:0043780	cobalt-precorrin-5B C1-methyltransferase activity	molecular_function	7	1	6654	1	26712	0.249102	0	1	DOWN
GO:0030792	methylarsonite methyltransferase activity	molecular_function	8	1	6654	1	26712	0.249102	0	1	DOWN
GO:0031017	exocrine pancreas development	biological_process	8	1	6654	1	26712	0.249102	0	1	DOWN
GO:1901611	phosphatidylglycerol binding	molecular_function	6	1	6654	1	26712	0.249102	0	1	DOWN
GO:0015812	gamma-aminobutyric acid transport	biological_process	10	1	6654	1	26712	0.249102	0	1	DOWN
GO:0008169	C-methyltransferase activity	molecular_function	7	1	6654	1	26712	0.249102	0	1	DOWN
GO:0000495	box H/ACA snoRNA 3'-end processing	biological_process	13	1	6654	1	26712	0.249102	1	0	UP
GO:0008830	dTDP-4-dehydrorhamnose 3,5-epimerase activity	molecular_function	7	1	6654	1	26712	0.249102	0	1	DOWN
GO:0016278	lysine N-methyltransferase activity	molecular_function	8	1	6654	1	26712	0.249102	0	1	DOWN
GO:0042632	cholesterol homeostasis	biological_process	9	1	6654	1	26712	0.249102	0	1	DOWN
GO:0009383	rRNA (cytosine-C5-)-methyltransferase activity	molecular_function	8	1	6654	1	26712	0.249102	0	1	DOWN
GO:0016436	rRNA (uridine) methyltransferase activity	molecular_function	9	1	6654	1	26712	0.249102	0	1	DOWN
GO:0006754	ATP biosynthetic process	biological_process	11	1	6654	1	26712	0.249102	0	1	DOWN
GO:2000189	positive regulation of cholesterol homeostasis	biological_process	7	1	6654	1	26712	0.249102	0	1	DOWN
GO:0016833	oxo-acid-lyase activity	molecular_function	6	1	6654	1	26712	0.249102	1	0	UP
GO:0008782	adenosylhomocysteine nucleosidase activity	molecular_function	7	1	6654	1	26712	0.249102	1	0	UP
GO:0009544	chloroplast ATP synthase complex	cellular_component	14	1	6654	1	26712	0.249102	0	1	DOWN
GO:0052624	2-phytyl-1,4-naphthoquinone methyltransferase activity	molecular_function	8	1	6654	1	26712	0.249102	0	1	DOWN
GO:0016102	diterpenoid biosynthetic process	biological_process	8	1	6654	1	26712	0.249102	1	0	UP
GO:0035987	endodermal cell differentiation	biological_process	7	1	6654	1	26712	0.249102	0	1	DOWN
GO:0042420	dopamine catabolic process	biological_process	7	1	6654	1	26712	0.249102	0	1	DOWN
GO:0048662	negative regulation of smooth muscle cell proliferation	biological_process	6	1	6654	1	26712	0.249102	0	1	DOWN
GO:0006558	L-phenylalanine metabolic process	biological_process	8	1	6654	1	26712	0.249102	0	1	DOWN
GO:0071862	protein phosphatase type 1 activator activity	molecular_function	7	1	6654	1	26712	0.249102	0	1	DOWN
GO:0032433	filopodium tip	cellular_component	7	1	6654	1	26712	0.249102	0	1	DOWN
GO:0046167	glycerol-3-phosphate biosynthetic process	biological_process	7	1	6654	1	26712	0.249102	1	0	UP
GO:1900087	positive regulation of G1/S transition of mitotic cell cycle	biological_process	10	1	6654	1	26712	0.249102	0	1	DOWN
GO:0008064	regulation of actin polymerization or depolymerization	biological_process	9	1	6654	1	26712	0.249102	0	1	DOWN
GO:0033344	cholesterol efflux	biological_process	8	1	6654	1	26712	0.249102	0	1	DOWN
GO:0034081	polyketide synthase complex	cellular_component	9	1	6654	1	26712	0.249102	1	0	UP
GO:0035266	meristem growth	biological_process	9	1	6654	1	26712	0.249102	1	0	UP
GO:0008174	mRNA methyltransferase activity	molecular_function	8	1	6654	1	26712	0.249102	0	1	DOWN
GO:0016984	ribulose-bisphosphate carboxylase activity	molecular_function	7	1	6654	1	26712	0.249102	0	1	DOWN
GO:0004648	O-phospho-L-serine:2-oxoglutarate aminotransferase activity	molecular_function	7	1	6654	1	26712	0.249102	1	0	UP
GO:0071327	cellular response to trehalose stimulus	biological_process	9	1	6654	1	26712	0.249102	0	1	DOWN
GO:0044794	positive regulation by host of viral process	biological_process	7	1	6654	1	26712	0.249102	1	0	UP
GO:0005048	signal sequence binding	molecular_function	6	1	6654	1	26712	0.249102	0	1	DOWN
GO:0030912	response to deep water	biological_process	6	1	6654	1	26712	0.249102	0	1	DOWN
GO:0071484	cellular response to light intensity	biological_process	8	1	6654	1	26712	0.249102	0	1	DOWN
GO:0031579	membrane raft organization	biological_process	5	1	6654	1	26712	0.249102	0	1	DOWN
GO:0009974	zeinoxanthin epsilon hydroxylase activity	molecular_function	7	1	6654	1	26712	0.249102	0	1	DOWN
GO:0004371	glycerone kinase activity	molecular_function	7	1	6654	1	26712	0.249102	1	0	UP
GO:0005222	intracellular cAMP activated cation channel activity	molecular_function	12	1	6654	1	26712	0.249102	0	1	DOWN
GO:0048569	post-embryonic organ development	biological_process	8	1	6654	1	26712	0.249102	1	0	UP
GO:0031935	regulation of chromatin silencing	biological_process	12	1	6654	1	26712	0.249102	1	0	UP
GO:0060567	negative regulation of DNA-templated transcription, termination	biological_process	11	1	6654	1	26712	0.249102	1	0	UP
GO:0042178	xenobiotic catabolic process	biological_process	6	1	6654	1	26712	0.249102	0	1	DOWN
GO:0008734	L-aspartate oxidase activity	molecular_function	8	1	6654	1	26712	0.249102	1	0	UP
GO:0043833	methylamine-specific methylcobalamin:coenzyme M methyltransferase activity	molecular_function	7	1	6654	1	26712	0.249102	0	1	DOWN
GO:0050502	cis-zeatin O-beta-D-glucosyltransferase activity	molecular_function	8	1	6654	1	26712	0.249102	1	0	UP
GO:0036071	N-glycan fucosylation	biological_process	9	1	6654	1	26712	0.249102	0	1	DOWN
GO:0016426	tRNA (adenine) methyltransferase activity	molecular_function	9	1	6654	1	26712	0.249102	0	1	DOWN
GO:0043803	hydroxyneurosporene-O-methyltransferase activity	molecular_function	7	1	6654	1	26712	0.249102	0	1	DOWN
GO:0043826	sulfur oxygenase reductase activity	molecular_function	5	1	6654	1	26712	0.249102	1	0	UP
GO:0017169	CDP-alcohol phosphatidyltransferase activity	molecular_function	7	1	6654	1	26712	0.249102	0	1	DOWN
GO:0005245	voltage-gated calcium channel activity	molecular_function	11	1	6654	1	26712	0.249102	0	1	DOWN
GO:0019285	glycine betaine biosynthetic process from choline	biological_process	10	1	6654	1	26712	0.249102	1	0	UP
GO:0043852	monomethylamine methyltransferase activity	molecular_function	7	1	6654	1	26712	0.249102	0	1	DOWN
GO:1900367	positive regulation of defense response to insect	biological_process	8	1	6654	1	26712	0.249102	0	1	DOWN
GO:0000975	regulatory region DNA binding	molecular_function	7	1	6654	1	26712	0.249102	0	1	DOWN
GO:0010638	positive regulation of organelle organization	biological_process	5	1	6654	1	26712	0.249102	0	1	DOWN
GO:0016434	rRNA (cytosine) methyltransferase activity	molecular_function	9	1	6654	1	26712	0.249102	0	1	DOWN
GO:0004073	aspartate-semialdehyde dehydrogenase activity	molecular_function	7	1	6654	1	26712	0.249102	1	0	UP
GO:0034807	4,5-dihydroxybenzo(a)pyrene methyltransferase activity	molecular_function	7	1	6654	1	26712	0.249102	0	1	DOWN
GO:0071366	cellular response to indolebutyric acid stimulus	biological_process	7	1	6654	1	26712	0.249102	0	1	DOWN
GO:0010581	regulation of starch biosynthetic process	biological_process	10	1	6654	1	26712	0.249102	0	1	DOWN
GO:0046428	1,4-dihydroxy-2-naphthoate octaprenyltransferase activity	molecular_function	8	1	6654	1	26712	0.249102	0	1	DOWN
GO:0045840	positive regulation of mitotic nuclear division	biological_process	9	1	6654	1	26712	0.249102	1	0	UP
GO:0051118	glucan endo-1,3-alpha-glucosidase activity	molecular_function	8	1	6654	1	26712	0.249102	1	0	UP
GO:0051994	P-methyltransferase activity	molecular_function	7	1	6654	1	26712	0.249102	0	1	DOWN
GO:0045184	establishment of protein localization	biological_process	6	1	6654	1	26712	0.249102	0	1	DOWN
GO:0032592	integral component of mitochondrial membrane	cellular_component	14	1	6654	1	26712	0.249102	1	0	UP
GO:0015421	oligopeptide-transporting ATPase activity	molecular_function	14	1	6654	1	26712	0.249102	0	1	DOWN
GO:0005955	calcineurin complex	cellular_component	7	1	6654	1	26712	0.249102	0	1	DOWN
GO:0007614	short-term memory	biological_process	7	1	6654	1	26712	0.249102	0	1	DOWN
GO:0097185	cellular response to azide	biological_process	7	1	6654	1	26712	0.249102	0	1	DOWN
GO:0015714	phosphoenolpyruvate transport	biological_process	10	1	6654	1	26712	0.249102	1	0	UP
GO:0044545	NSL complex	cellular_component	9	1	6654	1	26712	0.249102	0	1	DOWN
GO:0042144	vacuole fusion, non-autophagic	biological_process	6	1	6654	1	26712	0.249102	0	1	DOWN
GO:0046718	viral entry into host cell	biological_process	7	1	6654	1	26712	0.249102	0	1	DOWN
GO:0080090	regulation of primary metabolic process	biological_process	5	1	6654	1	26712	0.249102	0	1	DOWN
GO:0047893	flavonol 3-O-glucosyltransferase activity	molecular_function	8	1	6654	1	26712	0.249102	1	0	UP
GO:0071633	dihydroceramidase activity	molecular_function	7	1	6654	1	26712	0.249102	0	1	DOWN
GO:0051995	Se-methyltransferase activity	molecular_function	7	1	6654	1	26712	0.249102	0	1	DOWN
GO:0051562	negative regulation of mitochondrial calcium ion concentration	biological_process	12	1	6654	1	26712	0.249102	1	0	UP
GO:0051930	regulation of sensory perception of pain	biological_process	9	1	6654	1	26712	0.249102	0	1	DOWN
GO:0030744	luteolin O-methyltransferase activity	molecular_function	8	1	6654	1	26712	0.249102	0	1	DOWN
GO:0000280	nuclear division	biological_process	6	1	6654	1	26712	0.249102	0	1	DOWN
GO:0033614	chloroplast proton-transporting ATP synthase complex assembly	biological_process	7	1	6654	1	26712	0.249102	0	1	DOWN
GO:1901696	cannabinoid biosynthetic process	biological_process	6	1	6654	1	26712	0.249102	1	0	UP
GO:0060841	venous blood vessel development	biological_process	9	1	6654	1	26712	0.249102	0	1	DOWN
GO:0070971	endoplasmic reticulum exit site	cellular_component	11	1	6654	1	26712	0.249102	0	1	DOWN
GO:0045111	intermediate filament cytoskeleton	cellular_component	10	1	6654	1	26712	0.249102	0	1	DOWN
GO:0048307	ferredoxin-nitrite reductase activity	molecular_function	7	1	6654	1	26712	0.249102	1	0	UP
GO:0016242	negative regulation of macroautophagy	biological_process	9	1	6654	1	26712	0.249102	0	1	DOWN
GO:0032441	pheophorbide a oxygenase activity	molecular_function	6	1	6654	1	26712	0.249102	0	1	DOWN
GO:1900871	chloroplast mRNA modification	biological_process	11	1	6654	1	26712	0.249102	0	1	DOWN
GO:0003842	1-pyrroline-5-carboxylate dehydrogenase activity	molecular_function	7	1	6654	1	26712	0.249102	1	0	UP
GO:0005275	amine transmembrane transporter activity	molecular_function	6	1	6654	1	26712	0.249102	0	1	DOWN
GO:0018423	protein C-terminal leucine carboxyl O-methyltransferase activity	molecular_function	11	1	6654	1	26712	0.249102	0	1	DOWN
GO:0019210	kinase inhibitor activity	molecular_function	5	1	6654	1	26712	0.249102	0	1	DOWN
GO:0043458	ethanol biosynthetic process involved in glucose fermentation to ethanol	biological_process	11	1	6654	1	26712	0.249102	0	1	DOWN
GO:0004835	tubulin-tyrosine ligase activity	molecular_function	7	1	6654	1	26712	0.249102	1	0	UP
GO:0008158	hedgehog receptor activity	molecular_function	6	1	6654	1	26712	0.249102	0	1	DOWN
GO:0070761	pre-snoRNP complex	cellular_component	8	1	6654	1	26712	0.249102	1	0	UP
GO:0043827	tRNA (adenine-57, 58-N(1)-) methyltransferase activity	molecular_function	11	1	6654	1	26712	0.249102	0	1	DOWN
GO:0003973	(S)-2-hydroxy-acid oxidase activity	molecular_function	7	1	6654	1	26712	0.249102	0	1	DOWN
GO:0019544	arginine catabolic process to glutamate	biological_process	11	1	6654	1	26712	0.249102	1	0	UP
GO:0005513	detection of calcium ion	biological_process	8	1	6654	1	26712	0.249102	0	1	DOWN
GO:0021762	substantia nigra development	biological_process	11	1	6654	1	26712	0.249102	0	1	DOWN
GO:0008756	o-succinylbenzoate-CoA ligase activity	molecular_function	7	1	6654	1	26712	0.249102	0	1	DOWN
GO:0009972	cytidine deamination	biological_process	12	1	6654	1	26712	0.249102	0	1	DOWN
GO:0010455	positive regulation of cell fate commitment	biological_process	9	1	6654	1	26712	0.249102	1	0	UP
GO:0042392	sphingosine-1-phosphate phosphatase activity	molecular_function	8	1	6654	1	26712	0.249102	0	1	DOWN
GO:0046486	glycerolipid metabolic process	biological_process	6	1	6654	1	26712	0.249102	0	1	DOWN
GO:0050017	L-3-cyanoalanine synthase activity	molecular_function	6	1	6654	1	26712	0.249102	1	0	UP
GO:0048254	snoRNA localization	biological_process	6	1	6654	1	26712	0.249102	1	0	UP
GO:2000021	regulation of ion homeostasis	biological_process	6	1	6654	1	26712	0.249102	0	1	DOWN
GO:0043327	chemotaxis to cAMP	biological_process	6	1	6654	1	26712	0.249102	0	1	DOWN
GO:1902417	(+)-abscisic acid D-glucopyranosyl ester transmembrane transporter activity	molecular_function	7	1	6654	1	26712	0.249102	1	0	UP
GO:0047037	salutaridine reductase (NADPH) activity	molecular_function	7	1	6654	1	26712	0.249102	1	0	UP
GO:0000041	transition metal ion transport	biological_process	8	1	6654	1	26712	0.249102	1	0	UP
GO:0070574	cadmium ion transmembrane transport	biological_process	7	1	6654	1	26712	0.249102	1	0	UP
GO:0031152	aggregation involved in sorocarp development	biological_process	6	1	6654	1	26712	0.249102	1	0	UP
GO:0008930	methylthioadenosine nucleosidase activity	molecular_function	8	1	6654	1	26712	0.249102	1	0	UP
GO:0009670	triose-phosphate:phosphate antiporter activity	molecular_function	9	1	6654	1	26712	0.249102	1	0	UP
GO:0071291	cellular response to selenium ion	biological_process	8	1	6654	1	26712	0.249102	1	0	UP
GO:0031344	regulation of cell projection organization	biological_process	6	1	6654	1	26712	0.249102	0	1	DOWN
GO:0010374	stomatal complex development	biological_process	7	1	6654	1	26712	0.249102	0	1	DOWN
GO:0036033	mediator complex binding	molecular_function	6	1	6654	1	26712	0.249102	1	0	UP
GO:0048870	cell motility	biological_process	6	1	6654	1	26712	0.249102	0	1	DOWN
GO:0000906	6,7-dimethyl-8-ribityllumazine synthase activity	molecular_function	7	1	6654	1	26712	0.249102	0	1	DOWN
GO:0043883	malolactic enzyme activity	molecular_function	5	1	6654	1	26712	0.249102	1	0	UP
GO:0080072	spermidine:sinapoyl CoA N-acyltransferase activity	molecular_function	8	1	6654	1	26712	0.249102	0	1	DOWN
GO:0010121	arginine catabolic process to proline via ornithine	biological_process	12	1	6654	1	26712	0.249102	1	0	UP
GO:0016719	carotene 7,8-desaturase activity	molecular_function	6	1	6654	1	26712	0.249102	0	1	DOWN
GO:0089711	L-glutamate transmembrane transport	biological_process	9	1	6654	1	26712	0.249102	0	1	DOWN
GO:0000725	recombinational repair	biological_process	10	1	6654	1	26712	0.249102	1	0	UP
GO:0018707	1-phenanthrol methyltransferase activity	molecular_function	7	1	6654	1	26712	0.249102	0	1	DOWN
GO:0033385	geranylgeranyl diphosphate metabolic process	biological_process	8	1	6654	1	26712	0.249102	0	1	DOWN
GO:0001786	phosphatidylserine binding	molecular_function	6	1	6654	1	26712	0.249102	0	1	DOWN
GO:0031261	DNA replication preinitiation complex	cellular_component	13	1	6654	1	26712	0.249102	0	1	DOWN
GO:0052636	arabinosyltransferase activity	molecular_function	7	1	6654	1	26712	0.249102	1	0	UP
GO:0005656	nuclear pre-replicative complex	cellular_component	13	1	6654	1	26712	0.249102	0	1	DOWN
GO:0008172	S-methyltransferase activity	molecular_function	7	1	6654	1	26712	0.249102	0	1	DOWN
GO:0043457	regulation of cellular respiration	biological_process	8	1	6654	1	26712	0.249102	1	0	UP
GO:0047055	salutaridine synthase activity	molecular_function	7	1	6654	1	26712	0.249102	1	0	UP
GO:0000322	storage vacuole	cellular_component	10	1	6654	1	26712	0.249102	1	0	UP
GO:0016869	intramolecular transferase activity, transferring amino groups	molecular_function	6	1	6654	1	26712	0.249102	0	1	DOWN
GO:0046554	malate dehydrogenase (NADP+) activity	molecular_function	7	1	6654	1	26712	0.249102	0	1	DOWN
GO:0043851	methanol-specific methylcobalamin:coenzyme M methyltransferase activity	molecular_function	7	1	6654	1	26712	0.249102	0	1	DOWN
GO:0031501	mannosyltransferase complex	cellular_component	7	1	6654	1	26712	0.249102	0	1	DOWN
GO:0009108	coenzyme biosynthetic process	biological_process	7	1	6654	1	26712	0.249102	0	1	DOWN
GO:0006935	chemotaxis	biological_process	5	1	6654	1	26712	0.249102	0	1	DOWN
GO:0052597	diamine oxidase activity	molecular_function	7	1	6654	1	26712	0.249102	0	1	DOWN
GO:0055068	cobalt ion homeostasis	biological_process	11	1	6654	1	26712	0.249102	1	0	UP
GO:0015121	phosphoenolpyruvate:phosphate antiporter activity	molecular_function	9	1	6654	1	26712	0.249102	1	0	UP
GO:0061635	regulation of protein complex stability	biological_process	5	1	6654	1	26712	0.249102	0	1	DOWN
GO:0015087	cobalt ion transmembrane transporter activity	molecular_function	11	1	6654	1	26712	0.249102	1	0	UP
GO:0019731	antibacterial humoral response	biological_process	7	1	6654	1	26712	0.249102	0	1	DOWN
GO:0012506	vesicle membrane	cellular_component	5	1	6654	1	26712	0.249102	1	0	UP
GO:0042821	pyridoxal biosynthetic process	biological_process	9	1	6654	1	26712	0.249102	0	1	DOWN
GO:0004851	uroporphyrin-III C-methyltransferase activity	molecular_function	8	1	6654	1	26712	0.249102	1	0	UP
GO:0030385	ferredoxin:thioredoxin reductase activity	molecular_function	6	1	6654	1	26712	0.249102	0	1	DOWN
GO:0010478	chlororespiration	biological_process	9	1	6654	1	26712	0.249102	0	1	DOWN
GO:0016205	selenocysteine methyltransferase activity	molecular_function	8	1	6654	1	26712	0.249102	0	1	DOWN
GO:1902418	(+)-abscisic acid D-glucopyranosyl ester transmembrane transport	biological_process	6	1	6654	1	26712	0.249102	1	0	UP
GO:0000957	mitochondrial RNA catabolic process	biological_process	9	1	6654	1	26712	0.249102	1	0	UP
GO:0007605	sensory perception of sound	biological_process	9	1	6654	1	26712	0.249102	0	1	DOWN
GO:0006824	cobalt ion transport	biological_process	9	1	6654	1	26712	0.249102	1	0	UP
GO:0080091	regulation of raffinose metabolic process	biological_process	9	1	6654	1	26712	0.249102	0	1	DOWN
GO:0018063	cytochrome c-heme linkage	biological_process	10	1	6654	1	26712	0.249102	1	0	UP
GO:0019478	D-amino acid catabolic process	biological_process	9	1	6654	1	26712	0.249102	1	0	UP
GO:0030003	cellular cation homeostasis	biological_process	8	1	6654	1	26712	0.249102	0	1	DOWN
GO:0031417	NatC complex	cellular_component	10	1	6654	1	26712	0.249102	1	0	UP
GO:0030946	protein tyrosine phosphatase activity, metal-dependent	molecular_function	10	1	6654	1	26712	0.249102	0	1	DOWN
GO:0045158	electron transporter, transferring electrons within cytochrome b6/f complex of photosystem II activity	molecular_function	4	1	6654	1	26712	0.249102	0	1	DOWN
GO:0050668	positive regulation of homocysteine metabolic process	biological_process	11	1	6654	1	26712	0.249102	0	1	DOWN
GO:0052666	tRNA (cytosine-2'-O-)-methyltransferase activity	molecular_function	10	1	6654	1	26712	0.249102	0	1	DOWN
GO:0016300	tRNA (uracil) methyltransferase activity	molecular_function	9	1	6654	1	26712	0.249102	0	1	DOWN
GO:0033014	tetrapyrrole biosynthetic process	biological_process	7	1	6654	1	26712	0.249102	1	0	UP
GO:0080155	regulation of double fertilization forming a zygote and endosperm	biological_process	7	1	6654	1	26712	0.249102	1	0	UP
GO:0033106	cis-Golgi network membrane	cellular_component	7	1	6654	1	26712	0.249102	0	1	DOWN
GO:0051409	response to nitrosative stress	biological_process	5	1	6654	1	26712	0.249102	0	1	DOWN
GO:0019778	Atg12 activating enzyme activity	molecular_function	7	1	6654	1	26712	0.249102	0	1	DOWN
GO:0007263	nitric oxide mediated signal transduction	biological_process	9	1	6654	1	26712	0.249102	0	1	DOWN
GO:0016274	protein-arginine N-methyltransferase activity	molecular_function	9	1	6654	1	26712	0.249102	0	1	DOWN
GO:0005976	polysaccharide metabolic process	biological_process	6	1	6654	1	26712	0.249102	1	0	UP
GO:0002227	innate immune response in mucosa	biological_process	7	1	6654	1	26712	0.249102	0	1	DOWN
GO:0043791	dimethylamine methyltransferase activity	molecular_function	7	1	6654	1	26712	0.249102	0	1	DOWN
GO:0009374	biotin binding	molecular_function	5	1	6654	1	26712	0.249102	0	1	DOWN
GO:0048265	response to pain	biological_process	6	1	6654	1	26712	0.249102	0	1	DOWN
GO:0042820	vitamin B6 catabolic process	biological_process	8	1	6654	1	26712	0.249102	0	1	DOWN
GO:0015185	gamma-aminobutyric acid transmembrane transporter activity	molecular_function	9	1	6654	1	26712	0.249102	0	1	DOWN
GO:0052096	formation by symbiont of syncytium involving giant cell for nutrient acquisition from host	biological_process	8	1	6654	1	26712	0.249102	0	1	DOWN
GO:0006734	NADH metabolic process	biological_process	13	1	6654	1	26712	0.249102	1	0	UP
GO:0080141	regulation of jasmonic acid biosynthetic process	biological_process	11	1	6654	1	26712	0.249102	0	1	DOWN
GO:0042326	negative regulation of phosphorylation	biological_process	9	1	6654	1	26712	0.249102	0	1	DOWN
GO:0071404	cellular response to low-density lipoprotein particle stimulus	biological_process	8	1	6654	1	26712	0.249102	0	1	DOWN
GO:0051897	positive regulation of protein kinase B signaling	biological_process	10	1	6654	1	26712	0.249102	0	1	DOWN
GO:0003002	regionalization	biological_process	7	1	6654	1	26712	0.249102	1	0	UP
GO:0015180	L-alanine transmembrane transporter activity	molecular_function	11	1	6654	1	26712	0.249102	0	1	DOWN
GO:0035436	triose phosphate transmembrane transport	biological_process	6	1	6654	1	26712	0.249102	1	0	UP
GO:0060217	hemangioblast cell differentiation	biological_process	9	1	6654	1	26712	0.249102	0	1	DOWN
GO:0006659	phosphatidylserine biosynthetic process	biological_process	8	1	6654	1	26712	0.249102	0	1	DOWN
GO:0010274	hydrotropism	biological_process	6	1	6654	1	26712	0.249102	1	0	UP
GO:1902977	mitotic DNA replication preinitiation complex assembly	biological_process	13	1	6654	1	26712	0.249102	0	1	DOWN
GO:0052757	chondroitin hydrolase activity	molecular_function	9	1	6654	1	26712	0.249102	0	1	DOWN
GO:0052886	9,9'-dicis-carotene:quinone oxidoreductase activity	molecular_function	7	1	6654	1	26712	0.249102	0	1	DOWN
GO:0010966	regulation of phosphate transport	biological_process	9	1	6654	1	26712	0.249102	0	1	DOWN
GO:0035814	negative regulation of renal sodium excretion	biological_process	9	1	6654	1	26712	0.249102	0	1	DOWN
GO:0080088	spermidine hydroxycinnamate conjugate biosynthetic process	biological_process	8	1	6654	1	26712	0.249102	0	1	DOWN
GO:0051499	D-aminoacyl-tRNA deacylase activity	molecular_function	7	1	6654	1	26712	0.249102	1	0	UP
GO:0016428	tRNA (cytosine-5-)-methyltransferase activity	molecular_function	10	1	6654	1	26712	0.249102	0	1	DOWN
GO:0015439	heme-transporting ATPase activity	molecular_function	13	1	6654	1	26712	0.249102	1	0	UP
GO:1901141	regulation of lignin biosynthetic process	biological_process	9	1	6654	1	26712	0.249102	0	1	DOWN
GO:0010331	gibberellin binding	molecular_function	6	1	6654	1	26712	0.249102	1	0	UP
GO:0015267	channel activity	molecular_function	6	1	6654	1	26712	0.249102	0	1	DOWN
GO:0010355	homogentisate farnesyltransferase activity	molecular_function	8	1	6654	1	26712	0.249102	0	1	DOWN
GO:0016707	gibberellin 3-beta-dioxygenase activity	molecular_function	7	1	6654	1	26712	0.249102	1	0	UP
GO:0090415	7-hydroxymethyl chlorophyll a reductase activity	molecular_function	7	1	6654	1	26712	0.249102	0	1	DOWN
GO:0004592	pantoate-beta-alanine ligase activity	molecular_function	7	1	6654	1	26712	0.249102	1	0	UP
GO:0070677	rRNA (cytosine-2'-O-)-methyltransferase activity	molecular_function	8	1	6654	1	26712	0.249102	0	1	DOWN
GO:0097100	supercoiled DNA binding	molecular_function	8	1	6654	1	26712	0.249102	0	1	DOWN
GO:0045963	negative regulation of dopamine metabolic process	biological_process	10	1	6654	1	26712	0.249102	0	1	DOWN
GO:0040025	vulval development	biological_process	9	1	6654	1	26712	0.249102	0	1	DOWN
GO:0003998	acylphosphatase activity	molecular_function	7	1	6654	1	26712	0.249102	0	1	DOWN
GO:0043770	demethylmenaquinone methyltransferase activity	molecular_function	7	1	6654	1	26712	0.249102	0	1	DOWN
GO:0047889	ferredoxin-nitrate reductase activity	molecular_function	7	1	6654	1	26712	0.249102	1	0	UP
GO:0004587	ornithine-oxo-acid transaminase activity	molecular_function	7	1	6654	1	26712	0.249102	1	0	UP
GO:0016273	arginine N-methyltransferase activity	molecular_function	8	1	6654	1	26712	0.249102	0	1	DOWN
GO:0000829	inositol heptakisphosphate kinase activity	molecular_function	7	1	6654	1	26712	0.249102	0	1	DOWN
GO:0009008	DNA-methyltransferase activity	molecular_function	7	1	6654	1	26712	0.249102	0	1	DOWN
GO:0071383	cellular response to steroid hormone stimulus	biological_process	8	1	6654	1	26712	0.249102	0	1	DOWN
GO:0044318	L-aspartate:fumarate oxidoreductase activity	molecular_function	6	1	6654	1	26712	0.249102	1	0	UP
GO:0052693	epoxyqueuosine reductase activity	molecular_function	5	1	6654	1	26712	0.249102	1	0	UP
GO:0071218	cellular response to misfolded protein	biological_process	7	1	6654	1	26712	0.249102	0	1	DOWN
GO:0098572	stromal side of plastid thylakoid membrane	cellular_component	11	1	6654	1	26712	0.249102	0	1	DOWN
GO:0045197	establishment or maintenance of epithelial cell apical/basal polarity	biological_process	8	1	6654	1	26712	0.249102	0	1	DOWN
GO:1990072	TRAPPIII protein complex	cellular_component	11	1	6654	1	26712	0.249102	0	1	DOWN
GO:0016776	phosphotransferase activity, phosphate group as acceptor	molecular_function	6	1	6654	1	26712	0.249102	0	1	DOWN
GO:0033728	divinyl chlorophyllide a 8-vinyl-reductase activity	molecular_function	7	1	6654	1	26712	0.249102	0	1	DOWN
GO:0008271	secondary active sulfate transmembrane transporter activity	molecular_function	7	1	6654	1	26712	0.249102	1	0	UP
GO:0052735	tRNA (cytosine-3-)-methyltransferase activity	molecular_function	10	1	6654	1	26712	0.249102	0	1	DOWN
GO:0017016	Ras GTPase binding	molecular_function	8	1	6654	1	26712	0.249102	0	1	DOWN
GO:0045254	pyruvate dehydrogenase complex	cellular_component	9	1	6654	1	26712	0.249102	1	0	UP
GO:0050403	trans-zeatin O-beta-D-glucosyltransferase activity	molecular_function	8	1	6654	1	26712	0.249102	1	0	UP
GO:0033521	phytyl diphosphate biosynthetic process	biological_process	8	1	6654	1	26712	0.249102	0	1	DOWN
GO:0050236	pyridoxine:NADP 4-dehydrogenase activity	molecular_function	8	1	6654	1	26712	0.249102	0	1	DOWN
GO:0004126	cytidine deaminase activity	molecular_function	7	1	6654	1	26712	0.249102	0	1	DOWN
GO:0007043	cell-cell junction assembly	biological_process	7	1	6654	1	26712	0.249102	0	1	DOWN
GO:0050515	4-(cytidine 5'-diphospho)-2-C-methyl-D-erythritol kinase activity	molecular_function	7	1	6654	1	26712	0.249102	1	0	UP
GO:0008418	protein-N-terminal asparagine amidohydrolase activity	molecular_function	7	1	6654	1	26712	0.249102	0	1	DOWN
GO:0010303	limit dextrinase activity	molecular_function	7	1	6654	1	26712	0.249102	0	1	DOWN
GO:0000448	cleavage in ITS2 between 5.8S rRNA and LSU-rRNA of tricistronic rRNA transcript (SSU-rRNA, 5.8S rRNA, LSU-rRNA)	biological_process	14	1	6654	1	26712	0.249102	1	0	UP
GO:0015220	choline transmembrane transporter activity	molecular_function	7	1	6654	1	26712	0.249102	0	1	DOWN
GO:0052889	9,9'-di-cis-zeta-carotene desaturation to 7,9,7',9'-tetra-cis-lycopene	biological_process	9	1	6654	1	26712	0.249102	0	1	DOWN
GO:0034933	1-hydroxy-6-methoxypyrene methyltransferase activity	molecular_function	7	1	6654	1	26712	0.249102	0	1	DOWN
GO:0010301	xanthoxin dehydrogenase activity	molecular_function	8	1	6654	1	26712	0.249102	0	1	DOWN
GO:0000979	RNA polymerase II core promoter sequence-specific DNA binding	molecular_function	11	1	6654	1	26712	0.249102	0	1	DOWN
GO:0050284	sinapate 1-glucosyltransferase activity	molecular_function	8	1	6654	1	26712	0.249102	1	0	UP
GO:0051744	3,8-divinyl protochlorophyllide a 8-vinyl reductase activity	molecular_function	5	1	6654	1	26712	0.249102	0	1	DOWN
GO:0070530	K63-linked polyubiquitin binding	molecular_function	8	1	6654	1	26712	0.249102	1	0	UP
GO:0097371	MDM2/MDM4 family protein binding	molecular_function	5	1	6654	1	26712	0.249102	0	1	DOWN
GO:0001707	mesoderm formation	biological_process	10	1	6654	1	26712	0.249102	0	1	DOWN
GO:0016429	tRNA (adenine-N1-)-methyltransferase activity	molecular_function	10	1	6654	1	26712	0.249102	0	1	DOWN
GO:0035444	nickel cation transmembrane transport	biological_process	7	1	6654	1	26712	0.249102	1	0	UP
GO:0043197	dendritic spine	cellular_component	8	1	6654	1	26712	0.249102	0	1	DOWN
GO:0043777	cobalt-precorrin-7 C15-methyltransferase activity	molecular_function	7	1	6654	1	26712	0.249102	0	1	DOWN
GO:0016412	serine O-acyltransferase activity	molecular_function	8	1	6654	1	26712	0.249102	1	0	UP
GO:0030755	quercetin 3-O-methyltransferase activity	molecular_function	8	1	6654	1	26712	0.249102	0	1	DOWN
GO:0000798	nuclear cohesin complex	cellular_component	13	1	6654	1	26712	0.249102	0	1	DOWN
GO:0050505	hydroquinone glucosyltransferase activity	molecular_function	8	1	6654	1	26712	0.249102	0	1	DOWN
GO:0047262	polygalacturonate 4-alpha-galacturonosyltransferase activity	molecular_function	7	5	6654	14	26712	0.255791	0	5	DOWN
GO:0034450	ubiquitin-ubiquitin ligase activity	molecular_function	8	2	6654	4	26712	0.260196	0	2	DOWN
GO:0050203	oxalate-CoA ligase activity	molecular_function	7	2	6654	4	26712	0.260196	2	0	UP
GO:0016236	macroautophagy	biological_process	7	2	6654	4	26712	0.260196	0	2	DOWN
GO:0004306	ethanolamine-phosphate cytidylyltransferase activity	molecular_function	8	2	6654	4	26712	0.260196	0	2	DOWN
GO:0006552	leucine catabolic process	biological_process	9	2	6654	4	26712	0.260196	2	0	UP
GO:0009561	megagametogenesis	biological_process	8	2	6654	4	26712	0.260196	0	2	DOWN
GO:1901672	positive regulation of systemic acquired resistance	biological_process	9	2	6654	4	26712	0.260196	0	2	DOWN
GO:0043085	positive regulation of catalytic activity	biological_process	5	2	6654	4	26712	0.260196	0	2	DOWN
GO:0004108	citrate (Si)-synthase activity	molecular_function	8	2	6654	4	26712	0.260196	2	0	UP
GO:0009835	fruit ripening	biological_process	5	2	6654	4	26712	0.260196	0	2	DOWN
GO:0005319	lipid transporter activity	molecular_function	5	2	6654	4	26712	0.260196	0	2	DOWN
GO:0031304	intrinsic component of mitochondrial inner membrane	cellular_component	14	2	6654	4	26712	0.260196	0	2	DOWN
GO:0045792	negative regulation of cell size	biological_process	7	2	6654	4	26712	0.260196	0	2	DOWN
GO:2000023	regulation of lateral root development	biological_process	9	2	6654	4	26712	0.260196	0	2	DOWN
GO:0035066	positive regulation of histone acetylation	biological_process	11	2	6654	4	26712	0.260196	0	2	DOWN
GO:0051016	barbed-end actin filament capping	biological_process	13	2	6654	4	26712	0.260196	0	2	DOWN
GO:0080073	spermidine:coumaroyl CoA N-acyltransferase activity	molecular_function	8	2	6654	4	26712	0.260196	0	2	DOWN
GO:0051782	negative regulation of cell division	biological_process	7	2	6654	4	26712	0.260196	0	2	DOWN
GO:0031490	chromatin DNA binding	molecular_function	5	2	6654	4	26712	0.260196	0	2	DOWN
GO:0005977	glycogen metabolic process	biological_process	8	2	6654	4	26712	0.260196	0	2	DOWN
GO:0046621	negative regulation of organ growth	biological_process	7	2	6654	4	26712	0.260196	0	2	DOWN
GO:0010377	guard cell fate commitment	biological_process	8	2	6654	4	26712	0.260196	0	2	DOWN
GO:0005793	endoplasmic reticulum-Golgi intermediate compartment	cellular_component	9	2	6654	4	26712	0.260196	0	2	DOWN
GO:0010500	transmitting tissue development	biological_process	7	2	6654	4	26712	0.260196	2	0	UP
GO:0009729	detection of brassinosteroid stimulus	biological_process	7	2	6654	4	26712	0.260196	0	2	DOWN
GO:0016174	NAD(P)H oxidase activity	molecular_function	7	2	6654	4	26712	0.260196	0	2	DOWN
GO:0010050	vegetative phase change	biological_process	7	2	6654	4	26712	0.260196	0	2	DOWN
GO:0043765	T/G mismatch-specific endonuclease activity	molecular_function	8	2	6654	4	26712	0.260196	0	2	DOWN
GO:0034256	chlorophyll(ide) b reductase activity	molecular_function	7	2	6654	4	26712	0.260196	0	2	DOWN
GO:0008752	FMN reductase activity	molecular_function	7	2	6654	4	26712	0.260196	0	2	DOWN
GO:0016605	PML body	cellular_component	14	2	6654	4	26712	0.260196	0	2	DOWN
GO:0010258	NADH dehydrogenase complex (plastoquinone) assembly	biological_process	10	2	6654	4	26712	0.260196	0	2	DOWN
GO:0045177	apical part of cell	cellular_component	5	2	6654	4	26712	0.260196	0	2	DOWN
GO:0016123	xanthophyll biosynthetic process	biological_process	10	2	6654	4	26712	0.260196	0	2	DOWN
GO:0019674	NAD metabolic process	biological_process	12	2	6654	4	26712	0.260196	2	0	UP
GO:0010629	negative regulation of gene expression	biological_process	8	2	6654	4	26712	0.260196	0	2	DOWN
GO:0033611	oxalate catabolic process	biological_process	9	2	6654	4	26712	0.260196	2	0	UP
GO:0031492	nucleosomal DNA binding	molecular_function	6	2	6654	4	26712	0.260196	0	2	DOWN
GO:0097153	cysteine-type endopeptidase activity involved in apoptotic process	molecular_function	9	2	6654	4	26712	0.260196	0	2	DOWN
GO:0051640	organelle localization	biological_process	5	2	6654	4	26712	0.260196	0	2	DOWN
GO:0004350	glutamate-5-semialdehyde dehydrogenase activity	molecular_function	7	2	6654	4	26712	0.260196	2	0	UP
GO:0009575	chromoplast stroma	cellular_component	11	2	6654	4	26712	0.260196	0	2	DOWN
GO:0000786	nucleosome	cellular_component	12	18	6654	62	26712	0.26778	0	18	DOWN
GO:0045493	xylan catabolic process	biological_process	8	6	6654	18	26712	0.27941	6	0	UP
GO:0007010	cytoskeleton organization	biological_process	5	9	6654	29	26712	0.283466	0	9	DOWN
GO:0016702	oxidoreductase activity, acting on single donors with incorporation of molecular oxygen, incorporation of two atoms of oxygen	molecular_function	6	4	6654	11	26712	0.284199	0	4	DOWN
GO:0035336	long-chain fatty-acyl-CoA metabolic process	biological_process	9	4	6654	11	26712	0.284199	0	4	DOWN
GO:0033617	mitochondrial respiratory chain complex IV assembly	biological_process	7	4	6654	11	26712	0.284199	4	0	UP
GO:0009061	anaerobic respiration	biological_process	8	4	6654	11	26712	0.284199	4	0	UP
GO:0006163	purine nucleotide metabolic process	biological_process	10	4	6654	11	26712	0.284199	4	0	UP
GO:0015194	L-serine transmembrane transporter activity	molecular_function	11	4	6654	11	26712	0.284199	0	4	DOWN
GO:0019538	protein metabolic process	biological_process	5	5	6654	15	26712	0.310518	0	5	DOWN
GO:0008378	galactosyltransferase activity	molecular_function	7	5	6654	15	26712	0.310518	0	5	DOWN
GO:0010229	inflorescence development	biological_process	7	5	6654	15	26712	0.310518	0	5	DOWN
GO:0055028	cortical microtubule	cellular_component	10	3	6654	8	26712	0.319208	0	3	DOWN
GO:0009638	phototropism	biological_process	6	3	6654	8	26712	0.319208	0	3	DOWN
GO:0010196	nonphotochemical quenching	biological_process	8	3	6654	8	26712	0.319208	0	3	DOWN
GO:0007338	single fertilization	biological_process	6	3	6654	8	26712	0.319208	0	3	DOWN
GO:0042644	chloroplast nucleoid	cellular_component	13	3	6654	8	26712	0.319208	0	3	DOWN
GO:0046513	ceramide biosynthetic process	biological_process	8	3	6654	8	26712	0.319208	3	0	UP
GO:0019740	nitrogen utilization	biological_process	4	3	6654	8	26712	0.319208	0	3	DOWN
GO:0042937	tripeptide transporter activity	molecular_function	7	6	6654	19	26712	0.328819	0	6	DOWN
GO:0007015	actin filament organization	biological_process	7	6	6654	19	26712	0.328819	0	6	DOWN
GO:0042939	tripeptide transport	biological_process	8	6	6654	19	26712	0.328819	0	6	DOWN
GO:0003968	RNA-directed RNA polymerase activity	molecular_function	8	6	6654	19	26712	0.328819	0	6	DOWN
GO:0009825	multidimensional cell growth	biological_process	6	10	6654	34	26712	0.331459	0	10	DOWN
GO:0004857	enzyme inhibitor activity	molecular_function	4	4	6654	12	26712	0.348425	0	4	DOWN
GO:0000228	nuclear chromosome	cellular_component	11	8	6654	27	26712	0.353128	0	8	DOWN
GO:0043234	protein complex	cellular_component	4	8	6654	27	26712	0.353128	0	8	DOWN
GO:0031047	gene silencing by RNA	biological_process	10	8	6654	27	26712	0.353128	0	8	DOWN
GO:0003830	beta-1,4-mannosylglycoprotein 4-beta-N-acetylglucosaminyltransferase activity	molecular_function	8	2	6654	5	26712	0.365292	0	2	DOWN
GO:0001682	tRNA 5'-leader removal	biological_process	12	2	6654	5	26712	0.365292	2	0	UP
GO:0071329	cellular response to sucrose stimulus	biological_process	9	2	6654	5	26712	0.365292	0	2	DOWN
GO:0042578	phosphoric ester hydrolase activity	molecular_function	6	2	6654	5	26712	0.365292	0	2	DOWN
GO:0010231	maintenance of seed dormancy	biological_process	7	2	6654	5	26712	0.365292	0	2	DOWN
GO:0042547	cell wall modification involved in multidimensional cell growth	biological_process	7	2	6654	5	26712	0.365292	0	2	DOWN
GO:0042493	response to drug	biological_process	5	2	6654	5	26712	0.365292	0	2	DOWN
GO:0004367	glycerol-3-phosphate dehydrogenase [NAD+] activity	molecular_function	7	2	6654	5	26712	0.365292	0	2	DOWN
GO:1900366	negative regulation of defense response to insect	biological_process	8	2	6654	5	26712	0.365292	0	2	DOWN
GO:0009915	phloem sucrose loading	biological_process	7	2	6654	5	26712	0.365292	0	2	DOWN
GO:0046168	glycerol-3-phosphate catabolic process	biological_process	7	2	6654	5	26712	0.365292	0	2	DOWN
GO:0000146	microfilament motor activity	molecular_function	10	2	6654	5	26712	0.365292	0	2	DOWN
GO:0008535	respiratory chain complex IV assembly	biological_process	9	2	6654	5	26712	0.365292	2	0	UP
GO:0003865	3-oxo-5-alpha-steroid 4-dehydrogenase activity	molecular_function	7	2	6654	5	26712	0.365292	0	2	DOWN
GO:0008898	S-adenosylmethionine-homocysteine S-methyltransferase activity	molecular_function	8	2	6654	5	26712	0.365292	2	0	UP
GO:0006665	sphingolipid metabolic process	biological_process	6	2	6654	5	26712	0.365292	0	2	DOWN
GO:0031210	phosphatidylcholine binding	molecular_function	6	2	6654	5	26712	0.365292	0	2	DOWN
GO:0004375	glycine dehydrogenase (decarboxylating) activity	molecular_function	7	2	6654	5	26712	0.365292	0	2	DOWN
GO:0046030	inositol trisphosphate phosphatase activity	molecular_function	9	2	6654	5	26712	0.365292	0	2	DOWN
GO:0009653	anatomical structure morphogenesis	biological_process	4	2	6654	5	26712	0.365292	0	2	DOWN
GO:0097249	mitochondrial respiratory chain supercomplex	cellular_component	14	2	6654	5	26712	0.365292	2	0	UP
GO:0042138	meiotic DNA double-strand break formation	biological_process	7	2	6654	5	26712	0.365292	0	2	DOWN
GO:1902347	response to strigolactone	biological_process	7	2	6654	5	26712	0.365292	0	2	DOWN
GO:0001927	exocyst assembly	biological_process	8	2	6654	5	26712	0.365292	0	2	DOWN
GO:0031429	box H/ACA snoRNP complex	cellular_component	10	2	6654	5	26712	0.365292	2	0	UP
GO:0046524	sucrose-phosphate synthase activity	molecular_function	8	2	6654	5	26712	0.365292	0	2	DOWN
GO:0000303	response to superoxide	biological_process	7	2	6654	5	26712	0.365292	2	0	UP
GO:0005384	manganese ion transmembrane transporter activity	molecular_function	11	2	6654	5	26712	0.365292	0	2	DOWN
GO:0042936	dipeptide transporter activity	molecular_function	7	8	6654	28	26712	0.395911	0	8	DOWN
GO:0042938	dipeptide transport	biological_process	8	8	6654	28	26712	0.395911	0	8	DOWN
GO:0016627	oxidoreductase activity, acting on the CH-CH group of donors	molecular_function	5	3	6654	9	26712	0.396804	0	3	DOWN
GO:0006796	phosphate-containing compound metabolic process	biological_process	6	3	6654	9	26712	0.396804	0	3	DOWN
GO:0019464	glycine decarboxylation via glycine cleavage system	biological_process	11	3	6654	9	26712	0.396804	0	3	DOWN
GO:0010047	fruit dehiscence	biological_process	7	3	6654	9	26712	0.396804	0	3	DOWN
GO:0009785	blue light signaling pathway	biological_process	8	3	6654	9	26712	0.396804	0	3	DOWN
GO:0043097	pyrimidine nucleoside salvage	biological_process	9	3	6654	9	26712	0.396804	0	3	DOWN
GO:0004849	uridine kinase activity	molecular_function	9	3	6654	9	26712	0.396804	0	3	DOWN
GO:0005034	osmosensor activity	molecular_function	6	3	6654	9	26712	0.396804	0	3	DOWN
GO:0008519	ammonium transmembrane transporter activity	molecular_function	6	3	6654	9	26712	0.396804	0	3	DOWN
GO:0006308	DNA catabolic process	biological_process	8	3	6654	9	26712	0.396804	0	3	DOWN
GO:0042343	indole glucosinolate metabolic process	biological_process	7	3	6654	9	26712	0.396804	3	0	UP
GO:0009884	cytokinin receptor activity	molecular_function	6	3	6654	9	26712	0.396804	0	3	DOWN
GO:0006206	pyrimidine nucleobase metabolic process	biological_process	9	3	6654	9	26712	0.396804	0	3	DOWN
GO:0000712	resolution of meiotic recombination intermediates	biological_process	8	4	6654	13	26712	0.412732	0	4	DOWN
GO:0048509	regulation of meristem development	biological_process	9	4	6654	13	26712	0.412732	0	4	DOWN
GO:0010192	mucilage biosynthetic process	biological_process	6	4	6654	13	26712	0.412732	0	4	DOWN
GO:0009958	positive gravitropism	biological_process	7	5	6654	17	26712	0.422673	0	5	DOWN
GO:0006002	fructose 6-phosphate metabolic process	biological_process	7	7	6654	25	26712	0.434739	7	0	UP
GO:0019439	aromatic compound catabolic process	biological_process	6	1	6654	2	26712	0.436158	1	0	UP
GO:0004305	ethanolamine kinase activity	molecular_function	7	1	6654	2	26712	0.436158	1	0	UP
GO:0048102	autophagic cell death	biological_process	7	1	6654	2	26712	0.436158	0	1	DOWN
GO:0034203	glycolipid translocation	biological_process	7	1	6654	2	26712	0.436158	1	0	UP
GO:0010262	somatic embryogenesis	biological_process	6	1	6654	2	26712	0.436158	0	1	DOWN
GO:0016783	sulfurtransferase activity	molecular_function	6	1	6654	2	26712	0.436158	1	0	UP
GO:0008839	4-hydroxy-tetrahydrodipicolinate reductase	molecular_function	7	1	6654	2	26712	0.436158	0	1	DOWN
GO:0071217	cellular response to external biotic stimulus	biological_process	6	1	6654	2	26712	0.436158	0	1	DOWN
GO:0050038	L-xylulose reductase (NADP+) activity	molecular_function	7	1	6654	2	26712	0.436158	0	1	DOWN
GO:0001094	TFIID-class transcription factor binding	molecular_function	8	1	6654	2	26712	0.436158	1	0	UP
GO:0052669	CTP:2-trans,-6-trans-farnesol kinase activity	molecular_function	9	1	6654	2	26712	0.436158	1	0	UP
GO:0046481	digalactosyldiacylglycerol synthase activity	molecular_function	8	1	6654	2	26712	0.436158	0	1	DOWN
GO:0004157	dihydropyrimidinase activity	molecular_function	7	1	6654	2	26712	0.436158	1	0	UP
GO:0048609	multicellular organismal reproductive process	biological_process	5	1	6654	2	26712	0.436158	0	1	DOWN
GO:0001570	vasculogenesis	biological_process	7	1	6654	2	26712	0.436158	0	1	DOWN
GO:0055070	copper ion homeostasis	biological_process	11	1	6654	2	26712	0.436158	0	1	DOWN
GO:0008883	glutamyl-tRNA reductase activity	molecular_function	7	1	6654	2	26712	0.436158	1	0	UP
GO:0060090	binding, bridging	molecular_function	4	1	6654	2	26712	0.436158	0	1	DOWN
GO:0071461	cellular response to redox state	biological_process	5	1	6654	2	26712	0.436158	0	1	DOWN
GO:0008670	2,4-dienoyl-CoA reductase (NADPH) activity	molecular_function	7	1	6654	2	26712	0.436158	1	0	UP
GO:0009755	hormone-mediated signaling pathway	biological_process	7	1	6654	2	26712	0.436158	0	1	DOWN
GO:0048438	floral whorl development	biological_process	5	1	6654	2	26712	0.436158	0	1	DOWN
GO:0005344	oxygen transporter activity	molecular_function	5	1	6654	2	26712	0.436158	1	0	UP
GO:0019233	sensory perception of pain	biological_process	8	1	6654	2	26712	0.436158	1	0	UP
GO:0051738	xanthophyll binding	molecular_function	6	1	6654	2	26712	0.436158	0	1	DOWN
GO:0035198	miRNA binding	molecular_function	7	1	6654	2	26712	0.436158	1	0	UP
GO:1901401	regulation of tetrapyrrole metabolic process	biological_process	7	1	6654	2	26712	0.436158	0	1	DOWN
GO:0031589	cell-substrate adhesion	biological_process	5	1	6654	2	26712	0.436158	0	1	DOWN
GO:0070204	2-succinyl-5-enolpyruvyl-6-hydroxy-3-cyclohexene-1-carboxylic-acid synthase activity	molecular_function	6	1	6654	2	26712	0.436158	0	1	DOWN
GO:0046480	galactolipid galactosyltransferase activity	molecular_function	8	1	6654	2	26712	0.436158	0	1	DOWN
GO:0010343	singlet oxygen-mediated programmed cell death	biological_process	8	1	6654	2	26712	0.436158	0	1	DOWN
GO:0043392	negative regulation of DNA binding	biological_process	7	1	6654	2	26712	0.436158	0	1	DOWN
GO:0030016	myofibril	cellular_component	10	1	6654	2	26712	0.436158	0	1	DOWN
GO:0009765	photosynthesis, light harvesting	biological_process	6	1	6654	2	26712	0.436158	0	1	DOWN
GO:0000025	maltose catabolic process	biological_process	8	1	6654	2	26712	0.436158	1	0	UP
GO:0046741	transport of virus in host, tissue to tissue	biological_process	8	1	6654	2	26712	0.436158	0	1	DOWN
GO:0009937	regulation of gibberellic acid mediated signaling pathway	biological_process	10	1	6654	2	26712	0.436158	0	1	DOWN
GO:0033613	activating transcription factor binding	molecular_function	6	1	6654	2	26712	0.436158	0	1	DOWN
GO:0047958	glycine:2-oxoglutarate aminotransferase activity	molecular_function	7	1	6654	2	26712	0.436158	0	1	DOWN
GO:0072684	mitochondrial tRNA 3'-trailer cleavage, endonucleolytic	biological_process	13	1	6654	2	26712	0.436158	1	0	UP
GO:0005911	cell-cell junction	cellular_component	4	1	6654	2	26712	0.436158	0	1	DOWN
GO:0032258	CVT pathway	biological_process	8	1	6654	2	26712	0.436158	0	1	DOWN
GO:0032446	protein modification by small protein conjugation	biological_process	9	1	6654	2	26712	0.436158	0	1	DOWN
GO:0030410	nicotianamine synthase activity	molecular_function	6	1	6654	2	26712	0.436158	0	1	DOWN
GO:0010226	response to lithium ion	biological_process	7	1	6654	2	26712	0.436158	0	1	DOWN
GO:0032940	secretion by cell	biological_process	5	1	6654	2	26712	0.436158	1	0	UP
GO:0046557	glucan endo-1,6-beta-glucosidase activity	molecular_function	9	1	6654	2	26712	0.436158	1	0	UP
GO:0010022	meristem determinacy	biological_process	10	1	6654	2	26712	0.436158	0	1	DOWN
GO:0004865	protein serine/threonine phosphatase inhibitor activity	molecular_function	7	1	6654	2	26712	0.436158	0	1	DOWN
GO:1902135	(+)-secoisolariciresinol biosynthetic process	biological_process	9	1	6654	2	26712	0.436158	1	0	UP
GO:0016423	tRNA (guanine) methyltransferase activity	molecular_function	9	1	6654	2	26712	0.436158	0	1	DOWN
GO:0019750	chloroplast localization	biological_process	7	1	6654	2	26712	0.436158	1	0	UP
GO:0006556	S-adenosylmethionine biosynthetic process	biological_process	11	1	6654	2	26712	0.436158	0	1	DOWN
GO:0016307	phosphatidylinositol phosphate kinase activity	molecular_function	7	1	6654	2	26712	0.436158	0	1	DOWN
GO:0051777	ent-kaurenoate oxidase activity	molecular_function	7	1	6654	2	26712	0.436158	0	1	DOWN
GO:0004169	dolichyl-phosphate-mannose-protein mannosyltransferase activity	molecular_function	8	1	6654	2	26712	0.436158	0	1	DOWN
GO:0004459	L-lactate dehydrogenase activity	molecular_function	7	1	6654	2	26712	0.436158	1	0	UP
GO:0006267	pre-replicative complex assembly involved in nuclear cell cycle DNA replication	biological_process	13	1	6654	2	26712	0.436158	0	1	DOWN
GO:0004633	phosphopantothenoylcysteine decarboxylase activity	molecular_function	7	1	6654	2	26712	0.436158	1	0	UP
GO:0010288	response to lead ion	biological_process	7	1	6654	2	26712	0.436158	0	1	DOWN
GO:0000703	oxidized pyrimidine nucleobase lesion DNA N-glycosylase activity	molecular_function	10	1	6654	2	26712	0.436158	0	1	DOWN
GO:0008732	L-allo-threonine aldolase activity	molecular_function	8	1	6654	2	26712	0.436158	0	1	DOWN
GO:0045842	positive regulation of mitotic metaphase/anaphase transition	biological_process	14	1	6654	2	26712	0.436158	0	1	DOWN
GO:0042736	NADH kinase activity	molecular_function	7	1	6654	2	26712	0.436158	1	0	UP
GO:0019216	regulation of lipid metabolic process	biological_process	6	1	6654	2	26712	0.436158	1	0	UP
GO:0032791	lead ion binding	molecular_function	7	1	6654	2	26712	0.436158	0	1	DOWN
GO:0043157	response to cation stress	biological_process	7	1	6654	2	26712	0.436158	0	1	DOWN
GO:0032107	regulation of response to nutrient levels	biological_process	7	1	6654	2	26712	0.436158	1	0	UP
GO:0004018	N6-(1,2-dicarboxyethyl)AMP AMP-lyase (fumarate-forming) activity	molecular_function	7	1	6654	2	26712	0.436158	1	0	UP
GO:1990534	thermospermine oxidase activity	molecular_function	7	1	6654	2	26712	0.436158	0	1	DOWN
GO:2000068	regulation of defense response to insect	biological_process	8	1	6654	2	26712	0.436158	1	0	UP
GO:0004654	polyribonucleotide nucleotidyltransferase activity	molecular_function	7	1	6654	2	26712	0.436158	1	0	UP
GO:1990055	phenylacetaldehyde synthase activity	molecular_function	4	1	6654	2	26712	0.436158	0	1	DOWN
GO:0016891	endoribonuclease activity, producing 5'-phosphomonoesters	molecular_function	9	1	6654	2	26712	0.436158	0	1	DOWN
GO:0052668	farnesol kinase activity	molecular_function	8	1	6654	2	26712	0.436158	1	0	UP
GO:0018580	nitronate monooxygenase activity	molecular_function	7	1	6654	2	26712	0.436158	1	0	UP
GO:0008135	translation factor activity, RNA binding	molecular_function	7	1	6654	2	26712	0.436158	1	0	UP
GO:0003942	N-acetyl-gamma-glutamyl-phosphate reductase activity	molecular_function	7	1	6654	2	26712	0.436158	1	0	UP
GO:0048701	embryonic cranial skeleton morphogenesis	biological_process	11	1	6654	2	26712	0.436158	0	1	DOWN
GO:0010055	atrichoblast differentiation	biological_process	8	1	6654	2	26712	0.436158	1	0	UP
GO:0033169	histone H3-K9 demethylation	biological_process	12	1	6654	2	26712	0.436158	0	1	DOWN
GO:0046820	4-amino-4-deoxychorismate synthase activity	molecular_function	7	1	6654	2	26712	0.436158	1	0	UP
GO:0010272	response to silver ion	biological_process	7	1	6654	2	26712	0.436158	0	1	DOWN
GO:0044297	cell body	cellular_component	5	1	6654	2	26712	0.436158	0	1	DOWN
GO:0033263	CORVET complex	cellular_component	11	1	6654	2	26712	0.436158	0	1	DOWN
GO:0009780	photosynthetic NADP+ reduction	biological_process	14	1	6654	2	26712	0.436158	0	1	DOWN
GO:0019567	arabinose biosynthetic process	biological_process	9	1	6654	2	26712	0.436158	0	1	DOWN
GO:0047918	GDP-mannose 3,5-epimerase activity	molecular_function	7	1	6654	2	26712	0.436158	0	1	DOWN
GO:1902448	positive regulation of shade avoidance	biological_process	10	1	6654	2	26712	0.436158	0	1	DOWN
GO:0098586	cellular response to virus	biological_process	8	1	6654	2	26712	0.436158	0	1	DOWN
GO:1901529	positive regulation of anion channel activity	biological_process	10	1	6654	2	26712	0.436158	0	1	DOWN
GO:0042853	L-alanine catabolic process	biological_process	11	1	6654	2	26712	0.436158	0	1	DOWN
GO:0016461	unconventional myosin complex	cellular_component	12	1	6654	2	26712	0.436158	0	1	DOWN
GO:0071731	response to nitric oxide	biological_process	7	1	6654	2	26712	0.436158	1	0	UP
GO:0005902	microvillus	cellular_component	6	1	6654	2	26712	0.436158	0	1	DOWN
GO:0070552	BRISC complex	cellular_component	11	1	6654	2	26712	0.436158	1	0	UP
GO:0017009	protein-phycocyanobilin linkage	biological_process	10	1	6654	2	26712	0.436158	0	1	DOWN
GO:0052671	geranylgeraniol kinase activity	molecular_function	8	1	6654	2	26712	0.436158	1	0	UP
GO:0031571	mitotic G1 DNA damage checkpoint	biological_process	13	1	6654	2	26712	0.436158	0	1	DOWN
GO:0043619	regulation of transcription from RNA polymerase II promoter in response to oxidative stress	biological_process	14	1	6654	2	26712	0.436158	1	0	UP
GO:0015103	inorganic anion transmembrane transporter activity	molecular_function	8	1	6654	2	26712	0.436158	1	0	UP
GO:0007565	female pregnancy	biological_process	5	1	6654	2	26712	0.436158	0	1	DOWN
GO:0040023	establishment of nucleus localization	biological_process	6	1	6654	2	26712	0.436158	0	1	DOWN
GO:0030692	Noc4p-Nop14p complex	cellular_component	10	1	6654	2	26712	0.436158	1	0	UP
GO:0052542	defense response by callose deposition	biological_process	6	1	6654	2	26712	0.436158	0	1	DOWN
GO:0045766	positive regulation of angiogenesis	biological_process	12	1	6654	2	26712	0.436158	0	1	DOWN
GO:0018023	peptidyl-lysine trimethylation	biological_process	8	1	6654	2	26712	0.436158	0	1	DOWN
GO:0035304	regulation of protein dephosphorylation	biological_process	9	1	6654	2	26712	0.436158	0	1	DOWN
GO:0009647	skotomorphogenesis	biological_process	7	1	6654	2	26712	0.436158	0	1	DOWN
GO:0052631	sphingolipid delta-8 desaturase activity	molecular_function	6	1	6654	2	26712	0.436158	0	1	DOWN
GO:0016630	protochlorophyllide reductase activity	molecular_function	7	1	6654	2	26712	0.436158	0	1	DOWN
GO:0004134	4-alpha-glucanotransferase activity	molecular_function	5	1	6654	2	26712	0.436158	1	0	UP
GO:0004452	isopentenyl-diphosphate delta-isomerase activity	molecular_function	7	1	6654	2	26712	0.436158	1	0	UP
GO:0046579	positive regulation of Ras protein signal transduction	biological_process	11	1	6654	2	26712	0.436158	0	1	DOWN
GO:0045824	negative regulation of innate immune response	biological_process	7	1	6654	2	26712	0.436158	1	0	UP
GO:1901332	negative regulation of lateral root development	biological_process	9	1	6654	2	26712	0.436158	0	1	DOWN
GO:0051980	iron-nicotianamine transmembrane transporter activity	molecular_function	6	1	6654	2	26712	0.436158	0	1	DOWN
GO:0004418	hydroxymethylbilane synthase activity	molecular_function	6	1	6654	2	26712	0.436158	0	1	DOWN
GO:0019725	cellular homeostasis	biological_process	5	1	6654	2	26712	0.436158	0	1	DOWN
GO:2000616	negative regulation of histone H3-K9 acetylation	biological_process	12	1	6654	2	26712	0.436158	1	0	UP
GO:0035174	histone serine kinase activity	molecular_function	9	1	6654	2	26712	0.436158	1	0	UP
GO:0033699	DNA 5'-adenosine monophosphate hydrolase activity	molecular_function	11	1	6654	2	26712	0.436158	0	1	DOWN
GO:0009000	selenocysteine lyase activity	molecular_function	6	1	6654	2	26712	0.436158	1	0	UP
GO:0005496	steroid binding	molecular_function	5	1	6654	2	26712	0.436158	0	1	DOWN
GO:0051219	phosphoprotein binding	molecular_function	5	1	6654	2	26712	0.436158	0	1	DOWN
GO:0080085	signal recognition particle, chloroplast targeting	cellular_component	10	1	6654	2	26712	0.436158	0	1	DOWN
GO:0046898	response to cycloheximide	biological_process	6	1	6654	2	26712	0.436158	0	1	DOWN
GO:0004377	GDP-Man:Man3GlcNAc2-PP-Dol alpha-1,2-mannosyltransferase activity	molecular_function	9	1	6654	2	26712	0.436158	1	0	UP
GO:0006479	protein methylation	biological_process	6	1	6654	2	26712	0.436158	0	1	DOWN
GO:2000072	regulation of defense response to fungus, incompatible interaction	biological_process	8	1	6654	2	26712	0.436158	1	0	UP
GO:0016410	N-acyltransferase activity	molecular_function	7	1	6654	2	26712	0.436158	0	1	DOWN
GO:0030424	axon	cellular_component	7	1	6654	2	26712	0.436158	0	1	DOWN
GO:0080151	positive regulation of salicylic acid mediated signaling pathway	biological_process	8	1	6654	2	26712	0.436158	0	1	DOWN
GO:0004814	arginine-tRNA ligase activity	molecular_function	8	1	6654	2	26712	0.436158	1	0	UP
GO:0008831	dTDP-4-dehydrorhamnose reductase activity	molecular_function	7	1	6654	2	26712	0.436158	0	1	DOWN
GO:0031407	oxylipin metabolic process	biological_process	10	1	6654	2	26712	0.436158	1	0	UP
GO:0071424	rRNA (cytosine-N4-)-methyltransferase activity	molecular_function	8	1	6654	2	26712	0.436158	0	1	DOWN
GO:0047652	allantoate deiminase activity	molecular_function	7	1	6654	2	26712	0.436158	0	1	DOWN
GO:0008290	F-actin capping protein complex	cellular_component	11	1	6654	2	26712	0.436158	0	1	DOWN
GO:0030418	nicotianamine biosynthetic process	biological_process	9	1	6654	2	26712	0.436158	0	1	DOWN
GO:0070626	(S)-2-(5-amino-1-(5-phospho-D-ribosyl)imidazole-4-carboxamido)succinate AMP-lyase (fumarate-forming) activity	molecular_function	7	1	6654	2	26712	0.436158	1	0	UP
GO:0044805	late nucleophagy	biological_process	8	1	6654	2	26712	0.436158	0	1	DOWN
GO:0030242	pexophagy	biological_process	7	1	6654	2	26712	0.436158	0	1	DOWN
GO:0006203	dGTP catabolic process	biological_process	12	1	6654	2	26712	0.436158	0	1	DOWN
GO:0016427	tRNA (cytosine) methyltransferase activity	molecular_function	9	1	6654	2	26712	0.436158	0	1	DOWN
GO:0050567	glutaminyl-tRNA synthase (glutamine-hydrolyzing) activity	molecular_function	7	1	6654	2	26712	0.436158	0	1	DOWN
GO:0071614	linoleic acid epoxygenase activity	molecular_function	6	1	6654	2	26712	0.436158	0	1	DOWN
GO:0015854	guanine transport	biological_process	7	1	6654	2	26712	0.436158	0	1	DOWN
GO:0009715	chalcone biosynthetic process	biological_process	8	1	6654	2	26712	0.436158	1	0	UP
GO:0071493	cellular response to UV-B	biological_process	9	1	6654	2	26712	0.436158	0	1	DOWN
GO:0012502	induction of programmed cell death	biological_process	9	1	6654	2	26712	0.436158	0	1	DOWN
GO:0008287	protein serine/threonine phosphatase complex	cellular_component	5	1	6654	2	26712	0.436158	0	1	DOWN
GO:0015181	arginine transmembrane transporter activity	molecular_function	10	1	6654	2	26712	0.436158	0	1	DOWN
GO:0016594	glycine binding	molecular_function	8	1	6654	2	26712	0.436158	0	1	DOWN
GO:0034755	iron ion transmembrane transport	biological_process	7	1	6654	2	26712	0.436158	1	0	UP
GO:0050085	mannitol 2-dehydrogenase (NADP+) activity	molecular_function	7	1	6654	2	26712	0.436158	0	1	DOWN
GO:0000249	C-22 sterol desaturase activity	molecular_function	7	1	6654	2	26712	0.436158	1	0	UP
GO:2000122	negative regulation of stomatal complex development	biological_process	9	1	6654	2	26712	0.436158	0	1	DOWN
GO:0050242	pyruvate, phosphate dikinase activity	molecular_function	7	1	6654	2	26712	0.436158	0	1	DOWN
GO:0042344	indole glucosinolate catabolic process	biological_process	8	1	6654	2	26712	0.436158	0	1	DOWN
GO:0032012	regulation of ARF protein signal transduction	biological_process	11	1	6654	2	26712	0.436158	0	1	DOWN
GO:0010430	fatty acid omega-oxidation	biological_process	11	1	6654	2	26712	0.436158	0	1	DOWN
GO:0071000	response to magnetism	biological_process	5	1	6654	2	26712	0.436158	0	1	DOWN
GO:0010115	regulation of abscisic acid biosynthetic process	biological_process	10	1	6654	2	26712	0.436158	0	1	DOWN
GO:0019594	mannitol metabolic process	biological_process	8	1	6654	2	26712	0.436158	0	1	DOWN
GO:0031357	integral component of chloroplast inner membrane	cellular_component	16	1	6654	2	26712	0.436158	0	1	DOWN
GO:0031116	positive regulation of microtubule polymerization	biological_process	10	1	6654	2	26712	0.436158	0	1	DOWN
GO:0061062	regulation of nematode larval development	biological_process	9	1	6654	2	26712	0.436158	0	1	DOWN
GO:0000900	translation repressor activity, nucleic acid binding	molecular_function	7	1	6654	2	26712	0.436158	0	1	DOWN
GO:0010623	programmed cell death involved in cell development	biological_process	7	1	6654	2	26712	0.436158	0	1	DOWN
GO:0006998	nuclear envelope organization	biological_process	6	1	6654	2	26712	0.436158	0	1	DOWN
GO:0019867	outer membrane	cellular_component	4	1	6654	2	26712	0.436158	1	0	UP
GO:0042539	hypotonic salinity response	biological_process	7	1	6654	2	26712	0.436158	0	1	DOWN
GO:0048529	magnesium-protoporphyrin IX monomethyl ester (oxidative) cyclase activity	molecular_function	7	1	6654	2	26712	0.436158	0	1	DOWN
GO:1902128	(-)-lariciresinol catabolic process	biological_process	8	1	6654	2	26712	0.436158	1	0	UP
GO:0016595	glutamate binding	molecular_function	8	1	6654	2	26712	0.436158	0	1	DOWN
GO:0004837	tyrosine decarboxylase activity	molecular_function	7	1	6654	2	26712	0.436158	0	1	DOWN
GO:0010116	positive regulation of abscisic acid biosynthetic process	biological_process	11	1	6654	2	26712	0.436158	1	0	UP
GO:0052855	ADP-dependent NAD(P)H-hydrate dehydratase activity	molecular_function	7	1	6654	2	26712	0.436158	1	0	UP
GO:0018160	peptidyl-pyrromethane cofactor linkage	biological_process	9	1	6654	2	26712	0.436158	0	1	DOWN
GO:0052670	geraniol kinase activity	molecular_function	8	1	6654	2	26712	0.436158	1	0	UP
GO:0010186	positive regulation of cellular defense response	biological_process	8	1	6654	2	26712	0.436158	0	1	DOWN
GO:1902358	sulfate transmembrane transport	biological_process	9	1	6654	2	26712	0.436158	0	1	DOWN
GO:0004485	methylcrotonoyl-CoA carboxylase activity	molecular_function	7	1	6654	2	26712	0.436158	1	0	UP
GO:0005712	chiasma	cellular_component	13	1	6654	2	26712	0.436158	0	1	DOWN
GO:1990023	mitotic spindle midzone	cellular_component	11	1	6654	2	26712	0.436158	0	1	DOWN
GO:0015853	adenine transport	biological_process	7	1	6654	2	26712	0.436158	0	1	DOWN
GO:0031938	regulation of chromatin silencing at telomere	biological_process	13	1	6654	2	26712	0.436158	0	1	DOWN
GO:0009063	cellular amino acid catabolic process	biological_process	7	1	6654	2	26712	0.436158	0	1	DOWN
GO:0050275	scopoletin glucosyltransferase activity	molecular_function	8	1	6654	2	26712	0.436158	1	0	UP
GO:0046906	tetrapyrrole binding	molecular_function	5	1	6654	2	26712	0.436158	0	1	DOWN
GO:0055063	sulfate ion homeostasis	biological_process	10	1	6654	2	26712	0.436158	1	0	UP
GO:0006420	arginyl-tRNA aminoacylation	biological_process	13	1	6654	2	26712	0.436158	1	0	UP
GO:0010275	NAD(P)H dehydrogenase complex assembly	biological_process	9	1	6654	2	26712	0.436158	0	1	DOWN
GO:0019354	siroheme biosynthetic process	biological_process	10	1	6654	2	26712	0.436158	1	0	UP
GO:0008836	diaminopimelate decarboxylase activity	molecular_function	7	1	6654	2	26712	0.436158	0	1	DOWN
GO:1902171	regulation of tocopherol cyclase activity	biological_process	7	1	6654	2	26712	0.436158	0	1	DOWN
GO:0042646	plastid nucleoid	cellular_component	12	1	6654	2	26712	0.436158	0	1	DOWN
GO:0051743	red chlorophyll catabolite reductase activity	molecular_function	7	1	6654	2	26712	0.436158	0	1	DOWN
GO:0015226	carnitine transmembrane transporter activity	molecular_function	9	1	6654	2	26712	0.436158	0	1	DOWN
GO:0048244	phytanoyl-CoA dioxygenase activity	molecular_function	7	1	6654	2	26712	0.436158	1	0	UP
GO:0005363	maltose transmembrane transporter activity	molecular_function	9	1	6654	2	26712	0.436158	0	1	DOWN
GO:0070681	glutaminyl-tRNAGln biosynthesis via transamidation	biological_process	12	1	6654	2	26712	0.436158	0	1	DOWN
GO:0004457	lactate dehydrogenase activity	molecular_function	6	1	6654	2	26712	0.436158	1	0	UP
GO:0009583	detection of light stimulus	biological_process	6	1	6654	2	26712	0.436158	0	1	DOWN
GO:0019897	extrinsic component of plasma membrane	cellular_component	7	1	6654	2	26712	0.436158	0	1	DOWN
GO:0043620	regulation of DNA-templated transcription in response to stress	biological_process	12	1	6654	2	26712	0.436158	1	0	UP
GO:0031398	positive regulation of protein ubiquitination	biological_process	12	1	6654	2	26712	0.436158	1	0	UP
GO:0070205	2-succinyl-6-hydroxy-2,4-cyclohexadiene-1-carboxylate synthase activity	molecular_function	6	1	6654	2	26712	0.436158	0	1	DOWN
GO:0010242	oxygen evolving activity	molecular_function	5	1	6654	2	26712	0.436158	0	1	DOWN
GO:0005943	phosphatidylinositol 3-kinase complex, class IA	cellular_component	13	1	6654	2	26712	0.436158	0	1	DOWN
GO:0004046	aminoacylase activity	molecular_function	7	1	6654	2	26712	0.436158	0	1	DOWN
GO:0004142	diacylglycerol cholinephosphotransferase activity	molecular_function	8	1	6654	2	26712	0.436158	0	1	DOWN
GO:0047453	ATP-dependent NAD(P)H-hydrate dehydratase activity	molecular_function	7	1	6654	2	26712	0.436158	1	0	UP
GO:0033840	NDP-glucose-starch glucosyltransferase activity	molecular_function	8	1	6654	2	26712	0.436158	0	1	DOWN
GO:0006584	catecholamine metabolic process	biological_process	6	1	6654	2	26712	0.436158	0	1	DOWN
GO:0019481	L-alanine catabolic process, by transamination	biological_process	12	1	6654	2	26712	0.436158	1	0	UP
GO:0010488	UDP-galactose:N-glycan beta-1,3-galactosyltransferase activity	molecular_function	8	1	6654	2	26712	0.436158	0	1	DOWN
GO:0010074	maintenance of meristem identity	biological_process	10	1	6654	2	26712	0.436158	1	0	UP
GO:0045487	gibberellin catabolic process	biological_process	8	1	6654	2	26712	0.436158	1	0	UP
GO:0048838	release of seed from dormancy	biological_process	7	1	6654	2	26712	0.436158	0	1	DOWN
GO:0005528	FK506 binding	molecular_function	6	8	6654	29	26712	0.438747	0	8	DOWN
GO:0007143	female meiotic division	biological_process	6	2	6654	6	26712	0.463942	0	2	DOWN
GO:0019156	isoamylase activity	molecular_function	5	2	6654	6	26712	0.463942	0	2	DOWN
GO:0009331	glycerol-3-phosphate dehydrogenase complex	cellular_component	9	2	6654	6	26712	0.463942	0	2	DOWN
GO:0004656	procollagen-proline 4-dioxygenase activity	molecular_function	9	2	6654	6	26712	0.463942	2	0	UP
GO:0004067	asparaginase activity	molecular_function	7	2	6654	6	26712	0.463942	2	0	UP
GO:0033619	membrane protein proteolysis	biological_process	7	2	6654	6	26712	0.463942	0	2	DOWN
GO:0015976	carbon utilization	biological_process	4	2	6654	6	26712	0.463942	0	2	DOWN
GO:0048564	photosystem I assembly	biological_process	7	2	6654	6	26712	0.463942	0	2	DOWN
GO:0042500	aspartic endopeptidase activity, intramembrane cleaving	molecular_function	9	2	6654	6	26712	0.463942	0	2	DOWN
GO:0019521	D-gluconate metabolic process	biological_process	10	2	6654	6	26712	0.463942	2	0	UP
GO:0009920	cell plate formation involved in plant-type cell wall biogenesis	biological_process	8	2	6654	6	26712	0.463942	0	2	DOWN
GO:0009682	induced systemic resistance	biological_process	6	2	6654	6	26712	0.463942	0	2	DOWN
GO:0035250	UDP-galactosyltransferase activity	molecular_function	7	2	6654	6	26712	0.463942	0	2	DOWN
GO:2000024	regulation of leaf development	biological_process	10	2	6654	6	26712	0.463942	0	2	DOWN
GO:0018685	alkane 1-monooxygenase activity	molecular_function	7	2	6654	6	26712	0.463942	0	2	DOWN
GO:2001141	regulation of RNA biosynthetic process	biological_process	9	2	6654	6	26712	0.463942	0	2	DOWN
GO:0001053	plastid sigma factor activity	molecular_function	7	2	6654	6	26712	0.463942	0	2	DOWN
GO:0016987	sigma factor activity	molecular_function	6	2	6654	6	26712	0.463942	0	2	DOWN
GO:0006072	glycerol-3-phosphate metabolic process	biological_process	8	2	6654	6	26712	0.463942	0	2	DOWN
GO:0030093	chloroplast photosystem I	cellular_component	14	2	6654	6	26712	0.463942	0	2	DOWN
GO:0045723	positive regulation of fatty acid biosynthetic process	biological_process	11	2	6654	6	26712	0.463942	0	2	DOWN
GO:0004503	monophenol monooxygenase activity	molecular_function	7	2	6654	6	26712	0.463942	0	2	DOWN
GO:0030660	Golgi-associated vesicle membrane	cellular_component	12	2	6654	6	26712	0.463942	0	2	DOWN
GO:0006516	glycoprotein catabolic process	biological_process	7	2	6654	6	26712	0.463942	2	0	UP
GO:0006220	pyrimidine nucleotide metabolic process	biological_process	10	2	6654	6	26712	0.463942	2	0	UP
GO:0051601	exocyst localization	biological_process	8	2	6654	6	26712	0.463942	0	2	DOWN
GO:0071491	cellular response to red light	biological_process	9	2	6654	6	26712	0.463942	0	2	DOWN
GO:0007267	cell-cell signaling	biological_process	6	2	6654	6	26712	0.463942	0	2	DOWN
GO:0046873	metal ion transmembrane transporter activity	molecular_function	9	2	6654	6	26712	0.463942	2	0	UP
GO:0008361	regulation of cell size	biological_process	6	2	6654	6	26712	0.463942	0	2	DOWN
GO:0071490	cellular response to far red light	biological_process	9	2	6654	6	26712	0.463942	0	2	DOWN
GO:0046537	2,3-bisphosphoglycerate-independent phosphoglycerate mutase activity	molecular_function	8	2	6654	6	26712	0.463942	2	0	UP
GO:0000293	ferric-chelate reductase activity	molecular_function	7	2	6654	6	26712	0.463942	0	2	DOWN
GO:0006598	polyamine catabolic process	biological_process	9	2	6654	6	26712	0.463942	2	0	UP
GO:0071556	integral component of lumenal side of endoplasmic reticulum membrane	cellular_component	14	2	6654	6	26712	0.463942	0	2	DOWN
GO:0008798	beta-aspartyl-peptidase activity	molecular_function	9	2	6654	6	26712	0.463942	2	0	UP
GO:0034727	piecemeal microautophagy of nucleus	biological_process	8	2	6654	6	26712	0.463942	0	2	DOWN
GO:1901959	positive regulation of cutin biosynthetic process	biological_process	9	2	6654	6	26712	0.463942	0	2	DOWN
GO:0004612	phosphoenolpyruvate carboxykinase (ATP) activity	molecular_function	8	2	6654	6	26712	0.463942	2	0	UP
GO:0051510	regulation of unidimensional cell growth	biological_process	7	2	6654	6	26712	0.463942	0	2	DOWN
GO:0004618	phosphoglycerate kinase activity	molecular_function	7	2	6654	6	26712	0.463942	2	0	UP
GO:0046592	polyamine oxidase activity	molecular_function	7	2	6654	6	26712	0.463942	2	0	UP
GO:0036263	L-DOPA monooxygenase activity	molecular_function	8	2	6654	6	26712	0.463942	0	2	DOWN
GO:0009652	thigmotropism	biological_process	6	2	6654	6	26712	0.463942	0	2	DOWN
GO:0018401	peptidyl-proline hydroxylation to 4-hydroxy-L-proline	biological_process	9	2	6654	6	26712	0.463942	2	0	UP
GO:0046855	inositol phosphate dephosphorylation	biological_process	10	3	6654	10	26712	0.471721	0	3	DOWN
GO:0080019	fatty-acyl-CoA reductase (alcohol-forming) activity	molecular_function	7	3	6654	10	26712	0.471721	0	3	DOWN
GO:0010271	regulation of chlorophyll catabolic process	biological_process	10	3	6654	10	26712	0.471721	0	3	DOWN
GO:0048281	inflorescence morphogenesis	biological_process	5	3	6654	10	26712	0.471721	0	3	DOWN
GO:0018298	protein-chromophore linkage	biological_process	8	3	6654	10	26712	0.471721	0	3	DOWN
GO:0010264	myo-inositol hexakisphosphate biosynthetic process	biological_process	10	3	6654	10	26712	0.471721	0	3	DOWN
GO:0070042	rRNA (uridine-N3-)-methyltransferase activity	molecular_function	8	4	6654	14	26712	0.475508	0	4	DOWN
GO:0000373	Group II intron splicing	biological_process	13	4	6654	14	26712	0.475508	0	4	DOWN
GO:0043255	regulation of carbohydrate biosynthetic process	biological_process	7	5	6654	18	26712	0.477774	0	5	DOWN
GO:0007017	microtubule-based process	biological_process	5	11	6654	42	26712	0.482604	0	11	DOWN
GO:0009086	methionine biosynthetic process	biological_process	9	4	6654	15	26712	0.535505	4	0	UP
GO:0004617	phosphoglycerate dehydrogenase activity	molecular_function	7	3	6654	11	26712	0.542042	3	0	UP
GO:0009070	serine family amino acid biosynthetic process	biological_process	9	3	6654	11	26712	0.542042	3	0	UP
GO:0009142	nucleoside triphosphate biosynthetic process	biological_process	9	3	6654	11	26712	0.542042	3	0	UP
GO:0016161	beta-amylase activity	molecular_function	8	3	6654	11	26712	0.542042	0	3	DOWN
GO:0043068	positive regulation of programmed cell death	biological_process	8	3	6654	11	26712	0.542042	0	3	DOWN
GO:0034219	carbohydrate transmembrane transport	biological_process	6	3	6654	11	26712	0.542042	3	0	UP
GO:0032300	mismatch repair complex	cellular_component	7	3	6654	11	26712	0.542042	0	3	DOWN
GO:0034485	phosphatidylinositol-3,4,5-trisphosphate 5-phosphatase activity	molecular_function	10	3	6654	11	26712	0.542042	0	3	DOWN
GO:0030234	enzyme regulator activity	molecular_function	3	3	6654	11	26712	0.542042	0	3	DOWN
GO:0031418	L-ascorbic acid binding	molecular_function	6	3	6654	11	26712	0.542042	3	0	UP
GO:0005960	glycine cleavage complex	cellular_component	9	2	6654	7	26712	0.552835	0	2	DOWN
GO:0071483	cellular response to blue light	biological_process	8	2	6654	7	26712	0.552835	0	2	DOWN
GO:0017196	N-terminal peptidyl-methionine acetylation	biological_process	10	2	6654	7	26712	0.552835	2	0	UP
GO:0046470	phosphatidylcholine metabolic process	biological_process	9	2	6654	7	26712	0.552835	0	2	DOWN
GO:0043169	cation binding	molecular_function	5	2	6654	7	26712	0.552835	0	2	DOWN
GO:0000179	rRNA (adenine-N6,N6-)-dimethyltransferase activity	molecular_function	8	2	6654	7	26712	0.552835	0	2	DOWN
GO:0009690	cytokinin metabolic process	biological_process	7	2	6654	7	26712	0.552835	0	2	DOWN
GO:0045261	proton-transporting ATP synthase complex, catalytic core F(1)	cellular_component	8	2	6654	7	26712	0.552835	0	2	DOWN
GO:0009927	histidine phosphotransfer kinase activity	molecular_function	7	2	6654	7	26712	0.552835	0	2	DOWN
GO:0045552	dihydrokaempferol 4-reductase activity	molecular_function	7	2	6654	7	26712	0.552835	0	2	DOWN
GO:0033345	asparagine catabolic process via L-aspartate	biological_process	9	2	6654	7	26712	0.552835	2	0	UP
GO:0097308	cellular response to farnesol	biological_process	8	2	6654	7	26712	0.552835	0	2	DOWN
GO:0010508	positive regulation of autophagy	biological_process	8	2	6654	7	26712	0.552835	0	2	DOWN
GO:0008083	growth factor activity	molecular_function	6	2	6654	7	26712	0.552835	2	0	UP
GO:0090342	regulation of cell aging	biological_process	6	2	6654	7	26712	0.552835	0	2	DOWN
GO:0090447	glycerol-3-phosphate 2-O-acyltransferase activity	molecular_function	8	2	6654	7	26712	0.552835	0	2	DOWN
GO:0034388	Pwp2p-containing subcomplex of 90S preribosome	cellular_component	10	2	6654	7	26712	0.552835	2	0	UP
GO:0060548	negative regulation of cell death	biological_process	7	2	6654	7	26712	0.552835	0	2	DOWN
GO:0030981	cortical microtubule cytoskeleton	cellular_component	12	2	6654	7	26712	0.552835	0	2	DOWN
GO:0006811	ion transport	biological_process	5	10	6654	40	26712	0.55534	0	10	DOWN
GO:0009741	response to brassinosteroid	biological_process	6	9	6654	36	26712	0.558851	0	9	DOWN
GO:0043527	tRNA methyltransferase complex	cellular_component	9	1	6654	3	26712	0.576623	0	1	DOWN
GO:0008324	cation transmembrane transporter activity	molecular_function	7	1	6654	3	26712	0.576623	0	1	DOWN
GO:0044262	cellular carbohydrate metabolic process	biological_process	5	1	6654	3	26712	0.576623	0	1	DOWN
GO:0008373	sialyltransferase activity	molecular_function	6	1	6654	3	26712	0.576623	0	1	DOWN
GO:0003951	NAD+ kinase activity	molecular_function	7	1	6654	3	26712	0.576623	1	0	UP
GO:0043295	glutathione binding	molecular_function	7	1	6654	3	26712	0.576623	1	0	UP
GO:0008478	pyridoxal kinase activity	molecular_function	7	1	6654	3	26712	0.576623	1	0	UP
GO:0005997	xylulose metabolic process	biological_process	9	1	6654	3	26712	0.576623	0	1	DOWN
GO:0004000	adenosine deaminase activity	molecular_function	7	1	6654	3	26712	0.576623	0	1	DOWN
GO:1902074	response to salt	biological_process	5	1	6654	3	26712	0.576623	1	0	UP
GO:0017022	myosin binding	molecular_function	6	1	6654	3	26712	0.576623	0	1	DOWN
GO:0001578	microtubule bundle formation	biological_process	7	1	6654	3	26712	0.576623	0	1	DOWN
GO:0009156	ribonucleoside monophosphate biosynthetic process	biological_process	10	1	6654	3	26712	0.576623	1	0	UP
GO:0045793	positive regulation of cell size	biological_process	7	1	6654	3	26712	0.576623	0	1	DOWN
GO:0045017	glycerolipid biosynthetic process	biological_process	6	1	6654	3	26712	0.576623	0	1	DOWN
GO:0006040	amino sugar metabolic process	biological_process	6	1	6654	3	26712	0.576623	1	0	UP
GO:0000214	tRNA-intron endonuclease complex	cellular_component	11	1	6654	3	26712	0.576623	1	0	UP
GO:0015691	cadmium ion transport	biological_process	9	1	6654	3	26712	0.576623	0	1	DOWN
GO:0055046	microgametogenesis	biological_process	8	1	6654	3	26712	0.576623	0	1	DOWN
GO:0018858	benzoate-CoA ligase activity	molecular_function	7	1	6654	3	26712	0.576623	0	1	DOWN
GO:0004809	tRNA (guanine-N2-)-methyltransferase activity	molecular_function	8	1	6654	3	26712	0.576623	0	1	DOWN
GO:0080153	negative regulation of reductive pentose-phosphate cycle	biological_process	10	1	6654	3	26712	0.576623	0	1	DOWN
GO:0032776	DNA methylation on cytosine	biological_process	12	1	6654	3	26712	0.576623	0	1	DOWN
GO:0046027	phospholipid:diacylglycerol acyltransferase activity	molecular_function	9	1	6654	3	26712	0.576623	0	1	DOWN
GO:0006545	glycine biosynthetic process	biological_process	10	1	6654	3	26712	0.576623	0	1	DOWN
GO:2000067	regulation of root morphogenesis	biological_process	10	1	6654	3	26712	0.576623	0	1	DOWN
GO:0006982	response to lipid hydroperoxide	biological_process	7	1	6654	3	26712	0.576623	1	0	UP
GO:1900368	regulation of RNA interference	biological_process	12	1	6654	3	26712	0.576623	0	1	DOWN
GO:0046509	1,2-diacylglycerol 3-beta-galactosyltransferase activity	molecular_function	8	1	6654	3	26712	0.576623	0	1	DOWN
GO:0009955	adaxial/abaxial pattern specification	biological_process	8	1	6654	3	26712	0.576623	0	1	DOWN
GO:1900370	positive regulation of RNA interference	biological_process	13	1	6654	3	26712	0.576623	0	1	DOWN
GO:0010335	response to non-ionic osmotic stress	biological_process	6	1	6654	3	26712	0.576623	1	0	UP
GO:0060968	regulation of gene silencing	biological_process	10	1	6654	3	26712	0.576623	0	1	DOWN
GO:0042816	vitamin B6 metabolic process	biological_process	7	1	6654	3	26712	0.576623	1	0	UP
GO:0010317	pyrophosphate-dependent phosphofructokinase complex, alpha-subunit complex	cellular_component	6	1	6654	3	26712	0.576623	0	1	DOWN
GO:0009528	plastid inner membrane	cellular_component	13	1	6654	3	26712	0.576623	0	1	DOWN
GO:0008444	CDP-diacylglycerol-glycerol-3-phosphate 3-phosphatidyltransferase activity	molecular_function	8	1	6654	3	26712	0.576623	0	1	DOWN
GO:0031143	pseudopodium	cellular_component	6	1	6654	3	26712	0.576623	0	1	DOWN
GO:1901698	response to nitrogen compound	biological_process	5	1	6654	3	26712	0.576623	1	0	UP
GO:0008934	inositol monophosphate 1-phosphatase activity	molecular_function	10	1	6654	3	26712	0.576623	0	1	DOWN
GO:0008153	para-aminobenzoic acid biosynthetic process	biological_process	9	1	6654	3	26712	0.576623	1	0	UP
GO:0004445	inositol-polyphosphate 5-phosphatase activity	molecular_function	10	1	6654	3	26712	0.576623	0	1	DOWN
GO:0031564	transcription antitermination	biological_process	12	1	6654	3	26712	0.576623	1	0	UP
GO:0008843	endochitinase activity	molecular_function	8	1	6654	3	26712	0.576623	1	0	UP
GO:0046972	histone acetyltransferase activity (H4-K16 specific)	molecular_function	12	1	6654	3	26712	0.576623	0	1	DOWN
GO:0003868	4-hydroxyphenylpyruvate dioxygenase activity	molecular_function	7	1	6654	3	26712	0.576623	1	0	UP
GO:0006650	glycerophospholipid metabolic process	biological_process	8	1	6654	3	26712	0.576623	0	1	DOWN
GO:0000213	tRNA-intron endonuclease activity	molecular_function	10	1	6654	3	26712	0.576623	1	0	UP
GO:0071277	cellular response to calcium ion	biological_process	8	1	6654	3	26712	0.576623	0	1	DOWN
GO:0003934	GTP cyclohydrolase I activity	molecular_function	9	1	6654	3	26712	0.576623	1	0	UP
GO:0009650	UV protection	biological_process	8	1	6654	3	26712	0.576623	0	1	DOWN
GO:0008685	2-C-methyl-D-erythritol 2,4-cyclodiphosphate synthase activity	molecular_function	6	1	6654	3	26712	0.576623	1	0	UP
GO:0050113	inositol oxygenase activity	molecular_function	6	1	6654	3	26712	0.576623	1	0	UP
GO:0052635	C-20 gibberellin 2-beta-dioxygenase activity	molecular_function	8	1	6654	3	26712	0.576623	1	0	UP
GO:0043666	regulation of phosphoprotein phosphatase activity	biological_process	10	1	6654	3	26712	0.576623	0	1	DOWN
GO:0090391	granum assembly	biological_process	7	1	6654	3	26712	0.576623	0	1	DOWN
GO:0045300	acyl-[acyl-carrier-protein] desaturase activity	molecular_function	7	1	6654	3	26712	0.576623	1	0	UP
GO:0009234	menaquinone biosynthetic process	biological_process	8	1	6654	3	26712	0.576623	0	1	DOWN
GO:0043995	histone acetyltransferase activity (H4-K5 specific)	molecular_function	12	1	6654	3	26712	0.576623	0	1	DOWN
GO:0032133	chromosome passenger complex	cellular_component	12	1	6654	3	26712	0.576623	1	0	UP
GO:0007154	cell communication	biological_process	5	1	6654	3	26712	0.576623	0	1	DOWN
GO:0050830	defense response to Gram-positive bacterium	biological_process	8	1	6654	3	26712	0.576623	0	1	DOWN
GO:0015099	nickel cation transmembrane transporter activity	molecular_function	11	1	6654	3	26712	0.576623	1	0	UP
GO:0004383	guanylate cyclase activity	molecular_function	5	1	6654	3	26712	0.576623	0	1	DOWN
GO:0060966	regulation of gene silencing by RNA	biological_process	11	1	6654	3	26712	0.576623	0	1	DOWN
GO:0000324	fungal-type vacuole	cellular_component	11	1	6654	3	26712	0.576623	1	0	UP
GO:0071454	cellular response to anoxia	biological_process	6	1	6654	3	26712	0.576623	0	1	DOWN
GO:0019310	inositol catabolic process	biological_process	7	1	6654	3	26712	0.576623	1	0	UP
GO:0045739	positive regulation of DNA repair	biological_process	11	1	6654	3	26712	0.576623	1	0	UP
GO:0045461	sterigmatocystin biosynthetic process	biological_process	7	1	6654	3	26712	0.576623	0	1	DOWN
GO:0046208	spermine catabolic process	biological_process	10	1	6654	3	26712	0.576623	1	0	UP
GO:0003979	UDP-glucose 6-dehydrogenase activity	molecular_function	7	1	6654	3	26712	0.576623	0	1	DOWN
GO:0045338	farnesyl diphosphate metabolic process	biological_process	8	1	6654	3	26712	0.576623	0	1	DOWN
GO:0071494	cellular response to UV-C	biological_process	9	1	6654	3	26712	0.576623	0	1	DOWN
GO:0010179	IAA-Ala conjugate hydrolase activity	molecular_function	7	1	6654	3	26712	0.576623	0	1	DOWN
GO:0097503	sialylation	biological_process	7	1	6654	3	26712	0.576623	0	1	DOWN
GO:0008216	spermidine metabolic process	biological_process	9	1	6654	3	26712	0.576623	0	1	DOWN
GO:0008265	Mo-molybdopterin cofactor sulfurase activity	molecular_function	4	1	6654	3	26712	0.576623	1	0	UP
GO:0045121	membrane raft	cellular_component	5	1	6654	3	26712	0.576623	0	1	DOWN
GO:0034470	ncRNA processing	biological_process	10	1	6654	3	26712	0.576623	1	0	UP
GO:0008417	fucosyltransferase activity	molecular_function	7	1	6654	3	26712	0.576623	0	1	DOWN
GO:0009152	purine ribonucleotide biosynthetic process	biological_process	11	1	6654	3	26712	0.576623	0	1	DOWN
GO:2000694	regulation of phragmoplast microtubule organization	biological_process	8	1	6654	3	26712	0.576623	0	1	DOWN
GO:0006661	phosphatidylinositol biosynthetic process	biological_process	8	1	6654	3	26712	0.576623	0	1	DOWN
GO:0071344	diphosphate metabolic process	biological_process	7	1	6654	3	26712	0.576623	0	1	DOWN
GO:0019323	pentose catabolic process	biological_process	8	1	6654	3	26712	0.576623	0	1	DOWN
GO:0052634	C-19 gibberellin 2-beta-dioxygenase activity	molecular_function	8	1	6654	3	26712	0.576623	1	0	UP
GO:0048219	inter-Golgi cisterna vesicle-mediated transport	biological_process	7	1	6654	3	26712	0.576623	0	1	DOWN
GO:0007638	mechanosensory behavior	biological_process	5	1	6654	3	26712	0.576623	0	1	DOWN
GO:1901371	regulation of leaf morphogenesis	biological_process	10	1	6654	3	26712	0.576623	0	1	DOWN
GO:0019877	diaminopimelate biosynthetic process	biological_process	8	1	6654	3	26712	0.576623	0	1	DOWN
GO:0042548	regulation of photosynthesis, light reaction	biological_process	7	1	6654	3	26712	0.576623	0	1	DOWN
GO:0007093	mitotic cell cycle checkpoint	biological_process	10	1	6654	3	26712	0.576623	1	0	UP
GO:0035563	positive regulation of chromatin binding	biological_process	7	1	6654	3	26712	0.576623	0	1	DOWN
GO:0080026	response to indolebutyric acid	biological_process	7	1	6654	3	26712	0.576623	1	0	UP
GO:0006469	negative regulation of protein kinase activity	biological_process	11	1	6654	3	26712	0.576623	0	1	DOWN
GO:0009263	deoxyribonucleotide biosynthetic process	biological_process	10	1	6654	3	26712	0.576623	0	1	DOWN
GO:0006741	NADP biosynthetic process	biological_process	12	1	6654	3	26712	0.576623	1	0	UP
GO:0009629	response to gravity	biological_process	5	1	6654	3	26712	0.576623	0	1	DOWN
GO:0001072	transcription antitermination factor activity, RNA binding	molecular_function	5	1	6654	3	26712	0.576623	1	0	UP
GO:0000372	Group I intron splicing	biological_process	13	1	6654	3	26712	0.576623	0	1	DOWN
GO:0005460	UDP-glucose transmembrane transporter activity	molecular_function	9	1	6654	3	26712	0.576623	1	0	UP
GO:0000126	transcription factor TFIIIB complex	cellular_component	10	1	6654	3	26712	0.576623	0	1	DOWN
GO:0008746	NAD(P)+ transhydrogenase activity	molecular_function	7	1	6654	3	26712	0.576623	0	1	DOWN
GO:0015940	pantothenate biosynthetic process	biological_process	8	1	6654	3	26712	0.576623	1	0	UP
GO:0000003	reproduction	biological_process	3	1	6654	3	26712	0.576623	1	0	UP
GO:0090153	regulation of sphingolipid biosynthetic process	biological_process	8	1	6654	3	26712	0.576623	0	1	DOWN
GO:0048589	developmental growth	biological_process	5	1	6654	3	26712	0.576623	1	0	UP
GO:0072387	flavin adenine dinucleotide metabolic process	biological_process	10	1	6654	3	26712	0.576623	0	1	DOWN
GO:0010266	response to vitamin B1	biological_process	9	1	6654	3	26712	0.576623	0	1	DOWN
GO:0003879	ATP phosphoribosyltransferase activity	molecular_function	7	1	6654	3	26712	0.576623	0	1	DOWN
GO:0035335	peptidyl-tyrosine dephosphorylation	biological_process	9	1	6654	3	26712	0.576623	0	1	DOWN
GO:0035434	copper ion transmembrane transport	biological_process	7	1	6654	3	26712	0.576623	0	1	DOWN
GO:0016653	oxidoreductase activity, acting on NAD(P)H, heme protein as acceptor	molecular_function	6	1	6654	3	26712	0.576623	1	0	UP
GO:0006880	intracellular sequestering of iron ion	biological_process	12	1	6654	3	26712	0.576623	0	1	DOWN
GO:0019222	regulation of metabolic process	biological_process	4	1	6654	3	26712	0.576623	1	0	UP
GO:0032465	regulation of cytokinesis	biological_process	8	1	6654	3	26712	0.576623	1	0	UP
GO:0055035	plastid thylakoid membrane	cellular_component	12	1	6654	3	26712	0.576623	0	1	DOWN
GO:0032541	cortical endoplasmic reticulum	cellular_component	12	1	6654	3	26712	0.576623	1	0	UP
GO:0003938	IMP dehydrogenase activity	molecular_function	7	1	6654	3	26712	0.576623	0	1	DOWN
GO:0046608	carotenoid isomerase activity	molecular_function	6	1	6654	3	26712	0.576623	0	1	DOWN
GO:0008809	carnitine racemase activity	molecular_function	7	1	6654	3	26712	0.576623	1	0	UP
GO:0070207	protein homotrimerization	biological_process	10	1	6654	3	26712	0.576623	1	0	UP
GO:0045227	capsule polysaccharide biosynthetic process	biological_process	9	1	6654	3	26712	0.576623	0	1	DOWN
GO:0000910	cytokinesis	biological_process	7	1	6654	3	26712	0.576623	0	1	DOWN
GO:0016487	farnesol metabolic process	biological_process	9	1	6654	3	26712	0.576623	1	0	UP
GO:0080056	petal vascular tissue pattern formation	biological_process	9	1	6654	3	26712	0.576623	1	0	UP
GO:0004750	ribulose-phosphate 3-epimerase activity	molecular_function	7	1	6654	3	26712	0.576623	0	1	DOWN
GO:0009905	ent-copalyl diphosphate synthase activity	molecular_function	6	1	6654	3	26712	0.576623	0	1	DOWN
GO:0006641	triglyceride metabolic process	biological_process	8	1	6654	3	26712	0.576623	1	0	UP
GO:0051179	localization	biological_process	3	1	6654	3	26712	0.576623	0	1	DOWN
GO:0022821	potassium ion antiporter activity	molecular_function	8	1	6654	3	26712	0.576623	0	1	DOWN
GO:0000780	condensed nuclear chromosome, centromeric region	cellular_component	13	1	6654	3	26712	0.576623	1	0	UP
GO:0052033	pathogen-associated molecular pattern dependent induction by symbiont of host innate immune response	biological_process	10	1	6654	3	26712	0.576623	0	1	DOWN
GO:0010493	Lewis a epitope biosynthetic process	biological_process	8	1	6654	3	26712	0.576623	0	1	DOWN
GO:0033358	UDP-L-arabinose biosynthetic process	biological_process	11	1	6654	3	26712	0.576623	0	1	DOWN
GO:0042834	peptidoglycan binding	molecular_function	6	1	6654	3	26712	0.576623	1	0	UP
GO:0009967	positive regulation of signal transduction	biological_process	8	1	6654	3	26712	0.576623	1	0	UP
GO:0006212	uracil catabolic process	biological_process	11	1	6654	3	26712	0.576623	1	0	UP
GO:0008441	3'(2'),5'-bisphosphate nucleotidase activity	molecular_function	9	1	6654	3	26712	0.576623	1	0	UP
GO:1990298	bub1-bub3 complex	cellular_component	5	1	6654	3	26712	0.576623	1	0	UP
GO:0043996	histone acetyltransferase activity (H4-K8 specific)	molecular_function	12	1	6654	3	26712	0.576623	0	1	DOWN
GO:0042781	3'-tRNA processing endoribonuclease activity	molecular_function	10	1	6654	3	26712	0.576623	1	0	UP
GO:0015675	nickel cation transport	biological_process	9	1	6654	3	26712	0.576623	1	0	UP
GO:0004848	ureidoglycolate hydrolase activity	molecular_function	7	1	6654	3	26712	0.576623	0	1	DOWN
GO:0007020	microtubule nucleation	biological_process	7	1	6654	3	26712	0.576623	0	1	DOWN
GO:0005078	MAP-kinase scaffold activity	molecular_function	5	1	6654	3	26712	0.576623	1	0	UP
GO:0036381	pyridoxal 5'-phosphate synthase (glutamine hydrolysing) activity	molecular_function	7	1	6654	3	26712	0.576623	1	0	UP
GO:0004715	non-membrane spanning protein tyrosine kinase activity	molecular_function	9	1	6654	3	26712	0.576623	0	1	DOWN
GO:0010334	sesquiterpene synthase activity	molecular_function	8	1	6654	3	26712	0.576623	0	1	DOWN
GO:0001525	angiogenesis	biological_process	10	1	6654	3	26712	0.576623	0	1	DOWN
GO:0031252	cell leading edge	cellular_component	5	1	6654	3	26712	0.576623	0	1	DOWN
GO:0004198	calcium-dependent cysteine-type endopeptidase activity	molecular_function	9	1	6654	3	26712	0.576623	1	0	UP
GO:0000183	chromatin silencing at rDNA	biological_process	14	1	6654	3	26712	0.576623	1	0	UP
GO:0019483	beta-alanine biosynthetic process	biological_process	8	1	6654	3	26712	0.576623	1	0	UP
GO:0031616	spindle pole centrosome	cellular_component	10	1	6654	3	26712	0.576623	1	0	UP
GO:0010617	circadian regulation of calcium ion oscillation	biological_process	12	1	6654	3	26712	0.576623	0	1	DOWN
GO:0004792	thiosulfate sulfurtransferase activity	molecular_function	7	1	6654	3	26712	0.576623	1	0	UP
GO:0051090	regulation of sequence-specific DNA binding transcription factor activity	biological_process	12	1	6654	3	26712	0.576623	1	0	UP
GO:0016231	beta-N-acetylglucosaminidase activity	molecular_function	9	1	6654	3	26712	0.576623	1	0	UP
GO:0031567	mitotic cell size control checkpoint	biological_process	11	1	6654	3	26712	0.576623	0	1	DOWN
GO:0016004	phospholipase activator activity	molecular_function	6	1	6654	3	26712	0.576623	1	0	UP
GO:0080024	indolebutyric acid metabolic process	biological_process	7	1	6654	3	26712	0.576623	1	0	UP
GO:0000737	DNA catabolic process, endonucleolytic	biological_process	9	1	6654	3	26712	0.576623	0	1	DOWN
GO:0052658	inositol-1,4,5-trisphosphate 5-phosphatase activity	molecular_function	10	1	6654	3	26712	0.576623	0	1	DOWN
GO:0006065	UDP-glucuronate biosynthetic process	biological_process	11	1	6654	3	26712	0.576623	0	1	DOWN
GO:0072546	ER membrane protein complex	cellular_component	14	1	6654	3	26712	0.576623	1	0	UP
GO:0004748	ribonucleoside-diphosphate reductase activity, thioredoxin disulfide as acceptor	molecular_function	7	1	6654	3	26712	0.576623	0	1	DOWN
GO:0071360	cellular response to exogenous dsRNA	biological_process	9	1	6654	3	26712	0.576623	0	1	DOWN
GO:0008176	tRNA (guanine-N7-)-methyltransferase activity	molecular_function	10	1	6654	3	26712	0.576623	0	1	DOWN
GO:0071421	manganese ion transmembrane transport	biological_process	7	1	6654	3	26712	0.576623	0	1	DOWN
GO:0004729	oxygen-dependent protoporphyrinogen oxidase activity	molecular_function	7	1	6654	3	26712	0.576623	0	1	DOWN
GO:0016765	transferase activity, transferring alkyl or aryl (other than methyl) groups	molecular_function	5	1	6654	3	26712	0.576623	0	1	DOWN
GO:0050521	alpha-glucan, water dikinase activity	molecular_function	7	1	6654	3	26712	0.576623	1	0	UP
GO:0048032	galacturonate binding	molecular_function	6	1	6654	3	26712	0.576623	0	1	DOWN
GO:0071949	FAD binding	molecular_function	7	1	6654	3	26712	0.576623	0	1	DOWN
GO:0080057	sepal vascular tissue pattern formation	biological_process	9	1	6654	3	26712	0.576623	1	0	UP
GO:0000379	tRNA-type intron splice site recognition and cleavage	biological_process	10	1	6654	3	26712	0.576623	1	0	UP
GO:0009509	chromoplast	cellular_component	10	1	6654	3	26712	0.576623	0	1	DOWN
GO:0005261	cation channel activity	molecular_function	9	1	6654	3	26712	0.576623	0	1	DOWN
GO:0006784	heme a biosynthetic process	biological_process	10	1	6654	3	26712	0.576623	1	0	UP
GO:0090577	RNA polymerase IV transcription factor complex	cellular_component	9	1	6654	3	26712	0.576623	0	1	DOWN
GO:0003977	UDP-N-acetylglucosamine diphosphorylase activity	molecular_function	8	1	6654	3	26712	0.576623	0	1	DOWN
GO:0052659	inositol-1,3,4,5-tetrakisphosphate 5-phosphatase activity	molecular_function	10	1	6654	3	26712	0.576623	0	1	DOWN
GO:0005971	ribonucleoside-diphosphate reductase complex	cellular_component	9	1	6654	3	26712	0.576623	0	1	DOWN
GO:0006875	cellular metal ion homeostasis	biological_process	9	1	6654	3	26712	0.576623	1	0	UP
GO:0032502	developmental process	biological_process	3	4	6654	16	26712	0.59182	0	4	DOWN
GO:0009508	plastid chromosome	cellular_component	10	4	6654	16	26712	0.59182	0	4	DOWN
GO:0010304	PSII associated light-harvesting complex II catabolic process	biological_process	8	4	6654	16	26712	0.59182	0	4	DOWN
GO:0010027	thylakoid membrane organization	biological_process	7	9	6654	37	26712	0.595564	0	9	DOWN
GO:0000226	microtubule cytoskeleton organization	biological_process	6	8	6654	33	26712	0.601678	0	8	DOWN
GO:0005216	ion channel activity	molecular_function	8	3	6654	12	26712	0.60658	0	3	DOWN
GO:0043069	negative regulation of programmed cell death	biological_process	8	3	6654	12	26712	0.60658	0	3	DOWN
GO:0009959	negative gravitropism	biological_process	7	3	6654	12	26712	0.60658	0	3	DOWN
GO:0015144	carbohydrate transmembrane transporter activity	molecular_function	6	3	6654	12	26712	0.60658	3	0	UP
GO:0051131	chaperone-mediated protein complex assembly	biological_process	9	3	6654	12	26712	0.60658	3	0	UP
GO:0071577	zinc II ion transmembrane transport	biological_process	7	3	6654	12	26712	0.60658	3	0	UP
GO:0006366	transcription from RNA polymerase II promoter	biological_process	11	7	6654	29	26712	0.60896	0	7	DOWN
GO:0009574	preprophase band	cellular_component	9	6	6654	25	26712	0.617851	0	6	DOWN
GO:0009672	auxin:proton symporter activity	molecular_function	9	2	6654	8	26712	0.630711	0	2	DOWN
GO:0005415	nucleoside:sodium symporter activity	molecular_function	10	2	6654	8	26712	0.630711	2	0	UP
GO:0008863	formate dehydrogenase (NAD+) activity	molecular_function	7	2	6654	8	26712	0.630711	2	0	UP
GO:0048768	root hair cell tip growth	biological_process	8	2	6654	8	26712	0.630711	0	2	DOWN
GO:1990136	linoleate 9S-lipoxygenase activity	molecular_function	7	2	6654	8	26712	0.630711	0	2	DOWN
GO:0051604	protein maturation	biological_process	6	2	6654	8	26712	0.630711	2	0	UP
GO:0010021	amylopectin biosynthetic process	biological_process	7	2	6654	8	26712	0.630711	0	2	DOWN
GO:0042183	formate catabolic process	biological_process	9	2	6654	8	26712	0.630711	2	0	UP
GO:0009616	virus induced gene silencing	biological_process	6	2	6654	8	26712	0.630711	0	2	DOWN
GO:0010440	stomatal lineage progression	biological_process	6	2	6654	8	26712	0.630711	0	2	DOWN
GO:0016655	oxidoreductase activity, acting on NAD(P)H, quinone or similar compound as acceptor	molecular_function	6	2	6654	8	26712	0.630711	0	2	DOWN
GO:0005086	ARF guanyl-nucleotide exchange factor activity	molecular_function	4	2	6654	8	26712	0.630711	0	2	DOWN
GO:0015491	cation:cation antiporter activity	molecular_function	9	2	6654	8	26712	0.630711	0	2	DOWN
GO:0004360	glutamine-fructose-6-phosphate transaminase (isomerizing) activity	molecular_function	8	2	6654	8	26712	0.630711	2	0	UP
GO:0032957	inositol trisphosphate metabolic process	biological_process	8	2	6654	8	26712	0.630711	0	2	DOWN
GO:0072686	mitotic spindle	cellular_component	10	2	6654	8	26712	0.630711	0	2	DOWN
GO:0005875	microtubule associated complex	cellular_component	11	4	6654	17	26712	0.643865	0	4	DOWN
GO:0048467	gynoecium development	biological_process	6	4	6654	17	26712	0.643865	0	4	DOWN
GO:0030659	cytoplasmic vesicle membrane	cellular_component	11	3	6654	13	26712	0.664735	0	3	DOWN
GO:0042651	thylakoid membrane	cellular_component	9	3	6654	13	26712	0.664735	0	3	DOWN
GO:0072593	reactive oxygen species metabolic process	biological_process	5	3	6654	13	26712	0.664735	0	3	DOWN
GO:0097027	ubiquitin-protein transferase activator activity	molecular_function	6	3	6654	13	26712	0.664735	0	3	DOWN
GO:0010997	anaphase-promoting complex binding	molecular_function	6	3	6654	13	26712	0.664735	0	3	DOWN
GO:0006487	protein N-linked glycosylation	biological_process	9	5	6654	22	26712	0.67312	0	5	DOWN
GO:0043190	ATP-binding cassette (ABC) transporter complex	cellular_component	6	1	6654	4	26712	0.682099	1	0	UP
GO:0016810	hydrolase activity, acting on carbon-nitrogen (but not peptide) bonds	molecular_function	5	1	6654	4	26712	0.682099	1	0	UP
GO:0004657	proline dehydrogenase activity	molecular_function	6	1	6654	4	26712	0.682099	0	1	DOWN
GO:0050311	sulfite reductase (ferredoxin) activity	molecular_function	7	1	6654	4	26712	0.682099	1	0	UP
GO:0047912	galacturonokinase activity	molecular_function	7	1	6654	4	26712	0.682099	1	0	UP
GO:0006562	proline catabolic process	biological_process	10	1	6654	4	26712	0.682099	0	1	DOWN
GO:0000455	enzyme-directed rRNA pseudouridine synthesis	biological_process	14	1	6654	4	26712	0.682099	0	1	DOWN
GO:0034517	ribophagy	biological_process	7	1	6654	4	26712	0.682099	0	1	DOWN
GO:0070878	primary miRNA binding	molecular_function	7	1	6654	4	26712	0.682099	1	0	UP
GO:2000027	regulation of organ morphogenesis	biological_process	9	1	6654	4	26712	0.682099	0	1	DOWN
GO:1900425	negative regulation of defense response to bacterium	biological_process	9	1	6654	4	26712	0.682099	1	0	UP
GO:0046467	membrane lipid biosynthetic process	biological_process	6	1	6654	4	26712	0.682099	0	1	DOWN
GO:0008599	protein phosphatase type 1 regulator activity	molecular_function	6	1	6654	4	26712	0.682099	0	1	DOWN
GO:0033512	L-lysine catabolic process to acetyl-CoA via saccharopine	biological_process	13	1	6654	4	26712	0.682099	1	0	UP
GO:0033587	shikimate biosynthetic process	biological_process	9	1	6654	4	26712	0.682099	1	0	UP
GO:0015485	cholesterol binding	molecular_function	7	1	6654	4	26712	0.682099	0	1	DOWN
GO:0000478	endonucleolytic cleavage involved in rRNA processing	biological_process	13	1	6654	4	26712	0.682099	1	0	UP
GO:0031118	rRNA pseudouridine synthesis	biological_process	13	1	6654	4	26712	0.682099	1	0	UP
GO:0071629	cytoplasm-associated proteasomal ubiquitin-dependent protein catabolic process	biological_process	11	1	6654	4	26712	0.682099	0	1	DOWN
GO:0009882	blue light photoreceptor activity	molecular_function	6	1	6654	4	26712	0.682099	0	1	DOWN
GO:0045263	proton-transporting ATP synthase complex, coupling factor F(o)	cellular_component	8	1	6654	4	26712	0.682099	0	1	DOWN
GO:0006651	diacylglycerol biosynthetic process	biological_process	8	1	6654	4	26712	0.682099	0	1	DOWN
GO:0006825	copper ion transport	biological_process	9	1	6654	4	26712	0.682099	0	1	DOWN
GO:0034975	protein folding in endoplasmic reticulum	biological_process	8	1	6654	4	26712	0.682099	1	0	UP
GO:0052894	norspermine:oxygen oxidoreductase activity	molecular_function	7	1	6654	4	26712	0.682099	1	0	UP
GO:0030991	intraciliary transport particle A	cellular_component	6	1	6654	4	26712	0.682099	1	0	UP
GO:0003917	DNA topoisomerase type I activity	molecular_function	6	1	6654	4	26712	0.682099	0	1	DOWN
GO:0010289	homogalacturonan biosynthetic process	biological_process	10	1	6654	4	26712	0.682099	0	1	DOWN
GO:0009805	coumarin biosynthetic process	biological_process	7	1	6654	4	26712	0.682099	0	1	DOWN
GO:0004749	ribose phosphate diphosphokinase activity	molecular_function	7	1	6654	4	26712	0.682099	1	0	UP
GO:0010225	response to UV-C	biological_process	8	1	6654	4	26712	0.682099	0	1	DOWN
GO:0030643	cellular phosphate ion homeostasis	biological_process	10	1	6654	4	26712	0.682099	0	1	DOWN
GO:0000914	phragmoplast assembly	biological_process	9	1	6654	4	26712	0.682099	0	1	DOWN
GO:2000082	regulation of L-ascorbic acid biosynthetic process	biological_process	9	1	6654	4	26712	0.682099	0	1	DOWN
GO:0016992	lipoate synthase activity	molecular_function	7	1	6654	4	26712	0.682099	0	1	DOWN
GO:0009743	response to carbohydrate	biological_process	6	1	6654	4	26712	0.682099	1	0	UP
GO:0070860	RNA polymerase I core factor complex	cellular_component	10	1	6654	4	26712	0.682099	1	0	UP
GO:0009945	radial axis specification	biological_process	9	1	6654	4	26712	0.682099	0	1	DOWN
GO:0019166	trans-2-enoyl-CoA reductase (NADPH) activity	molecular_function	7	1	6654	4	26712	0.682099	0	1	DOWN
GO:0052895	N1-acetylspermine:oxygen oxidoreductase (N1-acetylspermidine-forming) activity	molecular_function	7	1	6654	4	26712	0.682099	1	0	UP
GO:0006617	SRP-dependent cotranslational protein targeting to membrane, signal sequence recognition	biological_process	10	1	6654	4	26712	0.682099	0	1	DOWN
GO:0035721	intraciliary retrograde transport	biological_process	8	1	6654	4	26712	0.682099	1	0	UP
GO:0019348	dolichol metabolic process	biological_process	8	1	6654	4	26712	0.682099	0	1	DOWN
GO:0009317	acetyl-CoA carboxylase complex	cellular_component	9	1	6654	4	26712	0.682099	0	1	DOWN
GO:0006655	phosphatidylglycerol biosynthetic process	biological_process	8	1	6654	4	26712	0.682099	0	1	DOWN
GO:0047995	hydroxyphenylpyruvate reductase activity	molecular_function	7	1	6654	4	26712	0.682099	0	1	DOWN
GO:0043047	single-stranded telomeric DNA binding	molecular_function	9	1	6654	4	26712	0.682099	1	0	UP
GO:0032467	positive regulation of cytokinesis	biological_process	9	1	6654	4	26712	0.682099	0	1	DOWN
GO:1900182	positive regulation of protein localization to nucleus	biological_process	5	1	6654	4	26712	0.682099	0	1	DOWN
GO:0046839	phospholipid dephosphorylation	biological_process	8	1	6654	4	26712	0.682099	1	0	UP
GO:0006090	pyruvate metabolic process	biological_process	9	1	6654	4	26712	0.682099	0	1	DOWN
GO:0006546	glycine catabolic process	biological_process	10	1	6654	4	26712	0.682099	0	1	DOWN
GO:0003006	developmental process involved in reproduction	biological_process	4	1	6654	4	26712	0.682099	0	1	DOWN
GO:0000839	Hrd1p ubiquitin ligase ERAD-L complex	cellular_component	11	1	6654	4	26712	0.682099	0	1	DOWN
GO:0009062	fatty acid catabolic process	biological_process	9	1	6654	4	26712	0.682099	1	0	UP
GO:0080176	xyloglucan 1,6-alpha-xylosidase activity	molecular_function	7	1	6654	4	26712	0.682099	1	0	UP
GO:0006983	ER overload response	biological_process	8	1	6654	4	26712	0.682099	0	1	DOWN
GO:0071370	cellular response to gibberellin stimulus	biological_process	7	1	6654	4	26712	0.682099	1	0	UP
GO:0033047	regulation of mitotic sister chromatid segregation	biological_process	9	1	6654	4	26712	0.682099	0	1	DOWN
GO:0010253	UDP-rhamnose biosynthetic process	biological_process	11	1	6654	4	26712	0.682099	0	1	DOWN
GO:2000070	regulation of response to water deprivation	biological_process	6	1	6654	4	26712	0.682099	0	1	DOWN
GO:0044375	regulation of peroxisome size	biological_process	6	1	6654	4	26712	0.682099	0	1	DOWN
GO:0004149	dihydrolipoyllysine-residue succinyltransferase activity	molecular_function	9	1	6654	4	26712	0.682099	1	0	UP
GO:0004128	cytochrome-b5 reductase activity, acting on NAD(P)H	molecular_function	7	1	6654	4	26712	0.682099	1	0	UP
GO:0008622	epsilon DNA polymerase complex	cellular_component	8	1	6654	4	26712	0.682099	0	1	DOWN
GO:0000799	nuclear condensin complex	cellular_component	13	1	6654	4	26712	0.682099	0	1	DOWN
GO:0090410	malonate catabolic process	biological_process	9	1	6654	4	26712	0.682099	1	0	UP
GO:0009641	shade avoidance	biological_process	8	1	6654	4	26712	0.682099	0	1	DOWN
GO:0048213	Golgi vesicle prefusion complex stabilization	biological_process	7	1	6654	4	26712	0.682099	1	0	UP
GO:0010608	posttranscriptional regulation of gene expression	biological_process	8	1	6654	4	26712	0.682099	0	1	DOWN
GO:0052901	spermine:oxygen oxidoreductase (spermidine-forming) activity	molecular_function	7	1	6654	4	26712	0.682099	1	0	UP
GO:0006259	DNA metabolic process	biological_process	8	1	6654	4	26712	0.682099	0	1	DOWN
GO:0005751	mitochondrial respiratory chain complex IV	cellular_component	15	1	6654	4	26712	0.682099	1	0	UP
GO:0005775	vacuolar lumen	cellular_component	11	1	6654	4	26712	0.682099	1	0	UP
GO:0004324	ferredoxin-NADP+ reductase activity	molecular_function	7	1	6654	4	26712	0.682099	1	0	UP
GO:0009957	epidermal cell fate specification	biological_process	7	1	6654	4	26712	0.682099	1	0	UP
GO:0048016	inositol phosphate-mediated signaling	biological_process	9	1	6654	4	26712	0.682099	0	1	DOWN
GO:0004742	dihydrolipoyllysine-residue acetyltransferase activity	molecular_function	9	1	6654	4	26712	0.682099	1	0	UP
GO:0032876	negative regulation of DNA endoreduplication	biological_process	13	1	6654	4	26712	0.682099	0	1	DOWN
GO:0042819	vitamin B6 biosynthetic process	biological_process	8	1	6654	4	26712	0.682099	1	0	UP
GO:0019760	glucosinolate metabolic process	biological_process	8	1	6654	4	26712	0.682099	0	1	DOWN
GO:0070601	centromeric sister chromatid cohesion	biological_process	7	1	6654	4	26712	0.682099	0	1	DOWN
GO:0016314	phosphatidylinositol-3,4,5-trisphosphate 3-phosphatase activity	molecular_function	10	1	6654	4	26712	0.682099	0	1	DOWN
GO:0007584	response to nutrient	biological_process	7	1	6654	4	26712	0.682099	0	1	DOWN
GO:0010428	methyl-CpNpG binding	molecular_function	6	1	6654	4	26712	0.682099	0	1	DOWN
GO:0010005	cortical microtubule, transverse to long axis	cellular_component	11	1	6654	4	26712	0.682099	0	1	DOWN
GO:0030139	endocytic vesicle	cellular_component	11	1	6654	4	26712	0.682099	1	0	UP
GO:0052856	NADHX epimerase activity	molecular_function	6	1	6654	4	26712	0.682099	1	0	UP
GO:1990116	ribosome-associated ubiquitin-dependent protein catabolic process	biological_process	11	1	6654	4	26712	0.682099	0	1	DOWN
GO:0009897	external side of plasma membrane	cellular_component	6	1	6654	4	26712	0.682099	0	1	DOWN
GO:0042409	caffeoyl-CoA O-methyltransferase activity	molecular_function	8	1	6654	4	26712	0.682099	0	1	DOWN
GO:0010163	high-affinity potassium ion import	biological_process	8	1	6654	4	26712	0.682099	0	1	DOWN
GO:0009852	auxin catabolic process	biological_process	6	1	6654	4	26712	0.682099	0	1	DOWN
GO:0016002	sulfite reductase activity	molecular_function	6	1	6654	4	26712	0.682099	1	0	UP
GO:0016553	base conversion or substitution editing	biological_process	10	1	6654	4	26712	0.682099	0	1	DOWN
GO:0046656	folic acid biosynthetic process	biological_process	9	1	6654	4	26712	0.682099	1	0	UP
GO:0008615	pyridoxine biosynthetic process	biological_process	9	1	6654	4	26712	0.682099	1	0	UP
GO:0043489	RNA stabilization	biological_process	10	1	6654	4	26712	0.682099	0	1	DOWN
GO:0010032	meiotic chromosome condensation	biological_process	7	1	6654	4	26712	0.682099	0	1	DOWN
GO:1901006	ubiquinone-6 biosynthetic process	biological_process	9	1	6654	4	26712	0.682099	0	1	DOWN
GO:0046475	glycerophospholipid catabolic process	biological_process	8	1	6654	4	26712	0.682099	0	1	DOWN
GO:0010016	shoot system morphogenesis	biological_process	8	1	6654	4	26712	0.682099	0	1	DOWN
GO:0004392	heme oxygenase (decyclizing) activity	molecular_function	6	1	6654	4	26712	0.682099	0	1	DOWN
GO:0052857	NADPHX epimerase activity	molecular_function	6	1	6654	4	26712	0.682099	1	0	UP
GO:1990171	SCF complex disassembly in response to cadmium stress	biological_process	8	1	6654	4	26712	0.682099	0	1	DOWN
GO:0004776	succinate-CoA ligase (GDP-forming) activity	molecular_function	8	1	6654	4	26712	0.682099	1	0	UP
GO:0030835	negative regulation of actin filament depolymerization	biological_process	11	1	6654	4	26712	0.682099	0	1	DOWN
GO:0070651	nonfunctional rRNA decay	biological_process	11	1	6654	4	26712	0.682099	0	1	DOWN
GO:0060195	negative regulation of antisense RNA transcription	biological_process	13	1	6654	4	26712	0.682099	1	0	UP
GO:1990112	RQC complex	cellular_component	5	1	6654	4	26712	0.682099	0	1	DOWN
GO:0047746	chlorophyllase activity	molecular_function	7	1	6654	4	26712	0.682099	0	1	DOWN
GO:0010429	methyl-CpNpN binding	molecular_function	6	1	6654	4	26712	0.682099	0	1	DOWN
GO:0034098	VCP-NPL4-UFD1 AAA ATPase complex	cellular_component	12	1	6654	4	26712	0.682099	0	1	DOWN
GO:0090409	malonyl-CoA synthetase activity	molecular_function	7	1	6654	4	26712	0.682099	1	0	UP
GO:0008460	dTDP-glucose 4,6-dehydratase activity	molecular_function	7	1	6654	4	26712	0.682099	0	1	DOWN
GO:0016767	geranylgeranyl-diphosphate geranylgeranyltransferase activity	molecular_function	8	1	6654	4	26712	0.682099	0	1	DOWN
GO:0071712	ER-associated misfolded protein catabolic process	biological_process	12	1	6654	4	26712	0.682099	0	1	DOWN
GO:0030133	transport vesicle	cellular_component	11	1	6654	4	26712	0.682099	0	1	DOWN
GO:0008381	mechanically-gated ion channel activity	molecular_function	9	1	6654	4	26712	0.682099	0	1	DOWN
GO:0061166	establishment of endoplasmic reticulum localization involved in endoplasmic reticulum polarization at cell division site	biological_process	9	1	6654	4	26712	0.682099	0	1	DOWN
GO:0008276	protein methyltransferase activity	molecular_function	7	1	6654	4	26712	0.682099	0	1	DOWN
GO:0010452	histone H3-K36 methylation	biological_process	9	1	6654	4	26712	0.682099	0	1	DOWN
GO:0009877	nodulation	biological_process	6	1	6654	4	26712	0.682099	1	0	UP
GO:0035265	organ growth	biological_process	5	1	6654	4	26712	0.682099	0	1	DOWN
GO:0070545	PeBoW complex	cellular_component	10	1	6654	4	26712	0.682099	1	0	UP
GO:0035542	regulation of SNARE complex assembly	biological_process	8	1	6654	4	26712	0.682099	0	1	DOWN
GO:0071705	nitrogen compound transport	biological_process	6	1	6654	4	26712	0.682099	1	0	UP
GO:0043813	phosphatidylinositol-3,5-bisphosphate 5-phosphatase activity	molecular_function	10	1	6654	4	26712	0.682099	0	1	DOWN
GO:0005504	fatty acid binding	molecular_function	5	1	6654	4	26712	0.682099	0	1	DOWN
GO:0009702	L-arabinokinase activity	molecular_function	8	1	6654	4	26712	0.682099	1	0	UP
GO:0045787	positive regulation of cell cycle	biological_process	6	1	6654	4	26712	0.682099	0	1	DOWN
GO:0031120	snRNA pseudouridine synthesis	biological_process	11	1	6654	4	26712	0.682099	1	0	UP
GO:0010541	acropetal auxin transport	biological_process	8	1	6654	4	26712	0.682099	0	1	DOWN
GO:0043153	entrainment of circadian clock by photoperiod	biological_process	7	1	6654	4	26712	0.682099	0	1	DOWN
GO:0034614	cellular response to reactive oxygen species	biological_process	7	1	6654	4	26712	0.682099	0	1	DOWN
GO:0009904	chloroplast accumulation movement	biological_process	8	1	6654	4	26712	0.682099	0	1	DOWN
GO:0008170	N-methyltransferase activity	molecular_function	7	1	6654	4	26712	0.682099	0	1	DOWN
GO:0080148	negative regulation of response to water deprivation	biological_process	6	1	6654	4	26712	0.682099	0	1	DOWN
GO:2000028	regulation of photoperiodism, flowering	biological_process	7	1	6654	4	26712	0.682099	1	0	UP
GO:0008398	sterol 14-demethylase activity	molecular_function	7	1	6654	4	26712	0.682099	0	1	DOWN
GO:2001168	positive regulation of histone H2B ubiquitination	biological_process	12	1	6654	4	26712	0.682099	0	1	DOWN
GO:0070829	heterochromatin maintenance	biological_process	8	1	6654	4	26712	0.682099	0	1	DOWN
GO:0000837	Doa10p ubiquitin ligase complex	cellular_component	10	1	6654	4	26712	0.682099	0	1	DOWN
GO:0009107	lipoate biosynthetic process	biological_process	10	1	6654	4	26712	0.682099	0	1	DOWN
GO:0080041	ADP-ribose pyrophosphohydrolase activity	molecular_function	9	1	6654	4	26712	0.682099	0	1	DOWN
GO:0010133	proline catabolic process to glutamate	biological_process	11	1	6654	4	26712	0.682099	0	1	DOWN
GO:0004765	shikimate kinase activity	molecular_function	7	1	6654	4	26712	0.682099	0	1	DOWN
GO:0048508	embryonic meristem development	biological_process	6	1	6654	4	26712	0.682099	0	1	DOWN
GO:0045431	flavonol synthase activity	molecular_function	7	1	6654	4	26712	0.682099	1	0	UP
GO:0016320	endoplasmic reticulum membrane fusion	biological_process	6	1	6654	4	26712	0.682099	0	1	DOWN
GO:0031990	mRNA export from nucleus in response to heat stress	biological_process	8	1	6654	4	26712	0.682099	0	1	DOWN
GO:0017150	tRNA dihydrouridine synthase activity	molecular_function	6	1	6654	4	26712	0.682099	0	1	DOWN
GO:0004475	mannose-1-phosphate guanylyltransferase activity	molecular_function	9	1	6654	4	26712	0.682099	0	1	DOWN
GO:0031640	killing of cells of other organism	biological_process	4	1	6654	4	26712	0.682099	1	0	UP
GO:0070300	phosphatidic acid binding	molecular_function	6	1	6654	4	26712	0.682099	0	1	DOWN
GO:0070919	production of siRNA involved in chromatin silencing by small RNA	biological_process	15	1	6654	4	26712	0.682099	0	1	DOWN
GO:0060271	cilium morphogenesis	biological_process	7	1	6654	4	26712	0.682099	1	0	UP
GO:0010148	transpiration	biological_process	7	1	6654	4	26712	0.682099	0	1	DOWN
GO:0051233	spindle midzone	cellular_component	10	1	6654	4	26712	0.682099	1	0	UP
GO:0042823	pyridoxal phosphate biosynthetic process	biological_process	8	1	6654	4	26712	0.682099	1	0	UP
GO:0031134	sister chromatid biorientation	biological_process	10	1	6654	4	26712	0.682099	0	1	DOWN
GO:0000987	core promoter proximal region sequence-specific DNA binding	molecular_function	10	1	6654	4	26712	0.682099	0	1	DOWN
GO:0051775	response to redox state	biological_process	4	1	6654	4	26712	0.682099	0	1	DOWN
GO:0035269	protein O-linked mannosylation	biological_process	10	1	6654	4	26712	0.682099	0	1	DOWN
GO:0019430	removal of superoxide radicals	biological_process	7	4	6654	18	26712	0.691319	0	4	DOWN
GO:0010218	response to far red light	biological_process	8	4	6654	18	26712	0.691319	0	4	DOWN
GO:0008138	protein tyrosine/serine/threonine phosphatase activity	molecular_function	9	4	6654	18	26712	0.691319	0	4	DOWN
GO:0030148	sphingolipid biosynthetic process	biological_process	7	4	6654	18	26712	0.691319	0	4	DOWN
GO:0030586	[methionine synthase] reductase activity	molecular_function	7	2	6654	9	26712	0.697542	2	0	UP
GO:0071482	cellular response to light stimulus	biological_process	7	2	6654	9	26712	0.697542	0	2	DOWN
GO:0006809	nitric oxide biosynthetic process	biological_process	7	2	6654	9	26712	0.697542	2	0	UP
GO:0000793	condensed chromosome	cellular_component	10	2	6654	9	26712	0.697542	0	2	DOWN
GO:0046688	response to copper ion	biological_process	7	2	6654	9	26712	0.697542	0	2	DOWN
GO:0019375	galactolipid biosynthetic process	biological_process	8	2	6654	9	26712	0.697542	0	2	DOWN
GO:0043562	cellular response to nitrogen levels	biological_process	8	2	6654	9	26712	0.697542	2	0	UP
GO:0000795	synaptonemal complex	cellular_component	13	2	6654	9	26712	0.697542	0	2	DOWN
GO:0006047	UDP-N-acetylglucosamine metabolic process	biological_process	11	2	6654	9	26712	0.697542	2	0	UP
GO:0034440	lipid oxidation	biological_process	7	2	6654	9	26712	0.697542	0	2	DOWN
GO:0010267	production of ta-siRNAs involved in RNA interference	biological_process	13	2	6654	9	26712	0.697542	0	2	DOWN
GO:0043484	regulation of RNA splicing	biological_process	11	2	6654	9	26712	0.697542	0	2	DOWN
GO:0009639	response to red or far red light	biological_process	7	2	6654	9	26712	0.697542	0	2	DOWN
GO:0005315	inorganic phosphate transmembrane transporter activity	molecular_function	7	2	6654	9	26712	0.697542	0	2	DOWN
GO:0030865	cortical cytoskeleton organization	biological_process	6	2	6654	9	26712	0.697542	0	2	DOWN
GO:0015630	microtubule cytoskeleton	cellular_component	10	2	6654	9	26712	0.697542	0	2	DOWN
GO:0010015	root morphogenesis	biological_process	9	2	6654	9	26712	0.697542	0	2	DOWN
GO:0004737	pyruvate decarboxylase activity	molecular_function	7	3	6654	14	26712	0.716342	3	0	UP
GO:0031369	translation initiation factor binding	molecular_function	5	3	6654	14	26712	0.716342	3	0	UP
GO:0016836	hydro-lyase activity	molecular_function	6	3	6654	14	26712	0.716342	3	0	UP
GO:0000155	phosphorelay sensor kinase activity	molecular_function	9	3	6654	14	26712	0.716342	0	3	DOWN
GO:0034968	histone lysine methylation	biological_process	8	3	6654	14	26712	0.716342	0	3	DOWN
GO:0010205	photoinhibition	biological_process	8	3	6654	14	26712	0.716342	0	3	DOWN
GO:0031248	protein acetyltransferase complex	cellular_component	7	3	6654	14	26712	0.716342	0	3	DOWN
GO:0000784	nuclear chromosome, telomeric region	cellular_component	13	6	6654	28	26712	0.732786	0	6	DOWN
GO:0090502	RNA phosphodiester bond hydrolysis, endonucleolytic	biological_process	10	6	6654	28	26712	0.732786	0	6	DOWN
GO:0010388	cullin deneddylation	biological_process	11	2	6654	10	26712	0.753998	2	0	UP
GO:0000326	protein storage vacuole	cellular_component	11	2	6654	10	26712	0.753998	2	0	UP
GO:0004372	glycine hydroxymethyltransferase activity	molecular_function	7	2	6654	10	26712	0.753998	0	2	DOWN
GO:0045910	negative regulation of DNA recombination	biological_process	11	2	6654	10	26712	0.753998	2	0	UP
GO:0019509	L-methionine biosynthetic process from methylthioadenosine	biological_process	12	2	6654	10	26712	0.753998	2	0	UP
GO:0006544	glycine metabolic process	biological_process	9	2	6654	10	26712	0.753998	0	2	DOWN
GO:0010337	regulation of salicylic acid metabolic process	biological_process	10	2	6654	10	26712	0.753998	0	2	DOWN
GO:0046283	anthocyanin-containing compound metabolic process	biological_process	6	2	6654	10	26712	0.753998	0	2	DOWN
GO:0008964	phosphoenolpyruvate carboxylase activity	molecular_function	8	2	6654	10	26712	0.753998	0	2	DOWN
GO:0045038	protein import into chloroplast thylakoid membrane	biological_process	9	2	6654	10	26712	0.753998	0	2	DOWN
GO:0004550	nucleoside diphosphate kinase activity	molecular_function	8	2	6654	10	26712	0.753998	2	0	UP
GO:0046740	transport of virus in host, cell to cell	biological_process	6	2	6654	10	26712	0.753998	0	2	DOWN
GO:0030983	mismatched DNA binding	molecular_function	9	2	6654	10	26712	0.753998	0	2	DOWN
GO:0000079	regulation of cyclin-dependent protein serine/threonine kinase activity	biological_process	12	2	6654	10	26712	0.753998	0	2	DOWN
GO:0004012	phospholipid-translocating ATPase activity	molecular_function	12	2	6654	10	26712	0.753998	2	0	UP
GO:0016706	oxidoreductase activity, acting on paired donors, with incorporation or reduction of molecular oxygen, 2-oxoglutarate as one donor, and incorporation of one atom each of oxygen into both donors	molecular_function	6	2	6654	10	26712	0.753998	2	0	UP
GO:0000989	transcription factor activity, transcription factor binding	molecular_function	4	1	6654	5	26712	0.7613	0	1	DOWN
GO:0010076	maintenance of floral meristem identity	biological_process	11	1	6654	5	26712	0.7613	0	1	DOWN
GO:0001561	fatty acid alpha-oxidation	biological_process	10	1	6654	5	26712	0.7613	0	1	DOWN
GO:0006426	glycyl-tRNA aminoacylation	biological_process	13	1	6654	5	26712	0.7613	1	0	UP
GO:0043680	filiform apparatus	cellular_component	8	1	6654	5	26712	0.7613	0	1	DOWN
GO:0001676	long-chain fatty acid metabolic process	biological_process	10	1	6654	5	26712	0.7613	1	0	UP
GO:0009165	nucleotide biosynthetic process	biological_process	9	1	6654	5	26712	0.7613	1	0	UP
GO:0005471	ATP:ADP antiporter activity	molecular_function	9	1	6654	5	26712	0.7613	0	1	DOWN
GO:0042995	cell projection	cellular_component	5	1	6654	5	26712	0.7613	0	1	DOWN
GO:0000030	mannosyltransferase activity	molecular_function	7	1	6654	5	26712	0.7613	0	1	DOWN
GO:0004582	dolichyl-phosphate beta-D-mannosyltransferase activity	molecular_function	8	1	6654	5	26712	0.7613	0	1	DOWN
GO:0071630	nucleus-associated proteasomal ubiquitin-dependent protein catabolic process	biological_process	11	1	6654	5	26712	0.7613	0	1	DOWN
GO:0045003	double-strand break repair via synthesis-dependent strand annealing	biological_process	12	1	6654	5	26712	0.7613	0	1	DOWN
GO:0010328	auxin influx transmembrane transporter activity	molecular_function	7	1	6654	5	26712	0.7613	1	0	UP
GO:0001106	RNA polymerase II transcription corepressor activity	molecular_function	7	1	6654	5	26712	0.7613	0	1	DOWN
GO:0046677	response to antibiotic	biological_process	6	1	6654	5	26712	0.7613	0	1	DOWN
GO:0032947	protein complex scaffold	molecular_function	4	1	6654	5	26712	0.7613	1	0	UP
GO:0043335	protein unfolding	biological_process	7	1	6654	5	26712	0.7613	0	1	DOWN
GO:0006007	glucose catabolic process	biological_process	9	1	6654	5	26712	0.7613	1	0	UP
GO:0000993	RNA polymerase II core binding	molecular_function	7	1	6654	5	26712	0.7613	0	1	DOWN
GO:0052694	jasmonoyl-isoleucine-12-hydroxylase activity	molecular_function	6	1	6654	5	26712	0.7613	1	0	UP
GO:0016124	xanthophyll catabolic process	biological_process	11	1	6654	5	26712	0.7613	0	1	DOWN
GO:0000124	SAGA complex	cellular_component	10	1	6654	5	26712	0.7613	0	1	DOWN
GO:0042285	xylosyltransferase activity	molecular_function	7	1	6654	5	26712	0.7613	0	1	DOWN
GO:0016150	translation release factor activity, codon nonspecific	molecular_function	10	1	6654	5	26712	0.7613	0	1	DOWN
GO:0016462	pyrophosphatase activity	molecular_function	7	1	6654	5	26712	0.7613	0	1	DOWN
GO:0004816	asparagine-tRNA ligase activity	molecular_function	8	1	6654	5	26712	0.7613	0	1	DOWN
GO:0000256	allantoin catabolic process	biological_process	8	1	6654	5	26712	0.7613	0	1	DOWN
GO:0008728	GTP diphosphokinase activity	molecular_function	7	1	6654	5	26712	0.7613	0	1	DOWN
GO:0016023	cytoplasmic, membrane-bounded vesicle	cellular_component	10	1	6654	5	26712	0.7613	0	1	DOWN
GO:0004820	glycine-tRNA ligase activity	molecular_function	8	1	6654	5	26712	0.7613	1	0	UP
GO:0005675	holo TFIIH complex	cellular_component	10	1	6654	5	26712	0.7613	0	1	DOWN
GO:0071365	cellular response to auxin stimulus	biological_process	8	1	6654	5	26712	0.7613	1	0	UP
GO:0016229	steroid dehydrogenase activity	molecular_function	5	1	6654	5	26712	0.7613	1	0	UP
GO:0072671	mitochondria-associated ubiquitin-dependent protein catabolic process	biological_process	11	1	6654	5	26712	0.7613	0	1	DOWN
GO:0030674	protein binding, bridging	molecular_function	5	1	6654	5	26712	0.7613	1	0	UP
GO:0051228	mitotic spindle disassembly	biological_process	9	1	6654	5	26712	0.7613	0	1	DOWN
GO:0032509	endosome transport via multivesicular body sorting pathway	biological_process	7	1	6654	5	26712	0.7613	0	1	DOWN
GO:0010270	photosystem II oxygen evolving complex assembly	biological_process	8	1	6654	5	26712	0.7613	0	1	DOWN
GO:0071446	cellular response to salicylic acid stimulus	biological_process	7	1	6654	5	26712	0.7613	0	1	DOWN
GO:0010389	regulation of G2/M transition of mitotic cell cycle	biological_process	9	1	6654	5	26712	0.7613	0	1	DOWN
GO:2000653	regulation of genetic imprinting	biological_process	8	1	6654	5	26712	0.7613	0	1	DOWN
GO:0030308	negative regulation of cell growth	biological_process	7	1	6654	5	26712	0.7613	0	1	DOWN
GO:0009247	glycolipid biosynthetic process	biological_process	7	1	6654	5	26712	0.7613	0	1	DOWN
GO:0070401	NADP+ binding	molecular_function	7	1	6654	5	26712	0.7613	1	0	UP
GO:0016435	rRNA (guanine) methyltransferase activity	molecular_function	9	1	6654	5	26712	0.7613	0	1	DOWN
GO:0015292	uniporter activity	molecular_function	7	1	6654	5	26712	0.7613	0	1	DOWN
GO:0031618	nuclear pericentric heterochromatin	cellular_component	15	1	6654	5	26712	0.7613	0	1	DOWN
GO:0003978	UDP-glucose 4-epimerase activity	molecular_function	7	1	6654	5	26712	0.7613	0	1	DOWN
GO:0006421	asparaginyl-tRNA aminoacylation	biological_process	13	1	6654	5	26712	0.7613	0	1	DOWN
GO:0000779	condensed chromosome, centromeric region	cellular_component	11	1	6654	5	26712	0.7613	0	1	DOWN
GO:0043138	3'-5' DNA helicase activity	molecular_function	11	1	6654	5	26712	0.7613	0	1	DOWN
GO:0004152	dihydroorotate dehydrogenase activity	molecular_function	7	1	6654	5	26712	0.7613	1	0	UP
GO:0050992	dimethylallyl diphosphate biosynthetic process	biological_process	7	1	6654	5	26712	0.7613	1	0	UP
GO:0010019	chloroplast-nucleus signaling pathway	biological_process	7	1	6654	5	26712	0.7613	0	1	DOWN
GO:0046854	phosphatidylinositol phosphorylation	biological_process	10	1	6654	5	26712	0.7613	1	0	UP
GO:0060964	regulation of gene silencing by miRNA	biological_process	12	1	6654	5	26712	0.7613	0	1	DOWN
GO:0010071	root meristem specification	biological_process	7	1	6654	5	26712	0.7613	1	0	UP
GO:0044255	cellular lipid metabolic process	biological_process	5	1	6654	5	26712	0.7613	0	1	DOWN
GO:0003987	acetate-CoA ligase activity	molecular_function	7	1	6654	5	26712	0.7613	1	0	UP
GO:0042732	D-xylose metabolic process	biological_process	9	1	6654	5	26712	0.7613	0	1	DOWN
GO:0015969	guanosine tetraphosphate metabolic process	biological_process	12	1	6654	5	26712	0.7613	0	1	DOWN
GO:0018131	oxazole or thiazole biosynthetic process	biological_process	7	1	6654	5	26712	0.7613	0	1	DOWN
GO:0008429	phosphatidylethanolamine binding	molecular_function	6	1	6654	5	26712	0.7613	0	1	DOWN
GO:0010363	regulation of plant-type hypersensitive response	biological_process	7	1	6654	5	26712	0.7613	0	1	DOWN
GO:0000774	adenyl-nucleotide exchange factor activity	molecular_function	8	1	6654	5	26712	0.7613	1	0	UP
GO:0016604	nuclear body	cellular_component	13	1	6654	5	26712	0.7613	0	1	DOWN
GO:0060919	auxin influx	biological_process	7	1	6654	5	26712	0.7613	1	0	UP
GO:0008106	alcohol dehydrogenase (NADP+) activity	molecular_function	8	1	6654	5	26712	0.7613	1	0	UP
GO:0055062	phosphate ion homeostasis	biological_process	10	1	6654	5	26712	0.7613	0	1	DOWN
GO:0031054	pre-miRNA processing	biological_process	13	1	6654	5	26712	0.7613	0	1	DOWN
GO:0006101	citrate metabolic process	biological_process	9	1	6654	5	26712	0.7613	1	0	UP
GO:0008526	phosphatidylinositol transporter activity	molecular_function	7	1	6654	5	26712	0.7613	0	1	DOWN
GO:0036266	Cdc48p-Npl4p-Vms1p AAA ATPase complex	cellular_component	14	1	6654	5	26712	0.7613	0	1	DOWN
GO:0034051	negative regulation of plant-type hypersensitive response	biological_process	8	1	6654	5	26712	0.7613	0	1	DOWN
GO:0046417	chorismate metabolic process	biological_process	9	1	6654	5	26712	0.7613	1	0	UP
GO:0033926	glycopeptide alpha-N-acetylgalactosaminidase activity	molecular_function	7	1	6654	5	26712	0.7613	0	1	DOWN
GO:0006399	tRNA metabolic process	biological_process	10	1	6654	5	26712	0.7613	0	1	DOWN
GO:0045488	pectin metabolic process	biological_process	8	1	6654	5	26712	0.7613	0	1	DOWN
GO:0004867	serine-type endopeptidase inhibitor activity	molecular_function	7	1	6654	5	26712	0.7613	1	0	UP
GO:0010369	chromocenter	cellular_component	12	1	6654	5	26712	0.7613	1	0	UP
GO:0043668	exine	cellular_component	6	1	6654	5	26712	0.7613	0	1	DOWN
GO:0006739	NADP metabolic process	biological_process	12	1	6654	5	26712	0.7613	1	0	UP
GO:0019048	modulation by virus of host morphology or physiology	biological_process	6	1	6654	5	26712	0.7613	1	0	UP
GO:0000919	cell plate assembly	biological_process	10	1	6654	5	26712	0.7613	0	1	DOWN
GO:0030124	AP-4 adaptor complex	cellular_component	11	1	6654	5	26712	0.7613	0	1	DOWN
GO:0010487	thermospermine synthase activity	molecular_function	6	1	6654	5	26712	0.7613	0	1	DOWN
GO:0007569	cell aging	biological_process	5	1	6654	5	26712	0.7613	0	1	DOWN
GO:0016118	carotenoid catabolic process	biological_process	10	1	6654	5	26712	0.7613	0	1	DOWN
GO:0008936	nicotinamidase activity	molecular_function	7	1	6654	5	26712	0.7613	1	0	UP
GO:0000741	karyogamy	biological_process	6	1	6654	5	26712	0.7613	0	1	DOWN
GO:0052716	hydroquinone:oxygen oxidoreductase activity	molecular_function	7	1	6654	5	26712	0.7613	0	1	DOWN
GO:0006501	C-terminal protein lipidation	biological_process	9	1	6654	5	26712	0.7613	0	1	DOWN
GO:0008134	transcription factor binding	molecular_function	5	3	6654	15	26712	0.761551	0	3	DOWN
GO:0031307	integral component of mitochondrial outer membrane	cellular_component	15	3	6654	15	26712	0.761551	0	3	DOWN
GO:0003725	double-stranded RNA binding	molecular_function	7	3	6654	15	26712	0.761551	0	3	DOWN
GO:0004673	protein histidine kinase activity	molecular_function	8	3	6654	15	26712	0.761551	0	3	DOWN
GO:0035196	production of miRNAs involved in gene silencing by miRNA	biological_process	12	3	6654	15	26712	0.761551	0	3	DOWN
GO:0070475	rRNA base methylation	biological_process	14	4	6654	20	26712	0.772205	0	4	DOWN
GO:0005655	nucleolar ribonuclease P complex	cellular_component	10	4	6654	20	26712	0.772205	0	4	DOWN
GO:0040008	regulation of growth	biological_process	4	7	6654	34	26712	0.778609	0	7	DOWN
GO:0008559	xenobiotic-transporting ATPase activity	molecular_function	13	10	6654	48	26712	0.791361	10	0	UP
GO:0006098	pentose-phosphate shunt	biological_process	14	6	6654	30	26712	0.794395	6	0	UP
GO:0080022	primary root development	biological_process	9	3	6654	16	26712	0.80072	0	3	DOWN
GO:0019748	secondary metabolic process	biological_process	5	3	6654	16	26712	0.80072	3	0	UP
GO:0007076	mitotic chromosome condensation	biological_process	12	2	6654	11	26712	0.801099	0	2	DOWN
GO:0004616	phosphogluconate dehydrogenase (decarboxylating) activity	molecular_function	7	2	6654	11	26712	0.801099	2	0	UP
GO:0090333	regulation of stomatal closure	biological_process	7	2	6654	11	26712	0.801099	0	2	DOWN
GO:0006563	L-serine metabolic process	biological_process	9	2	6654	11	26712	0.801099	0	2	DOWN
GO:0016444	somatic cell DNA recombination	biological_process	10	2	6654	11	26712	0.801099	2	0	UP
GO:0004373	glycogen (starch) synthase activity	molecular_function	8	2	6654	11	26712	0.801099	0	2	DOWN
GO:0018026	peptidyl-lysine monomethylation	biological_process	8	2	6654	11	26712	0.801099	0	2	DOWN
GO:0006346	methylation-dependent chromatin silencing	biological_process	14	2	6654	11	26712	0.801099	0	2	DOWN
GO:0044611	nuclear pore inner ring	cellular_component	13	2	6654	11	26712	0.801099	0	2	DOWN
GO:0048579	negative regulation of long-day photoperiodism, flowering	biological_process	8	2	6654	11	26712	0.801099	0	2	DOWN
GO:0003871	5-methyltetrahydropteroyltriglutamate-homocysteine S-methyltransferase activity	molecular_function	8	2	6654	11	26712	0.801099	0	2	DOWN
GO:0008705	methionine synthase activity	molecular_function	8	2	6654	11	26712	0.801099	0	2	DOWN
GO:0012501	programmed cell death	biological_process	6	2	6654	11	26712	0.801099	2	0	UP
GO:0009863	salicylic acid mediated signaling pathway	biological_process	7	2	6654	11	26712	0.801099	0	2	DOWN
GO:0000014	single-stranded DNA endodeoxyribonuclease activity	molecular_function	9	2	6654	11	26712	0.801099	0	2	DOWN
GO:0050667	homocysteine metabolic process	biological_process	8	2	6654	11	26712	0.801099	0	2	DOWN
GO:0004739	pyruvate dehydrogenase (acetyl-transferring) activity	molecular_function	7	2	6654	11	26712	0.801099	0	2	DOWN
GO:0034389	lipid particle organization	biological_process	5	2	6654	11	26712	0.801099	0	2	DOWN
GO:0000060	protein import into nucleus, translocation	biological_process	7	2	6654	11	26712	0.801099	0	2	DOWN
GO:0005876	spindle microtubule	cellular_component	10	2	6654	11	26712	0.801099	2	0	UP
GO:0019900	kinase binding	molecular_function	6	4	6654	21	26712	0.805885	0	4	DOWN
GO:0030036	actin cytoskeleton organization	biological_process	6	5	6654	26	26712	0.813009	0	5	DOWN
GO:0008650	rRNA (uridine-2'-O-)-methyltransferase activity	molecular_function	8	1	6654	6	26712	0.820772	0	1	DOWN
GO:0031936	negative regulation of chromatin silencing	biological_process	13	1	6654	6	26712	0.820772	0	1	DOWN
GO:0030041	actin filament polymerization	biological_process	9	1	6654	6	26712	0.820772	0	1	DOWN
GO:0031298	replication fork protection complex	cellular_component	13	1	6654	6	26712	0.820772	0	1	DOWN
GO:0006433	prolyl-tRNA aminoacylation	biological_process	13	1	6654	6	26712	0.820772	0	1	DOWN
GO:0015081	sodium ion transmembrane transporter activity	molecular_function	10	1	6654	6	26712	0.820772	0	1	DOWN
GO:0051304	chromosome separation	biological_process	7	1	6654	6	26712	0.820772	0	1	DOWN
GO:0030029	actin filament-based process	biological_process	5	1	6654	6	26712	0.820772	0	1	DOWN
GO:0036265	RNA (guanine-N7)-methylation	biological_process	12	1	6654	6	26712	0.820772	0	1	DOWN
GO:0006571	tyrosine biosynthetic process	biological_process	10	1	6654	6	26712	0.820772	1	0	UP
GO:0006744	ubiquinone biosynthetic process	biological_process	8	1	6654	6	26712	0.820772	1	0	UP
GO:0015197	peptide transporter activity	molecular_function	5	1	6654	6	26712	0.820772	0	1	DOWN
GO:0000015	phosphopyruvate hydratase complex	cellular_component	11	1	6654	6	26712	0.820772	1	0	UP
GO:0008253	5'-nucleotidase activity	molecular_function	9	1	6654	6	26712	0.820772	0	1	DOWN
GO:0048480	stigma development	biological_process	7	1	6654	6	26712	0.820772	1	0	UP
GO:0060148	positive regulation of posttranscriptional gene silencing	biological_process	11	1	6654	6	26712	0.820772	0	1	DOWN
GO:0004821	histidine-tRNA ligase activity	molecular_function	8	1	6654	6	26712	0.820772	1	0	UP
GO:0004623	phospholipase A2 activity	molecular_function	8	1	6654	6	26712	0.820772	0	1	DOWN
GO:0034497	protein localization to pre-autophagosomal structure	biological_process	7	1	6654	6	26712	0.820772	0	1	DOWN
GO:0008534	oxidized purine nucleobase lesion DNA N-glycosylase activity	molecular_function	10	1	6654	6	26712	0.820772	1	0	UP
GO:0000407	pre-autophagosomal structure	cellular_component	9	1	6654	6	26712	0.820772	0	1	DOWN
GO:0009625	response to insect	biological_process	7	1	6654	6	26712	0.820772	0	1	DOWN
GO:0015934	large ribosomal subunit	cellular_component	11	1	6654	6	26712	0.820772	0	1	DOWN
GO:0031125	rRNA 3'-end processing	biological_process	12	1	6654	6	26712	0.820772	1	0	UP
GO:0000055	ribosomal large subunit export from nucleus	biological_process	9	1	6654	6	26712	0.820772	1	0	UP
GO:0006113	fermentation	biological_process	7	1	6654	6	26712	0.820772	1	0	UP
GO:0034707	chloride channel complex	cellular_component	8	1	6654	6	26712	0.820772	0	1	DOWN
GO:0044183	protein binding involved in protein folding	molecular_function	5	1	6654	6	26712	0.820772	0	1	DOWN
GO:0005545	1-phosphatidylinositol binding	molecular_function	7	1	6654	6	26712	0.820772	0	1	DOWN
GO:0006644	phospholipid metabolic process	biological_process	7	1	6654	6	26712	0.820772	1	0	UP
GO:0034757	negative regulation of iron ion transport	biological_process	11	1	6654	6	26712	0.820772	0	1	DOWN
GO:0006152	purine nucleoside catabolic process	biological_process	9	1	6654	6	26712	0.820772	0	1	DOWN
GO:0060359	response to ammonium ion	biological_process	6	1	6654	6	26712	0.820772	0	1	DOWN
GO:0009569	chloroplast starch grain	cellular_component	12	1	6654	6	26712	0.820772	0	1	DOWN
GO:0009041	uridylate kinase activity	molecular_function	9	1	6654	6	26712	0.820772	0	1	DOWN
GO:0015334	high-affinity oligopeptide transporter activity	molecular_function	7	1	6654	6	26712	0.820772	0	1	DOWN
GO:0008477	purine nucleosidase activity	molecular_function	7	1	6654	6	26712	0.820772	0	1	DOWN
GO:0010136	ureide catabolic process	biological_process	8	1	6654	6	26712	0.820772	0	1	DOWN
GO:0030014	CCR4-NOT complex	cellular_component	7	1	6654	6	26712	0.820772	0	1	DOWN
GO:0005798	Golgi-associated vesicle	cellular_component	11	1	6654	6	26712	0.820772	0	1	DOWN
GO:0004044	amidophosphoribosyltransferase activity	molecular_function	7	1	6654	6	26712	0.820772	1	0	UP
GO:0009150	purine ribonucleotide metabolic process	biological_process	11	1	6654	6	26712	0.820772	0	1	DOWN
GO:0000578	embryonic axis specification	biological_process	8	1	6654	6	26712	0.820772	0	1	DOWN
GO:0005578	proteinaceous extracellular matrix	cellular_component	5	1	6654	6	26712	0.820772	0	1	DOWN
GO:0051262	protein tetramerization	biological_process	9	1	6654	6	26712	0.820772	1	0	UP
GO:0006427	histidyl-tRNA aminoacylation	biological_process	13	1	6654	6	26712	0.820772	1	0	UP
GO:0004827	proline-tRNA ligase activity	molecular_function	8	1	6654	6	26712	0.820772	0	1	DOWN
GO:0048268	clathrin coat assembly	biological_process	8	1	6654	6	26712	0.820772	0	1	DOWN
GO:0006145	purine nucleobase catabolic process	biological_process	10	1	6654	6	26712	0.820772	0	1	DOWN
GO:0044614	nuclear pore cytoplasmic filaments	cellular_component	13	1	6654	6	26712	0.820772	0	1	DOWN
GO:0004340	glucokinase activity	molecular_function	9	1	6654	6	26712	0.820772	1	0	UP
GO:0030026	cellular manganese ion homeostasis	biological_process	11	1	6654	6	26712	0.820772	0	1	DOWN
GO:0005342	organic acid transmembrane transporter activity	molecular_function	6	1	6654	6	26712	0.820772	0	1	DOWN
GO:0035494	SNARE complex disassembly	biological_process	9	1	6654	6	26712	0.820772	0	1	DOWN
GO:0033897	ribonuclease T2 activity	molecular_function	10	1	6654	6	26712	0.820772	0	1	DOWN
GO:0034398	telomere tethering at nuclear periphery	biological_process	8	1	6654	6	26712	0.820772	0	1	DOWN
GO:0005828	kinetochore microtubule	cellular_component	11	1	6654	6	26712	0.820772	0	1	DOWN
GO:0009694	jasmonic acid metabolic process	biological_process	9	1	6654	6	26712	0.820772	1	0	UP
GO:0006083	acetate metabolic process	biological_process	9	1	6654	6	26712	0.820772	1	0	UP
GO:0010321	regulation of vegetative phase change	biological_process	8	1	6654	6	26712	0.820772	0	1	DOWN
GO:0004634	phosphopyruvate hydratase activity	molecular_function	7	1	6654	6	26712	0.820772	1	0	UP
GO:0030155	regulation of cell adhesion	biological_process	5	1	6654	6	26712	0.820772	0	1	DOWN
GO:0030897	HOPS complex	cellular_component	5	1	6654	6	26712	0.820772	0	1	DOWN
GO:0030010	establishment of cell polarity	biological_process	6	1	6654	6	26712	0.820772	1	0	UP
GO:0008794	arsenate reductase (glutaredoxin) activity	molecular_function	6	1	6654	6	26712	0.820772	1	0	UP
GO:0006415	translational termination	biological_process	8	1	6654	6	26712	0.820772	0	1	DOWN
GO:0005811	lipid particle	cellular_component	9	3	6654	17	26712	0.834332	0	3	DOWN
GO:0007155	cell adhesion	biological_process	4	3	6654	17	26712	0.834332	0	3	DOWN
GO:0016279	protein-lysine N-methyltransferase activity	molecular_function	9	3	6654	17	26712	0.834332	0	3	DOWN
GO:0008327	methyl-CpG binding	molecular_function	6	3	6654	17	26712	0.834332	0	3	DOWN
GO:0007005	mitochondrion organization	biological_process	5	4	6654	22	26712	0.835388	4	0	UP
GO:0030515	snoRNA binding	molecular_function	7	4	6654	22	26712	0.835388	4	0	UP
GO:0004693	cyclin-dependent protein serine/threonine kinase activity	molecular_function	9	5	6654	27	26712	0.839273	0	5	DOWN
GO:0034314	Arp2/3 complex-mediated actin nucleation	biological_process	13	2	6654	12	26712	0.840003	0	2	DOWN
GO:0045549	9-cis-epoxycarotenoid dioxygenase activity	molecular_function	8	2	6654	12	26712	0.840003	0	2	DOWN
GO:0050826	response to freezing	biological_process	6	2	6654	12	26712	0.840003	0	2	DOWN
GO:0045252	oxoglutarate dehydrogenase complex	cellular_component	11	2	6654	12	26712	0.840003	2	0	UP
GO:0006097	glyoxylate cycle	biological_process	7	2	6654	12	26712	0.840003	2	0	UP
GO:0031627	telomeric loop formation	biological_process	10	2	6654	12	26712	0.840003	0	2	DOWN
GO:0006986	response to unfolded protein	biological_process	6	2	6654	12	26712	0.840003	2	0	UP
GO:0006999	nuclear pore organization	biological_process	6	2	6654	12	26712	0.840003	0	2	DOWN
GO:0009585	red, far-red light phototransduction	biological_process	8	4	6654	23	26712	0.861038	0	4	DOWN
GO:0008033	tRNA processing	biological_process	11	3	6654	18	26712	0.862934	3	0	UP
GO:0004069	L-aspartate:2-oxoglutarate aminotransferase activity	molecular_function	7	3	6654	18	26712	0.862934	3	0	UP
GO:0008236	serine-type peptidase activity	molecular_function	7	3	6654	18	26712	0.862934	0	3	DOWN
GO:0009113	purine nucleobase biosynthetic process	biological_process	10	1	6654	7	26712	0.865428	1	0	UP
GO:0019752	carboxylic acid metabolic process	biological_process	7	1	6654	7	26712	0.865428	1	0	UP
GO:0004823	leucine-tRNA ligase activity	molecular_function	8	1	6654	7	26712	0.865428	0	1	DOWN
GO:0010201	response to continuous far red light stimulus by the high-irradiance response system	biological_process	9	1	6654	7	26712	0.865428	0	1	DOWN
GO:0000727	double-strand break repair via break-induced replication	biological_process	12	1	6654	7	26712	0.865428	0	1	DOWN
GO:0006572	tyrosine catabolic process	biological_process	9	1	6654	7	26712	0.865428	1	0	UP
GO:0009088	threonine biosynthetic process	biological_process	10	1	6654	7	26712	0.865428	1	0	UP
GO:0005247	voltage-gated chloride channel activity	molecular_function	11	1	6654	7	26712	0.865428	0	1	DOWN
GO:0070125	mitochondrial translational elongation	biological_process	9	1	6654	7	26712	0.865428	1	0	UP
GO:2001070	starch binding	molecular_function	6	1	6654	7	26712	0.865428	1	0	UP
GO:0004812	aminoacyl-tRNA ligase activity	molecular_function	7	1	6654	7	26712	0.865428	1	0	UP
GO:0009249	protein lipoylation	biological_process	9	1	6654	7	26712	0.865428	0	1	DOWN
GO:0010424	DNA methylation on cytosine within a CG sequence	biological_process	13	1	6654	7	26712	0.865428	0	1	DOWN
GO:0071051	polyadenylation-dependent snoRNA 3'-end processing	biological_process	13	1	6654	7	26712	0.865428	1	0	UP
GO:0005746	mitochondrial respiratory chain	cellular_component	14	1	6654	7	26712	0.865428	1	0	UP
GO:0006384	transcription initiation from RNA polymerase III promoter	biological_process	10	1	6654	7	26712	0.865428	0	1	DOWN
GO:0008175	tRNA methyltransferase activity	molecular_function	8	1	6654	7	26712	0.865428	0	1	DOWN
GO:0004024	alcohol dehydrogenase activity, zinc-dependent	molecular_function	8	1	6654	7	26712	0.865428	1	0	UP
GO:0052691	UDP-arabinopyranose mutase activity	molecular_function	6	1	6654	7	26712	0.865428	0	1	DOWN
GO:0046166	glyceraldehyde-3-phosphate biosynthetic process	biological_process	7	1	6654	7	26712	0.865428	1	0	UP
GO:0009299	mRNA transcription	biological_process	11	1	6654	7	26712	0.865428	0	1	DOWN
GO:0016591	DNA-directed RNA polymerase II, holoenzyme	cellular_component	10	1	6654	7	26712	0.865428	0	1	DOWN
GO:0015937	coenzyme A biosynthetic process	biological_process	11	1	6654	7	26712	0.865428	1	0	UP
GO:0004607	phosphatidylcholine-sterol O-acyltransferase activity	molecular_function	8	1	6654	7	26712	0.865428	0	1	DOWN
GO:0003896	DNA primase activity	molecular_function	9	1	6654	7	26712	0.865428	0	1	DOWN
GO:0000777	condensed chromosome kinetochore	cellular_component	10	1	6654	7	26712	0.865428	0	1	DOWN
GO:0006104	succinyl-CoA metabolic process	biological_process	8	1	6654	7	26712	0.865428	1	0	UP
GO:0006401	RNA catabolic process	biological_process	8	1	6654	7	26712	0.865428	0	1	DOWN
GO:0019781	NEDD8 activating enzyme activity	molecular_function	7	1	6654	7	26712	0.865428	0	1	DOWN
GO:0052543	callose deposition in cell wall	biological_process	8	1	6654	7	26712	0.865428	1	0	UP
GO:0032182	ubiquitin-like protein binding	molecular_function	5	1	6654	7	26712	0.865428	1	0	UP
GO:0006429	leucyl-tRNA aminoacylation	biological_process	13	1	6654	7	26712	0.865428	0	1	DOWN
GO:0019788	NEDD8 transferase activity	molecular_function	6	1	6654	7	26712	0.865428	1	0	UP
GO:0010483	pollen tube reception	biological_process	6	1	6654	7	26712	0.865428	0	1	DOWN
GO:0019419	sulfate reduction	biological_process	6	1	6654	7	26712	0.865428	1	0	UP
GO:0006105	succinate metabolic process	biological_process	9	1	6654	7	26712	0.865428	1	0	UP
GO:0035145	exon-exon junction complex	cellular_component	11	1	6654	7	26712	0.865428	0	1	DOWN
GO:0071805	potassium ion transmembrane transport	biological_process	7	1	6654	7	26712	0.865428	1	0	UP
GO:0033356	UDP-L-arabinose metabolic process	biological_process	11	1	6654	7	26712	0.865428	0	1	DOWN
GO:0051731	polynucleotide 5'-hydroxyl-kinase activity	molecular_function	8	1	6654	7	26712	0.865428	1	0	UP
GO:0009252	peptidoglycan biosynthetic process	biological_process	9	1	6654	7	26712	0.865428	0	1	DOWN
GO:0004449	isocitrate dehydrogenase (NAD+) activity	molecular_function	8	1	6654	7	26712	0.865428	1	0	UP
GO:0051103	DNA ligation involved in DNA repair	biological_process	10	1	6654	7	26712	0.865428	0	1	DOWN
GO:0015930	glutamate synthase activity	molecular_function	6	1	6654	7	26712	0.865428	1	0	UP
GO:0006048	UDP-N-acetylglucosamine biosynthetic process	biological_process	11	1	6654	7	26712	0.865428	0	1	DOWN
GO:0008173	RNA methyltransferase activity	molecular_function	7	1	6654	7	26712	0.865428	0	1	DOWN
GO:0032875	regulation of DNA endoreduplication	biological_process	12	1	6654	7	26712	0.865428	0	1	DOWN
GO:0003841	1-acylglycerol-3-phosphate O-acyltransferase activity	molecular_function	9	1	6654	7	26712	0.865428	0	1	DOWN
GO:0005483	soluble NSF attachment protein activity	molecular_function	5	1	6654	7	26712	0.865428	0	1	DOWN
GO:0004801	sedoheptulose-7-phosphate:D-glyceraldehyde-3-phosphate glyceronetransferase activity	molecular_function	6	1	6654	7	26712	0.865428	1	0	UP
GO:0006450	regulation of translational fidelity	biological_process	10	1	6654	7	26712	0.865428	0	1	DOWN
GO:0004775	succinate-CoA ligase (ADP-forming) activity	molecular_function	8	1	6654	7	26712	0.865428	1	0	UP
GO:0006066	alcohol metabolic process	biological_process	6	1	6654	7	26712	0.865428	0	1	DOWN
GO:0051443	positive regulation of ubiquitin-protein transferase activity	biological_process	13	1	6654	7	26712	0.865428	1	0	UP
GO:0001934	positive regulation of protein phosphorylation	biological_process	10	1	6654	7	26712	0.865428	1	0	UP
GO:0016618	hydroxypyruvate reductase activity	molecular_function	7	1	6654	7	26712	0.865428	0	1	DOWN
GO:0046654	tetrahydrofolate biosynthetic process	biological_process	9	1	6654	7	26712	0.865428	1	0	UP
GO:0000973	posttranscriptional tethering of RNA polymerase II gene DNA at nuclear periphery	biological_process	7	1	6654	7	26712	0.865428	0	1	DOWN
GO:0047627	adenylylsulfatase activity	molecular_function	7	1	6654	7	26712	0.865428	0	1	DOWN
GO:0050373	UDP-arabinose 4-epimerase activity	molecular_function	7	1	6654	7	26712	0.865428	0	1	DOWN
GO:1900111	positive regulation of histone H3-K9 dimethylation	biological_process	10	1	6654	7	26712	0.865428	0	1	DOWN
GO:0000492	box C/D snoRNP assembly	biological_process	10	1	6654	7	26712	0.865428	1	0	UP
GO:0003688	DNA replication origin binding	molecular_function	8	1	6654	7	26712	0.865428	0	1	DOWN
GO:0003994	aconitate hydratase activity	molecular_function	7	1	6654	7	26712	0.865428	1	0	UP
GO:0004807	triose-phosphate isomerase activity	molecular_function	7	1	6654	7	26712	0.865428	1	0	UP
GO:0019201	nucleotide kinase activity	molecular_function	8	1	6654	7	26712	0.865428	0	1	DOWN
GO:0006221	pyrimidine nucleotide biosynthetic process	biological_process	10	1	6654	7	26712	0.865428	0	1	DOWN
GO:0018315	molybdenum incorporation into molybdenum-molybdopterin complex	biological_process	9	1	6654	7	26712	0.865428	1	0	UP
GO:0016120	carotene biosynthetic process	biological_process	8	1	6654	7	26712	0.865428	0	1	DOWN
GO:0051205	protein insertion into membrane	biological_process	7	1	6654	7	26712	0.865428	0	1	DOWN
GO:0004853	uroporphyrinogen decarboxylase activity	molecular_function	7	1	6654	7	26712	0.865428	0	1	DOWN
GO:0005884	actin filament	cellular_component	11	1	6654	7	26712	0.865428	0	1	DOWN
GO:0006086	acetyl-CoA biosynthetic process from pyruvate	biological_process	9	2	6654	13	26712	0.871869	0	2	DOWN
GO:0007140	male meiosis	biological_process	6	2	6654	13	26712	0.871869	0	2	DOWN
GO:0000976	transcription regulatory region sequence-specific DNA binding	molecular_function	9	2	6654	13	26712	0.871869	2	0	UP
GO:0009704	de-etiolation	biological_process	8	2	6654	13	26712	0.871869	0	2	DOWN
GO:0008142	oxysterol binding	molecular_function	7	2	6654	13	26712	0.871869	0	2	DOWN
GO:1900150	regulation of defense response to fungus	biological_process	8	2	6654	13	26712	0.871869	2	0	UP
GO:0004430	1-phosphatidylinositol 4-kinase activity	molecular_function	8	2	6654	13	26712	0.871869	2	0	UP
GO:0006596	polyamine biosynthetic process	biological_process	9	2	6654	13	26712	0.871869	0	2	DOWN
GO:0005885	Arp2/3 protein complex	cellular_component	11	2	6654	13	26712	0.871869	0	2	DOWN
GO:0010332	response to gamma radiation	biological_process	7	2	6654	13	26712	0.871869	0	2	DOWN
GO:0000788	nuclear nucleosome	cellular_component	13	5	6654	29	26712	0.882701	0	5	DOWN
GO:0016853	isomerase activity	molecular_function	4	5	6654	29	26712	0.882701	0	5	DOWN
GO:0006402	mRNA catabolic process	biological_process	9	3	6654	19	26712	0.887095	3	0	UP
GO:0031428	box C/D snoRNP complex	cellular_component	9	2	6654	14	26712	0.897791	2	0	UP
GO:0009590	detection of gravity	biological_process	6	2	6654	14	26712	0.897791	0	2	DOWN
GO:0016149	translation release factor activity, codon specific	molecular_function	10	2	6654	14	26712	0.897791	0	2	DOWN
GO:0006814	sodium ion transport	biological_process	8	2	6654	14	26712	0.897791	0	2	DOWN
GO:0003747	translation release factor activity	molecular_function	9	2	6654	14	26712	0.897791	0	2	DOWN
GO:0005740	mitochondrial envelope	cellular_component	11	2	6654	14	26712	0.897791	2	0	UP
GO:0009423	chorismate biosynthetic process	biological_process	9	2	6654	14	26712	0.897791	2	0	UP
GO:0033365	protein localization to organelle	biological_process	7	1	6654	8	26712	0.898959	1	0	UP
GO:0000922	spindle pole	cellular_component	10	1	6654	8	26712	0.898959	0	1	DOWN
GO:0071028	nuclear mRNA surveillance	biological_process	11	1	6654	8	26712	0.898959	1	0	UP
GO:0006273	lagging strand elongation	biological_process	12	1	6654	8	26712	0.898959	0	1	DOWN
GO:0035312	5'-3' exodeoxyribonuclease activity	molecular_function	10	1	6654	8	26712	0.898959	0	1	DOWN
GO:0008686	3,4-dihydroxy-2-butanone-4-phosphate synthase activity	molecular_function	6	1	6654	8	26712	0.898959	1	0	UP
GO:0000380	alternative mRNA splicing, via spliceosome	biological_process	12	1	6654	8	26712	0.898959	1	0	UP
GO:0043067	regulation of programmed cell death	biological_process	7	1	6654	8	26712	0.898959	0	1	DOWN
GO:0010445	nuclear dicing body	cellular_component	14	1	6654	8	26712	0.898959	1	0	UP
GO:0051555	flavonol biosynthetic process	biological_process	8	1	6654	8	26712	0.898959	0	1	DOWN
GO:0032586	protein storage vacuole membrane	cellular_component	12	1	6654	8	26712	0.898959	1	0	UP
GO:0000301	retrograde transport, vesicle recycling within Golgi	biological_process	8	1	6654	8	26712	0.898959	1	0	UP
GO:0000419	DNA-directed RNA polymerase V complex	cellular_component	10	1	6654	8	26712	0.898959	0	1	DOWN
GO:0030970	retrograde protein transport, ER to cytosol	biological_process	6	1	6654	8	26712	0.898959	0	1	DOWN
GO:0080117	secondary growth	biological_process	5	1	6654	8	26712	0.898959	0	1	DOWN
GO:0008649	rRNA methyltransferase activity	molecular_function	8	1	6654	8	26712	0.898959	0	1	DOWN
GO:0004075	biotin carboxylase activity	molecular_function	6	1	6654	8	26712	0.898959	1	0	UP
GO:0003983	UTP:glucose-1-phosphate uridylyltransferase activity	molecular_function	9	1	6654	8	26712	0.898959	1	0	UP
GO:0007052	mitotic spindle organization	biological_process	8	1	6654	8	26712	0.898959	1	0	UP
GO:0019676	ammonia assimilation cycle	biological_process	10	1	6654	8	26712	0.898959	1	0	UP
GO:0003910	DNA ligase (ATP) activity	molecular_function	7	1	6654	8	26712	0.898959	0	1	DOWN
GO:0016593	Cdc73/Paf1 complex	cellular_component	11	1	6654	8	26712	0.898959	1	0	UP
GO:0045053	protein retention in Golgi apparatus	biological_process	7	1	6654	8	26712	0.898959	1	0	UP
GO:0000154	rRNA modification	biological_process	12	1	6654	8	26712	0.898959	1	0	UP
GO:0001077	transcriptional activator activity, RNA polymerase II core promoter proximal region sequence-specific binding	molecular_function	7	1	6654	8	26712	0.898959	0	1	DOWN
GO:0046429	4-hydroxy-3-methylbut-2-en-1-yl diphosphate synthase activity	molecular_function	7	1	6654	8	26712	0.898959	1	0	UP
GO:0031365	N-terminal protein amino acid modification	biological_process	8	1	6654	8	26712	0.898959	1	0	UP
GO:0048188	Set1C/COMPASS complex	cellular_component	9	1	6654	8	26712	0.898959	0	1	DOWN
GO:0008514	organic anion transmembrane transporter activity	molecular_function	8	1	6654	8	26712	0.898959	1	0	UP
GO:0006805	xenobiotic metabolic process	biological_process	5	1	6654	8	26712	0.898959	0	1	DOWN
GO:0016831	carboxy-lyase activity	molecular_function	6	1	6654	8	26712	0.898959	1	0	UP
GO:0008420	CTD phosphatase activity	molecular_function	10	1	6654	8	26712	0.898959	0	1	DOWN
GO:0016710	trans-cinnamate 4-monooxygenase activity	molecular_function	7	1	6654	8	26712	0.898959	1	0	UP
GO:0003935	GTP cyclohydrolase II activity	molecular_function	9	1	6654	8	26712	0.898959	1	0	UP
GO:0070940	dephosphorylation of RNA polymerase II C-terminal domain	biological_process	13	1	6654	8	26712	0.898959	0	1	DOWN
GO:0048577	negative regulation of short-day photoperiodism, flowering	biological_process	8	1	6654	8	26712	0.898959	0	1	DOWN
GO:0019563	glycerol catabolic process	biological_process	8	1	6654	8	26712	0.898959	1	0	UP
GO:0080037	negative regulation of cytokinin-activated signaling pathway	biological_process	10	1	6654	8	26712	0.898959	0	1	DOWN
GO:0016121	carotene catabolic process	biological_process	9	1	6654	8	26712	0.898959	0	1	DOWN
GO:0071480	cellular response to gamma radiation	biological_process	8	1	6654	8	26712	0.898959	0	1	DOWN
GO:0000783	nuclear telomere cap complex	cellular_component	13	1	6654	8	26712	0.898959	0	1	DOWN
GO:0042989	sequestering of actin monomers	biological_process	12	1	6654	8	26712	0.898959	0	1	DOWN
GO:0003785	actin monomer binding	molecular_function	7	1	6654	8	26712	0.898959	0	1	DOWN
GO:0051258	protein polymerization	biological_process	9	1	6654	8	26712	0.898959	0	1	DOWN
GO:0004525	ribonuclease III activity	molecular_function	10	5	6654	30	26712	0.900362	0	5	DOWN
GO:0034976	response to endoplasmic reticulum stress	biological_process	6	5	6654	30	26712	0.900362	5	0	UP
GO:0005852	eukaryotic translation initiation factor 3 complex	cellular_component	9	6	6654	35	26712	0.900478	6	0	UP
GO:0000775	chromosome, centromeric region	cellular_component	12	3	6654	20	26712	0.90737	0	3	DOWN
GO:0000059	protein import into nucleus, docking	biological_process	7	3	6654	20	26712	0.90737	0	3	DOWN
GO:0080110	sporopollenin biosynthetic process	biological_process	7	2	6654	15	26712	0.918751	0	2	DOWN
GO:0006014	D-ribose metabolic process	biological_process	9	2	6654	15	26712	0.918751	2	0	UP
GO:0006302	double-strand break repair	biological_process	10	2	6654	15	26712	0.918751	0	2	DOWN
GO:0004747	ribokinase activity	molecular_function	8	2	6654	15	26712	0.918751	2	0	UP
GO:0000381	regulation of alternative mRNA splicing, via spliceosome	biological_process	13	1	6654	9	26712	0.924136	0	1	DOWN
GO:0006626	protein targeting to mitochondrion	biological_process	6	1	6654	9	26712	0.924136	1	0	UP
GO:0004832	valine-tRNA ligase activity	molecular_function	8	1	6654	9	26712	0.924136	0	1	DOWN
GO:0030267	glyoxylate reductase (NADP) activity	molecular_function	7	1	6654	9	26712	0.924136	0	1	DOWN
GO:0004768	stearoyl-CoA 9-desaturase activity	molecular_function	8	1	6654	9	26712	0.924136	1	0	UP
GO:0006777	Mo-molybdopterin cofactor biosynthetic process	biological_process	8	1	6654	9	26712	0.924136	1	0	UP
GO:0016559	peroxisome fission	biological_process	6	1	6654	9	26712	0.924136	0	1	DOWN
GO:1900864	mitochondrial RNA modification	biological_process	10	1	6654	9	26712	0.924136	1	0	UP
GO:0006024	glycosaminoglycan biosynthetic process	biological_process	8	1	6654	9	26712	0.924136	0	1	DOWN
GO:0045335	phagocytic vesicle	cellular_component	12	1	6654	9	26712	0.924136	1	0	UP
GO:0009960	endosperm development	biological_process	5	1	6654	9	26712	0.924136	0	1	DOWN
GO:0070290	N-acylphosphatidylethanolamine-specific phospholipase D activity	molecular_function	8	1	6654	9	26712	0.924136	0	1	DOWN
GO:0006821	chloride transport	biological_process	8	1	6654	9	26712	0.924136	0	1	DOWN
GO:0070370	cellular heat acclimation	biological_process	7	1	6654	9	26712	0.924136	0	1	DOWN
GO:0042793	transcription from plastid promoter	biological_process	11	1	6654	9	26712	0.924136	0	1	DOWN
GO:0009011	starch synthase activity	molecular_function	8	1	6654	9	26712	0.924136	0	1	DOWN
GO:0005776	autophagosome	cellular_component	10	1	6654	9	26712	0.924136	1	0	UP
GO:0030151	molybdenum ion binding	molecular_function	8	1	6654	9	26712	0.924136	1	0	UP
GO:0009298	GDP-mannose biosynthetic process	biological_process	11	1	6654	9	26712	0.924136	0	1	DOWN
GO:0004630	phospholipase D activity	molecular_function	8	1	6654	9	26712	0.924136	0	1	DOWN
GO:0006438	valyl-tRNA aminoacylation	biological_process	13	1	6654	9	26712	0.924136	0	1	DOWN
GO:0005546	phosphatidylinositol-4,5-bisphosphate binding	molecular_function	9	1	6654	9	26712	0.924136	0	1	DOWN
GO:0045903	positive regulation of translational fidelity	biological_process	11	1	6654	9	26712	0.924136	1	0	UP
GO:0004591	oxoglutarate dehydrogenase (succinyl-transferring) activity	molecular_function	7	1	6654	9	26712	0.924136	1	0	UP
GO:0009089	lysine biosynthetic process via diaminopimelate	biological_process	11	1	6654	9	26712	0.924136	1	0	UP
GO:0010082	regulation of root meristem growth	biological_process	10	1	6654	9	26712	0.924136	0	1	DOWN
GO:0008893	guanosine-3',5'-bis(diphosphate) 3'-diphosphatase activity	molecular_function	8	1	6654	9	26712	0.924136	0	1	DOWN
GO:0042023	DNA endoreduplication	biological_process	11	1	6654	9	26712	0.924136	0	1	DOWN
GO:0047334	diphosphate-fructose-6-phosphate 1-phosphotransferase activity	molecular_function	9	1	6654	9	26712	0.924136	0	1	DOWN
GO:0004335	galactokinase activity	molecular_function	8	1	6654	9	26712	0.924136	1	0	UP
GO:0006011	UDP-glucose metabolic process	biological_process	11	1	6654	9	26712	0.924136	1	0	UP
GO:0033201	alpha-1,4-glucan synthase activity	molecular_function	7	1	6654	9	26712	0.924136	0	1	DOWN
GO:0004571	mannosyl-oligosaccharide 1,2-alpha-mannosidase activity	molecular_function	10	1	6654	9	26712	0.924136	0	1	DOWN
GO:0008312	7S RNA binding	molecular_function	7	1	6654	9	26712	0.924136	0	1	DOWN
GO:0046861	glyoxysomal membrane	cellular_component	13	1	6654	9	26712	0.924136	1	0	UP
GO:0035999	tetrahydrofolate interconversion	biological_process	9	1	6654	9	26712	0.924136	0	1	DOWN
GO:1990316	ATG1/ULK1 kinase complex	cellular_component	9	1	6654	9	26712	0.924136	1	0	UP
GO:0000164	protein phosphatase type 1 complex	cellular_component	9	1	6654	9	26712	0.924136	0	1	DOWN
GO:0019013	viral nucleocapsid	cellular_component	5	1	6654	9	26712	0.924136	1	0	UP
GO:0009097	isoleucine biosynthetic process	biological_process	9	3	6654	21	26712	0.924284	3	0	UP
GO:0051017	actin filament bundle assembly	biological_process	9	3	6654	21	26712	0.924284	0	3	DOWN
GO:0010197	polar nucleus fusion	biological_process	7	2	6654	16	26712	0.935612	0	2	DOWN
GO:0000710	meiotic mismatch repair	biological_process	7	2	6654	16	26712	0.935612	0	2	DOWN
GO:0004300	enoyl-CoA hydratase activity	molecular_function	7	2	6654	16	26712	0.935612	2	0	UP
GO:0006790	sulfur compound metabolic process	biological_process	5	2	6654	16	26712	0.935612	0	2	DOWN
GO:0006312	mitotic recombination	biological_process	10	2	6654	16	26712	0.935612	0	2	DOWN
GO:0004165	dodecenoyl-CoA delta-isomerase activity	molecular_function	7	2	6654	16	26712	0.935612	2	0	UP
GO:0031348	negative regulation of defense response	biological_process	7	2	6654	16	26712	0.935612	0	2	DOWN
GO:0006333	chromatin assembly or disassembly	biological_process	7	3	6654	22	26712	0.93832	0	3	DOWN
GO:0004743	pyruvate kinase activity	molecular_function	7	3	6654	22	26712	0.93832	3	0	UP
GO:0031426	polycistronic mRNA processing	biological_process	11	3	6654	22	26712	0.93832	3	0	UP
GO:0003840	gamma-glutamyltransferase activity	molecular_function	7	1	6654	10	26712	0.94304	1	0	UP
GO:0004362	glutathione-disulfide reductase activity	molecular_function	7	1	6654	10	26712	0.94304	1	0	UP
GO:0003724	RNA helicase activity	molecular_function	10	1	6654	10	26712	0.94304	0	1	DOWN
GO:0008235	metalloexopeptidase activity	molecular_function	8	1	6654	10	26712	0.94304	1	0	UP
GO:0008374	O-acyltransferase activity	molecular_function	7	1	6654	10	26712	0.94304	0	1	DOWN
GO:0051693	actin filament capping	biological_process	12	1	6654	10	26712	0.94304	0	1	DOWN
GO:0051276	chromosome organization	biological_process	5	1	6654	10	26712	0.94304	0	1	DOWN
GO:0006610	ribosomal protein import into nucleus	biological_process	7	1	6654	10	26712	0.94304	0	1	DOWN
GO:0042800	histone methyltransferase activity (H3-K4 specific)	molecular_function	11	1	6654	10	26712	0.94304	0	1	DOWN
GO:0061088	regulation of sequestering of zinc ion	biological_process	13	1	6654	10	26712	0.94304	0	1	DOWN
GO:0018444	translation release factor complex	cellular_component	9	1	6654	10	26712	0.94304	0	1	DOWN
GO:0036374	glutathione hydrolase activity	molecular_function	9	1	6654	10	26712	0.94304	1	0	UP
GO:0051568	histone H3-K4 methylation	biological_process	9	1	6654	10	26712	0.94304	1	0	UP
GO:0016024	CDP-diacylglycerol biosynthetic process	biological_process	8	1	6654	10	26712	0.94304	0	1	DOWN
GO:0031897	Tic complex	cellular_component	15	1	6654	10	26712	0.94304	1	0	UP
GO:0033353	S-adenosylmethionine cycle	biological_process	12	1	6654	10	26712	0.94304	1	0	UP
GO:0008275	gamma-tubulin small complex	cellular_component	11	1	6654	10	26712	0.94304	0	1	DOWN
GO:0030527	structural constituent of chromatin	molecular_function	4	1	6654	10	26712	0.94304	0	1	DOWN
GO:0018812	3-hydroxyacyl-CoA dehydratase activity	molecular_function	7	1	6654	10	26712	0.94304	1	0	UP
GO:0035242	protein-arginine omega-N asymmetric methyltransferase activity	molecular_function	10	1	6654	10	26712	0.94304	1	0	UP
GO:0016906	sterol 3-beta-glucosyltransferase activity	molecular_function	8	1	6654	10	26712	0.94304	0	1	DOWN
GO:0048528	post-embryonic root development	biological_process	7	1	6654	10	26712	0.94304	0	1	DOWN
GO:0034427	nuclear-transcribed mRNA catabolic process, exonucleolytic, 3'-5'	biological_process	12	1	6654	10	26712	0.94304	1	0	UP
GO:0019076	viral release from host cell	biological_process	7	1	6654	10	26712	0.94304	0	1	DOWN
GO:0031491	nucleosome binding	molecular_function	5	1	6654	10	26712	0.94304	1	0	UP
GO:0004602	glutathione peroxidase activity	molecular_function	7	1	6654	10	26712	0.94304	1	0	UP
GO:0000943	retrotransposon nucleocapsid	cellular_component	11	1	6654	10	26712	0.94304	0	1	DOWN
GO:0071470	cellular response to osmotic stress	biological_process	6	1	6654	10	26712	0.94304	1	0	UP
GO:0034475	U4 snRNA 3'-end processing	biological_process	13	1	6654	10	26712	0.94304	1	0	UP
GO:1902584	positive regulation of response to water deprivation	biological_process	6	1	6654	10	26712	0.94304	0	1	DOWN
GO:0000911	cytokinesis by cell plate formation	biological_process	9	4	6654	28	26712	0.943792	0	4	DOWN
GO:0019915	lipid storage	biological_process	6	2	6654	17	26712	0.949116	0	2	DOWN
GO:0006506	GPI anchor biosynthetic process	biological_process	9	2	6654	17	26712	0.949116	0	2	DOWN
GO:0006102	isocitrate metabolic process	biological_process	9	2	6654	17	26712	0.949116	2	0	UP
GO:0043581	mycelium development	biological_process	6	2	6654	17	26712	0.949116	0	2	DOWN
GO:0004784	superoxide dismutase activity	molecular_function	6	2	6654	17	26712	0.949116	0	2	DOWN
GO:0008865	fructokinase activity	molecular_function	9	2	6654	17	26712	0.949116	2	0	UP
GO:0010020	chloroplast fission	biological_process	7	3	6654	23	26712	0.949912	0	3	DOWN
GO:0006270	DNA replication initiation	biological_process	11	3	6654	23	26712	0.949912	0	3	DOWN
GO:0030422	production of siRNA involved in RNA interference	biological_process	12	7	6654	45	26712	0.954264	0	7	DOWN
GO:0051117	ATPase binding	molecular_function	6	1	6654	11	26712	0.957234	1	0	UP
GO:0003906	DNA-(apurinic or apyrimidinic site) lyase activity	molecular_function	9	1	6654	11	26712	0.957234	0	1	DOWN
GO:0048868	pollen tube development	biological_process	5	1	6654	11	26712	0.957234	1	0	UP
GO:0006303	double-strand break repair via nonhomologous end joining	biological_process	11	1	6654	11	26712	0.957234	0	1	DOWN
GO:0002184	cytoplasmic translational termination	biological_process	9	1	6654	11	26712	0.957234	0	1	DOWN
GO:0000162	tryptophan biosynthetic process	biological_process	9	1	6654	11	26712	0.957234	1	0	UP
GO:0016756	glutathione gamma-glutamylcysteinyltransferase activity	molecular_function	7	1	6654	11	26712	0.957234	1	0	UP
GO:0006207	'de novo' pyrimidine nucleobase biosynthetic process	biological_process	11	1	6654	11	26712	0.957234	1	0	UP
GO:0030915	Smc5-Smc6 complex	cellular_component	11	1	6654	11	26712	0.957234	1	0	UP
GO:0019761	glucosinolate biosynthetic process	biological_process	9	1	6654	11	26712	0.957234	0	1	DOWN
GO:0005085	guanyl-nucleotide exchange factor activity	molecular_function	3	1	6654	11	26712	0.957234	0	1	DOWN
GO:0009378	four-way junction helicase activity	molecular_function	11	1	6654	11	26712	0.957234	1	0	UP
GO:0040029	regulation of gene expression, epigenetic	biological_process	8	1	6654	11	26712	0.957234	0	1	DOWN
GO:0000276	mitochondrial proton-transporting ATP synthase complex, coupling factor F(o)	cellular_component	15	1	6654	11	26712	0.957234	1	0	UP
GO:0003989	acetyl-CoA carboxylase activity	molecular_function	7	1	6654	11	26712	0.957234	0	1	DOWN
GO:0006419	alanyl-tRNA aminoacylation	biological_process	13	1	6654	11	26712	0.957234	0	1	DOWN
GO:0009657	plastid organization	biological_process	5	1	6654	11	26712	0.957234	0	1	DOWN
GO:0008652	cellular amino acid biosynthetic process	biological_process	7	1	6654	11	26712	0.957234	0	1	DOWN
GO:0001522	pseudouridine synthesis	biological_process	10	1	6654	11	26712	0.957234	1	0	UP
GO:0007346	regulation of mitotic cell cycle	biological_process	7	1	6654	11	26712	0.957234	0	1	DOWN
GO:0097602	cullin family protein binding	molecular_function	5	1	6654	11	26712	0.957234	1	0	UP
GO:0000105	histidine biosynthetic process	biological_process	8	1	6654	11	26712	0.957234	0	1	DOWN
GO:0045927	positive regulation of growth	biological_process	5	1	6654	11	26712	0.957234	0	1	DOWN
GO:0071782	endoplasmic reticulum tubular network	cellular_component	11	1	6654	11	26712	0.957234	1	0	UP
GO:0004096	catalase activity	molecular_function	7	1	6654	11	26712	0.957234	1	0	UP
GO:0008469	histone-arginine N-methyltransferase activity	molecular_function	10	1	6654	11	26712	0.957234	1	0	UP
GO:0032197	transposition, RNA-mediated	biological_process	6	1	6654	11	26712	0.957234	0	1	DOWN
GO:0004813	alanine-tRNA ligase activity	molecular_function	8	1	6654	11	26712	0.957234	0	1	DOWN
GO:0007126	meiotic nuclear division	biological_process	5	3	6654	24	26712	0.959445	0	3	DOWN
GO:0017056	structural constituent of nuclear pore	molecular_function	4	3	6654	24	26712	0.959445	0	3	DOWN
GO:0004721	phosphoprotein phosphatase activity	molecular_function	8	9	6654	56	26712	0.959717	0	9	DOWN
GO:0006813	potassium ion transport	biological_process	8	2	6654	18	26712	0.959889	2	0	UP
GO:0051085	chaperone mediated protein folding requiring cofactor	biological_process	10	2	6654	18	26712	0.959889	2	0	UP
GO:0005905	clathrin-coated pit	cellular_component	5	2	6654	18	26712	0.959889	0	2	DOWN
GO:0006094	gluconeogenesis	biological_process	9	4	6654	30	26712	0.961751	4	0	UP
GO:0004702	receptor signaling protein serine/threonine kinase activity	molecular_function	9	6	6654	41	26712	0.962625	0	6	DOWN
GO:0007030	Golgi organization	biological_process	5	3	6654	25	26712	0.967252	3	0	UP
GO:0000422	mitophagy	biological_process	7	1	6654	12	26712	0.967892	0	1	DOWN
GO:0097428	protein maturation by iron-sulfur cluster transfer	biological_process	7	1	6654	12	26712	0.967892	0	1	DOWN
[truncated: 1,380 more rows]

## Sheet: (b) Genes
GO annotation of DEGs
GO_ID	GO_Term	GO_Function	GO_Level	pvalue	Gene_ID	log2FC	regulation	Name	Annotation	Calli_1_TPM	Calli_2_TPM	Calli_3_TPM	Tissue1_TPM	Tissue2_TPM	Tissue3_TPM	Callis_mean_TPM	Tissues_mean_TPM
GO:0007165	signal transduction	biological_process	6	0	TRINITY_DN33013_c0_g1	-9.5991	down	At5g02620	PREDICTED: ankyrin repeat-containing protein At5g02620 [Gossypium raimondii]	0	0	0	6.72	5.86	2.68	0	5.09
GO:0007165	signal transduction	biological_process	6	0	TRINITY_DN33022_c0_g4	-3.98669	down	-	PREDICTED: protein ACCELERATED CELL DEATH 6-like [Phoenix dactylifera]	0	0	0.55	2.9	5.3	5.15	0.18	4.45
GO:0007165	signal transduction	biological_process	6	0	TRINITY_DN33283_c0_g4	2.12282	up	TIR	predicted protein [Physcomitrella patens]	0.96	1.76	1.88	0.65	0.71	0.41	1.53	0.59
GO:0007165	signal transduction	biological_process	6	0	TRINITY_DN33902_c1_g3	-3.11704	down	-	unknown [Picea sitchensis]	0.14	0.12	0.11	2.37	1.43	1.09	0.12	1.63
GO:0007165	signal transduction	biological_process	6	0	TRINITY_DN33933_c0_g1	1.75297	up	GSO1	PREDICTED: receptor-like protein 12 [Ziziphus jujuba]	0.4	1.18	0.65	0.67	0.28	0.14	0.74	0.36
GO:0007165	signal transduction	biological_process	6	0	TRINITY_DN34151_c0_g1	-4.39599	down	SERK2	unknown [Picea sitchensis]	0.69	1.1	1.86	33.15	47.71	42.8	1.22	41.22
GO:0007165	signal transduction	biological_process	6	0	TRINITY_DN34213_c0_g1	7.85306	up	-	unknown [Picea sitchensis]	11.22	23.04	12.57	0	0.15	0.18	15.61	0.11
GO:0007165	signal transduction	biological_process	6	0	TRINITY_DN34264_c0_g2	-3.16451	down	CDC20-1	cell division control 20-1 [Solanum lycopersicum]	0.05	0.05	0.19	4.56	2.68	3.73	0.1	3.66
GO:0007165	signal transduction	biological_process	6	0	TRINITY_DN34281_c0_g1	1.28176	up	LAZ5	NBS/LRR, partial [Pinus taeda]	2.72	2.61	1.11	1.63	1.47	1.59	2.15	1.56
GO:0007165	signal transduction	biological_process	6	0	TRINITY_DN34286_c0_g4	1.26193	up	CIPK5	unknown [Picea sitchensis]	8.15	17.47	18.79	9.48	11.02	10.47	14.8	10.32
GO:0007165	signal transduction	biological_process	6	0	TRINITY_DN34286_c0_g5	-1.91472	down	CIPK5	unknown [Picea sitchensis]	0.12	0.2	0.26	1.09	1.33	1.26	0.19	1.23
GO:0007165	signal transduction	biological_process	6	0	TRINITY_DN34560_c0_g3	-4.36911	down	TAO1	predicted protein [Physcomitrella patens]	0.04	0.22	0.42	8.51	7.06	7.94	0.23	7.84
GO:0007165	signal transduction	biological_process	6	0	TRINITY_DN34560_c0_g4	-8.46596	down	TAO1	hypothetical protein POPTR_0004s08710g [Populus trichocarpa]	0	0	0.02	14.87	11.22	15.23	0.01	13.77
GO:0007165	signal transduction	biological_process	6	0	TRINITY_DN34593_c0_g1	-4.00244	down	RGA2	unknown [Picea sitchensis]	0.1	0.81	0.09	8.93	9.15	9.66	0.33	9.25
GO:0007165	signal transduction	biological_process	6	0	TRINITY_DN34714_c0_g2	-1.94498	down	-	PREDICTED: uncharacterized protein LOC103710361 [Phoenix dactylifera]	0.38	1.08	0.86	4.96	4.82	5.08	0.77	4.95
GO:0007165	signal transduction	biological_process	6	0	TRINITY_DN34731_c0_g1	-1.88958	down	RCH1	PREDICTED: probable leucine-rich repeat receptor-like protein kinase At1g35710 [Cucumis sativus]	0.95	2.34	1.62	11.29	8.32	10.53	1.64	10.05
GO:0007165	signal transduction	biological_process	6	0	TRINITY_DN34731_c0_g2	-1.51809	down	RLP12	PREDICTED: receptor-like protein 12 [Theobroma cacao]	1.29	2.21	2.52	8.28	8.02	6.92	2.01	7.74
GO:0007165	signal transduction	biological_process	6	0	TRINITY_DN34738_c5_g1	2.27972	up	TAO1	disease resistance protein (TIR-NBS-LRR class) [Arabidopsis thaliana]	0.58	0.69	1.22	0.38	0.15	0.34	0.83	0.29
GO:0007165	signal transduction	biological_process	6	0	TRINITY_DN35397_c0_g1	1.43679	up	LPP2	Putative lipid phosphate phosphatase 3, chloroplastic, partial [Anthurium amnicola]	5.54	8.14	4.78	4.44	4.36	2.87	6.15	3.89
GO:0007165	signal transduction	biological_process	6	0	TRINITY_DN35560_c0_g1	-1.1441	down	BIR2	unknown [Picea sitchensis]	7.58	14.17	16.75	45.93	49.44	47.87	12.83	47.75
GO:0007165	signal transduction	biological_process	6	0	TRINITY_DN35650_c2_g1	-3.12068	down	PLC7	PREDICTED: phosphoinositide phospholipase C 2 isoform X2 [Eucalyptus grandis]	0.89	5.73	1.57	9.83	10.19	11.37	2.73	10.46
GO:0007165	signal transduction	biological_process	6	0	TRINITY_DN35840_c0_g2	-1.55069	down	ORP1C	PREDICTED: oxysterol-binding protein-related protein 1C-like isoform X2 [Elaeis guineensis]	0.57	0.96	0.93	4.52	4.63	3.07	0.82	4.07
GO:0007165	signal transduction	biological_process	6	0	TRINITY_DN35947_c0_g1	-10.7437	down	At5g02620	PREDICTED: ankyrin repeat-containing protein At5g02620-like isoform X1 [Populus euphratica]	0	0	0	3.86	4.23	3.93	0	4.01
GO:0007165	signal transduction	biological_process	6	0	TRINITY_DN36069_c0_g1	-8.76922	down	-	PREDICTED: TMV resistance protein N-like [Arachis ipaensis]	0	0	0	9.16	5.72	5.15	0	6.68
GO:0007165	signal transduction	biological_process	6	0	TRINITY_DN36203_c0_g2	-6.89956	down	TAO1	unknown [Picea sitchensis]	0.01	0.04	0.02	5.04	4.22	4.83	0.02	4.7
GO:0007165	signal transduction	biological_process	6	0	TRINITY_DN36263_c0_g1	-3.77086	down	WRKY16	NBS/LRR, partial [Pinus taeda]	0	0.52	0.03	5.37	7.26	6.04	0.18	6.22
GO:0007165	signal transduction	biological_process	6	0	TRINITY_DN36399_c0_g2	-2.02219	down	-	NB-ARC [Pinus tabuliformis]	1.04	2.84	1.63	13.27	7.12	14.85	1.84	11.75
GO:0007165	signal transduction	biological_process	6	0	TRINITY_DN36655_c0_g1	-1.29049	down	HISN7	unknown [Picea sitchensis]	2.54	4.86	7.12	14.85	20.81	19.74	4.84	18.47
GO:0007165	signal transduction	biological_process	6	0	TRINITY_DN37268_c0_g3	-1.59697	down	PLC2	unknown [Picea sitchensis]	11.56	16.36	15.3	60.53	68.54	66.26	14.41	65.11
GO:0007165	signal transduction	biological_process	6	0	TRINITY_DN37804_c0_g1	-1.81361	down	RCH1	PREDICTED: LRR receptor-like serine/threonine-protein kinase FLS2 [Phoenix dactylifera]	0.24	1.58	1.54	5.8	5.73	6.65	1.12	6.06
GO:0007165	signal transduction	biological_process	6	0	TRINITY_DN37830_c0_g1	-5.5339	down	BAM2	PREDICTED: LRR receptor-like serine/threonine-protein kinase RCH1 [Phoenix dactylifera]	0	0	0.09	3.57	3.12	2.41	0.03	3.03
GO:0007165	signal transduction	biological_process	6	0	TRINITY_DN37948_c3_g3	-1.53856	down	LRRD1	unknown [Picea sitchensis]	1.98	3.29	1.77	11.41	9.49	12.89	2.35	11.26
GO:0007165	signal transduction	biological_process	6	0	TRINITY_DN37948_c3_g4	5.27872	up	RPP1	unknown [Picea sitchensis]	3.42	4.87	10.94	0.72	0.05	0.04	6.41	0.27
GO:0007165	signal transduction	biological_process	6	0	TRINITY_DN38009_c0_g1	-1.6387	down	RLP12	PREDICTED: LRR receptor-like serine/threonine-protein kinase FLS2 [Gossypium raimondii]	1.61	6.44	4.31	20.2	17.91	19.81	4.12	19.31
GO:0007165	signal transduction	biological_process	6	0	TRINITY_DN38009_c0_g3	-2.3882	down	PXC2	PREDICTED: receptor-like protein 12 [Amborella trichopoda]	0.51	0.92	0.15	4.81	4.48	5.18	0.53	4.82
GO:0007165	signal transduction	biological_process	6	0	TRINITY_DN38222_c0_g2	-3.90476	down	-	unknown [Picea sitchensis]	0.14	0.12	0.06	2.7	2.09	1.21	0.11	2
GO:0007165	signal transduction	biological_process	6	0	TRINITY_DN38222_c0_g4	1.05148	up	WRKY19	NB-ARC [Pinus tabuliformis]	0.88	0.89	0.95	0.64	0.82	0.79	0.91	0.75
GO:0007165	signal transduction	biological_process	6	0	TRINITY_DN38333_c3_g1	2.16973	up	-	PREDICTED: TMV resistance protein N [Amborella trichopoda]	0.73	1.23	1.39	0.57	0.32	0.37	1.12	0.42
GO:0007165	signal transduction	biological_process	6	0	TRINITY_DN38366_c0_g2	-8.75888	down	At5g02620	PREDICTED: ankyrin repeat-containing protein At5g02620 [Vitis vinifera]	0.01	0	0.01	4.64	4.78	4.63	0.01	4.68
GO:0007165	signal transduction	biological_process	6	0	TRINITY_DN38466_c2_g2	-1.84156	down	RPP1	unknown [Picea sitchensis]	5.92	11.53	6.72	39.58	50.62	44.7	8.06	44.97
GO:0007165	signal transduction	biological_process	6	0	TRINITY_DN38513_c1_g1	-2.31988	down	-	PREDICTED: WD repeat-containing protein 44 isoform X2 [Theobroma cacao]	1.24	1.96	1.71	13.78	15.48	12.19	1.64	13.82
GO:0007165	signal transduction	biological_process	6	0	TRINITY_DN38529_c1_g1	-5.0092	down	FLS2	LRR receptor-like serine/threonine-protein kinase GSO1 [Ananas comosus]	0.03	0.18	0.03	4.03	4.12	4.6	0.08	4.25
GO:0007165	signal transduction	biological_process	6	0	TRINITY_DN38632_c0_g1	-6.83262	down	-	TIR/NBS, partial [Pinus taeda]	0.19	0.12	1.77	147.37	127.24	94	0.69	122.87
GO:0007165	signal transduction	biological_process	6	0	TRINITY_DN38632_c0_g3	1.6	up	At4g11170	unknown [Picea sitchensis]	1.74	2.49	2.7	1.56	1.32	1.01	2.31	1.3
GO:0007165	signal transduction	biological_process	6	0	TRINITY_DN38695_c0_g1	-1.5376	down	At1g35710	hypothetical protein SELMODRAFT_84581 [Selaginella moellendorffii]	0.21	0.44	0.9	3.14	2.15	2.27	0.52	2.52
GO:0007165	signal transduction	biological_process	6	0	TRINITY_DN26103_c0_g1	1.82564	up	-	unknown [Picea sitchensis]	0.78	1.25	1.61	0.6	0.46	0.75	1.21	0.6
GO:0007165	signal transduction	biological_process	6	0	TRINITY_DN26300_c0_g1	-4.03798	down	TAO1	predicted protein [Physcomitrella patens]	0.01	0.06	0.06	1.48	1.1	1.05	0.04	1.21
GO:0007165	signal transduction	biological_process	6	0	TRINITY_DN26787_c0_g1	-2.41461	down	MIK2	unknown [Picea sitchensis]	0.94	1.19	2.32	12.12	13.96	14.54	1.48	13.54
GO:0007165	signal transduction	biological_process	6	0	TRINITY_DN28348_c0_g3	1.81421	up	FLS2	Leucine-rich repeat-containing protein [Cynara cardunculus var. scolymus]	0.76	1.09	0.73	0.41	0.38	0.46	0.86	0.42
GO:0007165	signal transduction	biological_process	6	0	TRINITY_DN28449_c0_g2	-8.52752	down	TAO1	predicted protein [Physcomitrella patens]	0	0.01	0	2.25	1.95	1.81	0	2
GO:0007165	signal transduction	biological_process	6	0	TRINITY_DN28496_c0_g1	-3.26324	down	At1g34110	PREDICTED: receptor-like protein kinase 2 [Amborella trichopoda]	0.2	1.27	4.26	28.61	32.25	29.33	1.91	30.06
GO:0007165	signal transduction	biological_process	6	0	TRINITY_DN28957_c0_g1	-1.17863	down	WOX4	HD transcription factor [Pinus sylvestris]	1.75	3.87	0.46	5.99	9.22	8	2.03	7.74
GO:0007165	signal transduction	biological_process	6	0	TRINITY_DN29390_c0_g3	6.12179	up	TAO1	predicted protein [Physcomitrella patens]	0.88	1.57	1.39	0.03	0.02	0.04	1.28	0.03
GO:0007165	signal transduction	biological_process	6	0	TRINITY_DN29770_c0_g1	-3.01111	down	RLP51	hypothetical protein SELMODRAFT_13088, partial [Selaginella moellendorffii]	0.08	0.13	0.34	2.74	2.56	2.24	0.18	2.51
GO:0007165	signal transduction	biological_process	6	0	TRINITY_DN30102_c0_g1	2.07497	up	ITN1	PREDICTED: ankyrin repeat-containing protein At5g02620 [Vitis vinifera]	0.73	1.18	1.82	0.63	0.57	0.3	1.24	0.5
GO:0007165	signal transduction	biological_process	6	0	TRINITY_DN30877_c0_g1	-8.40755	down	ITN1	PREDICTED: ankyrin repeat-containing protein NPR4-like [Solanum lycopersicum]	0	0.08	0.03	20.09	19.69	25.57	0.04	21.78
GO:0007165	signal transduction	biological_process	6	0	TRINITY_DN30877_c0_g6	-8.61171	down	ACD6	PREDICTED: protein ACCELERATED CELL DEATH 6 [Eucalyptus grandis]	0	0	0	1.43	0.93	1.38	0	1.25
GO:0007165	signal transduction	biological_process	6	0	TRINITY_DN31360_c0_g1	-2.75214	down	lrrcc1	PREDICTED: TMV resistance protein N-like [Eucalyptus grandis]	0.22	0.68	0.66	5.43	6.81	5.5	0.52	5.91
GO:0007165	signal transduction	biological_process	6	0	TRINITY_DN31360_c0_g2	-2.62972	down	At4g19050	unknown [Picea sitchensis]	0.2	0.57	0.98	5.8	6.5	5.83	0.58	6.04
GO:0007165	signal transduction	biological_process	6	0	TRINITY_DN32295_c0_g1	-1.24645	down	-	unknown [Picea sitchensis]	4.25	5.62	7.6	30.63	24.49	18.11	5.82	24.41
GO:0007165	signal transduction	biological_process	6	0	TRINITY_DN32295_c0_g2	-1.56769	down	MIK1	unknown [Picea sitchensis]	2.08	2.99	4.81	20.46	15.36	13.88	3.29	16.57
GO:0007165	signal transduction	biological_process	6	0	TRINITY_DN32516_c0_g3	2.9411	up	-	PREDICTED: TMV resistance protein N-like [Juglans regia]	0.63	0.62	0.88	0.27	0.07	0.13	0.71	0.16
GO:0007165	signal transduction	biological_process	6	0	TRINITY_DN32770_c1_g6	-4.54809	down	-	putative TIR-NBS-LRR protein [Pinus monticola]	0.02	0.08	0.01	1.25	1.75	1.49	0.04	1.5
GO:0007165	signal transduction	biological_process	6	0	TRINITY_DN32808_c0_g1	-1.14741	down	lrrc57	unknown [Picea sitchensis]	1.56	1.02	0.43	3.78	3.57	2.65	1	3.33
GO:0007165	signal transduction	biological_process	6	0	TRINITY_DN39277_c1_g1	-1.12927	down	-	unknown [Picea sitchensis]	7.49	22.1	15.59	64.49	51.72	48.15	15.06	54.79
GO:0007165	signal transduction	biological_process	6	0	TRINITY_DN39300_c0_g1	-4.2493	down	CIPK5	unknown [Picea sitchensis]	0.63	0.76	1.05	31.71	30.54	17.45	0.81	26.57
GO:0007165	signal transduction	biological_process	6	0	TRINITY_DN39347_c0_g2	-3.47512	down	IMK2	hypothetical protein AMTR_s00103p00029870 [Amborella trichopoda]	0.1	0.19	0.23	4.1	3.19	3.49	0.17	3.59
GO:0007165	signal transduction	biological_process	6	0	TRINITY_DN39395_c1_g1	-1.31968	down	Ank3	PREDICTED: ankyrin repeat-containing protein At5g02620-like [Nelumbo nucifera]	1.2	2.52	0.4	5.27	5.53	6.56	1.37	5.79
GO:0007165	signal transduction	biological_process	6	0	TRINITY_DN39466_c0_g1	1.32886	up	FAB1B	PREDICTED: 1-phosphatidylinositol-3-phosphate 5-kinase FAB1B isoform X2 [Vitis vinifera]	2.74	3.82	2.39	1.84	2.23	2.06	2.98	2.04
GO:0007165	signal transduction	biological_process	6	0	TRINITY_DN39620_c0_g1	-4.57448	down	TMK1	PREDICTED: receptor protein kinase TMK1-like [Phoenix dactylifera]	0.09	0.2	0.34	7.16	8.92	9.06	0.21	8.38
GO:0007165	signal transduction	biological_process	6	0	TRINITY_DN39655_c0_g3	-1.39147	down	CIPK5	unknown [Picea sitchensis]	0.44	0.67	0.71	2.49	3.07	2.69	0.61	2.75
GO:0007165	signal transduction	biological_process	6	0	TRINITY_DN39801_c0_g1	-3.19382	down	EDR2	hypothetical protein AMTR_s00148p00054510 [Amborella trichopoda]	0.96	0.21	0.18	3.24	4.2	2.97	0.45	3.47
GO:0007165	signal transduction	biological_process	6	0	TRINITY_DN39813_c3_g1	-8.41379	down	TAO1	unknown [Picea sitchensis]	0	0	0.01	2.91	3.01	2.69	0	2.87
GO:0007165	signal transduction	biological_process	6	0	TRINITY_DN39923_c2_g3	-7.35758	down	ESAG8	PREDICTED: TMV resistance protein N-like [Eucalyptus grandis]	0.05	0.9	1.34	25.05	19.86	18.75	0.76	21.22
GO:0007165	signal transduction	biological_process	6	0	TRINITY_DN40126_c0_g2	1.54046	up	WRKY19	BnaA09g29610D [Brassica napus]	1.76	1.74	0.95	1.4	1.5	1.26	1.48	1.39
GO:0007165	signal transduction	biological_process	6	0	TRINITY_DN40134_c0_g1	-1.19288	down	RLP51	unknown [Picea sitchensis]	1.31	2.43	3.81	9.62	9.77	9.54	2.52	9.64
GO:0007165	signal transduction	biological_process	6	0	TRINITY_DN40196_c0_g2	-7.6442	down	RPT3	PREDICTED: root phototropism protein 3 [Amborella trichopoda]	0.02	0.02	0.03	4.7	8.51	10.01	0.02	7.74
GO:0007165	signal transduction	biological_process	6	0	TRINITY_DN40283_c0_g1	-1.29798	down	At1g35710	PREDICTED: leucine-rich repeat receptor-like protein kinase PXL1 [Daucus carota subsp. sativus]	0.45	0.53	0.71	2.09	2.8	2.31	0.56	2.4
GO:0007165	signal transduction	biological_process	6	0	TRINITY_DN40300_c0_g5	-3.45527	down	RPP4	NBS/LRR, partial [Pinus taeda]	0.43	0.58	0.3	9.36	8.37	7.26	0.44	8.33
GO:0007165	signal transduction	biological_process	6	0	TRINITY_DN40401_c1_g1	2.21708	up	TAO1	hypothetical protein POPTR_0005s03260g [Populus trichocarpa]	0.75	0.95	1.99	0.64	0.37	0.33	1.23	0.45
GO:0007165	signal transduction	biological_process	6	0	TRINITY_DN40408_c1_g1	-1.28549	down	TAO1	unknown [Picea sitchensis]	1.57	4.6	4.2	27.27	22.89	25.14	3.46	25.1
GO:0007165	signal transduction	biological_process	6	0	TRINITY_DN40702_c0_g2	-1.17632	down	FZR3	unknown [Picea sitchensis]	0.92	1.4	2.86	6.1	7.65	5.48	1.73	6.41
GO:0007165	signal transduction	biological_process	6	0	TRINITY_DN40835_c0_g1	-1.40593	down	CDC20-2	hypothetical protein SELMODRAFT_86492 [Selaginella moellendorffii]	1.22	0.94	1.17	6.36	6.22	6.77	1.11	6.45
GO:0007165	signal transduction	biological_process	6	0	TRINITY_DN40902_c0_g2	-3.17779	down	PXC2	unknown [Picea sitchensis]	0.83	0.41	1.63	8.43	13.61	13.89	0.96	11.98
GO:0007165	signal transduction	biological_process	6	0	TRINITY_DN40995_c0_g1	-4.91723	down	HERC2	hypothetical protein B456_005G080500 [Gossypium raimondii]	0.03	0.04	0.11	2.99	3.36	2.8	0.06	3.05
GO:0007165	signal transduction	biological_process	6	0	TRINITY_DN41013_c2_g1	-1.39017	down	RPP1	unknown [Picea sitchensis]	3.67	4.63	9.61	24.79	26.7	25.11	5.97	25.53
GO:0007165	signal transduction	biological_process	6	0	TRINITY_DN41194_c2_g1	-1.75621	down	FLS2	hypothetical protein POPTR_0001s27000g [Populus trichocarpa]	0.09	1.09	4.48	9.81	9.19	12.04	1.89	10.35
GO:0007165	signal transduction	biological_process	6	0	TRINITY_DN41235_c0_g1	-2.52211	down	-	putative TIR/NBS/LRR disease resistance protein, partial [Pinus taeda]	1.61	5.21	5.3	30.89	31.48	36.91	4.04	33.09
GO:0007165	signal transduction	biological_process	6	0	TRINITY_DN41274_c0_g1	-7.64998	down	-	PREDICTED: TMV resistance protein N-like [Nelumbo nucifera]	0	0	0.02	2.93	1.92	2.27	0.01	2.37
GO:0007165	signal transduction	biological_process	6	0	TRINITY_DN41274_c0_g5	-8.29819	down	TAO1	PREDICTED: TMV resistance protein N-like [Nelumbo nucifera]	0	0	0	1.3	1.49	1.15	0	1.31
GO:0007165	signal transduction	biological_process	6	0	TRINITY_DN41277_c0_g1	-3.21689	down	WRKY19	predicted protein [Physcomitrella patens]	1.08	3.14	0.13	22.62	18.41	23.41	1.45	21.48
GO:0007165	signal transduction	biological_process	6	0	TRINITY_DN41403_c0_g2	-2.64739	down	GSO1	PREDICTED: receptor-like protein 12 [Jatropha curcas]	0.07	0.16	1.52	3.91	7.98	9.09	0.58	6.99
GO:0007165	signal transduction	biological_process	6	0	TRINITY_DN41437_c3_g1	5.35033	up	-	hypothetical protein POPTR_0005s030202g, partial [Populus trichocarpa]	1.88	3.4	7.58	0.46	0.03	0.02	4.29	0.17
GO:0007165	signal transduction	biological_process	6	0	TRINITY_DN41639_c0_g2	-1.27817	down	ORP1C	PREDICTED: oxysterol-binding protein-related protein 1D [Amborella trichopoda]	2.22	5.07	5.19	16.5	18.03	15.89	4.16	16.81
GO:0007165	signal transduction	biological_process	6	0	TRINITY_DN41647_c1_g1	-5.16819	down	GSO1	hypothetical protein, partial [Cryptomeria japonica]	0.27	0.46	0.25	19.79	17.99	14.08	0.33	17.29
GO:0007165	signal transduction	biological_process	6	0	TRINITY_DN41696_c0_g2	-1.0302	down	-	putative rp3 protein [Zea mays]	1.03	1.77	0.94	3.75	4.95	4.42	1.25	4.37
GO:0007165	signal transduction	biological_process	6	0	TRINITY_DN41724_c0_g4	-9.82805	down	At5g04720	unknown [Picea sitchensis]	0	0	0	1.46	1.42	1.4	0	1.43
GO:0007165	signal transduction	biological_process	6	0	TRINITY_DN41747_c0_g2	5.04871	up	TAO1	PREDICTED: disease resistance protein TAO1-like [Ipomoea nil]	1	3.1	1.43	0.19	0.02	0.06	1.84	0.09
GO:0007165	signal transduction	biological_process	6	0	TRINITY_DN41767_c0_g1	-1.26481	down	RPP1	predicted protein [Physcomitrella patens]	4.81	13.56	7.58	20.17	31.26	29.97	8.65	27.13
GO:0007165	signal transduction	biological_process	6	0	TRINITY_DN41767_c0_g2	2.17026	up	TAO1	hypothetical protein EUGRSUZ_B01867 [Eucalyptus grandis]	2.5	7.19	7.5	4.12	3.91	1.62	5.73	3.22
GO:0007165	signal transduction	biological_process	6	0	TRINITY_DN41950_c1_g2	-5.28895	down	TAO1	unknown [Picea sitchensis]	0.1	0.91	0.17	23.42	21.27	29.93	0.39	24.87
GO:0007165	signal transduction	biological_process	6	0	TRINITY_DN41950_c1_g3	-5.31987	down	-	PREDICTED: uncharacterized protein LOC104445431 [Eucalyptus grandis]	0.02	0.64	0.08	17.42	15.93	22.43	0.25	18.59
GO:0007165	signal transduction	biological_process	6	0	TRINITY_DN41953_c0_g3	-8.55472	down	TAO1	predicted protein [Physcomitrella patens]	0	0.03	0	8.06	4.88	6.7	0.01	6.55
GO:0007165	signal transduction	biological_process	6	0	TRINITY_DN42028_c0_g1	-1.02162	down	TAO1	predicted protein [Physcomitrella patens]	2.03	4.4	2.48	8.46	7.48	8.03	2.97	7.99
GO:0007165	signal transduction	biological_process	6	0	TRINITY_DN42148_c0_g2	-2.48961	down	CSA1	hypothetical protein EUGRSUZ_B01950 [Eucalyptus grandis]	0.36	0.5	0	2.34	2.53	2.24	0.29	2.37
GO:0007165	signal transduction	biological_process	6	0	TRINITY_DN42148_c0_g3	-1.13733	down	RGA1	predicted protein [Physcomitrella patens]	2.73	12.01	7.7	26.36	18.66	21.8	7.48	22.27
GO:0007165	signal transduction	biological_process	6	0	TRINITY_DN42151_c0_g1	-7.42818	down	FLS2	hypothetical protein, partial [Cryptomeria japonica]	0.06	0.07	0.01	14.88	11.1	16	0.05	13.99
GO:0007165	signal transduction	biological_process	6	0	TRINITY_DN42271_c0_g2	-11.8797	down	ANKRD28	PREDICTED: ankyrin repeat-containing protein At5g02620 [Amborella trichopoda]	0	0	0.01	49.9	25.61	30.93	0	35.48
GO:0007165	signal transduction	biological_process	6	0	TRINITY_DN42343_c0_g1	-1.80077	down	-	putative TIR/NBS/LRR disease resistance protein, partial [Pinus taeda]	1.41	3	2.63	13.33	14.17	14.79	2.35	14.1
GO:0007165	signal transduction	biological_process	6	0	TRINITY_DN42351_c1_g3	2.05917	up	-	PREDICTED: TMV resistance protein N-like isoform X1 [Solanum tuberosum]	6.06	5.04	3.11	2.63	1.63	1.59	4.74	1.95
GO:0007165	signal transduction	biological_process	6	0	TRINITY_DN42351_c1_g6	3.57345	up	RLM1A	hypothetical protein EUTSA_v10023218mg [Eutrema salsugineum]	1.77	2.54	1.39	0.24	0.3	0.28	1.9	0.27
GO:0007165	signal transduction	biological_process	6	0	TRINITY_DN42389_c0_g1	-2.03448	down	ROPGAP1	PREDICTED: rho GTPase-activating protein 5-like [Nelumbo nucifera]	2.48	3.45	3.88	19.68	24.96	24.11	3.27	22.92
GO:0007165	signal transduction	biological_process	6	0	TRINITY_DN42617_c0_g1	-6.50915	down	ANK1	Ankyrin repeat-containing protein At2g01680 family [Cajanus cajan]	0.02	0.05	0.01	2.91	3.17	3.44	0.03	3.17
GO:0007165	signal transduction	biological_process	6	0	TRINITY_DN42724_c0_g1	1.91335	up	RLP12	PREDICTED: LRR receptor-like serine/threonine-protein kinase RCH1 [Phoenix dactylifera]	2.63	4.31	7.19	2.93	1.73	2.48	4.71	2.38
GO:0007165	signal transduction	biological_process	6	0	TRINITY_DN42732_c1_g3	-6.64494	down	-	PREDICTED: LOW QUALITY PROTEIN: LRR receptor-like serine/threonine-protein kinase GSO2 [Amborella trichopoda]	0.14	0	0	14.36	11.88	7.61	0.05	11.28
GO:0007165	signal transduction	biological_process	6	0	TRINITY_DN42747_c0_g2	-2.38649	down	CSA1	Protein popC [Aegilops tauschii]	0.48	1.2	0.02	13.42	13.95	15.1	0.57	14.16
GO:0007165	signal transduction	biological_process	6	0	TRINITY_DN42815_c0_g1	-6.74756	down	-	putative TIR-NBS-LRR protein [Pinus monticola]	0.01	1.78	0.99	25.32	23.11	22.79	0.93	23.74
GO:0007165	signal transduction	biological_process	6	0	TRINITY_DN42850_c0_g4	-3.55485	down	At5g02620	Ankyrin repeat-containing protein At2g01680 family [Cajanus cajan]	0.64	0.41	0.26	7.32	8.28	9.37	0.44	8.32
GO:0007165	signal transduction	biological_process	6	0	TRINITY_DN42904_c0_g4	-3.97479	down	-	unknown [Picea sitchensis]	0.12	0	0.02	1.11	1.04	2.14	0.05	1.43
GO:0007165	signal transduction	biological_process	6	0	TRINITY_DN42930_c0_g6	-1.17838	down	DDB_G0278509	hypothetical protein EUGRSUZ_K01432 [Eucalyptus grandis]	1.22	2.85	2.39	8.23	7.96	6.59	2.15	7.59
GO:0007165	signal transduction	biological_process	6	0	TRINITY_DN42975_c1_g1	-1.19221	down	TAO1	NBS-LRR disease resistance protein homologue [Hordeum vulgare]	2.27	3.45	4.97	13.75	13.59	12.91	3.56	13.42
GO:0007165	signal transduction	biological_process	6	0	TRINITY_DN43012_c0_g2	-1.03194	down	RPP1	PREDICTED: TMV resistance protein N [Amborella trichopoda]	0.89	1.9	1.1	4.05	3.88	4.82	1.3	4.25
GO:0007165	signal transduction	biological_process	6	0	TRINITY_DN43157_c0_g1	-1.05312	down	RPP1	hypothetical protein AALP_AA1G281200 [Arabis alpina]	2.61	4.59	4.01	13.35	12.24	13.88	3.74	13.16
GO:0007165	signal transduction	biological_process	6	0	TRINITY_DN43171_c0_g2	-1.42731	down	LAZ5	unknown [Picea sitchensis]	0.69	1.21	1.17	3.58	4.88	3.16	1.02	3.87
GO:0007165	signal transduction	biological_process	6	0	TRINITY_DN43231_c0_g2	3.30371	up	ERECTA	hypothetical protein SETIT_028102mg [Setaria italica]	2.67	3.72	0.86	0.28	0.32	0.41	2.42	0.34
GO:0007165	signal transduction	biological_process	6	0	TRINITY_DN43258_c2_g2	-1.71417	down	WDR44	PREDICTED: WD repeat-containing protein 44 isoform X2 [Eucalyptus grandis]	3.64	3.19	2.73	15.31	17.63	16.23	3.19	16.39
GO:0007165	signal transduction	biological_process	6	0	TRINITY_DN43475_c0_g2	-1.8254	down	ADR1	putative TIR-NBS-LRR protein [Pinus monticola]	0.06	0.18	0.77	1.62	2.31	1.37	0.34	1.77
GO:0007165	signal transduction	biological_process	6	0	TRINITY_DN43546_c0_g1	-9.56219	down	popC	predicted protein [Physcomitrella patens]	0	0.01	0.03	19.31	15.51	22.09	0.01	18.97
GO:0007165	signal transduction	biological_process	6	0	TRINITY_DN43547_c0_g1	-1.51556	down	RPP1	putative TIR/NBS/LRR disease resistance protein, partial [Pinus taeda]	4.62	6.67	5.47	23.27	24.1	15.05	5.59	20.81
GO:0007165	signal transduction	biological_process	6	0	TRINITY_DN43688_c0_g1	-4.94978	down	TAO1	hypothetical protein SORBIDRAFT_08g022995, partial [Sorghum bicolor]	0.07	1.09	0.38	22.38	24.68	28.46	0.51	25.17
GO:0007165	signal transduction	biological_process	6	0	TRINITY_DN43688_c0_g6	-4.52943	down	popC	PREDICTED: leucine-rich repeat protein soc-2 homolog [Eucalyptus grandis]	0.15	0.89	0.28	14.68	15.32	19.47	0.44	16.49
GO:0007165	signal transduction	biological_process	6	0	TRINITY_DN43844_c0_g5	5.98318	up	At2g28990	LRK1 [Pinus tabuliformis]	2.54	3.79	2.17	0.2	0	0	2.83	0.07
GO:0007165	signal transduction	biological_process	6	0	TRINITY_DN44023_c4_g1	-1.61297	down	RGA2	PREDICTED: putative disease resistance protein RGA3 [Gossypium hirsutum]	0.35	0.26	0.36	1.27	1.45	2.17	0.32	1.63
GO:0007165	signal transduction	biological_process	6	0	TRINITY_DN44219_c0_g1	-2.01603	down	TAO1	unknown [Picea sitchensis]	4.85	8.29	7.85	53	44.32	42.39	7	46.57
GO:0007165	signal transduction	biological_process	6	0	TRINITY_DN44313_c0_g2	-1.2932	down	-	unknown [Picea sitchensis]	0.59	2.25	2.48	6.86	7.91	7.65	1.77	7.47
GO:0007165	signal transduction	biological_process	6	0	TRINITY_DN44332_c0_g1	-2.91494	down	-	unknown [Picea sitchensis]	1.32	3.34	4.41	33.12	28.83	25.56	3.02	29.17
GO:0007165	signal transduction	biological_process	6	0	TRINITY_DN44332_c0_g5	-1.71786	down	VICTR	putative TIR/NBS/LRR disease resistance protein, partial [Pinus taeda]	0.08	0.21	0.31	1.26	0.92	1.18	0.2	1.12
GO:0007165	signal transduction	biological_process	6	0	TRINITY_DN44489_c0_g2	-6.98081	down	TAO1	unknown [Picea sitchensis]	0.02	0.03	0.11	14.56	10.87	16.11	0.05	13.85
GO:0007165	signal transduction	biological_process	6	0	TRINITY_DN44604_c0_g1	-1.93131	down	RPP1	hypothetical protein EUGRSUZ_B01950 [Eucalyptus grandis]	2.7	5.86	1.74	29.05	26.31	23.27	3.43	26.21
GO:0007165	signal transduction	biological_process	6	0	TRINITY_DN44721_c0_g1	-2.93386	down	CLV2	hypothetical protein AMTR_s00049p00037310 [Amborella trichopoda]	0.72	1.03	1.01	10.81	10.82	11.07	0.92	10.9
GO:0007165	signal transduction	biological_process	6	0	TRINITY_DN44761_c1_g4	1.43746	up	At4g36180	serine-threonine protein kinase, plant-type, putative [Ricinus communis]	0.77	1.26	0.37	0.88	0.4	0.22	0.8	0.5
GO:0007165	signal transduction	biological_process	6	0	TRINITY_DN45186_c0_g1	-1.83794	down	At4g11170	putative truncated TIR-NBS-LRR protein [Pinus monticola]	1.45	1.14	1.76	8.9	8.28	9.65	1.45	8.94
GO:0007165	signal transduction	biological_process	6	0	TRINITY_DN45230_c0_g1	4.56216	up	CSA1	predicted protein [Physcomitrella patens]	15.69	12.42	8.31	0.8	0.56	0.47	12.14	0.61
GO:0007165	signal transduction	biological_process	6	0	TRINITY_DN45283_c0_g4	-7.22307	down	GSO2	LRR receptor-like kinase family protein [Medicago truncatula]	0	0.1	0	11.82	7.81	4.57	0.03	8.07
GO:0007165	signal transduction	biological_process	6	0	TRINITY_DN45354_c0_g1	-5.2148	down	TAO1	unknown [Picea sitchensis]	0.13	0.07	0.03	2.66	2.96	3.43	0.08	3.02
GO:0007165	signal transduction	biological_process	6	0	TRINITY_DN45438_c0_g2	1.34397	up	-	PREDICTED: uncharacterized protein LOC18426598 [Amborella trichopoda]	16.8	12.88	6.7	8.58	6.43	7.38	12.13	7.46
GO:0007165	signal transduction	biological_process	6	0	TRINITY_DN45454_c0_g1	-2.02914	down	PIRL9	unknown [Picea sitchensis]	1.98	2.81	5.98	14.65	15.31	13.32	3.59	14.43
GO:0007165	signal transduction	biological_process	6	0	TRINITY_DN45454_c0_g5	-1.83632	down	CSA1	unknown [Picea sitchensis]	2.3	6.88	6.13	40.8	32.51	30.28	5.1	34.53
GO:0007165	signal transduction	biological_process	6	0	TRINITY_DN45472_c0_g2	-7.61324	down	GSO1	PREDICTED: LRR receptor-like serine/threonine-protein kinase GSO2 [Musa acuminata subsp. malaccensis]	0.01	0.02	0.02	6.46	3.59	3.53	0.02	4.53
GO:0007165	signal transduction	biological_process	6	0	TRINITY_DN45474_c3_g3	-1.29828	down	NPR4	unknown [Picea sitchensis]	3.63	6.73	5.69	22.56	24.29	19.69	5.35	22.18
GO:0007165	signal transduction	biological_process	6	0	TRINITY_DN45528_c0_g1	-4.33901	down	RLM1A	unknown [Picea sitchensis]	0.09	0.43	0.08	4.68	4.97	4.33	0.2	4.66
GO:0007165	signal transduction	biological_process	6	0	TRINITY_DN45556_c0_g1	1.64342	up	RLP30	hypothetical protein VITISV_017886 [Vitis vinifera]	3.13	5.7	4.8	2.68	2.42	2.66	4.54	2.59
GO:0007165	signal transduction	biological_process	6	0	TRINITY_DN45599_c0_g1	-2.33035	down	WRKY16	putative TIR-NBS-LRR protein [Pinus monticola]	0.74	1.04	2.49	5.3	4.71	3.58	1.42	4.53
GO:0007165	signal transduction	biological_process	6	0	TRINITY_DN45611_c1_g1	-8.60243	down	RPP1	unknown [Picea sitchensis]	0.01	0	0.01	3.1	3.42	3.11	0.01	3.21
GO:0007165	signal transduction	biological_process	6	0	TRINITY_DN45611_c1_g2	-9.87157	down	TAO1	unknown [Picea sitchensis]	0	0	0	3.5	3.44	2.29	0	3.08
GO:0007165	signal transduction	biological_process	6	0	TRINITY_DN45666_c1_g1	-1.12229	down	VICTR	unknown [Picea sitchensis]	5.35	9.39	8.69	27.71	28.78	24.24	7.81	26.91
GO:0007165	signal transduction	biological_process	6	0	TRINITY_DN45671_c1_g1	-6.15922	down	CIPK16	PREDICTED: CBL-interacting protein kinase 5-like [Nelumbo nucifera]	0	0	0.1	6.75	7.67	3.64	0.03	6.02
GO:0007165	signal transduction	biological_process	6	0	TRINITY_DN45671_c2_g1	-1.23795	down	CIPK20	unknown [Picea sitchensis]	7.77	11.47	10.31	34.56	48	37.62	9.85	40.06
GO:0007165	signal transduction	biological_process	6	0	TRINITY_DN45671_c2_g2	-5.0424	down	CIPK20	PREDICTED: CBL-interacting serine/threonine-protein kinase 20 [Fragaria vesca subsp. vesca]	0.25	1.07	0.44	28.45	33.92	35.15	0.59	32.51
GO:0007165	signal transduction	biological_process	6	0	TRINITY_DN45671_c2_g3	-4.35456	down	CIPK5	unknown [Picea sitchensis]	0.37	0.68	0.65	16.91	20.37	20.45	0.57	19.24
GO:0007165	signal transduction	biological_process	6	0	TRINITY_DN45671_c2_g4	-1.48344	down	CIPK2	unknown [Picea sitchensis]	1.99	3.61	6.46	16.05	21.82	19.59	4.02	19.15
GO:0007165	signal transduction	biological_process	6	0	TRINITY_DN45727_c0_g1	-1.30272	down	TAO1	putative TIR-NBS-LRR protein [Pinus monticola]	1.55	3.85	2.66	15.04	11.21	11.11	2.69	12.45
GO:0007165	signal transduction	biological_process	6	0	TRINITY_DN45938_c0_g1	-2.95393	down	RRS1	putative truncated TIR-NBS-LRR protein [Pinus monticola]	0.69	1.71	2.55	36.18	23.73	34.3	1.65	31.4
GO:0007165	signal transduction	biological_process	6	0	TRINITY_DN45959_c0_g4	1.38535	up	VAB	hypothetical protein AMTR_s00002p00271020 [Amborella trichopoda]	2.02	2.27	5.64	3.08	2.61	3.47	3.31	3.05
GO:0007165	signal transduction	biological_process	6	0	TRINITY_DN45986_c2_g1	-2.11503	down	TAO1	PREDICTED: TMV resistance protein N-like [Eucalyptus grandis]	0.41	1.22	1.57	8.9	7.04	8.22	1.07	8.05
GO:0007165	signal transduction	biological_process	6	0	TRINITY_DN45986_c2_g2	-7.98331	down	RGA1	PREDICTED: disease resistance protein TAO1-like isoform X2 [Eucalyptus grandis]	0	0	0.01	1.65	1.16	1.15	0	1.32
GO:0007165	signal transduction	biological_process	6	0	TRINITY_DN46008_c2_g3	-1.18035	down	-	putative TIR-NBS-LRR protein [Pinus monticola]	5.33	6.98	7.21	21.86	31.97	26.45	6.51	26.76
GO:0007165	signal transduction	biological_process	6	0	TRINITY_DN46138_c0_g1	-1.64677	down	-	hypothetical protein JCGZ_11251 [Jatropha curcas]	3.91	5.45	4.56	24.81	24.97	24.36	4.64	24.71
GO:0007165	signal transduction	biological_process	6	0	TRINITY_DN46145_c1_g1	9.26527	up	TAO1	unknown [Picea sitchensis]	0.71	1.32	1.78	0	0	0	1.27	0
GO:0007165	signal transduction	biological_process	6	0	TRINITY_DN46196_c0_g1	-1.74015	down	CSA1	hypothetical protein DCAR_005190 [Daucus carota subsp. sativus]	3.32	7.28	7.1	30.04	31.27	24.8	5.9	28.7
GO:0007165	signal transduction	biological_process	6	0	TRINITY_DN46267_c2_g2	-3.54725	down	RRS1	NBS/LRR, partial [Pinus taeda]	0.9	2.08	0.13	22.33	20.12	21.13	1.04	21.19
GO:0007165	signal transduction	biological_process	6	0	TRINITY_DN46267_c2_g7	-2.01324	down	SNC1	NBS/LRR, partial [Pinus taeda]	0.55	0.82	1.36	7.68	5.57	7.26	0.91	6.84
GO:0007165	signal transduction	biological_process	6	0	TRINITY_DN46273_c2_g1	-1.9727	down	RPP1	predicted protein [Physcomitrella patens]	1.11	1.8	1.83	10.4	10.46	9.73	1.58	10.2
GO:0007165	signal transduction	biological_process	6	0	TRINITY_DN46342_c1_g4	-1.24576	down	TAO1	unknown [Picea sitchensis]	1.83	3.61	2.76	11.75	10.82	8.41	2.73	10.33
GO:0007165	signal transduction	biological_process	6	0	TRINITY_DN46391_c0_g1	-1.13761	down	FAB1B	PREDICTED: 1-phosphatidylinositol-3-phosphate 5-kinase FAB1B [Amborella trichopoda]	2.37	6.22	5.21	16.7	19.48	16.32	4.6	17.5
GO:0007165	signal transduction	biological_process	6	0	TRINITY_DN46481_c0_g1	2.18611	up	TAO1	predicted protein [Physcomitrella patens]	16.53	29.72	24.58	8.66	7.71	5.78	23.61	7.38
GO:0007165	signal transduction	biological_process	6	0	TRINITY_DN46482_c1_g2	1.99224	up	-	TIR/NBS, partial [Pinus taeda]	1.59	2.85	2.16	0.93	0.84	1.02	2.2	0.93
GO:0007165	signal transduction	biological_process	6	0	TRINITY_DN46482_c1_g4	-4.99807	down	VICTR	putative TIR/NBS/LRR disease resistance protein, partial [Pinus taeda]	0	0.72	1.23	7.87	4.77	6.04	0.65	6.23
GO:0007165	signal transduction	biological_process	6	0	TRINITY_DN46482_c1_g7	-1.68159	down	-	putative truncated TIR-NBS-LRR protein [Pinus monticola]	1.21	2.45	2.13	11.62	11.55	8.57	1.93	10.58
GO:0007165	signal transduction	biological_process	6	0	TRINITY_DN46515_c0_g1	-1.67177	down	PIRL5	unknown [Picea sitchensis]	0.65	1.32	1.63	8.53	7.94	4.96	1.2	7.14
GO:0007165	signal transduction	biological_process	6	0	TRINITY_DN46515_c0_g2	-1.94644	down	-	NBS/LRR, partial [Pinus taeda]	5.85	11.39	9.47	40.61	44.69	35.29	8.9	40.2
GO:0007165	signal transduction	biological_process	6	0	TRINITY_DN46603_c2_g1	-2.65033	down	RPP1	putative truncated TIR-NBS-LRR protein [Pinus monticola]	0.63	1.24	0.55	11.55	9.15	7.55	0.81	9.42
GO:0007165	signal transduction	biological_process	6	0	TRINITY_DN46604_c1_g1	2.75166	up	CSA1	hypothetical protein EUGRSUZ_B01867 [Eucalyptus grandis]	11.14	18.69	15.06	5.98	4.4	3.16	14.96	4.51
GO:0007165	signal transduction	biological_process	6	0	TRINITY_DN46634_c0_g1	-4.46869	down	PLC2	unknown [Picea sitchensis]	0.59	0.82	0.48	15.98	25.73	26.54	0.63	22.75
GO:0007165	signal transduction	biological_process	6	0	TRINITY_DN46637_c0_g1	-1.89222	down	RPP1	predicted protein [Physcomitrella patens]	4.85	9.73	14.83	64.54	65.07	54.41	9.8	61.34
GO:0007165	signal transduction	biological_process	6	0	TRINITY_DN46693_c2_g1	5.54782	up	-	hypothetical protein VITISV_020777 [Vitis vinifera]	1.94	3.09	1.48	0.05	0	0.17	2.17	0.07
GO:0007165	signal transduction	biological_process	6	0	TRINITY_DN46768_c0_g4	4.7172	up	TAO1	hypothetical protein AXG93_2912s1330 [Marchantia polymorpha subsp. polymorpha]	24.31	19.2	12.39	2.16	1.5	0.99	18.63	1.55
GO:0007165	signal transduction	biological_process	6	0	TRINITY_DN46777_c0_g1	-5.22679	down	ITN1	hypothetical protein POPTR_0011s13660g [Populus trichocarpa]	0.35	0.83	0.69	26.01	31.93	35.83	0.62	31.26
GO:0007165	signal transduction	biological_process	6	0	TRINITY_DN46908_c1_g1	6.37148	up	-	hypothetical protein, partial [Cryptomeria japonica]	2.38	3.74	1.07	0	0	0.13	2.4	0.04
GO:0007165	signal transduction	biological_process	6	0	TRINITY_DN46908_c2_g2	5.87977	up	RLP12	hypothetical protein MANES_10G092900 [Manihot esculenta]	1.45	2.65	0.81	0.06	0	0.06	1.64	0.04
GO:0007165	signal transduction	biological_process	6	0	TRINITY_DN46910_c2_g3	-1.86685	down	scrib	PREDICTED: leucine-rich repeat protein soc-2 homolog [Eucalyptus grandis]	1.49	2.36	3.31	12.09	11.63	10.34	2.39	11.35
GO:0007165	signal transduction	biological_process	6	0	TRINITY_DN46918_c1_g1	-1.46719	down	CSA1	putative TIR-NBS-LRR protein [Pinus monticola]	1.6	2.52	1.76	8.3	7.94	7.54	1.96	7.93
GO:0007165	signal transduction	biological_process	6	0	TRINITY_DN46918_c1_g2	1.41249	up	RPS6	unknown [Picea sitchensis]	3.68	3.42	1.74	1.85	2.08	1.96	2.95	1.96
GO:0007165	signal transduction	biological_process	6	0	TRINITY_DN46923_c1_g1	-3.36563	down	v1g189306	PREDICTED: TMV resistance protein N [Eucalyptus grandis]	0.14	0.66	0.84	10.73	10.66	9.36	0.55	10.25
GO:0007165	signal transduction	biological_process	6	0	TRINITY_DN46935_c1_g1	-4.14314	down	ITN1	hypothetical protein SETIT_027525mg [Setaria italica]	0.2	0.45	1.94	21.98	24.89	24.75	0.86	23.87
GO:0007165	signal transduction	biological_process	6	0	TRINITY_DN46975_c0_g1	1.94594	up	scrib	predicted protein [Physcomitrella patens]	37.52	22.15	20.97	11.45	8.25	13.15	26.88	10.95
GO:0007165	signal transduction	biological_process	6	0	TRINITY_DN47020_c0_g2	-7.77358	down	At5g66910	PREDICTED: TMV resistance protein N-like [Daucus carota subsp. sativus]	0.02	0.11	0.01	13.23	10.54	11.18	0.05	11.65
GO:0007165	signal transduction	biological_process	6	0	TRINITY_DN47039_c1_g1	-8.66506	down	TAO1	hypothetical protein AMTR_s00056p00215980 [Amborella trichopoda]	0	0	0	4.33	2.73	3.44	0	3.5
GO:0007165	signal transduction	biological_process	6	0	TRINITY_DN47072_c0_g2	2.66097	up	XA21	PREDICTED: leucine-rich repeat receptor protein kinase EMS1-like [Glycine max]	2	11.42	13.39	3.58	2.09	1.59	8.94	2.42
GO:0007165	signal transduction	biological_process	6	0	TRINITY_DN47072_c0_g3	2.46779	up	RLP12	hypothetical protein MANES_10G137200 [Manihot esculenta]	3.13	12.38	16.08	4.65	2.94	1.75	10.53	3.11
GO:0007165	signal transduction	biological_process	6	0	TRINITY_DN47072_c0_g8	-5.89505	down	At1g34110	PREDICTED: LRR receptor-like serine/threonine-protein kinase FLS2 [Gossypium raimondii]	0	0	0.03	1.7	1.89	0.59	0.01	1.39
GO:0007165	signal transduction	biological_process	6	0	TRINITY_DN47076_c1_g1	-1.30237	down	PSKR1	unknown [Picea sitchensis]	0.62	2.28	0.91	4.65	5.53	5.62	1.27	5.27
GO:0007165	signal transduction	biological_process	6	0	TRINITY_DN47085_c1_g1	-1.09648	down	Sur-8	unknown [Picea sitchensis]	2.32	6.39	5.06	24.98	17.04	14.87	4.59	18.96
GO:0007165	signal transduction	biological_process	6	0	TRINITY_DN47101_c1_g4	-1.98878	down	RPP1	predicted protein [Physcomitrella patens]	1.22	3.08	1.69	3.63	3.18	4.03	2	3.61
GO:0007165	signal transduction	biological_process	6	0	TRINITY_DN47123_c1_g1	4.88491	up	CSA1	PREDICTED: TMV resistance protein N [Vitis vinifera]	12.75	12.5	9.33	0.37	0.25	0.59	11.53	0.4
GO:0007165	signal transduction	biological_process	6	0	TRINITY_DN47194_c2_g1	-1.33185	down	TAO1	unknown [Picea sitchensis]	3.62	5.06	5.98	24.6	21.54	24.45	4.89	23.53
GO:0007165	signal transduction	biological_process	6	0	TRINITY_DN47194_c2_g3	-1.84536	down	RRS1	putative NBS-LRR protein G8029, partial [Pinus monticola]	1.18	2.84	2.89	14.86	16.31	12.85	2.3	14.67
GO:0007165	signal transduction	biological_process	6	0	TRINITY_DN47237_c2_g1	-4.22328	down	-	unknown [Picea sitchensis]	1.2	0.83	0.15	11.11	10.07	10.69	0.73	10.62
GO:0007165	signal transduction	biological_process	6	0	TRINITY_DN47237_c3_g1	-3.68633	down	-	unknown [Picea sitchensis]	0.75	1.37	0.13	14.55	15.11	15.8	0.75	15.15
GO:0007165	signal transduction	biological_process	6	0	TRINITY_DN47245_c1_g1	-3.18783	down	TAO1	putative truncated TIR-NBS-LRR protein [Pinus monticola]	0.95	3.55	3.45	46.22	40.47	31.64	2.65	39.44
GO:0007165	signal transduction	biological_process	6	0	TRINITY_DN47272_c4_g1	1.75788	up	At4g11170	leucine-rich repeat-containing protein, putative [Ricinus communis]	11.88	10.16	8.49	5.49	2.32	3.68	10.18	3.83
GO:0007165	signal transduction	biological_process	6	0	TRINITY_DN47272_c4_g3	5.32005	up	RLM1A	PREDICTED: TMV resistance protein N-like isoform X1 [Solanum tuberosum]	2.62	2.81	1.68	0.15	0.17	0	2.37	0.11
GO:0007165	signal transduction	biological_process	6	0	TRINITY_DN47284_c0_g1	-1.28222	down	RLP30	PREDICTED: LRR receptor-like serine/threonine-protein kinase GSO1 isoform X1 [Cicer arietinum]	1.64	4.93	3.54	11.79	10.9	13.51	3.37	12.07
GO:0007165	signal transduction	biological_process	6	0	TRINITY_DN47284_c1_g1	-1.9866	down	RLP12	PREDICTED: LOW QUALITY PROTEIN: LRR receptor-like serine/threonine-protein kinase FLS2 [Citrus sinensis]	2.62	8.9	7.39	25.17	30.75	28.43	6.3	28.12
GO:0007165	signal transduction	biological_process	6	0	TRINITY_DN47289_c1_g1	-1.07833	down	-	putative NBS-LRR protein G8029, partial [Pinus monticola]	1.18	1.71	1.94	5	6.51	5.54	1.61	5.68
GO:0007165	signal transduction	biological_process	6	0	TRINITY_DN47289_c2_g2	-1.13563	down	At5g47280	putative truncated TIR-NBS-LRR protein [Pinus monticola]	2.48	6.16	3.96	15.85	15.95	14.32	4.2	15.37
GO:0007165	signal transduction	biological_process	6	0	TRINITY_DN47301_c1_g1	2.01574	up	TAO1	predicted protein [Physcomitrella patens]	5.33	9.26	9.05	3.11	3.99	5.24	7.88	4.11
GO:0007165	signal transduction	biological_process	6	0	TRINITY_DN47303_c0_g1	-3.19507	down	-	PREDICTED: receptor-like protein 12 [Ipomoea nil]	0.58	0.63	0.96	7.92	11.42	6.79	0.72	8.71
GO:0007165	signal transduction	biological_process	6	0	TRINITY_DN47307_c2_g1	-1.41857	down	RPP1	unknown [Picea sitchensis]	2.09	6.14	6.17	26.13	24.44	31.82	4.8	27.46
GO:0007165	signal transduction	biological_process	6	0	TRINITY_DN47318_c0_g1	-2.11524	down	CSA1	PREDICTED: disease resistance protein TAO1-like isoform X2 [Eucalyptus grandis]	0.13	0.19	0.33	1.14	1.64	4.9	0.22	2.56
GO:0007165	signal transduction	biological_process	6	0	TRINITY_DN47318_c3_g2	1.25831	up	IRL3	PREDICTED: TMV resistance protein N [Amborella trichopoda]	3.52	6	7.48	5.16	4.62	3.88	5.67	4.55
GO:0007165	signal transduction	biological_process	6	0	TRINITY_DN47325_c4_g1	-1.33595	down	RPS4	putative truncated TIR-NBS-LRR protein [Pinus monticola]	7.06	12.99	9.29	42.15	50.68	43.53	9.78	45.45
GO:0006952	defense response	biological_process	5	0	TRINITY_DN33259_c0_g2	-6.83584	down	MLO1	PREDICTED: MLO-like protein 1 isoform X1 [Nelumbo nucifera]	0	0.09	0	4.76	6.76	6.62	0.03	6.05
GO:0006952	defense response	biological_process	5	0	TRINITY_DN33283_c0_g4	2.12282	up	TIR	predicted protein [Physcomitrella patens]	0.96	1.76	1.88	0.65	0.71	0.41	1.53	0.59
GO:0006952	defense response	biological_process	5	0	TRINITY_DN33487_c0_g1	-2.36979	down	ADR1	putative disease resistance protein [Ananas comosus]	0.94	1.54	1.3	10.99	12.2	10.64	1.26	11.28
GO:0006952	defense response	biological_process	5	0	TRINITY_DN33625_c0_g1	-4.35608	down	PLP6	PLP2 [Pinus tabuliformis]	0.49	0.06	0.02	6.05	8.71	8.71	0.19	7.82
GO:0006952	defense response	biological_process	5	0	TRINITY_DN33866_c0_g1	-1.25277	down	CRY1	putative CRY1 [Cryptomeria japonica]	8.02	11.97	8.62	33.23	35.9	41.02	9.54	36.72
GO:0006952	defense response	biological_process	5	0	TRINITY_DN33892_c2_g3	5.38345	up	-	PR-4 protein [Pseudotsuga menziesii]	399.06	333.04	330.62	39.18	3.6	1.82	354.24	14.87
GO:0006952	defense response	biological_process	5	0	TRINITY_DN33902_c1_g3	-3.11704	down	-	unknown [Picea sitchensis]	0.14	0.12	0.11	2.37	1.43	1.09	0.12	1.63
GO:0006952	defense response	biological_process	5	0	TRINITY_DN33933_c0_g1	1.75297	up	GSO1	PREDICTED: receptor-like protein 12 [Ziziphus jujuba]	0.4	1.18	0.65	0.67	0.28	0.14	0.74	0.36
GO:0006952	defense response	biological_process	5	0	TRINITY_DN34180_c0_g2	-1.70069	down	BAP2	BAP1 [Vitis vinifera]	0.86	1.47	1.72	5.81	9.47	5.28	1.35	6.85
GO:0006952	defense response	biological_process	5	0	TRINITY_DN34213_c0_g1	7.85306	up	-	unknown [Picea sitchensis]	11.22	23.04	12.57	0	0.15	0.18	15.61	0.11
GO:0006952	defense response	biological_process	5	0	TRINITY_DN34281_c0_g1	1.28176	up	LAZ5	NBS/LRR, partial [Pinus taeda]	2.72	2.61	1.11	1.63	1.47	1.59	2.15	1.56
GO:0006952	defense response	biological_process	5	0	TRINITY_DN34301_c0_g1	1.14914	up	ATL24	unknown [Picea sitchensis]	47.81	13.52	9.26	18.75	19.98	20.5	23.53	19.74
GO:0006952	defense response	biological_process	5	0	TRINITY_DN34390_c0_g1	-4.59576	down	PLP6	PLP2 [Pinus tabuliformis]	0.31	0.67	0.24	17.41	18.45	14.18	0.41	16.68
GO:0006952	defense response	biological_process	5	0	TRINITY_DN34560_c0_g1	-2.33275	down	At5g66910	hypothetical protein ZOSMA_87G00870 [Zostera marina]	0	0.04	0.25	0.89	0.74	0.81	0.1	0.81
GO:0006952	defense response	biological_process	5	0	TRINITY_DN34560_c0_g3	-4.36911	down	TAO1	predicted protein [Physcomitrella patens]	0.04	0.22	0.42	8.51	7.06	7.94	0.23	7.84
GO:0006952	defense response	biological_process	5	0	TRINITY_DN34560_c0_g4	-8.46596	down	TAO1	hypothetical protein POPTR_0004s08710g [Populus trichocarpa]	0	0	0.02	14.87	11.22	15.23	0.01	13.77
GO:0006952	defense response	biological_process	5	0	TRINITY_DN34593_c0_g1	-4.00244	down	RGA2	unknown [Picea sitchensis]	0.1	0.81	0.09	8.93	9.15	9.66	0.33	9.25
GO:0006952	defense response	biological_process	5	0	TRINITY_DN34613_c0_g1	-2.50755	down	ATL2	PREDICTED: RING-H2 finger protein ATL2-like [Nicotiana attenuata]	0.15	0.72	1.37	9.01	7.15	3.91	0.75	6.69
GO:0006952	defense response	biological_process	5	0	TRINITY_DN34613_c0_g2	-2.19718	down	ATL2	unknown [Picea sitchensis]	0.2	0.32	0.55	3.16	2.64	2.29	0.36	2.7
GO:0006952	defense response	biological_process	5	0	TRINITY_DN34731_c0_g2	-1.51809	down	RLP12	PREDICTED: receptor-like protein 12 [Theobroma cacao]	1.29	2.21	2.52	8.28	8.02	6.92	2.01	7.74
GO:0006952	defense response	biological_process	5	0	TRINITY_DN34738_c5_g1	2.27972	up	TAO1	disease resistance protein (TIR-NBS-LRR class) [Arabidopsis thaliana]	0.58	0.69	1.22	0.38	0.15	0.34	0.83	0.29
GO:0006952	defense response	biological_process	5	0	TRINITY_DN34753_c0_g1	-2.46668	down	MLO4	PREDICTED: MLO-like protein 4 [Amborella trichopoda]	0.35	0.42	0.27	2.54	3.71	3.71	0.35	3.32
GO:0006952	defense response	biological_process	5	0	TRINITY_DN35220_c0_g1	-12.8233	down	MLO12	PREDICTED: LOW QUALITY PROTEIN: MLO protein homolog 1 [Amborella trichopoda]	0	0	0	13.34	10.65	12.45	0	12.15
GO:0006952	defense response	biological_process	5	0	TRINITY_DN35905_c0_g1	-3.90791	down	RPS5	NBS-LRR type disease resistance protein [Medicago truncatula]	0.14	1.84	3.49	46.97	38.02	53.41	1.82	46.13
GO:0006952	defense response	biological_process	5	0	TRINITY_DN35974_c0_g1	-4.1793	down	CYP74A	unknown [Picea sitchensis]	1.43	3.83	4.25	67.59	98.66	119.79	3.17	95.35
GO:0006952	defense response	biological_process	5	0	TRINITY_DN36069_c0_g1	-8.76922	down	-	PREDICTED: TMV resistance protein N-like [Arachis ipaensis]	0	0	0	9.16	5.72	5.15	0	6.68
GO:0006952	defense response	biological_process	5	0	TRINITY_DN36192_c0_g1	-2.14961	down	ATL78	unknown [Picea sitchensis]	0.93	0.3	0.12	2.88	5.77	5.29	0.45	4.65
GO:0006952	defense response	biological_process	5	0	TRINITY_DN36203_c0_g2	-6.89956	down	TAO1	unknown [Picea sitchensis]	0.01	0.04	0.02	5.04	4.22	4.83	0.02	4.7
GO:0006952	defense response	biological_process	5	0	TRINITY_DN36263_c0_g1	-3.77086	down	WRKY16	NBS/LRR, partial [Pinus taeda]	0	0.52	0.03	5.37	7.26	6.04	0.18	6.22
GO:0006952	defense response	biological_process	5	0	TRINITY_DN36399_c0_g2	-2.02219	down	-	NB-ARC [Pinus tabuliformis]	1.04	2.84	1.63	13.27	7.12	14.85	1.84	11.75
GO:0006952	defense response	biological_process	5	0	TRINITY_DN36482_c1_g4	-3.13009	down	At4g33300	CC-NBS-LRR resistance-like protein [Pinus lambertiana]	2.46	6.24	8.73	85.82	82.46	84.44	5.81	84.24
GO:0006952	defense response	biological_process	5	0	TRINITY_DN36621_c1_g2	-1.12617	down	ATL2	unknown [Picea sitchensis]	0.41	0.88	0.73	2.19	2.86	2.49	0.67	2.51
GO:0006952	defense response	biological_process	5	0	TRINITY_DN36624_c0_g2	-2.15936	down	CESA8	cellulose synthase, partial [Pinus radiata]	30.55	53.37	89.27	275.3	322.88	308.84	57.73	302.34
GO:0006952	defense response	biological_process	5	0	TRINITY_DN36624_c0_g4	-1.82813	down	CESA2	cellulose synthase, partial [Pinus radiata]	0.81	0.71	0.55	5.01	3.39	4.87	0.69	4.42
GO:0006952	defense response	biological_process	5	0	TRINITY_DN36672_c3_g1	-2.97354	down	At5g66890	PREDICTED: putative disease resistance protein At3g14460 [Gossypium hirsutum]	0.39	0.51	0.68	10.49	9.87	2.96	0.53	7.77
GO:0006952	defense response	biological_process	5	0	TRINITY_DN36858_c1_g2	4.19385	up	WRKY72	PREDICTED: probable WRKY transcription factor 61 isoform X1 [Gossypium hirsutum]	12.93	8.95	5.91	2.35	0.31	0.04	9.26	0.9
GO:0006952	defense response	biological_process	5	0	TRINITY_DN36858_c1_g3	3.47242	up	WRKY72	hypothetical protein TSUD_208810 [Trifolium subterraneum]	1.24	1.01	0.24	0.35	0.03	0	0.83	0.13
GO:0006952	defense response	biological_process	5	0	TRINITY_DN37356_c0_g1	-6.29029	down	At1g58400	PREDICTED: putative disease resistance protein RGA3 isoform X1 [Vigna angularis]	0	0.06	0	2.35	2.88	2.1	0.02	2.44
GO:0006952	defense response	biological_process	5	0	TRINITY_DN37356_c0_g2	-5.02202	down	RPS5	PREDICTED: LOW QUALITY PROTEIN: disease resistance RPP13-like protein 4 [Capsicum annuum]	0.15	0.08	1.31	7.76	4.74	8.16	0.51	6.89
GO:0006952	defense response	biological_process	5	0	TRINITY_DN37356_c0_g3	-8.3855	down	RPPL1	TPA: hypothetical protein ZEAMMB73_852544 [Zea mays]	0	0	0	7.38	4.23	7.17	0	6.26
GO:0006952	defense response	biological_process	5	0	TRINITY_DN37804_c0_g1	-1.81361	down	RCH1	PREDICTED: LRR receptor-like serine/threonine-protein kinase FLS2 [Phoenix dactylifera]	0.24	1.58	1.54	5.8	5.73	6.65	1.12	6.06
GO:0006952	defense response	biological_process	5	0	TRINITY_DN37830_c0_g1	-5.5339	down	BAM2	PREDICTED: LRR receptor-like serine/threonine-protein kinase RCH1 [Phoenix dactylifera]	0	0	0.09	3.57	3.12	2.41	0.03	3.03
GO:0006952	defense response	biological_process	5	0	TRINITY_DN37944_c0_g3	-4.35732	down	PER70	class III secretory peroxidase [Ginkgo biloba]	0	0.29	0.08	2.7	4.87	5.4	0.12	4.32
GO:0006952	defense response	biological_process	5	0	TRINITY_DN37948_c3_g3	-1.53856	down	LRRD1	unknown [Picea sitchensis]	1.98	3.29	1.77	11.41	9.49	12.89	2.35	11.26
GO:0006952	defense response	biological_process	5	0	TRINITY_DN37948_c3_g4	5.27872	up	RPP1	unknown [Picea sitchensis]	3.42	4.87	10.94	0.72	0.05	0.04	6.41	0.27
GO:0006952	defense response	biological_process	5	0	TRINITY_DN38009_c0_g1	-1.6387	down	RLP12	PREDICTED: LRR receptor-like serine/threonine-protein kinase FLS2 [Gossypium raimondii]	1.61	6.44	4.31	20.2	17.91	19.81	4.12	19.31
GO:0006952	defense response	biological_process	5	0	TRINITY_DN38009_c0_g3	-2.3882	down	PXC2	PREDICTED: receptor-like protein 12 [Amborella trichopoda]	0.51	0.92	0.15	4.81	4.48	5.18	0.53	4.82
GO:0006952	defense response	biological_process	5	0	TRINITY_DN38167_c1_g1	-2.09798	down	MLO11	hypothetical protein CICLE_v10007869mg [Citrus clementina]	1.59	2.56	3.02	18.19	16.69	17.1	2.39	17.33
GO:0006952	defense response	biological_process	5	0	TRINITY_DN38188_c0_g2	-1.29618	down	-	PREDICTED: uncharacterized protein LOC103995438 [Musa acuminata subsp. malaccensis]	2.01	2.89	3.15	11.1	12.26	10.55	2.68	11.3
GO:0006952	defense response	biological_process	5	0	TRINITY_DN38222_c0_g2	-3.90476	down	-	unknown [Picea sitchensis]	0.14	0.12	0.06	2.7	2.09	1.21	0.11	2
GO:0006952	defense response	biological_process	5	0	TRINITY_DN38222_c0_g4	1.05148	up	WRKY19	NB-ARC [Pinus tabuliformis]	0.88	0.89	0.95	0.64	0.82	0.79	0.91	0.75
GO:0006952	defense response	biological_process	5	0	TRINITY_DN38333_c3_g1	2.16973	up	-	PREDICTED: TMV resistance protein N [Amborella trichopoda]	0.73	1.23	1.39	0.57	0.32	0.37	1.12	0.42
GO:0006952	defense response	biological_process	5	0	TRINITY_DN38466_c2_g2	-1.84156	down	RPP1	unknown [Picea sitchensis]	5.92	11.53	6.72	39.58	50.62	44.7	8.06	44.97
GO:0006952	defense response	biological_process	5	0	TRINITY_DN38518_c1_g3	-2.74349	down	-	PREDICTED: uncharacterized protein LOC18430360 [Amborella trichopoda]	0.63	0.76	0.58	8.26	8.82	6.47	0.66	7.85
GO:0006952	defense response	biological_process	5	0	TRINITY_DN38529_c1_g1	-5.0092	down	FLS2	LRR receptor-like serine/threonine-protein kinase GSO1 [Ananas comosus]	0.03	0.18	0.03	4.03	4.12	4.6	0.08	4.25
GO:0006952	defense response	biological_process	5	0	TRINITY_DN38632_c0_g1	-6.83262	down	-	TIR/NBS, partial [Pinus taeda]	0.19	0.12	1.77	147.37	127.24	94	0.69	122.87
GO:0006952	defense response	biological_process	5	0	TRINITY_DN38632_c0_g3	1.6	up	At4g11170	unknown [Picea sitchensis]	1.74	2.49	2.7	1.56	1.32	1.01	2.31	1.3
GO:0006952	defense response	biological_process	5	0	TRINITY_DN38888_c0_g1	-1.77	down	At4g19050	PREDICTED: TMV resistance protein N-like [Eucalyptus grandis]	11.12	21.64	12.28	118.92	90.16	107.36	15.01	105.48
GO:0006952	defense response	biological_process	5	0	TRINITY_DN38930_c1_g2	2.48877	up	CRK29	PREDICTED: uncharacterized protein LOC18597062 [Theobroma cacao]	2.99	3.18	3.21	2.19	3.42	2.66	3.13	2.76
GO:0006952	defense response	biological_process	5	0	TRINITY_DN38930_c2_g1	-1.36487	down	LRR-RLK	unknown [Picea sitchensis]	3.11	11.32	13.08	39.71	33.99	50.86	9.17	41.52
GO:0006952	defense response	biological_process	5	0	TRINITY_DN38941_c2_g2	1.37572	up	-	retrovirus-related Pol polyprotein from transposon TNT 1-94, partial [Dorcoceras hygrometricum]	6.66	12.58	9.85	7.04	3.98	2.98	9.7	4.67
GO:0006952	defense response	biological_process	5	0	TRINITY_DN18680_c0_g2	-6.30013	down	RPM1	unknown [Picea sitchensis]	0.01	0	0.06	3.16	3.13	3.66	0.02	3.32
GO:0006952	defense response	biological_process	5	0	TRINITY_DN23695_c0_g2	8.45786	up	PUB23	unknown [Picea sitchensis]	8.75	6.44	6.79	0.07	0.02	0.01	7.33	0.03
GO:0006952	defense response	biological_process	5	0	TRINITY_DN24166_c0_g1	-9.55226	down	-	unknown [Picea sitchensis]	0	0	0	2.73	3.11	2.82	0	2.89
GO:0006952	defense response	biological_process	5	0	TRINITY_DN26103_c0_g1	1.82564	up	-	unknown [Picea sitchensis]	0.78	1.25	1.61	0.6	0.46	0.75	1.21	0.6
GO:0006952	defense response	biological_process	5	0	TRINITY_DN26121_c0_g1	-11.1292	down	YLS9	unknown [Picea sitchensis]	0	0	0.02	34.51	35.75	36.72	0.01	35.66
GO:0006952	defense response	biological_process	5	0	TRINITY_DN26300_c0_g1	-4.03798	down	TAO1	predicted protein [Physcomitrella patens]	0.01	0.06	0.06	1.48	1.1	1.05	0.04	1.21
GO:0006952	defense response	biological_process	5	0	TRINITY_DN27242_c0_g1	8.38944	up	ERF1B	ERF15 [Taxus wallichiana var. chinensis]	75.42	10.46	2.73	0.22	0.2	0.1	29.54	0.17
GO:0006952	defense response	biological_process	5	0	TRINITY_DN28348_c0_g3	1.81421	up	FLS2	Leucine-rich repeat-containing protein [Cynara cardunculus var. scolymus]	0.76	1.09	0.73	0.41	0.38	0.46	0.86	0.42
GO:0006952	defense response	biological_process	5	0	TRINITY_DN28449_c0_g2	-8.52752	down	TAO1	predicted protein [Physcomitrella patens]	0	0.01	0	2.25	1.95	1.81	0	2
GO:0006952	defense response	biological_process	5	0	TRINITY_DN28930_c0_g1	-1.11029	down	CRL	unknown [Picea sitchensis]	3.23	6.22	5.88	15.6	17.54	18.5	5.11	17.21
GO:0006952	defense response	biological_process	5	0	TRINITY_DN29297_c0_g1	-4.28851	down	ERF12	ERF1 [Pinus tabuliformis]	0.5	0.07	0.09	7.03	9.64	8.2	0.22	8.29
GO:0006952	defense response	biological_process	5	0	TRINITY_DN29390_c0_g3	6.12179	up	TAO1	predicted protein [Physcomitrella patens]	0.88	1.57	1.39	0.03	0.02	0.04	1.28	0.03
GO:0006952	defense response	biological_process	5	0	TRINITY_DN29413_c0_g2	-1.92785	down	NHL12	unknown [Picea sitchensis]	10.41	29.16	60.13	158.74	257.89	203.25	33.23	206.63
GO:0006952	defense response	biological_process	5	0	TRINITY_DN29874_c0_g1	-7.37343	down	RBOHF	hypothetical protein SELMODRAFT_121926 [Selaginella moellendorffii]	0.01	0.01	0	1.73	2.95	2.49	0.01	2.39
GO:0006952	defense response	biological_process	5	0	TRINITY_DN30462_c0_g1	-8.74558	down	At5g66910	hypothetical protein POPTR_0005s03260g [Populus trichocarpa]	0	0.09	0	27.85	26.68	27.35	0.03	27.29
GO:0006952	defense response	biological_process	5	0	TRINITY_DN31000_c0_g1	-9.10949	down	At5g01750	PREDICTED: protein LURP-one-related 15-like [Setaria italica]	0	0.05	0	12.93	14.25	11.13	0.02	12.77
GO:0006952	defense response	biological_process	5	0	TRINITY_DN31128_c2_g1	-2.14878	down	At5g04720	unknown [Picea sitchensis]	1.39	1.44	1.01	7.64	10.71	10.89	1.28	9.75
GO:0006952	defense response	biological_process	5	0	TRINITY_DN31359_c0_g1	-1.70528	down	RPP8L4	unknown [Picea sitchensis]	0.08	0.27	1.33	3.28	2.74	3.01	0.56	3.01
GO:0006952	defense response	biological_process	5	0	TRINITY_DN31360_c0_g1	-2.75214	down	lrrcc1	PREDICTED: TMV resistance protein N-like [Eucalyptus grandis]	0.22	0.68	0.66	5.43	6.81	5.5	0.52	5.91
GO:0006952	defense response	biological_process	5	0	TRINITY_DN31360_c0_g2	-2.62972	down	At4g19050	unknown [Picea sitchensis]	0.2	0.57	0.98	5.8	6.5	5.83	0.58	6.04
GO:0006952	defense response	biological_process	5	0	TRINITY_DN31479_c0_g1	1.03499	up	LYM1	PREDICTED: lysM domain-containing GPI-anchored protein 1 isoform X1 [Amborella trichopoda]	42.04	51.48	41.65	38.67	38.54	37.3	45.06	38.17
GO:0006952	defense response	biological_process	5	0	TRINITY_DN31527_c0_g2	-1.91034	down	At5g47250	hypothetical protein CISIN_1g047642mg, partial [Citrus sinensis]	0.37	2.07	2.62	8.74	10.85	11.67	1.69	10.42
GO:0006952	defense response	biological_process	5	0	TRINITY_DN31867_c0_g1	-2.81232	down	RPS2	unknown [Picea sitchensis]	0.34	0.78	2.49	15.05	12.85	19.81	1.2	15.9
GO:0006952	defense response	biological_process	5	0	TRINITY_DN32048_c2_g1	-5.48485	down	CNGC2	Cyclic nucleotide-gated ion channel 2 [Anthurium amnicola]	0.07	0	0	2.37	2.13	2.28	0.02	2.26
GO:0006952	defense response	biological_process	5	0	TRINITY_DN32132_c1_g1	2.91102	up	-	stearoyl-ACP desaturase [Ginkgo biloba]	49.04	23.68	22.99	11.26	6.8	5.45	31.9	7.84
GO:0006952	defense response	biological_process	5	0	TRINITY_DN32295_c0_g1	-1.24645	down	-	unknown [Picea sitchensis]	4.25	5.62	7.6	30.63	24.49	18.11	5.82	24.41
GO:0006952	defense response	biological_process	5	0	TRINITY_DN32295_c0_g2	-1.56769	down	MIK1	unknown [Picea sitchensis]	2.08	2.99	4.81	20.46	15.36	13.88	3.29	16.57
GO:0006952	defense response	biological_process	5	0	TRINITY_DN32516_c0_g3	2.9411	up	-	PREDICTED: TMV resistance protein N-like [Juglans regia]	0.63	0.62	0.88	0.27	0.07	0.13	0.71	0.16
GO:0006952	defense response	biological_process	5	0	TRINITY_DN32544_c0_g1	-2.64829	down	DGK4	PREDICTED: diacylglycerol kinase 7 [Amborella trichopoda]	0.62	0.88	0.74	5.87	8.45	9.76	0.75	8.03
GO:0006952	defense response	biological_process	5	0	TRINITY_DN32559_c0_g1	-1.27862	down	PXG2	unknown [Picea sitchensis]	0.98	3.97	9.19	13.68	24.29	21.77	4.71	19.91
GO:0006952	defense response	biological_process	5	0	TRINITY_DN32576_c0_g1	-1.97608	down	NIK3	PREDICTED: protein NSP-INTERACTING KINASE 3 [Nelumbo nucifera]	1.31	1.84	1.47	11.01	10.03	9.89	1.54	10.31
GO:0006952	defense response	biological_process	5	0	TRINITY_DN32770_c1_g6	-4.54809	down	-	putative TIR-NBS-LRR protein [Pinus monticola]	0.02	0.08	0.01	1.25	1.75	1.49	0.04	1.5
GO:0006952	defense response	biological_process	5	0	TRINITY_DN32808_c0_g1	-1.14741	down	lrrc57	unknown [Picea sitchensis]	1.56	1.02	0.43	3.78	3.57	2.65	1	3.33
GO:0006952	defense response	biological_process	5	0	TRINITY_DN39133_c0_g2	-8.29085	down	-	unknown [Picea sitchensis]	0	0	0	2.38	1.39	1.86	0	1.88
GO:0006952	defense response	biological_process	5	0	TRINITY_DN39170_c1_g2	-1.06172	down	DGK5	PREDICTED: diacylglycerol kinase 5-like isoform X3 [Solanum tuberosum]	7.83	8.35	9.22	25.84	29.54	25.68	8.47	27.02
GO:0006952	defense response	biological_process	5	0	TRINITY_DN39180_c0_g2	-5.62013	down	At1g59780	PREDICTED: probable disease resistance RPP8-like protein 2 [Tarenaya hassleriana]	0.07	0.05	0.04	6.87	4.08	7	0.05	5.98
GO:0006952	defense response	biological_process	5	0	TRINITY_DN39209_c0_g2	-1.86051	down	SD11	unknown [Picea sitchensis]	1.01	0.97	0.44	9.04	4.02	5.26	0.81	6.11
GO:0006952	defense response	biological_process	5	0	TRINITY_DN39277_c1_g1	-1.12927	down	-	unknown [Picea sitchensis]	7.49	22.1	15.59	64.49	51.72	48.15	15.06	54.79
GO:0006952	defense response	biological_process	5	0	TRINITY_DN39330_c0_g3	-1.14616	down	At4g14610	PREDICTED: putative disease resistance protein RGA3 isoform X1 [Elaeis guineensis]	3.23	6.37	6.6	23.35	21.13	30.24	5.4	24.91
GO:0006952	defense response	biological_process	5	0	TRINITY_DN39635_c0_g4	-5.24124	down	At1g73050	unknown [Picea sitchensis]	0.07	0.74	2.83	66.19	78.38	81.53	1.21	75.37
GO:0006952	defense response	biological_process	5	0	TRINITY_DN39635_c0_g5	-3.11849	down	At1g73050	putative oxidoreductase [Taxus baccata]	0.02	0.13	0.16	1	1.52	1.95	0.1	1.49
GO:0006952	defense response	biological_process	5	0	TRINITY_DN39635_c0_g6	-3.85411	down	At1g73050	putative oxidoreductase [Taxus baccata]	0.22	0.6	1.86	16.66	24.5	23.78	0.89	21.65
GO:0006952	defense response	biological_process	5	0	TRINITY_DN39722_c0_g3	1.42175	up	ATL2	unknown [Picea sitchensis]	2.53	1.08	1.32	0.95	1.44	1.02	1.64	1.14
GO:0006952	defense response	biological_process	5	0	TRINITY_DN39783_c0_g3	-5.2693	down	At3g15810	unknown [Picea sitchensis]	1.3	0.08	0.1	34.84	43.02	36.81	0.49	38.22
GO:0006952	defense response	biological_process	5	0	TRINITY_DN39795_c0_g1	-1.65733	down	MLO1	unknown [Picea sitchensis]	3.44	6.3	6.63	32.48	31.28	27.49	5.46	30.42
GO:0006952	defense response	biological_process	5	0	TRINITY_DN39795_c0_g2	-5.32683	down	MLO1	PREDICTED: MLO-like protein 1 [Phoenix dactylifera]	0.04	0.08	0.01	3.24	3.74	2.45	0.04	3.14
GO:0006952	defense response	biological_process	5	0	TRINITY_DN39813_c3_g1	-8.41379	down	TAO1	unknown [Picea sitchensis]	0	0	0.01	2.91	3.01	2.69	0	2.87
GO:0006952	defense response	biological_process	5	0	TRINITY_DN39923_c2_g3	-7.35758	down	ESAG8	PREDICTED: TMV resistance protein N-like [Eucalyptus grandis]	0.05	0.9	1.34	25.05	19.86	18.75	0.76	21.22
GO:0006952	defense response	biological_process	5	0	TRINITY_DN40002_c0_g3	-1.30198	down	AMC1	unnamed protein product [Coffea canephora]	0.17	0.39	0.25	1.32	0.8	1.25	0.27	1.12
GO:0006952	defense response	biological_process	5	0	TRINITY_DN40126_c0_g2	1.54046	up	WRKY19	BnaA09g29610D [Brassica napus]	1.76	1.74	0.95	1.4	1.5	1.26	1.48	1.39
GO:0006952	defense response	biological_process	5	0	TRINITY_DN40300_c0_g5	-3.45527	down	RPP4	NBS/LRR, partial [Pinus taeda]	0.43	0.58	0.3	9.36	8.37	7.26	0.44	8.33
GO:0006952	defense response	biological_process	5	0	TRINITY_DN40401_c1_g1	2.21708	up	TAO1	hypothetical protein POPTR_0005s03260g [Populus trichocarpa]	0.75	0.95	1.99	0.64	0.37	0.33	1.23	0.45
GO:0006952	defense response	biological_process	5	0	TRINITY_DN40408_c1_g1	-1.28549	down	TAO1	unknown [Picea sitchensis]	1.57	4.6	4.2	27.27	22.89	25.14	3.46	25.1
GO:0006952	defense response	biological_process	5	0	TRINITY_DN40508_c0_g7	1.66402	up	CRK2	PREDICTED: cysteine-rich receptor-like protein kinase 2 [Amborella trichopoda]	2.79	2.49	0.42	0.79	1.47	0.96	1.9	1.07
GO:0006952	defense response	biological_process	5	0	TRINITY_DN40796_c0_g2	-1.87436	down	RDR1	hypothetical protein AMTR_s00176p00039530 [Amborella trichopoda]	1.87	4.55	3	18.04	19.62	19.92	3.14	19.19
GO:0006952	defense response	biological_process	5	0	TRINITY_DN40902_c0_g2	-3.17779	down	PXC2	unknown [Picea sitchensis]	0.83	0.41	1.63	8.43	13.61	13.89	0.96	11.98
GO:0006952	defense response	biological_process	5	0	TRINITY_DN41000_c0_g2	-1.64118	down	SAG101	unknown [Picea sitchensis]	13.2	21.25	14.42	75.4	104.39	82.9	16.29	87.56
GO:0006952	defense response	biological_process	5	0	TRINITY_DN41013_c2_g1	-1.39017	down	RPP1	unknown [Picea sitchensis]	3.67	4.63	9.61	24.79	26.7	25.11	5.97	25.53
GO:0006952	defense response	biological_process	5	0	TRINITY_DN41194_c2_g1	-1.75621	down	FLS2	hypothetical protein POPTR_0001s27000g [Populus trichocarpa]	0.09	1.09	4.48	9.81	9.19	12.04	1.89	10.35
GO:0006952	defense response	biological_process	5	0	TRINITY_DN41235_c0_g1	-2.52211	down	-	putative TIR/NBS/LRR disease resistance protein, partial [Pinus taeda]	1.61	5.21	5.3	30.89	31.48	36.91	4.04	33.09
GO:0006952	defense response	biological_process	5	0	TRINITY_DN41274_c0_g1	-7.64998	down	-	PREDICTED: TMV resistance protein N-like [Nelumbo nucifera]	0	0	0.02	2.93	1.92	2.27	0.01	2.37
GO:0006952	defense response	biological_process	5	0	TRINITY_DN41274_c0_g5	-8.29819	down	TAO1	PREDICTED: TMV resistance protein N-like [Nelumbo nucifera]	0	0	0	1.3	1.49	1.15	0	1.31
GO:0006952	defense response	biological_process	5	0	TRINITY_DN41277_c0_g1	-3.21689	down	WRKY19	predicted protein [Physcomitrella patens]	1.08	3.14	0.13	22.62	18.41	23.41	1.45	21.48
GO:0006952	defense response	biological_process	5	0	TRINITY_DN41330_c1_g1	-5.52957	down	AAE20	PREDICTED: benzoate--CoA ligase, peroxisomal-like [Capsicum annuum]	0.18	0.08	0	7.19	10.07	4.76	0.09	7.34
GO:0006952	defense response	biological_process	5	0	TRINITY_DN41413_c0_g3	-1.09535	down	At1g61400	hypothetical protein TSUD_175760 [Trifolium subterraneum]	0.87	2.01	1.15	4.26	2.25	7.04	1.34	4.52
GO:0006952	defense response	biological_process	5	0	TRINITY_DN41437_c3_g1	5.35033	up	-	hypothetical protein POPTR_0005s030202g, partial [Populus trichocarpa]	1.88	3.4	7.58	0.46	0.03	0.02	4.29	0.17
GO:0006952	defense response	biological_process	5	0	TRINITY_DN41569_c1_g2	-3.85374	down	RPP13L4	unknown [Picea sitchensis]	0.03	0.07	0.06	1.23	1.52	1.28	0.05	1.34
GO:0006952	defense response	biological_process	5	0	TRINITY_DN41628_c0_g2	7.09012	up	-	Chitinase / Hevein / PR-4 / Wheatwin2 [Medicago truncatula]	661.61	643.86	649.72	24.31	0.47	0.39	651.73	8.39
GO:0006952	defense response	biological_process	5	0	TRINITY_DN41696_c0_g2	-1.0302	down	-	putative rp3 protein [Zea mays]	1.03	1.77	0.94	3.75	4.95	4.42	1.25	4.37
GO:0006952	defense response	biological_process	5	0	TRINITY_DN41724_c0_g4	-9.82805	down	At5g04720	unknown [Picea sitchensis]	0	0	0	1.46	1.42	1.4	0	1.43
GO:0006952	defense response	biological_process	5	0	TRINITY_DN41747_c0_g2	5.04871	up	TAO1	PREDICTED: disease resistance protein TAO1-like [Ipomoea nil]	1	3.1	1.43	0.19	0.02	0.06	1.84	0.09
GO:0006952	defense response	biological_process	5	0	TRINITY_DN41767_c0_g1	-1.26481	down	RPP1	predicted protein [Physcomitrella patens]	4.81	13.56	7.58	20.17	31.26	29.97	8.65	27.13
GO:0006952	defense response	biological_process	5	0	TRINITY_DN41767_c0_g2	2.17026	up	TAO1	hypothetical protein EUGRSUZ_B01867 [Eucalyptus grandis]	2.5	7.19	7.5	4.12	3.91	1.62	5.73	3.22
GO:0006952	defense response	biological_process	5	0	TRINITY_DN41776_c0_g1	-1.69452	down	RAMDAZC7	unknown [Picea sitchensis]	38.61	52.27	15.99	117.05	162.41	165.33	35.62	148.26
GO:0006952	defense response	biological_process	5	0	TRINITY_DN41797_c0_g7	-2.95192	down	At1g73050	putative oxidoreductase [Taxus baccata]	0.24	0.09	1.62	24.74	0.8	0.03	0.65	8.52
GO:0006952	defense response	biological_process	5	0	TRINITY_DN41854_c1_g3	-3.00349	down	CESA5	PREDICTED: probable cellulose synthase A catalytic subunit 3 [UDP-forming] [Prunus mume]	4.16	9.33	22.73	143.85	167.58	149.49	12.07	153.64
GO:0006952	defense response	biological_process	5	0	TRINITY_DN41950_c1_g2	-5.28895	down	TAO1	unknown [Picea sitchensis]	0.1	0.91	0.17	23.42	21.27	29.93	0.39	24.87
GO:0006952	defense response	biological_process	5	0	TRINITY_DN41950_c1_g3	-5.31987	down	-	PREDICTED: uncharacterized protein LOC104445431 [Eucalyptus grandis]	0.02	0.64	0.08	17.42	15.93	22.43	0.25	18.59
GO:0006952	defense response	biological_process	5	0	TRINITY_DN41953_c0_g3	-8.55472	down	TAO1	predicted protein [Physcomitrella patens]	0	0.03	0	8.06	4.88	6.7	0.01	6.55
GO:0006952	defense response	biological_process	5	0	TRINITY_DN42028_c0_g1	-1.02162	down	TAO1	predicted protein [Physcomitrella patens]	2.03	4.4	2.48	8.46	7.48	8.03	2.97	7.99
GO:0006952	defense response	biological_process	5	0	TRINITY_DN42110_c1_g2	-1.64187	down	MLO11	hypothetical protein CICLE_v10007869mg [Citrus clementina]	1.89	1.96	2.59	11.53	11.88	10.7	2.15	11.37
GO:0006952	defense response	biological_process	5	0	TRINITY_DN42148_c0_g2	-2.48961	down	CSA1	hypothetical protein EUGRSUZ_B01950 [Eucalyptus grandis]	0.36	0.5	0	2.34	2.53	2.24	0.29	2.37
GO:0006952	defense response	biological_process	5	0	TRINITY_DN42148_c0_g3	-1.13733	down	RGA1	predicted protein [Physcomitrella patens]	2.73	12.01	7.7	26.36	18.66	21.8	7.48	22.27
GO:0006952	defense response	biological_process	5	0	TRINITY_DN42151_c0_g1	-7.42818	down	FLS2	hypothetical protein, partial [Cryptomeria japonica]	0.06	0.07	0.01	14.88	11.1	16	0.05	13.99
GO:0006952	defense response	biological_process	5	0	TRINITY_DN42343_c0_g1	-1.80077	down	-	putative TIR/NBS/LRR disease resistance protein, partial [Pinus taeda]	1.41	3	2.63	13.33	14.17	14.79	2.35	14.1
GO:0006952	defense response	biological_process	5	0	TRINITY_DN42351_c1_g3	2.05917	up	-	PREDICTED: TMV resistance protein N-like isoform X1 [Solanum tuberosum]	6.06	5.04	3.11	2.63	1.63	1.59	4.74	1.95
GO:0006952	defense response	biological_process	5	0	TRINITY_DN42351_c1_g6	3.57345	up	RLM1A	hypothetical protein EUTSA_v10023218mg [Eutrema salsugineum]	1.77	2.54	1.39	0.24	0.3	0.28	1.9	0.27
GO:0006952	defense response	biological_process	5	0	TRINITY_DN42476_c1_g5	-3.57515	down	CRK6	unknown [Picea sitchensis]	0.18	0.76	0.12	7.69	5.56	6.37	0.35	6.54
GO:0006952	defense response	biological_process	5	0	TRINITY_DN42724_c0_g1	1.91335	up	RLP12	PREDICTED: LRR receptor-like serine/threonine-protein kinase RCH1 [Phoenix dactylifera]	2.63	4.31	7.19	2.93	1.73	2.48	4.71	2.38
GO:0006952	defense response	biological_process	5	0	TRINITY_DN42732_c1_g3	-6.64494	down	-	PREDICTED: LOW QUALITY PROTEIN: LRR receptor-like serine/threonine-protein kinase GSO2 [Amborella trichopoda]	0.14	0	0	14.36	11.88	7.61	0.05	11.28
GO:0006952	defense response	biological_process	5	0	TRINITY_DN42747_c0_g2	-2.38649	down	CSA1	Protein popC [Aegilops tauschii]	0.48	1.2	0.02	13.42	13.95	15.1	0.57	14.16
GO:0006952	defense response	biological_process	5	0	TRINITY_DN42803_c1_g3	2.28304	up	ERF1A	unknown [Picea sitchensis]	48.67	27.16	21.33	14.84	12.49	9.23	32.39	12.19
GO:0006952	defense response	biological_process	5	0	TRINITY_DN42815_c0_g1	-6.74756	down	-	putative TIR-NBS-LRR protein [Pinus monticola]	0.01	1.78	0.99	25.32	23.11	22.79	0.93	23.74
GO:0006952	defense response	biological_process	5	0	TRINITY_DN42850_c0_g1	3.05616	up	PTI5	PREDICTED: ethylene-responsive transcription factor 15 [Amborella trichopoda]	8.59	5.55	3.55	0.83	1.58	1.47	5.9	1.29
GO:0006952	defense response	biological_process	5	0	TRINITY_DN42851_c0_g1	-1.42627	down	At1g63350	PREDICTED: TMV resistance protein N-like [Eucalyptus grandis]	0.37	0.53	0.8	2.54	2.56	2.66	0.57	2.59
GO:0006952	defense response	biological_process	5	0	TRINITY_DN42904_c0_g4	-3.97479	down	-	unknown [Picea sitchensis]	0.12	0	0.02	1.11	1.04	2.14	0.05	1.43
GO:0006952	defense response	biological_process	5	0	TRINITY_DN42930_c0_g6	-1.17838	down	DDB_G0278509	hypothetical protein EUGRSUZ_K01432 [Eucalyptus grandis]	1.22	2.85	2.39	8.23	7.96	6.59	2.15	7.59
GO:0006952	defense response	biological_process	5	0	TRINITY_DN42952_c0_g1	-4.51384	down	At3g15810	unknown [Picea sitchensis]	0.16	0.19	0.21	7.11	8.05	4.58	0.19	6.58
GO:0006952	defense response	biological_process	5	0	TRINITY_DN42975_c1_g1	-1.19221	down	TAO1	NBS-LRR disease resistance protein homologue [Hordeum vulgare]	2.27	3.45	4.97	13.75	13.59	12.91	3.56	13.42
GO:0006952	defense response	biological_process	5	0	TRINITY_DN43012_c0_g2	-1.03194	down	RPP1	PREDICTED: TMV resistance protein N [Amborella trichopoda]	0.89	1.9	1.1	4.05	3.88	4.82	1.3	4.25
GO:0006952	defense response	biological_process	5	0	TRINITY_DN43157_c0_g1	-1.05312	down	RPP1	hypothetical protein AALP_AA1G281200 [Arabis alpina]	2.61	4.59	4.01	13.35	12.24	13.88	3.74	13.16
GO:0006952	defense response	biological_process	5	0	TRINITY_DN43171_c0_g2	-1.42731	down	LAZ5	unknown [Picea sitchensis]	0.69	1.21	1.17	3.58	4.88	3.16	1.02	3.87
GO:0006952	defense response	biological_process	5	0	TRINITY_DN43231_c0_g2	3.30371	up	ERECTA	hypothetical protein SETIT_028102mg [Setaria italica]	2.67	3.72	0.86	0.28	0.32	0.41	2.42	0.34
GO:0006952	defense response	biological_process	5	0	TRINITY_DN43475_c0_g2	-1.8254	down	ADR1	putative TIR-NBS-LRR protein [Pinus monticola]	0.06	0.18	0.77	1.62	2.31	1.37	0.34	1.77
GO:0006952	defense response	biological_process	5	0	TRINITY_DN43546_c0_g1	-9.56219	down	popC	predicted protein [Physcomitrella patens]	0	0.01	0.03	19.31	15.51	22.09	0.01	18.97
GO:0006952	defense response	biological_process	5	0	TRINITY_DN43547_c0_g1	-1.51556	down	RPP1	putative TIR/NBS/LRR disease resistance protein, partial [Pinus taeda]	4.62	6.67	5.47	23.27	24.1	15.05	5.59	20.81
GO:0006952	defense response	biological_process	5	0	TRINITY_DN43642_c2_g3	2.18128	up	SD22	hypothetical protein EUGRSUZ_F008423, partial [Eucalyptus grandis]	12.41	14.57	6.01	6.87	3.5	2.61	11	4.33
GO:0006952	defense response	biological_process	5	0	TRINITY_DN43671_c0_g1	-2.68442	down	RF45	PREDICTED: disease resistance protein RPM1-like isoform X1 [Ipomoea nil]	0.12	0.32	0.38	3.91	3.44	3.3	0.27	3.55
GO:0006952	defense response	biological_process	5	0	TRINITY_DN43672_c0_g1	-3.85029	down	RXW24L	PREDICTED: disease resistance protein RPM1-like isoform X1 [Nelumbo nucifera]	0.57	0.73	0.71	9.94	8.59	13.07	0.67	10.53
GO:0006952	defense response	biological_process	5	0	TRINITY_DN43688_c0_g1	-4.94978	down	TAO1	hypothetical protein SORBIDRAFT_08g022995, partial [Sorghum bicolor]	0.07	1.09	0.38	22.38	24.68	28.46	0.51	25.17
GO:0006952	defense response	biological_process	5	0	TRINITY_DN43688_c0_g6	-4.52943	down	popC	PREDICTED: leucine-rich repeat protein soc-2 homolog [Eucalyptus grandis]	0.15	0.89	0.28	14.68	15.32	19.47	0.44	16.49
GO:0006952	defense response	biological_process	5	0	TRINITY_DN43867_c2_g1	1.70952	up	ERF1A	Ethylene-responsive transcription factor 5 [Cajanus cajan]	9.74	20.29	8.12	10.75	12.1	9.73	12.72	10.86
GO:0006952	defense response	biological_process	5	0	TRINITY_DN44023_c4_g1	-1.61297	down	RGA2	PREDICTED: putative disease resistance protein RGA3 [Gossypium hirsutum]	0.35	0.26	0.36	1.27	1.45	2.17	0.32	1.63
GO:0006952	defense response	biological_process	5	0	TRINITY_DN44032_c0_g2	-2.48258	down	EDS1	unknown [Picea sitchensis]	4.77	11.32	4.99	66.98	63.87	63.14	7.03	64.66
GO:0006952	defense response	biological_process	5	0	TRINITY_DN44061_c0_g3	-1.29138	down	At1g61180	unknown [Picea sitchensis]	2.41	2.62	4.04	15.9	13.53	21.7	3.02	17.04
GO:0006952	defense response	biological_process	5	0	TRINITY_DN44219_c0_g1	-2.01603	down	TAO1	unknown [Picea sitchensis]	4.85	8.29	7.85	53	44.32	42.39	7	46.57
GO:0006952	defense response	biological_process	5	0	TRINITY_DN44243_c5_g1	-1.54333	down	At5g47280	PREDICTED: disease resistance protein RML1A-like [Ipomoea nil]	1.42	2.65	2.2	11.4	12.52	7.4	2.09	10.44
GO:0006952	defense response	biological_process	5	0	TRINITY_DN44306_c0_g1	-1.59221	down	RPPL1	unknown [Picea sitchensis]	1.09	1.79	1.89	12.45	10.38	7.84	1.59	10.22
GO:0006952	defense response	biological_process	5	0	TRINITY_DN44313_c0_g2	-1.2932	down	-	unknown [Picea sitchensis]	0.59	2.25	2.48	6.86	7.91	7.65	1.77	7.47
GO:0006952	defense response	biological_process	5	0	TRINITY_DN44327_c0_g2	-2.43615	down	PAL	phenylalanine ammonia lyase [Cunninghamia lanceolata]	1.15	1.58	1.71	11.33	13.25	16.53	1.48	13.7
GO:0006952	defense response	biological_process	5	0	TRINITY_DN44332_c0_g5	-1.71786	down	VICTR	putative TIR/NBS/LRR disease resistance protein, partial [Pinus taeda]	0.08	0.21	0.31	1.26	0.92	1.18	0.2	1.12
GO:0006952	defense response	biological_process	5	0	TRINITY_DN44384_c0_g3	-1.36362	down	BON1	unknown [Picea sitchensis]	6.37	6.58	6.31	28.25	31.89	26.68	6.42	28.94
GO:0006952	defense response	biological_process	5	0	TRINITY_DN44433_c0_g1	-9.43733	down	EDS1	unknown [Picea sitchensis]	0.04	0	0	17.48	16.23	13.74	0.01	15.82
GO:0006952	defense response	biological_process	5	0	TRINITY_DN44489_c0_g2	-6.98081	down	TAO1	unknown [Picea sitchensis]	0.02	0.03	0.11	14.56	10.87	16.11	0.05	13.85
GO:0006952	defense response	biological_process	5	0	TRINITY_DN44503_c0_g2	-1.86883	down	EDS1	unknown [Picea sitchensis]	2.03	6.13	8.9	37.12	35.55	35.57	5.69	36.08
GO:0006952	defense response	biological_process	5	0	TRINITY_DN44521_c0_g5	1.42718	up	ATL2	unknown [Picea sitchensis]	1.81	0.97	0.45	0.72	1.11	0.39	1.08	0.74
GO:0006952	defense response	biological_process	5	0	TRINITY_DN44540_c0_g1	-1.87018	down	At4g33300	unknown [Picea sitchensis]	2.56	4.58	4.5	21.4	32.4	22.41	3.88	25.4
GO:0006952	defense response	biological_process	5	0	TRINITY_DN44604_c0_g1	-1.93131	down	RPP1	hypothetical protein EUGRSUZ_B01950 [Eucalyptus grandis]	2.7	5.86	1.74	29.05	26.31	23.27	3.43	26.21
GO:0006952	defense response	biological_process	5	0	TRINITY_DN44761_c1_g4	1.43746	up	At4g36180	serine-threonine protein kinase, plant-type, putative [Ricinus communis]	0.77	1.26	0.37	0.88	0.4	0.22	0.8	0.5
GO:0006952	defense response	biological_process	5	0	TRINITY_DN44841_c1_g3	-6.37675	down	-	unknown [Picea sitchensis]	0	0.08	0.15	12.49	14.29	12.84	0.08	13.21
GO:0006952	defense response	biological_process	5	0	TRINITY_DN44841_c1_g5	-2.31893	down	CRK8	unknown [Picea sitchensis]	1.6	0.88	0.85	7.36	5.36	5.6	1.11	6.11
GO:0006952	defense response	biological_process	5	0	TRINITY_DN44888_c0_g10	2.91035	up	At1g73050	putative oxidoreductase [Taxus baccata]	16.87	21.25	15.9	11.48	0.88	0.07	18.01	4.14
GO:0006952	defense response	biological_process	5	0	TRINITY_DN44888_c0_g5	1.0244	up	At1g73050	putative oxidoreductase [Taxus baccata]	26.7	38.58	36.44	28.55	29.49	28.01	33.91	28.68
GO:0006952	defense response	biological_process	5	0	TRINITY_DN44938_c0_g1	4.39909	up	At2g43610	unknown [Picea sitchensis]	875.17	1173.44	806.79	64.3	49.96	72.18	951.8	62.15
GO:0006952	defense response	biological_process	5	0	TRINITY_DN44938_c0_g3	6.99396	up	At2g43620	class IV chitinase [Cryptomeria japonica]	2.45	11.25	2.51	0	0.21	0	5.4	0.07
GO:0006952	defense response	biological_process	5	0	TRINITY_DN44938_c0_g4	3.45876	up	At2g43620	chitinase [Chenopodium amaranticolor]	3.19	2.39	1.51	0.32	0.6	0.24	2.36	0.39
GO:0006952	defense response	biological_process	5	0	TRINITY_DN45035_c0_g5	-11.1787	down	RPPL1	Nbs-lrr resistance protein, putative isoform 1 [Theobroma cacao]	0	0	0	30.43	27.13	32.76	0	30.11
GO:0006952	defense response	biological_process	5	0	TRINITY_DN45154_c1_g1	4.99439	up	MDL1	putative oxidoreductase [Taxus baccata]	174.27	106.98	19.13	14.15	2.82	0.05	100.13	5.67
GO:0006952	defense response	biological_process	5	0	TRINITY_DN45186_c0_g1	-1.83794	down	At4g11170	putative truncated TIR-NBS-LRR protein [Pinus monticola]	1.45	1.14	1.76	8.9	8.28	9.65	1.45	8.94
GO:0006952	defense response	biological_process	5	0	TRINITY_DN45190_c1_g1	-6.93869	down	MLO1	unknown [Picea sitchensis]	0.06	0.04	0	9.5	11.45	12.59	0.03	11.18
GO:0006952	defense response	biological_process	5	0	TRINITY_DN45207_c0_g1	-1.47637	down	At4g33300	unknown [Picea sitchensis]	2.21	4.73	3.44	15.34	17.62	15.22	3.46	16.06
GO:0006952	defense response	biological_process	5	0	TRINITY_DN45230_c0_g1	4.56216	up	CSA1	predicted protein [Physcomitrella patens]	15.69	12.42	8.31	0.8	0.56	0.47	12.14	0.61
GO:0006952	defense response	biological_process	5	0	TRINITY_DN45283_c0_g4	-7.22307	down	GSO2	LRR receptor-like kinase family protein [Medicago truncatula]	0	0.1	0	11.82	7.81	4.57	0.03	8.07
GO:0006952	defense response	biological_process	5	0	TRINITY_DN45354_c0_g1	-5.2148	down	TAO1	unknown [Picea sitchensis]	0.13	0.07	0.03	2.66	2.96	3.43	0.08	3.02
GO:0006952	defense response	biological_process	5	0	TRINITY_DN45448_c1_g1	-1.4786	down	PAL	unknown [Picea sitchensis]	5.01	10.28	4.3	25.36	39.16	27.66	6.53	30.73
GO:0006952	defense response	biological_process	5	0	TRINITY_DN45448_c1_g3	1.16319	up	PAL	phenylalanine ammonia-lyase [Taxus wallichiana var. chinensis]	58.71	116.86	185.39	95.55	84.51	90.14	120.32	90.07
GO:0006952	defense response	biological_process	5	0	TRINITY_DN45448_c1_g4	1.39291	up	ZB8	phenylalanine ammonia lyase, partial [Taxus baccata]	54.08	115.76	43.92	38.64	47.39	50.94	71.25	45.66
GO:0006952	defense response	biological_process	5	0	TRINITY_DN45454_c0_g1	-2.02914	down	PIRL9	unknown [Picea sitchensis]	1.98	2.81	5.98	14.65	15.31	13.32	3.59	14.43
GO:0006952	defense response	biological_process	5	0	TRINITY_DN45454_c0_g5	-1.83632	down	CSA1	unknown [Picea sitchensis]	2.3	6.88	6.13	40.8	32.51	30.28	5.1	34.53
GO:0006952	defense response	biological_process	5	0	TRINITY_DN45472_c0_g2	-7.61324	down	GSO1	PREDICTED: LRR receptor-like serine/threonine-protein kinase GSO2 [Musa acuminata subsp. malaccensis]	0.01	0.02	0.02	6.46	3.59	3.53	0.02	4.53
GO:0006952	defense response	biological_process	5	0	TRINITY_DN45528_c0_g1	-4.33901	down	RLM1A	unknown [Picea sitchensis]	0.09	0.43	0.08	4.68	4.97	4.33	0.2	4.66
GO:0006952	defense response	biological_process	5	0	TRINITY_DN45556_c0_g1	1.64342	up	RLP30	hypothetical protein VITISV_017886 [Vitis vinifera]	3.13	5.7	4.8	2.68	2.42	2.66	4.54	2.59
GO:0006952	defense response	biological_process	5	0	TRINITY_DN45599_c0_g1	-2.33035	down	WRKY16	putative TIR-NBS-LRR protein [Pinus monticola]	0.74	1.04	2.49	5.3	4.71	3.58	1.42	4.53
GO:0006952	defense response	biological_process	5	0	TRINITY_DN45611_c1_g1	-8.60243	down	RPP1	unknown [Picea sitchensis]	0.01	0	0.01	3.1	3.42	3.11	0.01	3.21
GO:0006952	defense response	biological_process	5	0	TRINITY_DN45611_c1_g2	-9.87157	down	TAO1	unknown [Picea sitchensis]	0	0	0	3.5	3.44	2.29	0	3.08
GO:0006952	defense response	biological_process	5	0	TRINITY_DN45619_c0_g2	2.47302	up	At1g11330	PREDICTED: probable LRR receptor-like serine/threonine-protein kinase RFK1 isoform X1 [Daucus carota subsp. sativus]	29.16	44.86	37.02	15.4	13.79	7.95	37.01	12.38
GO:0006952	defense response	biological_process	5	0	TRINITY_DN45620_c0_g1	-1.49269	down	RPS5	PREDICTED: probable disease resistance protein RF45 [Amborella trichopoda]	0.05	0.17	0.66	1.03	1.74	1.42	0.29	1.4
GO:0006952	defense response	biological_process	5	0	TRINITY_DN45620_c0_g2	-3.80915	down	RPP13L4	hypothetical protein B456_007G365500 [Gossypium raimondii]	0.01	0.13	0.31	3.17	3.35	3.78	0.15	3.43
GO:0006952	defense response	biological_process	5	0	TRINITY_DN45620_c0_g4	-4.08311	down	RF45	PREDICTED: probable disease resistance protein RF9 [Gossypium raimondii]	0	0.16	0.45	5.46	4.72	6.19	0.2	5.46
GO:0006952	defense response	biological_process	5	0	TRINITY_DN45666_c1_g1	-1.12229	down	VICTR	unknown [Picea sitchensis]	5.35	9.39	8.69	27.71	28.78	24.24	7.81	26.91
GO:0006952	defense response	biological_process	5	0	TRINITY_DN45727_c0_g1	-1.30272	down	TAO1	putative TIR-NBS-LRR protein [Pinus monticola]	1.55	3.85	2.66	15.04	11.21	11.11	2.69	12.45
GO:0006952	defense response	biological_process	5	0	TRINITY_DN45776_c0_g1	-1.40549	down	DGK1	PREDICTED: diacylglycerol kinase 1-like [Malus domestica]	2.26	3.06	2.48	12.63	11.84	10.87	2.6	11.78
GO:0006952	defense response	biological_process	5	0	TRINITY_DN45791_c0_g2	-2.37962	down	At4g33300	putative protein [Arabidopsis thaliana]	1.42	1.74	1.67	11.46	12.47	11.92	1.61	11.95
GO:0006952	defense response	biological_process	5	0	TRINITY_DN45805_c0_g1	1.13982	up	At1g12290	PREDICTED: uncharacterized protein LOC18432675 [Amborella trichopoda]	3.14	4.7	3.68	5.32	3	2.74	3.84	3.69
GO:0006952	defense response	biological_process	5	0	TRINITY_DN45808_c1_g1	3.01714	up	ERF1A	hypothetical protein 0_3648_01, partial [Pinus taeda]	55.6	56.38	43.15	10.69	11.24	11.12	51.71	11.02
GO:0006952	defense response	biological_process	5	0	TRINITY_DN45862_c0_g1	2.08034	up	-	PREDICTED: uncharacterized protein LOC103714784 [Phoenix dactylifera]	67.71	46.22	21.15	20.9	19.46	19.83	45.03	20.06
GO:0006952	defense response	biological_process	5	0	TRINITY_DN45938_c0_g1	-2.95393	down	RRS1	putative truncated TIR-NBS-LRR protein [Pinus monticola]	0.69	1.71	2.55	36.18	23.73	34.3	1.65	31.4
GO:0006952	defense response	biological_process	5	0	TRINITY_DN45986_c2_g1	-2.11503	down	TAO1	PREDICTED: TMV resistance protein N-like [Eucalyptus grandis]	0.41	1.22	1.57	8.9	7.04	8.22	1.07	8.05
GO:0006952	defense response	biological_process	5	0	TRINITY_DN45986_c2_g2	-7.98331	down	RGA1	PREDICTED: disease resistance protein TAO1-like isoform X2 [Eucalyptus grandis]	0	0	0.01	1.65	1.16	1.15	0	1.32
GO:0006952	defense response	biological_process	5	0	TRINITY_DN46000_c0_g1	2.8085	up	YLS9	PREDICTED: protein YLS9 [Amborella trichopoda]	117.53	61.31	42.55	35.31	17.59	3.2	73.8	18.7
GO:0006952	defense response	biological_process	5	0	TRINITY_DN46061_c1_g1	-3.35706	down	ERF4	ethylene-responsive transcription factor [Momordica charantia]	1.43	0.74	1.37	26.43	22.58	14.35	1.18	21.12
GO:0006952	defense response	biological_process	5	0	TRINITY_DN46138_c0_g1	-1.64677	down	-	hypothetical protein JCGZ_11251 [Jatropha curcas]	3.91	5.45	4.56	24.81	24.97	24.36	4.64	24.71
GO:0006952	defense response	biological_process	5	0	TRINITY_DN46145_c1_g1	9.26527	up	TAO1	unknown [Picea sitchensis]	0.71	1.32	1.78	0	0	0	1.27	0
GO:0006952	defense response	biological_process	5	0	TRINITY_DN46196_c0_g1	-1.74015	down	CSA1	hypothetical protein DCAR_005190 [Daucus carota subsp. sativus]	3.32	7.28	7.1	30.04	31.27	24.8	5.9	28.7
GO:0006952	defense response	biological_process	5	0	TRINITY_DN46222_c4_g2	-5.22652	down	At4g33300	putative CC-NBS-LRR protein, partial [Pinus monticola]	0	0.2	0.05	5.84	3.8	2.97	0.08	4.2
GO:0006952	defense response	biological_process	5	0	TRINITY_DN46267_c2_g2	-3.54725	down	RRS1	NBS/LRR, partial [Pinus taeda]	0.9	2.08	0.13	22.33	20.12	21.13	1.04	21.19
GO:0006952	defense response	biological_process	5	0	TRINITY_DN46267_c2_g7	-2.01324	down	SNC1	NBS/LRR, partial [Pinus taeda]	0.55	0.82	1.36	7.68	5.57	7.26	0.91	6.84
GO:0006952	defense response	biological_process	5	0	TRINITY_DN46273_c2_g1	-1.9727	down	RPP1	predicted protein [Physcomitrella patens]	1.11	1.8	1.83	10.4	10.46	9.73	1.58	10.2
GO:0006952	defense response	biological_process	5	0	TRINITY_DN46342_c1_g4	-1.24576	down	TAO1	unknown [Picea sitchensis]	1.83	3.61	2.76	11.75	10.82	8.41	2.73	10.33
GO:0006952	defense response	biological_process	5	0	TRINITY_DN46440_c0_g3	-2.80762	down	At4g33300	unknown [Picea sitchensis]	0.15	0.29	1.04	4.21	8.64	5.82	0.49	6.22
GO:0006952	defense response	biological_process	5	0	TRINITY_DN46481_c0_g1	2.18611	up	TAO1	predicted protein [Physcomitrella patens]	16.53	29.72	24.58	8.66	7.71	5.78	23.61	7.38
GO:0006952	defense response	biological_process	5	0	TRINITY_DN46482_c1_g2	1.99224	up	-	TIR/NBS, partial [Pinus taeda]	1.59	2.85	2.16	0.93	0.84	1.02	2.2	0.93
GO:0006952	defense response	biological_process	5	0	TRINITY_DN46482_c1_g4	-4.99807	down	VICTR	putative TIR/NBS/LRR disease resistance protein, partial [Pinus taeda]	0	0.72	1.23	7.87	4.77	6.04	0.65	6.23
GO:0006952	defense response	biological_process	5	0	TRINITY_DN46482_c1_g7	-1.68159	down	-	putative truncated TIR-NBS-LRR protein [Pinus monticola]	1.21	2.45	2.13	11.62	11.55	8.57	1.93	10.58
GO:0006952	defense response	biological_process	5	0	TRINITY_DN46503_c0_g1	-1.75001	down	RBOHC	respiratory burst oxidase protein 2a [Picea abies]	1.23	5.27	2.16	8.84	10.93	8.88	2.89	9.55
GO:0006952	defense response	biological_process	5	0	TRINITY_DN46515_c0_g1	-1.67177	down	PIRL5	unknown [Picea sitchensis]	0.65	1.32	1.63	8.53	7.94	4.96	1.2	7.14
GO:0006952	defense response	biological_process	5	0	TRINITY_DN46515_c0_g2	-1.94644	down	-	NBS/LRR, partial [Pinus taeda]	5.85	11.39	9.47	40.61	44.69	35.29	8.9	40.2
GO:0006952	defense response	biological_process	5	0	TRINITY_DN46576_c1_g1	-2.76906	down	At1g12280	unknown [Picea sitchensis]	0.23	0.62	1.57	8.61	9.91	11.19	0.81	9.9
GO:0006952	defense response	biological_process	5	0	TRINITY_DN46592_c1_g1	1.955	up	ERF1A	hypothetical protein 2_4066_02, partial [Pinus radiata]	19.3	11.48	8.28	6.68	7.94	4.02	13.02	6.21
GO:0006952	defense response	biological_process	5	0	TRINITY_DN46592_c2_g2	1.42718	up	ERF2	unknown [Picea sitchensis]	16.89	12.82	9.64	8.01	5.42	5.32	13.12	6.25
GO:0006952	defense response	biological_process	5	0	TRINITY_DN46603_c2_g1	-2.65033	down	RPP1	putative truncated TIR-NBS-LRR protein [Pinus monticola]	0.63	1.24	0.55	11.55	9.15	7.55	0.81	9.42
GO:0006952	defense response	biological_process	5	0	TRINITY_DN46604_c1_g1	2.75166	up	CSA1	hypothetical protein EUGRSUZ_B01867 [Eucalyptus grandis]	11.14	18.69	15.06	5.98	4.4	3.16	14.96	4.51
GO:0006952	defense response	biological_process	5	0	TRINITY_DN46632_c0_g3	-1.59757	down	At4g19050	PREDICTED: TMV resistance protein N-like [Eucalyptus grandis]	1.96	3.06	4.55	19.73	16.58	19.02	3.19	18.44
GO:0006952	defense response	biological_process	5	0	TRINITY_DN46637_c0_g1	-1.89222	down	RPP1	predicted protein [Physcomitrella patens]	4.85	9.73	14.83	64.54	65.07	54.41	9.8	61.34
GO:0006952	defense response	biological_process	5	0	TRINITY_DN46768_c0_g4	4.7172	up	TAO1	hypothetical protein AXG93_2912s1330 [Marchantia polymorpha subsp. polymorpha]	24.31	19.2	12.39	2.16	1.5	0.99	18.63	1.55
GO:0006952	defense response	biological_process	5	0	TRINITY_DN46908_c1_g1	6.37148	up	-	hypothetical protein, partial [Cryptomeria japonica]	2.38	3.74	1.07	0	0	0.13	2.4	0.04
GO:0006952	defense response	biological_process	5	0	TRINITY_DN46908_c2_g2	5.87977	up	RLP12	hypothetical protein MANES_10G092900 [Manihot esculenta]	1.45	2.65	0.81	0.06	0	0.06	1.64	0.04
GO:0006952	defense response	biological_process	5	0	TRINITY_DN46910_c2_g3	-1.86685	down	scrib	PREDICTED: leucine-rich repeat protein soc-2 homolog [Eucalyptus grandis]	1.49	2.36	3.31	12.09	11.63	10.34	2.39	11.35
GO:0006952	defense response	biological_process	5	0	TRINITY_DN46918_c1_g1	-1.46719	down	CSA1	putative TIR-NBS-LRR protein [Pinus monticola]	1.6	2.52	1.76	8.3	7.94	7.54	1.96	7.93
GO:0006952	defense response	biological_process	5	0	TRINITY_DN46918_c1_g2	1.41249	up	RPS6	unknown [Picea sitchensis]	3.68	3.42	1.74	1.85	2.08	1.96	2.95	1.96
GO:0006952	defense response	biological_process	5	0	TRINITY_DN46923_c1_g1	-3.36563	down	v1g189306	PREDICTED: TMV resistance protein N [Eucalyptus grandis]	0.14	0.66	0.84	10.73	10.66	9.36	0.55	10.25
GO:0006952	defense response	biological_process	5	0	TRINITY_DN46975_c0_g1	1.94594	up	scrib	predicted protein [Physcomitrella patens]	37.52	22.15	20.97	11.45	8.25	13.15	26.88	10.95
GO:0006952	defense response	biological_process	5	0	TRINITY_DN47020_c0_g2	-7.77358	down	At5g66910	PREDICTED: TMV resistance protein N-like [Daucus carota subsp. sativus]	0.02	0.11	0.01	13.23	10.54	11.18	0.05	11.65
GO:0006952	defense response	biological_process	5	0	TRINITY_DN47039_c1_g1	-8.66506	down	TAO1	hypothetical protein AMTR_s00056p00215980 [Amborella trichopoda]	0	0	0	4.33	2.73	3.44	0	3.5
GO:0006952	defense response	biological_process	5	0	TRINITY_DN47059_c1_g2	-3.57569	down	At5g01750	unknown [Picea sitchensis]	10.7	18.32	1.96	179.52	207.12	247.3	10.33	211.31
GO:0006952	defense response	biological_process	5	0	TRINITY_DN47072_c0_g2	2.66097	up	XA21	PREDICTED: leucine-rich repeat receptor protein kinase EMS1-like [Glycine max]	2	11.42	13.39	3.58	2.09	1.59	8.94	2.42
GO:0006952	defense response	biological_process	5	0	TRINITY_DN47072_c0_g8	-5.89505	down	At1g34110	PREDICTED: LRR receptor-like serine/threonine-protein kinase FLS2 [Gossypium raimondii]	0	0	0.03	1.7	1.89	0.59	0.01	1.39
GO:0006952	defense response	biological_process	5	0	TRINITY_DN47076_c1_g1	-1.30237	down	PSKR1	unknown [Picea sitchensis]	0.62	2.28	0.91	4.65	5.53	5.62	1.27	5.27
GO:0006952	defense response	biological_process	5	0	TRINITY_DN47085_c1_g1	-1.09648	down	Sur-8	unknown [Picea sitchensis]	2.32	6.39	5.06	24.98	17.04	14.87	4.59	18.96
GO:0006952	defense response	biological_process	5	0	TRINITY_DN47101_c1_g4	-1.98878	down	RPP1	predicted protein [Physcomitrella patens]	1.22	3.08	1.69	3.63	3.18	4.03	2	3.61
GO:0006952	defense response	biological_process	5	0	TRINITY_DN47118_c1_g2	-1.30626	down	EDS1	unknown [Picea sitchensis]	44.55	81.22	68.41	228.92	263.47	242.9	64.73	245.1
GO:0006952	defense response	biological_process	5	0	TRINITY_DN47123_c1_g1	4.88491	up	CSA1	PREDICTED: TMV resistance protein N [Vitis vinifera]	12.75	12.5	9.33	0.37	0.25	0.59	11.53	0.4
GO:0006952	defense response	biological_process	5	0	TRINITY_DN47154_c1_g4	-1.44826	down	SAG101	unknown [Picea sitchensis]	5.49	7.12	9.03	53.44	57.14	42.94	7.21	51.17
GO:0006952	defense response	biological_process	5	0	TRINITY_DN47187_c1_g1	2.48231	up	-	hypothetical protein TSUD_217860 [Trifolium subterraneum]	4.77	1.76	0.19	1.94	1.41	1.74	2.24	1.7
GO:0006952	defense response	biological_process	5	0	TRINITY_DN47194_c2_g1	-1.33185	down	TAO1	unknown [Picea sitchensis]	3.62	5.06	5.98	24.6	21.54	24.45	4.89	23.53
GO:0006952	defense response	biological_process	5	0	TRINITY_DN47194_c2_g3	-1.84536	down	RRS1	putative NBS-LRR protein G8029, partial [Pinus monticola]	1.18	2.84	2.89	14.86	16.31	12.85	2.3	14.67
GO:0006952	defense response	biological_process	5	0	TRINITY_DN47200_c3_g1	-1.46067	down	At5g45510	PREDICTED: putative disease resistance protein RGA3 [Nelumbo nucifera]	2.17	3.36	4.49	11.85	16.41	9.78	3.34	12.68
GO:0006952	defense response	biological_process	5	0	TRINITY_DN47200_c3_g2	3.037	up	At4g19050	PREDICTED: putative disease resistance protein RGA3 [Malus domestica]	0.74	1.46	1.46	0.37	0.19	0.18	1.22	0.25
GO:0006952	defense response	biological_process	5	0	TRINITY_DN47221_c1_g2	-6.65883	down	At1g12280	PREDICTED: putative disease resistance protein RGA1 [Elaeis guineensis]	0.05	0	0.1	9.82	8.89	9.88	0.05	9.53
GO:0006952	defense response	biological_process	5	0	TRINITY_DN47237_c2_g1	-4.22328	down	-	unknown [Picea sitchensis]	1.2	0.83	0.15	11.11	10.07	10.69	0.73	10.62
GO:0006952	defense response	biological_process	5	0	TRINITY_DN47237_c3_g1	-3.68633	down	-	unknown [Picea sitchensis]	0.75	1.37	0.13	14.55	15.11	15.8	0.75	15.15
GO:0006952	defense response	biological_process	5	0	TRINITY_DN47245_c1_g1	-3.18783	down	TAO1	putative truncated TIR-NBS-LRR protein [Pinus monticola]	0.95	3.55	3.45	46.22	40.47	31.64	2.65	39.44
GO:0006952	defense response	biological_process	5	0	TRINITY_DN47252_c0_g4	-1.45839	down	CRK6	hypothetical protein B456_002G016200 [Gossypium raimondii]	1.49	1.95	1.88	7.28	9.48	8.98	1.77	8.58
GO:0006952	defense response	biological_process	5	0	TRINITY_DN47252_c1_g1	-1.22381	down	PERK12	unknown [Picea sitchensis]	1.16	3.3	2.14	10.48	8.88	10.35	2.2	9.9
GO:0006952	defense response	biological_process	5	0	TRINITY_DN47252_c1_g3	-1.06894	down	CRK32	unknown [Picea sitchensis]	2.22	5.98	5.93	19.7	17.37	16.59	4.71	17.89
GO:0006952	defense response	biological_process	5	0	TRINITY_DN47268_c1_g1	-6.73474	down	RPP8L3	unknown [Picea sitchensis]	2.08	1.79	4.02	19.72	21.16	28.37	2.63	23.08
GO:0006952	defense response	biological_process	5	0	TRINITY_DN47272_c4_g1	1.75788	up	At4g11170	leucine-rich repeat-containing protein, putative [Ricinus communis]	11.88	10.16	8.49	5.49	2.32	3.68	10.18	3.83
GO:0006952	defense response	biological_process	5	0	TRINITY_DN47272_c4_g3	5.32005	up	RLM1A	PREDICTED: TMV resistance protein N-like isoform X1 [Solanum tuberosum]	2.62	2.81	1.68	0.15	0.17	0	2.37	0.11
GO:0006952	defense response	biological_process	5	0	TRINITY_DN47284_c0_g1	-1.28222	down	RLP30	PREDICTED: LRR receptor-like serine/threonine-protein kinase GSO1 isoform X1 [Cicer arietinum]	1.64	4.93	3.54	11.79	10.9	13.51	3.37	12.07
GO:0006952	defense response	biological_process	5	0	TRINITY_DN47289_c1_g1	-1.07833	down	-	putative NBS-LRR protein G8029, partial [Pinus monticola]	1.18	1.71	1.94	5	6.51	5.54	1.61	5.68
GO:0006952	defense response	biological_process	5	0	TRINITY_DN47289_c2_g2	-1.13563	down	At5g47280	putative truncated TIR-NBS-LRR protein [Pinus monticola]	2.48	6.16	3.96	15.85	15.95	14.32	4.2	15.37
GO:0006952	defense response	biological_process	5	0	TRINITY_DN47294_c2_g2	-5.77356	down	At5g43730	PREDICTED: probable disease resistance protein At4g27220, partial [Solanum tuberosum]	0	0.46	0.43	34.06	21.23	39.66	0.3	31.65
GO:0006952	defense response	biological_process	5	0	TRINITY_DN47300_c1_g2	-1.23128	down	At1g63350	NBS/LRR, partial [Pinus taeda]	4.07	7.47	6.59	22.15	22.96	22.09	6.04	22.4
GO:0006952	defense response	biological_process	5	0	TRINITY_DN47301_c1_g1	2.01574	up	TAO1	predicted protein [Physcomitrella patens]	5.33	9.26	9.05	3.11	3.99	5.24	7.88	4.11
GO:0006952	defense response	biological_process	5	0	TRINITY_DN47307_c2_g1	-1.41857	down	RPP1	unknown [Picea sitchensis]	2.09	6.14	6.17	26.13	24.44	31.82	4.8	27.46
GO:0006952	defense response	biological_process	5	0	TRINITY_DN47318_c0_g1	-2.11524	down	CSA1	PREDICTED: disease resistance protein TAO1-like isoform X2 [Eucalyptus grandis]	0.13	0.19	0.33	1.14	1.64	4.9	0.22	2.56
GO:0006952	defense response	biological_process	5	0	TRINITY_DN47318_c3_g2	1.25831	up	IRL3	PREDICTED: TMV resistance protein N [Amborella trichopoda]	3.52	6	7.48	5.16	4.62	3.88	5.67	4.55
GO:0006952	defense response	biological_process	5	0	TRINITY_DN47325_c4_g1	-1.33595	down	RPS4	putative truncated TIR-NBS-LRR protein [Pinus monticola]	7.06	12.99	9.29	42.15	50.68	43.53	9.78	45.45
GO:0006952	defense response	biological_process	5	0	TRINITY_DN49216_c0_g1	4.71812	up	CYS3	PREDICTED: multicystatin-like [Vigna angularis]	2.23	2.43	2.95	0.16	0.2	0.14	2.54	0.17
GO:0006952	defense response	biological_process	5	0	TRINITY_DN4954_c0_g1	-2.43185	down	At1g73050	PREDICTED: (R)-mandelonitrile lyase-like [Vitis vinifera]	0.09	0.22	0.23	1.25	1.91	1.76	0.18	1.64
GO:0043531	ADP binding	molecular_function	9	0	TRINITY_DN33283_c0_g4	2.12282	up	TIR	predicted protein [Physcomitrella patens]	0.96	1.76	1.88	0.65	0.71	0.41	1.53	0.59
GO:0043531	ADP binding	molecular_function	9	0	TRINITY_DN33487_c0_g1	-2.36979	down	ADR1	putative disease resistance protein [Ananas comosus]	0.94	1.54	1.3	10.99	12.2	10.64	1.26	11.28
GO:0043531	ADP binding	molecular_function	9	0	TRINITY_DN33902_c1_g3	-3.11704	down	-	unknown [Picea sitchensis]	0.14	0.12	0.11	2.37	1.43	1.09	0.12	1.63
GO:0043531	ADP binding	molecular_function	9	0	TRINITY_DN34281_c0_g1	1.28176	up	LAZ5	NBS/LRR, partial [Pinus taeda]	2.72	2.61	1.11	1.63	1.47	1.59	2.15	1.56
GO:0043531	ADP binding	molecular_function	9	0	TRINITY_DN34560_c0_g1	-2.33275	down	At5g66910	hypothetical protein ZOSMA_87G00870 [Zostera marina]	0	0.04	0.25	0.89	0.74	0.81	0.1	0.81
GO:0043531	ADP binding	molecular_function	9	0	TRINITY_DN34560_c0_g3	-4.36911	down	TAO1	predicted protein [Physcomitrella patens]	0.04	0.22	0.42	8.51	7.06	7.94	0.23	7.84
GO:0043531	ADP binding	molecular_function	9	0	TRINITY_DN34560_c0_g4	-8.46596	down	TAO1	hypothetical protein POPTR_0004s08710g [Populus trichocarpa]	0	0	0.02	14.87	11.22	15.23	0.01	13.77
GO:0043531	ADP binding	molecular_function	9	0	TRINITY_DN34593_c0_g1	-4.00244	down	RGA2	unknown [Picea sitchensis]	0.1	0.81	0.09	8.93	9.15	9.66	0.33	9.25
GO:0043531	ADP binding	molecular_function	9	0	TRINITY_DN34738_c5_g1	2.27972	up	TAO1	disease resistance protein (TIR-NBS-LRR class) [Arabidopsis thaliana]	0.58	0.69	1.22	0.38	0.15	0.34	0.83	0.29
GO:0043531	ADP binding	molecular_function	9	0	TRINITY_DN35905_c0_g1	-3.90791	down	RPS5	NBS-LRR type disease resistance protein [Medicago truncatula]	0.14	1.84	3.49	46.97	38.02	53.41	1.82	46.13
GO:0043531	ADP binding	molecular_function	9	0	TRINITY_DN36069_c0_g1	-8.76922	down	-	PREDICTED: TMV resistance protein N-like [Arachis ipaensis]	0	0	0	9.16	5.72	5.15	0	6.68
GO:0043531	ADP binding	molecular_function	9	0	TRINITY_DN36203_c0_g2	-6.89956	down	TAO1	unknown [Picea sitchensis]	0.01	0.04	0.02	5.04	4.22	4.83	0.02	4.7
GO:0043531	ADP binding	molecular_function	9	0	TRINITY_DN36263_c0_g1	-3.77086	down	WRKY16	NBS/LRR, partial [Pinus taeda]	0	0.52	0.03	5.37	7.26	6.04	0.18	6.22
GO:0043531	ADP binding	molecular_function	9	0	TRINITY_DN36482_c1_g4	-3.13009	down	At4g33300	CC-NBS-LRR resistance-like protein [Pinus lambertiana]	2.46	6.24	8.73	85.82	82.46	84.44	5.81	84.24
GO:0043531	ADP binding	molecular_function	9	0	TRINITY_DN37356_c0_g1	-6.29029	down	At1g58400	PREDICTED: putative disease resistance protein RGA3 isoform X1 [Vigna angularis]	0	0.06	0	2.35	2.88	2.1	0.02	2.44
GO:0043531	ADP binding	molecular_function	9	0	TRINITY_DN37356_c0_g2	-5.02202	down	RPS5	PREDICTED: LOW QUALITY PROTEIN: disease resistance RPP13-like protein 4 [Capsicum annuum]	0.15	0.08	1.31	7.76	4.74	8.16	0.51	6.89
GO:0043531	ADP binding	molecular_function	9	0	TRINITY_DN37356_c0_g3	-8.3855	down	RPPL1	TPA: hypothetical protein ZEAMMB73_852544 [Zea mays]	0	0	0	7.38	4.23	7.17	0	6.26
GO:0043531	ADP binding	molecular_function	9	0	TRINITY_DN37948_c3_g3	-1.53856	down	LRRD1	unknown [Picea sitchensis]	1.98	3.29	1.77	11.41	9.49	12.89	2.35	11.26
GO:0043531	ADP binding	molecular_function	9	0	TRINITY_DN37948_c3_g4	5.27872	up	RPP1	unknown [Picea sitchensis]	3.42	4.87	10.94	0.72	0.05	0.04	6.41	0.27
GO:0043531	ADP binding	molecular_function	9	0	TRINITY_DN38222_c0_g2	-3.90476	down	-	unknown [Picea sitchensis]	0.14	0.12	0.06	2.7	2.09	1.21	0.11	2
GO:0043531	ADP binding	molecular_function	9	0	TRINITY_DN38222_c0_g4	1.05148	up	WRKY19	NB-ARC [Pinus tabuliformis]	0.88	0.89	0.95	0.64	0.82	0.79	0.91	0.75
GO:0043531	ADP binding	molecular_function	9	0	TRINITY_DN38333_c3_g1	2.16973	up	-	PREDICTED: TMV resistance protein N [Amborella trichopoda]	0.73	1.23	1.39	0.57	0.32	0.37	1.12	0.42
GO:0043531	ADP binding	molecular_function	9	0	TRINITY_DN38466_c2_g2	-1.84156	down	RPP1	unknown [Picea sitchensis]	5.92	11.53	6.72	39.58	50.62	44.7	8.06	44.97
GO:0043531	ADP binding	molecular_function	9	0	TRINITY_DN38632_c0_g1	-6.83262	down	-	TIR/NBS, partial [Pinus taeda]	0.19	0.12	1.77	147.37	127.24	94	0.69	122.87
GO:0043531	ADP binding	molecular_function	9	0	TRINITY_DN38632_c0_g3	1.6	up	At4g11170	unknown [Picea sitchensis]	1.74	2.49	2.7	1.56	1.32	1.01	2.31	1.3
GO:0043531	ADP binding	molecular_function	9	0	TRINITY_DN38888_c0_g1	-1.77	down	At4g19050	PREDICTED: TMV resistance protein N-like [Eucalyptus grandis]	11.12	21.64	12.28	118.92	90.16	107.36	15.01	105.48
GO:0043531	ADP binding	molecular_function	9	0	TRINITY_DN18680_c0_g2	-6.30013	down	RPM1	unknown [Picea sitchensis]	0.01	0	0.06	3.16	3.13	3.66	0.02	3.32
GO:0043531	ADP binding	molecular_function	9	0	TRINITY_DN25796_c0_g1	-3.83384	down	RCA2	PREDICTED: ribulose bisphosphate carboxylase/oxygenase activase, chloroplastic [Cucumis sativus]	0.02	0.16	0.02	1.64	1.99	1.26	0.07	1.63
GO:0043531	ADP binding	molecular_function	9	0	TRINITY_DN26300_c0_g1	-4.03798	down	TAO1	predicted protein [Physcomitrella patens]	0.01	0.06	0.06	1.48	1.1	1.05	0.04	1.21
GO:0043531	ADP binding	molecular_function	9	0	TRINITY_DN28449_c0_g2	-8.52752	down	TAO1	predicted protein [Physcomitrella patens]	0	0.01	0	2.25	1.95	1.81	0	2
GO:0043531	ADP binding	molecular_function	9	0	TRINITY_DN29390_c0_g3	6.12179	up	TAO1	predicted protein [Physcomitrella patens]	0.88	1.57	1.39	0.03	0.02	0.04	1.28	0.03
GO:0043531	ADP binding	molecular_function	9	0	TRINITY_DN30462_c0_g1	-8.74558	down	At5g66910	hypothetical protein POPTR_0005s03260g [Populus trichocarpa]	0	0.09	0	27.85	26.68	27.35	0.03	27.29
GO:0043531	ADP binding	molecular_function	9	0	TRINITY_DN31128_c2_g1	-2.14878	down	At5g04720	unknown [Picea sitchensis]	1.39	1.44	1.01	7.64	10.71	10.89	1.28	9.75
GO:0043531	ADP binding	molecular_function	9	0	TRINITY_DN31359_c0_g1	-1.70528	down	RPP8L4	unknown [Picea sitchensis]	0.08	0.27	1.33	3.28	2.74	3.01	0.56	3.01
GO:0043531	ADP binding	molecular_function	9	0	TRINITY_DN31360_c0_g1	-2.75214	down	lrrcc1	PREDICTED: TMV resistance protein N-like [Eucalyptus grandis]	0.22	0.68	0.66	5.43	6.81	5.5	0.52	5.91
GO:0043531	ADP binding	molecular_function	9	0	TRINITY_DN31360_c0_g2	-2.62972	down	At4g19050	unknown [Picea sitchensis]	0.2	0.57	0.98	5.8	6.5	5.83	0.58	6.04
GO:0043531	ADP binding	molecular_function	9	0	TRINITY_DN31527_c0_g2	-1.91034	down	At5g47250	hypothetical protein CISIN_1g047642mg, partial [Citrus sinensis]	0.37	2.07	2.62	8.74	10.85	11.67	1.69	10.42
GO:0043531	ADP binding	molecular_function	9	0	TRINITY_DN31867_c0_g1	-2.81232	down	RPS2	unknown [Picea sitchensis]	0.34	0.78	2.49	15.05	12.85	19.81	1.2	15.9
GO:0043531	ADP binding	molecular_function	9	0	TRINITY_DN32516_c0_g3	2.9411	up	-	PREDICTED: TMV resistance protein N-like [Juglans regia]	0.63	0.62	0.88	0.27	0.07	0.13	0.71	0.16
GO:0043531	ADP binding	molecular_function	9	0	TRINITY_DN32770_c1_g6	-4.54809	down	-	putative TIR-NBS-LRR protein [Pinus monticola]	0.02	0.08	0.01	1.25	1.75	1.49	0.04	1.5
GO:0043531	ADP binding	molecular_function	9	0	TRINITY_DN32808_c0_g1	-1.14741	down	lrrc57	unknown [Picea sitchensis]	1.56	1.02	0.43	3.78	3.57	2.65	1	3.33
GO:0043531	ADP binding	molecular_function	9	0	TRINITY_DN39180_c0_g2	-5.62013	down	At1g59780	PREDICTED: probable disease resistance RPP8-like protein 2 [Tarenaya hassleriana]	0.07	0.05	0.04	6.87	4.08	7	0.05	5.98
GO:0043531	ADP binding	molecular_function	9	0	TRINITY_DN39277_c1_g1	-1.12927	down	-	unknown [Picea sitchensis]	7.49	22.1	15.59	64.49	51.72	48.15	15.06	54.79
GO:0043531	ADP binding	molecular_function	9	0	TRINITY_DN39330_c0_g3	-1.14616	down	At4g14610	PREDICTED: putative disease resistance protein RGA3 isoform X1 [Elaeis guineensis]	3.23	6.37	6.6	23.35	21.13	30.24	5.4	24.91
GO:0043531	ADP binding	molecular_function	9	0	TRINITY_DN39813_c3_g1	-8.41379	down	TAO1	unknown [Picea sitchensis]	0	0	0.01	2.91	3.01	2.69	0	2.87
GO:0043531	ADP binding	molecular_function	9	0	TRINITY_DN39923_c2_g3	-7.35758	down	ESAG8	PREDICTED: TMV resistance protein N-like [Eucalyptus grandis]	0.05	0.9	1.34	25.05	19.86	18.75	0.76	21.22
GO:0043531	ADP binding	molecular_function	9	0	TRINITY_DN40126_c0_g2	1.54046	up	WRKY19	BnaA09g29610D [Brassica napus]	1.76	1.74	0.95	1.4	1.5	1.26	1.48	1.39
GO:0043531	ADP binding	molecular_function	9	0	TRINITY_DN40300_c0_g5	-3.45527	down	RPP4	NBS/LRR, partial [Pinus taeda]	0.43	0.58	0.3	9.36	8.37	7.26	0.44	8.33
GO:0043531	ADP binding	molecular_function	9	0	TRINITY_DN40401_c1_g1	2.21708	up	TAO1	hypothetical protein POPTR_0005s03260g [Populus trichocarpa]	0.75	0.95	1.99	0.64	0.37	0.33	1.23	0.45
GO:0043531	ADP binding	molecular_function	9	0	TRINITY_DN40408_c1_g1	-1.28549	down	TAO1	unknown [Picea sitchensis]	1.57	4.6	4.2	27.27	22.89	25.14	3.46	25.1
GO:0043531	ADP binding	molecular_function	9	0	TRINITY_DN41013_c2_g1	-1.39017	down	RPP1	unknown [Picea sitchensis]	3.67	4.63	9.61	24.79	26.7	25.11	5.97	25.53
GO:0043531	ADP binding	molecular_function	9	0	TRINITY_DN41080_c0_g2	-3.57539	down	RCA	ribulose-1,5-bisphosphate carboxylase/oxygenase activase large isoform [Pinus massoniana]	14.13	45.66	19.82	379.54	531.64	650.14	26.54	520.44
GO:0043531	ADP binding	molecular_function	9	0	TRINITY_DN41274_c0_g1	-7.64998	down	-	PREDICTED: TMV resistance protein N-like [Nelumbo nucifera]	0	0	0.02	2.93	1.92	2.27	0.01	2.37
GO:0043531	ADP binding	molecular_function	9	0	TRINITY_DN41274_c0_g5	-8.29819	down	TAO1	PREDICTED: TMV resistance protein N-like [Nelumbo nucifera]	0	0	0	1.3	1.49	1.15	0	1.31
GO:0043531	ADP binding	molecular_function	9	0	TRINITY_DN41277_c0_g1	-3.21689	down	WRKY19	predicted protein [Physcomitrella patens]	1.08	3.14	0.13	22.62	18.41	23.41	1.45	21.48
GO:0043531	ADP binding	molecular_function	9	0	TRINITY_DN41437_c3_g1	5.35033	up	-	hypothetical protein POPTR_0005s030202g, partial [Populus trichocarpa]	1.88	3.4	7.58	0.46	0.03	0.02	4.29	0.17
GO:0043531	ADP binding	molecular_function	9	0	TRINITY_DN41569_c1_g2	-3.85374	down	RPP13L4	unknown [Picea sitchensis]	0.03	0.07	0.06	1.23	1.52	1.28	0.05	1.34
GO:0043531	ADP binding	molecular_function	9	0	TRINITY_DN41696_c0_g2	-1.0302	down	-	putative rp3 protein [Zea mays]	1.03	1.77	0.94	3.75	4.95	4.42	1.25	4.37
GO:0043531	ADP binding	molecular_function	9	0	TRINITY_DN41724_c0_g4	-9.82805	down	At5g04720	unknown [Picea sitchensis]	0	0	0	1.46	1.42	1.4	0	1.43
GO:0043531	ADP binding	molecular_function	9	0	TRINITY_DN41747_c0_g2	5.04871	up	TAO1	PREDICTED: disease resistance protein TAO1-like [Ipomoea nil]	1	3.1	1.43	0.19	0.02	0.06	1.84	0.09
GO:0043531	ADP binding	molecular_function	9	0	TRINITY_DN41767_c0_g1	-1.26481	down	RPP1	predicted protein [Physcomitrella patens]	4.81	13.56	7.58	20.17	31.26	29.97	8.65	27.13
GO:0043531	ADP binding	molecular_function	9	0	TRINITY_DN41767_c0_g2	2.17026	up	TAO1	hypothetical protein EUGRSUZ_B01867 [Eucalyptus grandis]	2.5	7.19	7.5	4.12	3.91	1.62	5.73	3.22
GO:0043531	ADP binding	molecular_function	9	0	TRINITY_DN41950_c1_g2	-5.28895	down	TAO1	unknown [Picea sitchensis]	0.1	0.91	0.17	23.42	21.27	29.93	0.39	24.87
GO:0043531	ADP binding	molecular_function	9	0	TRINITY_DN41950_c1_g3	-5.31987	down	-	PREDICTED: uncharacterized protein LOC104445431 [Eucalyptus grandis]	0.02	0.64	0.08	17.42	15.93	22.43	0.25	18.59
GO:0043531	ADP binding	molecular_function	9	0	TRINITY_DN41953_c0_g3	-8.55472	down	TAO1	predicted protein [Physcomitrella patens]	0	0.03	0	8.06	4.88	6.7	0.01	6.55
GO:0043531	ADP binding	molecular_function	9	0	TRINITY_DN42028_c0_g1	-1.02162	down	TAO1	predicted protein [Physcomitrella patens]	2.03	4.4	2.48	8.46	7.48	8.03	2.97	7.99
GO:0043531	ADP binding	molecular_function	9	0	TRINITY_DN42148_c0_g2	-2.48961	down	CSA1	hypothetical protein EUGRSUZ_B01950 [Eucalyptus grandis]	0.36	0.5	0	2.34	2.53	2.24	0.29	2.37
GO:0043531	ADP binding	molecular_function	9	0	TRINITY_DN42148_c0_g3	-1.13733	down	RGA1	predicted protein [Physcomitrella patens]	2.73	12.01	7.7	26.36	18.66	21.8	7.48	22.27
GO:0043531	ADP binding	molecular_function	9	0	TRINITY_DN42343_c0_g1	-1.80077	down	-	putative TIR/NBS/LRR disease resistance protein, partial [Pinus taeda]	1.41	3	2.63	13.33	14.17	14.79	2.35	14.1
GO:0043531	ADP binding	molecular_function	9	0	TRINITY_DN42351_c1_g3	2.05917	up	-	PREDICTED: TMV resistance protein N-like isoform X1 [Solanum tuberosum]	6.06	5.04	3.11	2.63	1.63	1.59	4.74	1.95
GO:0043531	ADP binding	molecular_function	9	0	TRINITY_DN42351_c1_g6	3.57345	up	RLM1A	hypothetical protein EUTSA_v10023218mg [Eutrema salsugineum]	1.77	2.54	1.39	0.24	0.3	0.28	1.9	0.27
GO:0043531	ADP binding	molecular_function	9	0	TRINITY_DN42747_c0_g2	-2.38649	down	CSA1	Protein popC [Aegilops tauschii]	0.48	1.2	0.02	13.42	13.95	15.1	0.57	14.16
GO:0043531	ADP binding	molecular_function	9	0	TRINITY_DN42815_c0_g1	-6.74756	down	-	putative TIR-NBS-LRR protein [Pinus monticola]	0.01	1.78	0.99	25.32	23.11	22.79	0.93	23.74
GO:0043531	ADP binding	molecular_function	9	0	TRINITY_DN42851_c0_g1	-1.42627	down	At1g63350	PREDICTED: TMV resistance protein N-like [Eucalyptus grandis]	0.37	0.53	0.8	2.54	2.56	2.66	0.57	2.59
GO:0043531	ADP binding	molecular_function	9	0	TRINITY_DN42904_c0_g4	-3.97479	down	-	unknown [Picea sitchensis]	0.12	0	0.02	1.11	1.04	2.14	0.05	1.43
GO:0043531	ADP binding	molecular_function	9	0	TRINITY_DN42930_c0_g6	-1.17838	down	DDB_G0278509	hypothetical protein EUGRSUZ_K01432 [Eucalyptus grandis]	1.22	2.85	2.39	8.23	7.96	6.59	2.15	7.59
GO:0043531	ADP binding	molecular_function	9	0	TRINITY_DN42975_c1_g1	-1.19221	down	TAO1	NBS-LRR disease resistance protein homologue [Hordeum vulgare]	2.27	3.45	4.97	13.75	13.59	12.91	3.56	13.42
GO:0043531	ADP binding	molecular_function	9	0	TRINITY_DN43012_c0_g2	-1.03194	down	RPP1	PREDICTED: TMV resistance protein N [Amborella trichopoda]	0.89	1.9	1.1	4.05	3.88	4.82	1.3	4.25
GO:0043531	ADP binding	molecular_function	9	0	TRINITY_DN43157_c0_g1	-1.05312	down	RPP1	hypothetical protein AALP_AA1G281200 [Arabis alpina]	2.61	4.59	4.01	13.35	12.24	13.88	3.74	13.16
GO:0043531	ADP binding	molecular_function	9	0	TRINITY_DN43171_c0_g2	-1.42731	down	LAZ5	unknown [Picea sitchensis]	0.69	1.21	1.17	3.58	4.88	3.16	1.02	3.87
GO:0043531	ADP binding	molecular_function	9	0	TRINITY_DN43475_c0_g2	-1.8254	down	ADR1	putative TIR-NBS-LRR protein [Pinus monticola]	0.06	0.18	0.77	1.62	2.31	1.37	0.34	1.77
GO:0043531	ADP binding	molecular_function	9	0	TRINITY_DN43546_c0_g1	-9.56219	down	popC	predicted protein [Physcomitrella patens]	0	0.01	0.03	19.31	15.51	22.09	0.01	18.97
GO:0043531	ADP binding	molecular_function	9	0	TRINITY_DN43547_c0_g1	-1.51556	down	RPP1	putative TIR/NBS/LRR disease resistance protein, partial [Pinus taeda]	4.62	6.67	5.47	23.27	24.1	15.05	5.59	20.81
GO:0043531	ADP binding	molecular_function	9	0	TRINITY_DN43671_c0_g1	-2.68442	down	RF45	PREDICTED: disease resistance protein RPM1-like isoform X1 [Ipomoea nil]	0.12	0.32	0.38	3.91	3.44	3.3	0.27	3.55
GO:0043531	ADP binding	molecular_function	9	0	TRINITY_DN43672_c0_g1	-3.85029	down	RXW24L	PREDICTED: disease resistance protein RPM1-like isoform X1 [Nelumbo nucifera]	0.57	0.73	0.71	9.94	8.59	13.07	0.67	10.53
GO:0043531	ADP binding	molecular_function	9	0	TRINITY_DN43688_c0_g1	-4.94978	down	TAO1	hypothetical protein SORBIDRAFT_08g022995, partial [Sorghum bicolor]	0.07	1.09	0.38	22.38	24.68	28.46	0.51	25.17
GO:0043531	ADP binding	molecular_function	9	0	TRINITY_DN43688_c0_g6	-4.52943	down	popC	PREDICTED: leucine-rich repeat protein soc-2 homolog [Eucalyptus grandis]	0.15	0.89	0.28	14.68	15.32	19.47	0.44	16.49
GO:0043531	ADP binding	molecular_function	9	0	TRINITY_DN44023_c4_g1	-1.61297	down	RGA2	PREDICTED: putative disease resistance protein RGA3 [Gossypium hirsutum]	0.35	0.26	0.36	1.27	1.45	2.17	0.32	1.63
GO:0043531	ADP binding	molecular_function	9	0	TRINITY_DN44061_c0_g3	-1.29138	down	At1g61180	unknown [Picea sitchensis]	2.41	2.62	4.04	15.9	13.53	21.7	3.02	17.04
GO:0043531	ADP binding	molecular_function	9	0	TRINITY_DN44219_c0_g1	-2.01603	down	TAO1	unknown [Picea sitchensis]	4.85	8.29	7.85	53	44.32	42.39	7	46.57
GO:0043531	ADP binding	molecular_function	9	0	TRINITY_DN44243_c5_g1	-1.54333	down	At5g47280	PREDICTED: disease resistance protein RML1A-like [Ipomoea nil]	1.42	2.65	2.2	11.4	12.52	7.4	2.09	10.44
GO:0043531	ADP binding	molecular_function	9	0	TRINITY_DN44306_c0_g1	-1.59221	down	RPPL1	unknown [Picea sitchensis]	1.09	1.79	1.89	12.45	10.38	7.84	1.59	10.22
GO:0043531	ADP binding	molecular_function	9	0	TRINITY_DN44332_c0_g5	-1.71786	down	VICTR	putative TIR/NBS/LRR disease resistance protein, partial [Pinus taeda]	0.08	0.21	0.31	1.26	0.92	1.18	0.2	1.12
GO:0043531	ADP binding	molecular_function	9	0	TRINITY_DN44489_c0_g2	-6.98081	down	TAO1	unknown [Picea sitchensis]	0.02	0.03	0.11	14.56	10.87	16.11	0.05	13.85
GO:0043531	ADP binding	molecular_function	9	0	TRINITY_DN44540_c0_g1	-1.87018	down	At4g33300	unknown [Picea sitchensis]	2.56	4.58	4.5	21.4	32.4	22.41	3.88	25.4
GO:0043531	ADP binding	molecular_function	9	0	TRINITY_DN44604_c0_g1	-1.93131	down	RPP1	hypothetical protein EUGRSUZ_B01950 [Eucalyptus grandis]	2.7	5.86	1.74	29.05	26.31	23.27	3.43	26.21
GO:0043531	ADP binding	molecular_function	9	0	TRINITY_DN45035_c0_g5	-11.1787	down	RPPL1	Nbs-lrr resistance protein, putative isoform 1 [Theobroma cacao]	0	0	0	30.43	27.13	32.76	0	30.11
GO:0043531	ADP binding	molecular_function	9	0	TRINITY_DN45186_c0_g1	-1.83794	down	At4g11170	putative truncated TIR-NBS-LRR protein [Pinus monticola]	1.45	1.14	1.76	8.9	8.28	9.65	1.45	8.94
GO:0043531	ADP binding	molecular_function	9	0	TRINITY_DN45207_c0_g1	-1.47637	down	At4g33300	unknown [Picea sitchensis]	2.21	4.73	3.44	15.34	17.62	15.22	3.46	16.06
GO:0043531	ADP binding	molecular_function	9	0	TRINITY_DN45230_c0_g1	4.56216	up	CSA1	predicted protein [Physcomitrella patens]	15.69	12.42	8.31	0.8	0.56	0.47	12.14	0.61
GO:0043531	ADP binding	molecular_function	9	0	TRINITY_DN45354_c0_g1	-5.2148	down	TAO1	unknown [Picea sitchensis]	0.13	0.07	0.03	2.66	2.96	3.43	0.08	3.02
GO:0043531	ADP binding	molecular_function	9	0	TRINITY_DN45454_c0_g1	-2.02914	down	PIRL9	unknown [Picea sitchensis]	1.98	2.81	5.98	14.65	15.31	13.32	3.59	14.43
GO:0043531	ADP binding	molecular_function	9	0	TRINITY_DN45454_c0_g5	-1.83632	down	CSA1	unknown [Picea sitchensis]	2.3	6.88	6.13	40.8	32.51	30.28	5.1	34.53
GO:0043531	ADP binding	molecular_function	9	0	TRINITY_DN45528_c0_g1	-4.33901	down	RLM1A	unknown [Picea sitchensis]	0.09	0.43	0.08	4.68	4.97	4.33	0.2	4.66
GO:0043531	ADP binding	molecular_function	9	0	TRINITY_DN45599_c0_g1	-2.33035	down	WRKY16	putative TIR-NBS-LRR protein [Pinus monticola]	0.74	1.04	2.49	5.3	4.71	3.58	1.42	4.53
GO:0043531	ADP binding	molecular_function	9	0	TRINITY_DN45611_c1_g1	-8.60243	down	RPP1	unknown [Picea sitchensis]	0.01	0	0.01	3.1	3.42	3.11	0.01	3.21
GO:0043531	ADP binding	molecular_function	9	0	TRINITY_DN45611_c1_g2	-9.87157	down	TAO1	unknown [Picea sitchensis]	0	0	0	3.5	3.44	2.29	0	3.08
GO:0043531	ADP binding	molecular_function	9	0	TRINITY_DN45620_c0_g1	-1.49269	down	RPS5	PREDICTED: probable disease resistance protein RF45 [Amborella trichopoda]	0.05	0.17	0.66	1.03	1.74	1.42	0.29	1.4
GO:0043531	ADP binding	molecular_function	9	0	TRINITY_DN45620_c0_g2	-3.80915	down	RPP13L4	hypothetical protein B456_007G365500 [Gossypium raimondii]	0.01	0.13	0.31	3.17	3.35	3.78	0.15	3.43
GO:0043531	ADP binding	molecular_function	9	0	TRINITY_DN45620_c0_g4	-4.08311	down	RF45	PREDICTED: probable disease resistance protein RF9 [Gossypium raimondii]	0	0.16	0.45	5.46	4.72	6.19	0.2	5.46
GO:0043531	ADP binding	molecular_function	9	0	TRINITY_DN45666_c1_g1	-1.12229	down	VICTR	unknown [Picea sitchensis]	5.35	9.39	8.69	27.71	28.78	24.24	7.81	26.91
GO:0043531	ADP binding	molecular_function	9	0	TRINITY_DN45727_c0_g1	-1.30272	down	TAO1	putative TIR-NBS-LRR protein [Pinus monticola]	1.55	3.85	2.66	15.04	11.21	11.11	2.69	12.45
GO:0043531	ADP binding	molecular_function	9	0	TRINITY_DN45791_c0_g2	-2.37962	down	At4g33300	putative protein [Arabidopsis thaliana]	1.42	1.74	1.67	11.46	12.47	11.92	1.61	11.95
GO:0043531	ADP binding	molecular_function	9	0	TRINITY_DN45805_c0_g1	1.13982	up	At1g12290	PREDICTED: uncharacterized protein LOC18432675 [Amborella trichopoda]	3.14	4.7	3.68	5.32	3	2.74	3.84	3.69
GO:0043531	ADP binding	molecular_function	9	0	TRINITY_DN45938_c0_g1	-2.95393	down	RRS1	putative truncated TIR-NBS-LRR protein [Pinus monticola]	0.69	1.71	2.55	36.18	23.73	34.3	1.65	31.4
GO:0043531	ADP binding	molecular_function	9	0	TRINITY_DN45986_c2_g1	-2.11503	down	TAO1	PREDICTED: TMV resistance protein N-like [Eucalyptus grandis]	0.41	1.22	1.57	8.9	7.04	8.22	1.07	8.05
GO:0043531	ADP binding	molecular_function	9	0	TRINITY_DN45986_c2_g2	-7.98331	down	RGA1	PREDICTED: disease resistance protein TAO1-like isoform X2 [Eucalyptus grandis]	0	0	0.01	1.65	1.16	1.15	0	1.32
GO:0043531	ADP binding	molecular_function	9	0	TRINITY_DN46138_c0_g1	-1.64677	down	-	hypothetical protein JCGZ_11251 [Jatropha curcas]	3.91	5.45	4.56	24.81	24.97	24.36	4.64	24.71
GO:0043531	ADP binding	molecular_function	9	0	TRINITY_DN46145_c1_g1	9.26527	up	TAO1	unknown [Picea sitchensis]	0.71	1.32	1.78	0	0	0	1.27	0
GO:0043531	ADP binding	molecular_function	9	0	TRINITY_DN46196_c0_g1	-1.74015	down	CSA1	hypothetical protein DCAR_005190 [Daucus carota subsp. sativus]	3.32	7.28	7.1	30.04	31.27	24.8	5.9	28.7
GO:0043531	ADP binding	molecular_function	9	0	TRINITY_DN46222_c4_g2	-5.22652	down	At4g33300	putative CC-NBS-LRR protein, partial [Pinus monticola]	0	0.2	0.05	5.84	3.8	2.97	0.08	4.2
GO:0043531	ADP binding	molecular_function	9	0	TRINITY_DN46267_c2_g2	-3.54725	down	RRS1	NBS/LRR, partial [Pinus taeda]	0.9	2.08	0.13	22.33	20.12	21.13	1.04	21.19
GO:0043531	ADP binding	molecular_function	9	0	TRINITY_DN46267_c2_g7	-2.01324	down	SNC1	NBS/LRR, partial [Pinus taeda]	0.55	0.82	1.36	7.68	5.57	7.26	0.91	6.84
GO:0043531	ADP binding	molecular_function	9	0	TRINITY_DN46273_c2_g1	-1.9727	down	RPP1	predicted protein [Physcomitrella patens]	1.11	1.8	1.83	10.4	10.46	9.73	1.58	10.2
GO:0043531	ADP binding	molecular_function	9	0	TRINITY_DN46342_c1_g4	-1.24576	down	TAO1	unknown [Picea sitchensis]	1.83	3.61	2.76	11.75	10.82	8.41	2.73	10.33
GO:0043531	ADP binding	molecular_function	9	0	TRINITY_DN46440_c0_g3	-2.80762	down	At4g33300	unknown [Picea sitchensis]	0.15	0.29	1.04	4.21	8.64	5.82	0.49	6.22
GO:0043531	ADP binding	molecular_function	9	0	TRINITY_DN46481_c0_g1	2.18611	up	TAO1	predicted protein [Physcomitrella patens]	16.53	29.72	24.58	8.66	7.71	5.78	23.61	7.38
GO:0043531	ADP binding	molecular_function	9	0	TRINITY_DN46482_c1_g2	1.99224	up	-	TIR/NBS, partial [Pinus taeda]	1.59	2.85	2.16	0.93	0.84	1.02	2.2	0.93
GO:0043531	ADP binding	molecular_function	9	0	TRINITY_DN46482_c1_g4	-4.99807	down	VICTR	putative TIR/NBS/LRR disease resistance protein, partial [Pinus taeda]	0	0.72	1.23	7.87	4.77	6.04	0.65	6.23
GO:0043531	ADP binding	molecular_function	9	0	TRINITY_DN46482_c1_g7	-1.68159	down	-	putative truncated TIR-NBS-LRR protein [Pinus monticola]	1.21	2.45	2.13	11.62	11.55	8.57	1.93	10.58
GO:0043531	ADP binding	molecular_function	9	0	TRINITY_DN46515_c0_g1	-1.67177	down	PIRL5	unknown [Picea sitchensis]	0.65	1.32	1.63	8.53	7.94	4.96	1.2	7.14
GO:0043531	ADP binding	molecular_function	9	0	TRINITY_DN46515_c0_g2	-1.94644	down	-	NBS/LRR, partial [Pinus taeda]	5.85	11.39	9.47	40.61	44.69	35.29	8.9	40.2
GO:0043531	ADP binding	molecular_function	9	0	TRINITY_DN46576_c1_g1	-2.76906	down	At1g12280	unknown [Picea sitchensis]	0.23	0.62	1.57	8.61	9.91	11.19	0.81	9.9
GO:0043531	ADP binding	molecular_function	9	0	TRINITY_DN46603_c2_g1	-2.65033	down	RPP1	putative truncated TIR-NBS-LRR protein [Pinus monticola]	0.63	1.24	0.55	11.55	9.15	7.55	0.81	9.42
GO:0043531	ADP binding	molecular_function	9	0	TRINITY_DN46604_c1_g1	2.75166	up	CSA1	hypothetical protein EUGRSUZ_B01867 [Eucalyptus grandis]	11.14	18.69	15.06	5.98	4.4	3.16	14.96	4.51
GO:0043531	ADP binding	molecular_function	9	0	TRINITY_DN46632_c0_g3	-1.59757	down	At4g19050	PREDICTED: TMV resistance protein N-like [Eucalyptus grandis]	1.96	3.06	4.55	19.73	16.58	19.02	3.19	18.44
GO:0043531	ADP binding	molecular_function	9	0	TRINITY_DN46637_c0_g1	-1.89222	down	RPP1	predicted protein [Physcomitrella patens]	4.85	9.73	14.83	64.54	65.07	54.41	9.8	61.34
GO:0043531	ADP binding	molecular_function	9	0	TRINITY_DN46768_c0_g4	4.7172	up	TAO1	hypothetical protein AXG93_2912s1330 [Marchantia polymorpha subsp. polymorpha]	24.31	19.2	12.39	2.16	1.5	0.99	18.63	1.55
GO:0043531	ADP binding	molecular_function	9	0	TRINITY_DN46910_c2_g3	-1.86685	down	scrib	PREDICTED: leucine-rich repeat protein soc-2 homolog [Eucalyptus grandis]	1.49	2.36	3.31	12.09	11.63	10.34	2.39	11.35
GO:0043531	ADP binding	molecular_function	9	0	TRINITY_DN46918_c1_g1	-1.46719	down	CSA1	putative TIR-NBS-LRR protein [Pinus monticola]	1.6	2.52	1.76	8.3	7.94	7.54	1.96	7.93
GO:0043531	ADP binding	molecular_function	9	0	TRINITY_DN46918_c1_g2	1.41249	up	RPS6	unknown [Picea sitchensis]	3.68	3.42	1.74	1.85	2.08	1.96	2.95	1.96
GO:0043531	ADP binding	molecular_function	9	0	TRINITY_DN46923_c1_g1	-3.36563	down	v1g189306	PREDICTED: TMV resistance protein N [Eucalyptus grandis]	0.14	0.66	0.84	10.73	10.66	9.36	0.55	10.25
GO:0043531	ADP binding	molecular_function	9	0	TRINITY_DN46975_c0_g1	1.94594	up	scrib	predicted protein [Physcomitrella patens]	37.52	22.15	20.97	11.45	8.25	13.15	26.88	10.95
GO:0043531	ADP binding	molecular_function	9	0	TRINITY_DN47020_c0_g2	-7.77358	down	At5g66910	PREDICTED: TMV resistance protein N-like [Daucus carota subsp. sativus]	0.02	0.11	0.01	13.23	10.54	11.18	0.05	11.65
GO:0043531	ADP binding	molecular_function	9	0	TRINITY_DN47039_c1_g1	-8.66506	down	TAO1	hypothetical protein AMTR_s00056p00215980 [Amborella trichopoda]	0	0	0	4.33	2.73	3.44	0	3.5
GO:0043531	ADP binding	molecular_function	9	0	TRINITY_DN47085_c1_g1	-1.09648	down	Sur-8	unknown [Picea sitchensis]	2.32	6.39	5.06	24.98	17.04	14.87	4.59	18.96
GO:0043531	ADP binding	molecular_function	9	0	TRINITY_DN47101_c1_g4	-1.98878	down	RPP1	predicted protein [Physcomitrella patens]	1.22	3.08	1.69	3.63	3.18	4.03	2	3.61
GO:0043531	ADP binding	molecular_function	9	0	TRINITY_DN47123_c1_g1	4.88491	up	CSA1	PREDICTED: TMV resistance protein N [Vitis vinifera]	12.75	12.5	9.33	0.37	0.25	0.59	11.53	0.4
GO:0043531	ADP binding	molecular_function	9	0	TRINITY_DN47194_c2_g1	-1.33185	down	TAO1	unknown [Picea sitchensis]	3.62	5.06	5.98	24.6	21.54	24.45	4.89	23.53
GO:0043531	ADP binding	molecular_function	9	0	TRINITY_DN47194_c2_g3	-1.84536	down	RRS1	putative NBS-LRR protein G8029, partial [Pinus monticola]	1.18	2.84	2.89	14.86	16.31	12.85	2.3	14.67
GO:0043531	ADP binding	molecular_function	9	0	TRINITY_DN47200_c3_g2	3.037	up	At4g19050	PREDICTED: putative disease resistance protein RGA3 [Malus domestica]	0.74	1.46	1.46	0.37	0.19	0.18	1.22	0.25
GO:0043531	ADP binding	molecular_function	9	0	TRINITY_DN47221_c1_g2	-6.65883	down	At1g12280	PREDICTED: putative disease resistance protein RGA1 [Elaeis guineensis]	0.05	0	0.1	9.82	8.89	9.88	0.05	9.53
GO:0043531	ADP binding	molecular_function	9	0	TRINITY_DN47237_c2_g1	-4.22328	down	-	unknown [Picea sitchensis]	1.2	0.83	0.15	11.11	10.07	10.69	0.73	10.62
GO:0043531	ADP binding	molecular_function	9	0	TRINITY_DN47237_c3_g1	-3.68633	down	-	unknown [Picea sitchensis]	0.75	1.37	0.13	14.55	15.11	15.8	0.75	15.15
GO:0043531	ADP binding	molecular_function	9	0	TRINITY_DN47245_c1_g1	-3.18783	down	TAO1	putative truncated TIR-NBS-LRR protein [Pinus monticola]	0.95	3.55	3.45	46.22	40.47	31.64	2.65	39.44
GO:0043531	ADP binding	molecular_function	9	0	TRINITY_DN47268_c1_g1	-6.73474	down	RPP8L3	unknown [Picea sitchensis]	2.08	1.79	4.02	19.72	21.16	28.37	2.63	23.08
GO:0043531	ADP binding	molecular_function	9	0	TRINITY_DN47272_c4_g1	1.75788	up	At4g11170	leucine-rich repeat-containing protein, putative [Ricinus communis]	11.88	10.16	8.49	5.49	2.32	3.68	10.18	3.83
GO:0043531	ADP binding	molecular_function	9	0	TRINITY_DN47272_c4_g3	5.32005	up	RLM1A	PREDICTED: TMV resistance protein N-like isoform X1 [Solanum tuberosum]	2.62	2.81	1.68	0.15	0.17	0	2.37	0.11
GO:0043531	ADP binding	molecular_function	9	0	TRINITY_DN47289_c1_g1	-1.07833	down	-	putative NBS-LRR protein G8029, partial [Pinus monticola]	1.18	1.71	1.94	5	6.51	5.54	1.61	5.68
GO:0043531	ADP binding	molecular_function	9	0	TRINITY_DN47289_c2_g2	-1.13563	down	At5g47280	putative truncated TIR-NBS-LRR protein [Pinus monticola]	2.48	6.16	3.96	15.85	15.95	14.32	4.2	15.37
GO:0043531	ADP binding	molecular_function	9	0	TRINITY_DN47294_c2_g2	-5.77356	down	At5g43730	PREDICTED: probable disease resistance protein At4g27220, partial [Solanum tuberosum]	0	0.46	0.43	34.06	21.23	39.66	0.3	31.65
GO:0043531	ADP binding	molecular_function	9	0	TRINITY_DN47300_c1_g2	-1.23128	down	At1g63350	NBS/LRR, partial [Pinus taeda]	4.07	7.47	6.59	22.15	22.96	22.09	6.04	22.4
GO:0043531	ADP binding	molecular_function	9	0	TRINITY_DN47301_c1_g1	2.01574	up	TAO1	predicted protein [Physcomitrella patens]	5.33	9.26	9.05	3.11	3.99	5.24	7.88	4.11
GO:0043531	ADP binding	molecular_function	9	0	TRINITY_DN47307_c2_g1	-1.41857	down	RPP1	unknown [Picea sitchensis]	2.09	6.14	6.17	26.13	24.44	31.82	4.8	27.46
GO:0043531	ADP binding	molecular_function	9	0	TRINITY_DN47318_c0_g1	-2.11524	down	CSA1	PREDICTED: disease resistance protein TAO1-like isoform X2 [Eucalyptus grandis]	0.13	0.19	0.33	1.14	1.64	4.9	0.22	2.56
GO:0043531	ADP binding	molecular_function	9	0	TRINITY_DN47318_c3_g2	1.25831	up	IRL3	PREDICTED: TMV resistance protein N [Amborella trichopoda]	3.52	6	7.48	5.16	4.62	3.88	5.67	4.55
GO:0043531	ADP binding	molecular_function	9	0	TRINITY_DN47325_c4_g1	-1.33595	down	RPS4	putative truncated TIR-NBS-LRR protein [Pinus monticola]	7.06	12.99	9.29	42.15	50.68	43.53	9.78	45.45
GO:0005618	cell wall	cellular_component	6	0	TRINITY_DN32950_c0_g1	1.11845	up	SBT1.5	hypothetical protein PHAVU_008G013300g [Phaseolus vulgaris]	5.7	10.96	7.55	7.18	6.16	6.42	8.07	6.59
GO:0005618	cell wall	cellular_component	6	0	TRINITY_DN32950_c0_g2	-4.59451	down	SBT1.5	Peptidase S8/S53 domain-containing protein [Cynara cardunculus var. scolymus]	0.6	1.63	0.82	26.87	55.02	58.48	1.02	46.79
GO:0005618	cell wall	cellular_component	6	0	TRINITY_DN32960_c1_g1	-1.29741	down	CHLI	PREDICTED: magnesium-chelatase subunit ChlI, chloroplastic [Prunus mume]	4.47	9.75	10.61	24.15	37.62	40.55	8.28	34.11
GO:0005618	cell wall	cellular_component	6	0	TRINITY_DN33240_c1_g1	-9.72349	down	SBTI1.1	SDD1 protein, partial [Cathaya argyrophylla]	0	0	0.06	26.9	26.95	34	0.02	29.28
GO:0005618	cell wall	cellular_component	6	0	TRINITY_DN33240_c1_g2	-4.71644	down	SBTI1.1	SDD1 protein, partial [Pinus thunbergii]	0.15	0.48	0.47	14.41	15.63	12.98	0.37	14.34
GO:0005618	cell wall	cellular_component	6	0	TRINITY_DN33267_c1_g5	2.13486	up	XTHB	pollen major allergen No.121 isoform 2 [Cryptomeria japonica]	4.85	6.07	18.34	3.3	4.93	3.6	9.75	3.94
GO:0005618	cell wall	cellular_component	6	0	TRINITY_DN33349_c1_g1	-2.84401	down	CRSP	PREDICTED: CO(2)-response secreted protease-like isoform X2 [Musa acuminata subsp. malaccensis]	0.18	1.72	3.13	13.66	21.13	23.64	1.68	19.48
GO:0005618	cell wall	cellular_component	6	0	TRINITY_DN33423_c1_g1	11.1054	up	EP1	unknown [Picea sitchensis]	13.61	6.88	6.33	0.01	0	0	8.94	0
GO:0005618	cell wall	cellular_component	6	0	TRINITY_DN33567_c0_g1	2.71924	up	-	PREDICTED: heat shock 70 kDa protein, mitochondrial [Nelumbo nucifera]	27.81	35.9	30.05	8.77	8.35	7.38	31.25	8.17
GO:0005618	cell wall	cellular_component	6	0	TRINITY_DN33569_c0_g1	-1.98629	down	-	actin, partial [Syntrichia caninervis]	0.34	0.29	0.12	1.79	1.99	1.48	0.25	1.75
GO:0005618	cell wall	cellular_component	6	0	TRINITY_DN33728_c0_g1	-1.38023	down	At4g14310	PREDICTED: uncharacterized protein LOC104602833 [Nelumbo nucifera]	0.31	0.47	0.76	2.07	2.6	2.11	0.51	2.26
GO:0005618	cell wall	cellular_component	6	0	TRINITY_DN33832_c0_g1	-5.92864	down	GER4	germin-like protein [Pinus taeda]	0.04	0.14	0.3	11.07	21.95	23.15	0.16	18.72
GO:0005618	cell wall	cellular_component	6	0	TRINITY_DN33933_c0_g1	1.75297	up	GSO1	PREDICTED: receptor-like protein 12 [Ziziphus jujuba]	0.4	1.18	0.65	0.67	0.28	0.14	0.74	0.36
GO:0005618	cell wall	cellular_component	6	0	TRINITY_DN34036_c0_g2	1.69658	up	Bp10	hypothetical protein MIMGU_mgv1a004531mg [Erythranthe guttata]	1.39	2.32	4.51	2.09	1.08	1.14	2.74	1.44
GO:0005618	cell wall	cellular_component	6	0	TRINITY_DN34190_c1_g1	-6.87326	down	SBT1.5	predicted protein [Physcomitrella patens]	0.06	0.21	0.03	17.98	21.1	25.97	0.1	21.68
GO:0005618	cell wall	cellular_component	6	0	TRINITY_DN34354_c1_g1	-6.09823	down	CRSP	PREDICTED: subtilisin-like protease SBT3.5 [Amborella trichopoda]	0.11	0.23	0.09	12.65	19.37	17.35	0.14	16.46
GO:0005618	cell wall	cellular_component	6	0	TRINITY_DN34425_c1_g1	1.99862	up	BGAL8	unknown [Picea sitchensis]	13.21	24.74	22.73	17.33	17.17	13.68	20.23	16.06
GO:0005618	cell wall	cellular_component	6	0	TRINITY_DN34917_c1_g3	12.265	up	GSVIVT00023967001	peroxidase [Picea abies]	25.3	30.07	163.34	0	0	0	72.9	0
GO:0005618	cell wall	cellular_component	6	0	TRINITY_DN34960_c0_g6	-2.26533	down	HSP70	PREDICTED: heat shock 70 kDa protein [Capsicum annuum]	0.07	0.37	0.16	1.48	1.68	1.75	0.2	1.64
GO:0005618	cell wall	cellular_component	6	0	TRINITY_DN34962_c0_g1	-2.54545	down	GSVIVT00026920001	unknown [Picea sitchensis]	10.2	12.58	19.93	184.28	125.71	114.74	14.24	141.58
GO:0005618	cell wall	cellular_component	6	0	TRINITY_DN34981_c0_g1	-1.41704	down	FLA1	unknown [Picea sitchensis]	23.03	39.39	104.42	211.74	260.45	275.43	55.61	249.21
GO:0005618	cell wall	cellular_component	6	0	TRINITY_DN35049_c0_g1	-1.38168	down	TUBB1	PREDICTED: tubulin beta-2 chain-like [Malus domestica]	30.11	53.24	110.49	274.46	301.02	277.88	64.61	284.45
GO:0005618	cell wall	cellular_component	6	0	TRINITY_DN35446_c0_g3	-2.85215	down	SBT3.5	PREDICTED: subtilisin-like protease SBT3.9 isoform X2 [Nelumbo nucifera]	0.19	1.33	2.57	11.64	18.04	12.2	1.36	13.96
GO:0005618	cell wall	cellular_component	6	0	TRINITY_DN35640_c0_g1	2.03631	up	TUBA3	unknown [Picea sitchensis]	14.48	10.27	4.85	4.42	2.67	2.84	9.87	3.31
GO:0005618	cell wall	cellular_component	6	0	TRINITY_DN35741_c0_g1	-3.00371	down	SBT2.2	Subtilisin-like protease [Anthurium amnicola]	0.68	1.42	3.08	18.86	25.29	22.59	1.73	22.25
GO:0005618	cell wall	cellular_component	6	0	TRINITY_DN35801_c2_g5	-7.2777	down	LRX5	PREDICTED: leucine-rich repeat extensin-like protein 4 [Nelumbo nucifera]	0	0.02	0	1.84	2.67	2.34	0.01	2.28
GO:0005618	cell wall	cellular_component	6	0	TRINITY_DN35808_c0_g1	-9.10286	down	XTH7	PREDICTED: probable xyloglucan endotransglucosylase/hydrolase protein 7 [Erythranthe guttata]	0.2	0.48	1.01	445.5	579.98	537.35	0.56	520.94
GO:0005618	cell wall	cellular_component	6	0	TRINITY_DN35820_c0_g1	-2.52243	down	GASA1	unknown [Picea sitchensis]	1	1.65	22.16	72.98	96.37	81.5	8.27	83.62
GO:0005618	cell wall	cellular_component	6	0	TRINITY_DN35830_c2_g1	-2.99183	down	XTH15	unknown [Picea sitchensis]	0.57	0.1	0.15	3.55	3.18	3.34	0.27	3.36
GO:0005618	cell wall	cellular_component	6	0	TRINITY_DN35877_c0_g1	1.58613	up	ANN1	unknown [Picea sitchensis]	210.96	159.97	207.43	114.36	120.2	108.12	192.79	114.23
GO:0005618	cell wall	cellular_component	6	0	TRINITY_DN35957_c0_g2	2.20017	up	BGAL8	unknown [Picea sitchensis]	8.7	17.19	12.54	4.91	3.79	5.03	12.81	4.58
GO:0005618	cell wall	cellular_component	6	0	TRINITY_DN35997_c1_g1	-11.7417	down	ACT3	unknown [Picea sitchensis]	0	0	0	9.34	9.96	10.56	0	9.95
GO:0005618	cell wall	cellular_component	6	0	TRINITY_DN36005_c1_g1	2.06355	up	PNC1	peroxidase [Picea abies]	1.53	8.17	56.76	17.14	8.59	12.84	22.15	12.86
GO:0005618	cell wall	cellular_component	6	0	TRINITY_DN36005_c1_g3	4.21588	up	PER52	peroxidase [Picea abies]	8.07	22.79	141.8	9.7	2.78	3.08	57.55	5.19
GO:0005618	cell wall	cellular_component	6	0	TRINITY_DN36005_c1_g5	3.90051	up	PNC1	class III secretory peroxidase [Ginkgo biloba]	5.44	4.87	10.23	2.44	0	0	6.85	0.81
GO:0005618	cell wall	cellular_component	6	0	TRINITY_DN36335_c0_g2	-1.52055	down	FH9	PREDICTED: formin-like protein 11 [Vigna radiata var. radiata]	0.24	0.51	0.72	2.61	2.3	2.18	0.49	2.36
GO:0005618	cell wall	cellular_component	6	0	TRINITY_DN36335_c0_g3	-1.40831	down	FH8	PREDICTED: formin-like protein 5 [Tarenaya hassleriana]	0.17	0.52	0.74	2.68	1.73	2.4	0.48	2.27
GO:0005618	cell wall	cellular_component	6	0	TRINITY_DN36373_c2_g1	-4.11573	down	ACT7	actin [Larix gmelinii]	0.49	1.16	2.21	25.15	48.99	37.38	1.29	37.17
GO:0005618	cell wall	cellular_component	6	0	TRINITY_DN36394_c0_g1	4.98962	up	PAP2	Purple acid phosphatase 2 [Anthurium amnicola]	54.83	49.72	53.83	3.5	2.42	2.8	52.79	2.91
GO:0005618	cell wall	cellular_component	6	0	TRINITY_DN36427_c0_g1	2.12319	up	PER15	unknown [Picea sitchensis]	13.51	16.55	21.54	16.89	2.95	0.3	17.2	6.71
GO:0005618	cell wall	cellular_component	6	0	TRINITY_DN36435_c3_g2	2.12766	up	XTH5	unknown [Picea sitchensis]	29	43.7	45.48	31.61	7.54	6.88	39.39	15.34
GO:0005618	cell wall	cellular_component	6	0	TRINITY_DN36435_c4_g1	-2.37421	down	XTH5	PREDICTED: putative xyloglucan endotransglucosylase/hydrolase protein 1 [Elaeis guineensis]	0.39	0.51	2.2	4.27	11.68	9.93	1.03	8.63
GO:0005618	cell wall	cellular_component	6	0	TRINITY_DN37112_c0_g1	-6.14899	down	EXPB3	expansin B1 [Raphanus sativus]	0.2	0.25	0.17	63.31	10.06	4.44	0.21	25.94
GO:0005618	cell wall	cellular_component	6	0	TRINITY_DN37180_c0_g1	-9.58887	down	SBT1.3	unknown [Picea sitchensis]	0	0	0	3.41	8.07	10.12	0	7.2
GO:0005618	cell wall	cellular_component	6	0	TRINITY_DN37180_c0_g3	-9.71456	down	SBT1.4	unknown [Picea sitchensis]	0	0	0.13	59.57	79.69	81.4	0.04	73.55
GO:0005618	cell wall	cellular_component	6	0	TRINITY_DN37180_c0_g5	-3.64327	down	SBT1.7	unknown [Picea sitchensis]	0.68	1.19	0.6	9.73	11.86	7.9	0.82	9.83
GO:0005618	cell wall	cellular_component	6	0	TRINITY_DN37180_c0_g6	-10.7512	down	SBT1.3	unknown [Picea sitchensis]	0	0	0	7.48	8.82	13.86	0	10.05
GO:0005618	cell wall	cellular_component	6	0	TRINITY_DN37235_c0_g1	1.75473	up	TUFA	PREDICTED: elongation factor Tu, mitochondrial-like isoform X1 [Elaeis guineensis]	16.22	25.28	24.38	10.67	11.76	10.77	21.96	11.07
GO:0005618	cell wall	cellular_component	6	0	TRINITY_DN37333_c3_g3	-8.02996	down	ACT7	PREDICTED: actin-7-like isoform X1 [Populus euphratica]	0.06	0.25	0.19	47.89	86.2	85.22	0.17	73.1
GO:0005618	cell wall	cellular_component	6	0	TRINITY_DN37414_c1_g2	9.951	up	flp	hypothetical protein AXX17_ATUG03410 [Arabidopsis thaliana]	8.81	2.31	2.46	0.02	0	0	4.53	0.01
GO:0005618	cell wall	cellular_component	6	0	TRINITY_DN37635_c0_g3	-3.83624	down	-	PREDICTED: uncharacterized protein LOC108477699 [Gossypium arboreum]	0.93	0.6	0.56	4.47	3.55	2.85	0.7	3.62
GO:0005618	cell wall	cellular_component	6	0	TRINITY_DN37778_c2_g2	-1.54982	down	TUBA	RecName: Full=Tubulin alpha chain	24.15	43.5	187.62	376.57	415.22	445.82	85.09	412.54
GO:0005618	cell wall	cellular_component	6	0	TRINITY_DN37824_c0_g1	5.37359	up	MHB1	class 1 non-symbiotic hemoglobin [Prunus avium]	137.19	148.38	80.34	9.57	4.7	0.9	121.97	5.06
GO:0005618	cell wall	cellular_component	6	0	TRINITY_DN37837_c0_g1	5.26812	up	KTI2	PREDICTED: kunitz trypsin inhibitor 2 [Vitis vinifera]	510.8	285.15	121.23	41.67	6.02	0.38	305.73	16.02
GO:0005618	cell wall	cellular_component	6	0	TRINITY_DN37859_c0_g6	-4.25962	down	XTH6	hypothetical protein AMTR_s00026p00210850 [Amborella trichopoda]	4.02	21.59	65.63	881.02	972.65	1327.51	30.41	1060.39
GO:0005618	cell wall	cellular_component	6	0	TRINITY_DN37859_c0_g7	-9.35003	down	XTH10	PREDICTED: probable xyloglucan endotransglucosylase/hydrolase protein 10 [Nelumbo nucifera]	0.08	0.07	0.12	91.73	108.57	112.16	0.09	104.15
GO:0005618	cell wall	cellular_component	6	0	TRINITY_DN37859_c1_g1	-8.79711	down	XTH6	PREDICTED: probable xyloglucan endotransglucosylase/hydrolase protein 7 [Sesamum indicum]	0.23	0.91	1	456.18	575.24	570.28	0.71	533.9
GO:0005618	cell wall	cellular_component	6	0	TRINITY_DN37928_c3_g1	3.63411	up	XYL2	hypothetical protein AXG93_2210s1050 [Marchantia polymorpha subsp. polymorpha]	14.52	19.53	7.37	2.55	1.51	2.12	13.81	2.06
GO:0005618	cell wall	cellular_component	6	0	TRINITY_DN38184_c0_g1	-5.22656	down	ACT7	actin 4 [Picea abies]	0.1	0.15	0.54	12.27	23.97	17.16	0.26	17.8
GO:0005618	cell wall	cellular_component	6	0	TRINITY_DN38184_c2_g4	-10.5907	down	AC100	PREDICTED: actin-7 [Brassica napus]	0	0	0	12.44	14.96	12.3	0	13.23
GO:0005618	cell wall	cellular_component	6	0	TRINITY_DN38219_c1_g1	-1.97229	down	EXPA3	expansin 1 [Musa acuminata]	2.77	1.96	1.07	9.81	10.15	10.74	1.93	10.23
GO:0005618	cell wall	cellular_component	6	0	TRINITY_DN38345_c0_g2	3.5535	up	-	RecName: Full=Glyceraldehyde-3-phosphate dehydrogenase, cytosolic	649.7	384.29	248.56	82.38	74.39	69.5	427.52	75.42
GO:0005618	cell wall	cellular_component	6	0	TRINITY_DN38393_c1_g4	5.04749	up	GSVIVT00023967001	PREDICTED: peroxidase 4 [Musa acuminata subsp. malaccensis]	17.48	20.48	28.77	3.27	0	0	22.24	1.09
GO:0005618	cell wall	cellular_component	6	0	TRINITY_DN38393_c2_g1	5.43373	up	PNC1	peroxidase [Picea abies]	17.37	18.96	27.58	2.46	0	0	21.3	0.82
GO:0005618	cell wall	cellular_component	6	0	TRINITY_DN38525_c0_g6	2.42006	up	BGAL8	unknown [Picea sitchensis]	31.48	63.87	39.45	16.63	13.38	13.28	44.93	14.43
GO:0005618	cell wall	cellular_component	6	0	TRINITY_DN38569_c0_g1	-1.99868	down	SBT5.6	PREDICTED: subtilisin-like protease SBT5.3 [Amborella trichopoda]	1.19	2.31	7.26	18.38	24.55	28.72	3.59	23.88
GO:0005618	cell wall	cellular_component	6	0	TRINITY_DN38569_c0_g3	-2.9179	down	SBT5.6	PREDICTED: subtilisin-like protease SBT5.3 [Amborella trichopoda]	1.01	1.39	1.87	19.16	15.29	16.7	1.42	17.05
GO:0005618	cell wall	cellular_component	6	0	TRINITY_DN38772_c0_g1	-7.90502	down	GLP1	unknown [Picea sitchensis]	0.07	0.17	0.7	52.54	157.5	175.16	0.31	128.4
GO:0005618	cell wall	cellular_component	6	0	TRINITY_DN38811_c0_g1	1.88792	up	GDPD5	unknown [Picea sitchensis]	8.95	14.71	22.33	8.43	6.94	5.59	15.33	6.99
GO:0005618	cell wall	cellular_component	6	0	TRINITY_DN38998_c0_g1	-2.54051	down	PAE7	unknown [Picea sitchensis]	8.01	26.83	131.7	469.66	520.71	563.33	55.51	517.9
GO:0005618	cell wall	cellular_component	6	0	TRINITY_DN39073_c0_g1	1.20738	up	EXL2	unknown [Picea sitchensis]	104.81	57.44	81.22	60.53	82.6	50.54	81.16	64.56
GO:0005618	cell wall	cellular_component	6	0	TRINITY_DN12672_c0_g1	-10.6407	down	XTH10	PREDICTED: probable xyloglucan endotransglucosylase/hydrolase protein 10 isoform X1 [Theobroma cacao]	0	0	0.02	20.32	21.75	20.95	0.01	21.01
GO:0005618	cell wall	cellular_component	6	0	TRINITY_DN23129_c0_g1	-2.88665	down	PME31	PREDICTED: pectinesterase 31 [Musa acuminata subsp. malaccensis]	0.33	0.74	0.46	4.64	7.44	7.12	0.51	6.4
GO:0005618	cell wall	cellular_component	6	0	TRINITY_DN23349_c0_g1	9.66984	up	PME11	PREDICTED: putative pectinesterase 11 [Theobroma cacao]	0.52	0.19	3.64	0	0	0	1.45	0
GO:0005618	cell wall	cellular_component	6	0	TRINITY_DN24025_c0_g1	-4.47336	down	LRX6	hypothetical protein POPTR_0010s09310g, partial [Populus trichocarpa]	0.05	0.49	1.7	24.92	26.63	29.71	0.75	27.09
GO:0005618	cell wall	cellular_component	6	0	TRINITY_DN25796_c0_g1	-3.83384	down	RCA2	PREDICTED: ribulose bisphosphate carboxylase/oxygenase activase, chloroplastic [Cucumis sativus]	0.02	0.16	0.02	1.64	1.99	1.26	0.07	1.63
GO:0005618	cell wall	cellular_component	6	0	TRINITY_DN26474_c0_g1	-1.79853	down	EB1C	unknown [Picea sitchensis]	0.85	1.53	3.46	9.26	13.61	11.94	1.95	11.6
GO:0005618	cell wall	cellular_component	6	0	TRINITY_DN27000_c0_g1	-7.60605	down	MED37E	PREDICTED: heat shock 70 kDa protein [Gossypium hirsutum]	0.01	0.01	0	2.9	2.64	2.4	0.01	2.65
GO:0005618	cell wall	cellular_component	6	0	TRINITY_DN27826_c0_g1	-8.02196	down	At3g05950	unknown [Picea sitchensis]	0	0.09	0	6.01	19.08	17.94	0.03	14.34
GO:0005618	cell wall	cellular_component	6	0	TRINITY_DN28201_c0_g1	-3.4636	down	SBT2.5	unknown [Picea sitchensis]	1.69	3.2	1.87	32.93	45.36	47.44	2.25	41.91
GO:0005618	cell wall	cellular_component	6	0	TRINITY_DN28310_c0_g1	1.61246	up	PME68	unknown [Picea sitchensis]	1.92	4.48	8.97	2.05	3.85	2.52	5.12	2.81
GO:0005618	cell wall	cellular_component	6	0	TRINITY_DN28694_c0_g2	-4.67297	down	BXL5	PREDICTED: probable beta-D-xylosidase 5 [Amborella trichopoda]	0.02	0.08	0.05	1.67	2.16	2.43	0.05	2.09
GO:0005618	cell wall	cellular_component	6	0	TRINITY_DN28935_c0_g1	3.24721	up	EXPA1	expansin A2 [Pinus radiata]	0.5	3.37	38.21	8.1	1.65	1.33	14.03	3.69
GO:0005618	cell wall	cellular_component	6	0	TRINITY_DN29504_c0_g1	6.09379	up	KTI2	unknown [Picea sitchensis]	155.19	61.54	35.09	5.56	1.08	0.26	83.94	2.3
GO:0005618	cell wall	cellular_component	6	0	TRINITY_DN29587_c0_g3	-4.47324	down	SBT1.6	unknown [Picea sitchensis]	0.09	0	0	0.89	1.75	1.41	0.03	1.35
GO:0005618	cell wall	cellular_component	6	0	TRINITY_DN29626_c0_g1	-7.13305	down	ANN1	hypothetical protein SELMODRAFT_271856 [Selaginella moellendorffii]	0.03	0.01	0.03	5.43	6.33	4.99	0.02	5.58
GO:0005618	cell wall	cellular_component	6	0	TRINITY_DN29708_c0_g1	-4.3826	down	At1g75040	PREDICTED: thaumatin-like protein [Gossypium hirsutum]	0.19	0.6	0.78	14.87	20.28	19.96	0.52	18.37
GO:0005618	cell wall	cellular_component	6	0	TRINITY_DN29820_c0_g1	-5.45258	down	GLP4	germin-like protein [Pinus radiata]	0.04	0.1	0.03	3.51	3.65	4.12	0.06	3.76
GO:0005618	cell wall	cellular_component	6	0	TRINITY_DN30004_c0_g2	1.23187	up	PME53	PREDICTED: probable pectinesterase 53 isoform X2 [Elaeis guineensis]	1.04	1.74	3.04	1.17	1.4	1.6	1.94	1.39
GO:0005618	cell wall	cellular_component	6	0	TRINITY_DN30466_c0_g1	-1.13356	down	IMK2	PREDICTED: probably inactive leucine-rich repeat receptor-like protein kinase IMK2 [Nelumbo nucifera]	0.34	0.74	1.49	2.69	4	2.73	0.86	3.14
GO:0005618	cell wall	cellular_component	6	0	TRINITY_DN30600_c0_g1	-7.86032	down	PME53	PREDICTED: probable pectinesterase 53 [Cucumis melo]	0	0	0.01	1.16	3.49	2.82	0	2.49
GO:0005618	cell wall	cellular_component	6	0	TRINITY_DN30820_c0_g1	-2.22694	down	SBT2.5	hypothetical protein AMTR_s00025p00169730 [Amborella trichopoda]	1.23	3.5	4.05	19.12	25.88	22.63	2.93	22.54
GO:0005618	cell wall	cellular_component	6	0	TRINITY_DN31021_c0_g1	1.02226	up	-	unknown [Picea sitchensis]	50.75	40.57	34.83	39.32	35.34	35.93	42.05	36.86
GO:0005618	cell wall	cellular_component	6	0	TRINITY_DN31077_c0_g2	-8.07539	down	AIR3	hypothetical protein PRUPE_ppa001727mg [Prunus persica]	0.01	0	0.01	2.86	3.82	4.72	0.01	3.8
GO:0005618	cell wall	cellular_component	6	0	TRINITY_DN31077_c0_g3	-5.91557	down	AIR3	PREDICTED: subtilisin-like protease SBT5.3 [Brassica napus]	0	0.06	0.01	2.95	1.89	2.16	0.02	2.33
GO:0005618	cell wall	cellular_component	6	0	TRINITY_DN31223_c0_g2	-4.97509	down	At3g10080	unknown [Picea sitchensis]	0.15	0.29	0.31	12.19	14.46	13.74	0.25	13.46
GO:0005618	cell wall	cellular_component	6	0	TRINITY_DN31239_c0_g1	-2.07777	down	PME68	unknown [Picea sitchensis]	7.11	4.67	1.07	27.7	39.9	32.13	4.28	33.24
GO:0005618	cell wall	cellular_component	6	0	TRINITY_DN31378_c0_g1	-10.4068	down	AGAL1	alpha-galactosidase [Medicago truncatula]	0	0	0	1.95	2.41	2.23	0	2.2
GO:0005618	cell wall	cellular_component	6	0	TRINITY_DN31379_c0_g1	-7.61749	down	LRX3	PREDICTED: leucine-rich repeat extensin-like protein 4 [Gossypium hirsutum]	0	0	0.05	6.31	8.07	7.86	0.02	7.41
GO:0005618	cell wall	cellular_component	6	0	TRINITY_DN31411_c0_g1	-2.1023	down	EXL2	unknown [Picea sitchensis]	26.32	45.26	58.27	268.78	311.85	363.38	43.28	314.67
GO:0005618	cell wall	cellular_component	6	0	TRINITY_DN31415_c0_g1	-2.25009	down	EXPA16	expansin 1 [Musa acuminata]	1.46	1.23	1.76	13.18	11.19	12.83	1.48	12.4
GO:0005618	cell wall	cellular_component	6	0	TRINITY_DN31422_c0_g1	-8.30951	down	PME8	PREDICTED: probable pectinesterase 8 [Ziziphus jujuba]	0	0.01	0	2.35	3.52	3.64	0	3.17
GO:0005618	cell wall	cellular_component	6	0	TRINITY_DN31540_c0_g1	-5.36288	down	PER49	peroxidase [Picea abies]	0.16	1.24	1.1	60.76	58.02	49.04	0.83	55.94
GO:0005618	cell wall	cellular_component	6	0	TRINITY_DN31989_c0_g1	-4.04263	down	SBT1.5	PREDICTED: subtilisin-like protease SBT1.7 [Pyrus x bretschneideri]	0.26	1.41	0.05	14.73	13.83	16.92	0.57	15.16
GO:0005618	cell wall	cellular_component	6	0	TRINITY_DN32086_c0_g1	1.02232	up	HEXO3	PREDICTED: beta-hexosaminidase 3 [Ziziphus jujuba]	12.47	14.55	12.81	10.76	12.73	10.5	13.28	11.33
GO:0005618	cell wall	cellular_component	6	0	TRINITY_DN32295_c0_g1	-1.24645	down	-	unknown [Picea sitchensis]	4.25	5.62	7.6	30.63	24.49	18.11	5.82	24.41
GO:0005618	cell wall	cellular_component	6	0	TRINITY_DN32295_c0_g2	-1.56769	down	MIK1	unknown [Picea sitchensis]	2.08	2.99	4.81	20.46	15.36	13.88	3.29	16.57
GO:0005618	cell wall	cellular_component	6	0	TRINITY_DN32392_c0_g1	2.67053	up	CLPC1	hypothetical protein SELMODRAFT_439163 [Selaginella moellendorffii]	23.23	15.98	10.28	5.89	5.04	3.86	16.5	4.93
GO:0005618	cell wall	cellular_component	6	0	TRINITY_DN32401_c0_g1	-3.71557	down	XTH33	PREDICTED: probable xyloglucan endotransglucosylase/hydrolase protein 33 [Elaeis guineensis]	0.01	0.06	0.43	3.05	3.89	4.03	0.17	3.66
GO:0005618	cell wall	cellular_component	6	0	TRINITY_DN32696_c0_g5	1.49372	up	TIR2	-	4226.49	6198.44	7727.44	4024.16	3366.14	4002.49	6050.79	3797.6
GO:0005618	cell wall	cellular_component	6	0	TRINITY_DN32743_c0_g1	1.44514	up	CDC48A	cell division cycle protein 48 homolog [Nicotiana tabacum]	18.29	15.82	8.38	7.88	11.63	9.66	14.16	9.72
GO:0005618	cell wall	cellular_component	6	0	TRINITY_DN32743_c0_g2	1.16534	up	CDC48E	PREDICTED: cell division cycle protein 48 homolog [Vitis vinifera]	15.58	16.23	15.53	15.61	16.16	13.58	15.78	15.12
GO:0005618	cell wall	cellular_component	6	0	TRINITY_DN32818_c0_g1	3.13363	up	GLP4	PREDICTED: germin-like protein subfamily 2 member 1 [Tarenaya hassleriana]	21.97	29.75	10.8	4.19	3.22	2.97	20.84	3.46
GO:0005618	cell wall	cellular_component	6	0	TRINITY_DN32841_c0_g2	1.08954	up	LA1	PREDICTED: la protein 1-like [Elaeis guineensis]	23.61	38.99	28	23.23	23.91	25.19	30.2	24.11
GO:0005618	cell wall	cellular_component	6	0	TRINITY_DN32857_c0_g2	1.61362	up	PAE3	unknown [Picea sitchensis]	4.78	9.64	14.6	6.8	4.77	4.7	9.67	5.42
GO:0005618	cell wall	cellular_component	6	0	TRINITY_DN39234_c0_g2	-2.71583	down	EB1C	unknown [Picea sitchensis]	1.36	2.19	0.81	13.62	23.53	19.06	1.45	18.74
GO:0005618	cell wall	cellular_component	6	0	TRINITY_DN39420_c0_g1	2.91265	up	GULLO5	unknown [Picea sitchensis]	3.49	10.7	24.89	2.2	3.25	2.57	13.03	2.67
GO:0005618	cell wall	cellular_component	6	0	TRINITY_DN39507_c2_g1	1.71064	up	HSP70	hypothetical protein PRUPE_ppa002591mg [Prunus persica]	178.13	12.28	10.39	35.71	65.88	44.74	66.93	48.78
GO:0005618	cell wall	cellular_component	6	0	TRINITY_DN39539_c0_g1	-3.45619	down	QRT3	PREDICTED: polygalacturonase QRT3 isoform X1 [Nelumbo nucifera]	0.36	2.34	3.17	31.37	33.9	39.76	1.96	35.01
GO:0005618	cell wall	cellular_component	6	0	TRINITY_DN39553_c1_g1	-1.78426	down	STL2	PREDICTED: uncharacterized protein LOC18440876 [Amborella trichopoda]	2.99	4.82	5.55	22.73	28.42	26.78	4.45	25.98
GO:0005618	cell wall	cellular_component	6	0	TRINITY_DN39591_c1_g1	-1.4777	down	CWINV1	PREDICTED: beta-fructofuranosidase, insoluble isoenzyme CWINV1 isoform X1 [Amborella trichopoda]	0.81	0.07	0.35	1.95	2.14	2.41	0.41	2.17
GO:0005618	cell wall	cellular_component	6	0	TRINITY_DN39603_c1_g3	2.59667	up	GSVIVT00023967001	class III secretory peroxidase [Ginkgo biloba]	5.45	5.67	4.41	3.78	0.55	0.14	5.18	1.49
GO:0005618	cell wall	cellular_component	6	0	TRINITY_DN39603_c1_g4	4.60042	up	PNC1	peroxidase [Picea abies]	13.01	16.06	8.39	1.28	1.4	0.63	12.49	1.1
GO:0005618	cell wall	cellular_component	6	0	TRINITY_DN39763_c0_g5	1.40224	up	ATAD3A	PREDICTED: ATPase family AAA domain-containing protein 3-like [Phoenix dactylifera]	5.92	7.15	7.09	4.65	4.55	4.01	6.72	4.4
GO:0005618	cell wall	cellular_component	6	0	TRINITY_DN39781_c1_g2	-1.86499	down	HSP70-10	predicted protein [Physcomitrella patens]	0	0.2	0.31	1.29	0.62	1.16	0.17	1.02
GO:0005618	cell wall	cellular_component	6	0	TRINITY_DN39830_c2_g3	-5.84551	down	XTH7	PREDICTED: probable xyloglucan endotransglucosylase/hydrolase protein 6 [Brassica oleracea var. oleracea]	0	0	0.25	5.72	8.35	17.13	0.08	10.4
GO:0005618	cell wall	cellular_component	6	0	TRINITY_DN39830_c3_g1	-5.55079	down	XTH7	PREDICTED: LOW QUALITY PROTEIN: uncharacterized protein LOC18438610 [Amborella trichopoda]	0.77	0.99	15.99	331.57	380.59	427.06	5.92	379.74
GO:0005618	cell wall	cellular_component	6	0	TRINITY_DN39957_c1_g2	-2.28001	down	BGAL3	unknown [Picea sitchensis]	0.28	0.26	1.61	11.88	9.08	10.07	0.72	10.34
GO:0005618	cell wall	cellular_component	6	0	TRINITY_DN39957_c2_g2	-3.49746	down	Os03g0165400	unknown [Picea sitchensis]	3.34	6.92	9.11	109	124.28	134.11	6.46	122.46
GO:0005618	cell wall	cellular_component	6	0	TRINITY_DN39960_c1_g4	-9.28185	down	SCE70	heat shock protein 70 [Medicago sativa]	0	0	0	1.59	1.73	2.02	0	1.78
GO:0005618	cell wall	cellular_component	6	0	TRINITY_DN39984_c1_g4	-6.42343	down	Os03g0165400	PREDICTED: uncharacterized protein LOC103634377 [Zea mays]	0.01	0.07	0.02	3.18	6.67	4.93	0.03	4.93
GO:0005618	cell wall	cellular_component	6	0	TRINITY_DN40280_c0_g1	-2.01713	down	TUBA1	alpha tubulin 1 [Pseudotsuga menziesii var. menziesii]	86.53	178.91	316.21	1314.39	1365.97	1263.34	193.88	1314.57
GO:0005618	cell wall	cellular_component	6	0	TRINITY_DN40321_c1_g1	2.08812	up	PAE3	unknown [Picea sitchensis]	6.81	14.77	18.51	7.08	4.33	4.32	13.36	5.24
GO:0005618	cell wall	cellular_component	6	0	TRINITY_DN40602_c0_g1	-2.31635	down	HSP70-3	hypothetical protein TSUD_115680 [Trifolium subterraneum]	0.16	0.95	2.29	7.72	10.74	12.12	1.13	10.19
GO:0005618	cell wall	cellular_component	6	0	TRINITY_DN40602_c1_g2	8.93401	up	HSP70	PREDICTED: heat shock 70 kDa protein-like [Sesamum indicum]	1.06	3.97	16.16	0.05	0	0	7.06	0.02
GO:0005618	cell wall	cellular_component	6	0	TRINITY_DN40620_c0_g1	-1.40605	down	TUBB1	beta tubulin 3 [Hordeum vulgare subsp. vulgare]	4.6	7.02	11.38	21.28	35.59	31.68	7.67	29.52
GO:0005618	cell wall	cellular_component	6	0	TRINITY_DN40620_c0_g3	-1.69101	down	TUBB1	beta-tubulin [Medicago falcata]	20.45	31.98	82.25	240.76	270.98	235.78	44.89	249.17
GO:0005618	cell wall	cellular_component	6	0	TRINITY_DN40624_c0_g2	-8.62773	down	ERL2	hypothetical protein, partial [Cryptomeria japonica]	0	0	0	2.03	1.32	0.73	0	1.36
GO:0005618	cell wall	cellular_component	6	0	TRINITY_DN40815_c0_g2	1.38456	up	SBT4.14	hypothetical protein VITISV_004712 [Vitis vinifera]	0.22	0.6	1.49	0.66	0.52	0.28	0.77	0.49
GO:0005618	cell wall	cellular_component	6	0	TRINITY_DN40902_c0_g2	-3.17779	down	PXC2	unknown [Picea sitchensis]	0.83	0.41	1.63	8.43	13.61	13.89	0.96	11.98
GO:0005618	cell wall	cellular_component	6	0	TRINITY_DN41080_c0_g2	-3.57539	down	RCA	ribulose-1,5-bisphosphate carboxylase/oxygenase activase large isoform [Pinus massoniana]	14.13	45.66	19.82	379.54	531.64	650.14	26.54	520.44
GO:0005618	cell wall	cellular_component	6	0	TRINITY_DN41175_c2_g8	-6.05122	down	MED37E	PREDICTED: heat shock cognate 70 kDa protein-like [Nicotiana tabacum]	0	0	0.09	3.73	5.68	5.32	0.03	4.91
GO:0005618	cell wall	cellular_component	6	0	TRINITY_DN41430_c0_g1	3.99642	up	At4g36180	PREDICTED: probable leucine-rich repeat receptor-like protein kinase At1g35710 [Musa acuminata subsp. malaccensis]	8.96	13.82	12.46	3.14	0.69	0.62	11.75	1.48
GO:0005618	cell wall	cellular_component	6	0	TRINITY_DN41600_c0_g6	-4.2359	down	APS1	PREDICTED: acid phosphatase 1 [Amborella trichopoda]	0.02	0.1	0.41	4.06	5.55	3.53	0.18	4.38
GO:0005618	cell wall	cellular_component	6	0	TRINITY_DN41614_c1_g1	3.11844	up	GSVIVT00023967001	properoxidase [Picea abies]	36.58	35.16	24.12	13.23	3.42	2.78	31.95	6.48
GO:0005618	cell wall	cellular_component	6	0	TRINITY_DN41614_c2_g1	1.63691	up	PNC1	peroxidase [Picea abies]	12.32	37.45	56.58	15.27	22.59	19.57	35.45	19.14
GO:0005618	cell wall	cellular_component	6	0	TRINITY_DN41614_c3_g2	8.6563	up	GSVIVT00023967001	properoxidase [Picea abies]	0.18	1.53	27.15	0.09	0	0	9.62	0.03
GO:0005618	cell wall	cellular_component	6	0	TRINITY_DN41614_c3_g3	5.53736	up	GSVIVT00023967001	peroxidase [Picea abies]	9.71	9.9	41.51	0.89	0.16	1.14	20.37	0.73
GO:0005618	cell wall	cellular_component	6	0	TRINITY_DN41762_c3_g1	-4.27179	down	At5g07830	PREDICTED: heparanase-like protein 2 [Nicotiana attenuata]	0.3	1.66	1.79	34.81	44.51	40.01	1.25	39.78
GO:0005618	cell wall	cellular_component	6	0	TRINITY_DN41793_c0_g3	2.06923	up	SBT3.6	PREDICTED: uncharacterized protein At5g19025 [Amborella trichopoda]	2.75	0.86	0.62	0.49	0.77	0.62	1.41	0.63
GO:0005618	cell wall	cellular_component	6	0	TRINITY_DN41805_c2_g1	-2.51889	down	TUBA1	AT4g14960/dl3520c [Arabidopsis thaliana]	4.62	8.82	21.03	99.53	121.89	121.31	11.49	114.24
GO:0005618	cell wall	cellular_component	6	0	TRINITY_DN41821_c1_g1	-1.98161	down	FH1	PREDICTED: formin-like protein 6 [Nelumbo nucifera]	1.25	4.59	5.25	24.22	23.62	24.06	3.7	23.97
GO:0005618	cell wall	cellular_component	6	0	TRINITY_DN41823_c0_g3	-6.53346	down	GLP4	germin-like protein 2-2-like [Dorcoceras hygrometricum]	0	0.04	0	1.2	3.09	2.15	0.01	2.15
GO:0005618	cell wall	cellular_component	6	0	TRINITY_DN41961_c0_g1	4.31047	up	EXPA8	expansin B, partial [Taxus baccata]	159.57	301.21	765.11	70.58	29.24	38.38	408.63	46.07
GO:0005618	cell wall	cellular_component	6	0	TRINITY_DN41961_c1_g1	-1.92399	down	EXPA15	unknown [Picea sitchensis]	2.29	2.52	3.89	31.43	19.17	16.27	2.9	22.29
GO:0005618	cell wall	cellular_component	6	0	TRINITY_DN41961_c1_g4	-1.07079	down	EXPA15	unknown [Picea sitchensis]	11.95	7.45	12.55	66.78	31.56	22.59	10.65	40.31
GO:0005618	cell wall	cellular_component	6	0	TRINITY_DN42003_c0_g1	-5.57892	down	EXPA8	hypothetical protein EUTSA_v10017120mg [Eutrema salsugineum]	0.24	0.63	5.87	159.83	181.98	217.13	2.25	186.31
GO:0005618	cell wall	cellular_component	6	0	TRINITY_DN42118_c0_g1	2.67748	up	XYL1	hypothetical protein AMTR_s00092p00134420 [Amborella trichopoda]	16.41	23.04	13.91	6.09	6.33	7.56	17.79	6.66
GO:0005618	cell wall	cellular_component	6	0	TRINITY_DN42344_c0_g1	-11.1405	down	SBT1.8	unknown [Picea sitchensis]	0.05	0	0.08	130.52	155.76	167.92	0.04	151.4
GO:0005618	cell wall	cellular_component	6	0	TRINITY_DN42344_c0_g2	-9.54336	down	SBT1.8	SDD1 protein, partial [Cathaya argyrophylla]	0	0	0.59	141.7	192.37	180.6	0.2	171.56
GO:0005618	cell wall	cellular_component	6	0	TRINITY_DN42344_c0_g4	-10.4032	down	SBT1.3	unknown [Picea sitchensis]	0	0	0	5.28	8.32	10.23	0	7.94
GO:0005618	cell wall	cellular_component	6	0	TRINITY_DN42662_c1_g1	-4.3386	down	XTH32	putative xyloglucan endotransglucosylase/hydrolase protein 32 [Ananas comosus]	0.74	3.18	14.21	209.46	184.64	183.91	6.04	192.67
GO:0005618	cell wall	cellular_component	6	0	TRINITY_DN42734_c2_g1	9.02724	up	PNC1	unknown [Picea sitchensis]	40.55	55.11	208.81	0.79	0	0.16	101.49	0.32
GO:0005618	cell wall	cellular_component	6	0	TRINITY_DN42734_c2_g2	10.1276	up	PER52	peroxidase [Picea abies]	22.41	42.41	56.31	0	0	0	40.38	0
GO:0005618	cell wall	cellular_component	6	0	TRINITY_DN42734_c2_g4	9.72152	up	PER52	peroxidase [Picea abies]	5.58	16	70.89	0	0	0	30.82	0
GO:0005618	cell wall	cellular_component	6	0	TRINITY_DN42740_c0_g1	1.19025	up	-	PREDICTED: heat shock 70 kDa protein, mitochondrial isoform X1 [Vitis vinifera]	69.15	81.78	65.59	52.17	56.94	55.21	72.17	54.77
GO:0005618	cell wall	cellular_component	6	0	TRINITY_DN42999_c1_g2	1.11266	up	TPS1	PREDICTED: alpha,alpha-trehalose-phosphate synthase [UDP-forming] 1 [Amborella trichopoda]	3.86	5.49	4.83	3.69	3.52	4.08	4.73	3.76
GO:0005618	cell wall	cellular_component	6	0	TRINITY_DN42999_c1_g3	-1.66576	down	TPS1	PREDICTED: alpha,alpha-trehalose-phosphate synthase [UDP-forming] 1-like isoform X1 [Nelumbo nucifera]	1.79	3.03	2.28	9	13.51	11.32	2.37	11.28
GO:0005618	cell wall	cellular_component	6	0	TRINITY_DN43004_c0_g1	4.53263	up	EXPA8	expansin 1 [Cunninghamia lanceolata]	114.41	267.6	556.8	42.27	14.62	13.21	312.94	23.37
GO:0005618	cell wall	cellular_component	6	0	TRINITY_DN43004_c1_g5	-8.6667	down	EXPA10	expansin 2 [Prunus avium]	0	0.05	0.05	25.16	28.98	30.59	0.03	28.24
GO:0005618	cell wall	cellular_component	6	0	TRINITY_DN43297_c0_g2	-3.89106	down	PNC1	peroxidase [Picea abies]	0	0.5	2.16	26.73	21.31	23.65	0.89	23.9
GO:0005618	cell wall	cellular_component	6	0	TRINITY_DN43297_c1_g1	1.92102	up	GSVIVT00023967001	peroxidase [Picea abies]	22.21	59.3	98.71	22.41	31.22	26.18	60.07	26.6
GO:0005618	cell wall	cellular_component	6	0	TRINITY_DN43297_c1_g2	-10.3726	down	PNC1	peroxidase [Picea abies]	0	0	0	3.06	6.14	5.04	0	4.75
GO:0005618	cell wall	cellular_component	6	0	TRINITY_DN43297_c1_g3	3.97527	up	PNC1	unknown [Picea sitchensis]	11.01	14.21	24.85	5.49	0	0	16.69	1.83
GO:0005618	cell wall	cellular_component	6	0	TRINITY_DN43477_c0_g1	-9.78676	down	SBT3.18	hypothetical protein AMTR_s00004p00071240 [Amborella trichopoda]	0	0.02	0	7.9	12.38	13.87	0.01	11.38
GO:0005618	cell wall	cellular_component	6	0	TRINITY_DN43492_c0_g1	-4.83976	down	XTH31	unknown [Picea sitchensis]	0.21	0.83	5.47	117.27	102.43	89.57	2.17	103.09
GO:0005618	cell wall	cellular_component	6	0	TRINITY_DN43502_c1_g1	-2.47662	down	SBT1.7	SDD1 protein, partial [Picea chihuahuana]	1.75	0.56	0.81	8.33	11.66	12.31	1.04	10.77
GO:0005618	cell wall	cellular_component	6	0	TRINITY_DN43520_c0_g1	-2.52853	down	EXPA1	hypothetical protein 2_4686_01, partial [Pinus taeda]	7.33	7.87	11.88	99.52	95.57	77.34	9.03	90.81
GO:0005618	cell wall	cellular_component	6	0	TRINITY_DN43520_c0_g2	-1.2161	down	EXPA10	PREDICTED: expansin-A8 [Amborella trichopoda]	21.22	12.37	20.57	86.14	55.78	44.16	18.05	62.03
GO:0005618	cell wall	cellular_component	6	0	TRINITY_DN43520_c0_g3	-1.88296	down	EXPA1	PREDICTED: expansin-A1-like [Elaeis guineensis]	2.61	5.89	6.15	28.89	35.18	32.99	4.88	32.35
GO:0005618	cell wall	cellular_component	6	0	TRINITY_DN43600_c0_g1	11.2275	up	GSVIVT00023967001	PREDICTED: cationic peroxidase 1-like [Fragaria vesca subsp. vesca]	10.77	20.82	33.2	0	0	0	21.6	0
GO:0005618	cell wall	cellular_component	6	0	TRINITY_DN43600_c0_g2	7.39958	up	GSVIVT00023967001	PREDICTED: cationic peroxidase 1-like [Nelumbo nucifera]	4.25	12.98	28.61	0.33	0	0	15.28	0.11
GO:0005618	cell wall	cellular_component	6	0	TRINITY_DN43600_c1_g2	-3.94664	down	GSVIVT00023967001	peroxidase [Picea abies]	0.28	0.22	0.44	1.9	13.62	10.04	0.31	8.52
GO:0005618	cell wall	cellular_component	6	0	TRINITY_DN43600_c1_g3	8.17107	up	PER52	class III secretory peroxidase [Ginkgo biloba]	1.72	2.29	11.05	0.05	0	0.03	5.02	0.03
GO:0005618	cell wall	cellular_component	6	0	TRINITY_DN43600_c2_g1	1.11196	up	GSVIVT00023967001	properoxidase [Picea abies]	12.75	58.59	100.75	38.03	40.38	46.63	57.36	41.68
GO:0005618	cell wall	cellular_component	6	0	TRINITY_DN43600_c3_g1	7.1746	up	GSVIVT00023967001	peroxidase [Picea abies]	247.84	279.16	318.62	6.64	2.46	1.06	281.87	3.39
GO:0005618	cell wall	cellular_component	6	0	TRINITY_DN43644_c0_g2	-1.48798	down	SBT1.5	unknown [Picea sitchensis]	21.88	58.27	53.71	203.34	202.1	217.15	44.62	207.53
GO:0005618	cell wall	cellular_component	6	0	TRINITY_DN43747_c0_g1	5.52327	up	INV1	PREDICTED: beta-fructofuranosidase, insoluble isoenzyme CWINV1 isoform X1 [Amborella trichopoda]	24.71	22.27	28.94	1.29	1.15	0.47	25.31	0.97
GO:0005618	cell wall	cellular_component	6	0	TRINITY_DN43886_c0_g1	-1.41763	down	EXPA2	unknown [Picea sitchensis]	4.05	2.36	3.82	25.25	13.89	10.04	3.41	16.39
GO:0005618	cell wall	cellular_component	6	0	TRINITY_DN43886_c0_g2	-1.71238	down	EXPA15	expansin A3 [Pinus radiata]	30.31	29.35	41.46	164.15	128.59	131.76	33.71	141.5
GO:0005618	cell wall	cellular_component	6	0	TRINITY_DN43886_c0_g3	-10.4291	down	EXPA1	unknown [Picea sitchensis]	0	0	0	7.26	4.93	3.97	0	5.39
GO:0005618	cell wall	cellular_component	6	0	TRINITY_DN43886_c0_g4	-8.59941	down	EXPA2	PREDICTED: expansin-A2-like [Elaeis guineensis]	0	0	0.02	5.25	5.19	5.3	0.01	5.25
GO:0005618	cell wall	cellular_component	6	0	TRINITY_DN43971_c1_g6	-5.82405	down	PER49	Peroxidase 49 [Noccaea caerulescens]	0.01	0.07	0.01	2.72	4.06	2.33	0.03	3.04
GO:0005618	cell wall	cellular_component	6	0	TRINITY_DN43988_c1_g1	-10.168	down	GSVIVT00023967001	class III secretory peroxidase [Ginkgo biloba]	0	0	0.11	85.87	50.99	50.4	0.04	62.42
GO:0005618	cell wall	cellular_component	6	0	TRINITY_DN44044_c0_g2	-4.43383	down	SBT1.7	SDD1 protein, partial [Picea schrenkiana]	2.1	1.91	4.32	59.63	111.76	110.09	2.78	93.83
GO:0005618	cell wall	cellular_component	6	0	TRINITY_DN44167_c0_g1	-3.98641	down	SBT1.5	PREDICTED: subtilisin-like protease [Amborella trichopoda]	0.46	1.14	2.48	31.34	36.36	39.58	1.36	35.76
GO:0005618	cell wall	cellular_component	6	0	TRINITY_DN44229_c0_g1	1.845	up	-	PREDICTED: aconitate hydratase, cytoplasmic [Cucumis melo]	130.42	158.83	136.95	76.8	77.61	72.73	142.07	75.71
GO:0005618	cell wall	cellular_component	6	0	TRINITY_DN44270_c0_g1	-6.48376	down	XTH6	hypothetical protein MANES_13G107100 [Manihot esculenta]	1.73	6.87	30.89	1800.58	2062.57	2560.16	13.16	2141.1
GO:0005618	cell wall	cellular_component	6	0	TRINITY_DN44309_c1_g2	-3.92644	down	EXL2	unknown [Picea sitchensis]	2.57	1.34	3.31	59.89	57.67	77.43	2.41	65
GO:0005618	cell wall	cellular_component	6	0	TRINITY_DN44310_c0_g1	-1.25468	down	EXL2	unknown [Picea sitchensis]	1.09	1.73	4.83	10.57	7.94	7.14	2.55	8.55
GO:0005618	cell wall	cellular_component	6	0	TRINITY_DN44445_c0_g1	3.26703	up	Os02g0491600	hypothetical protein AMTR_s00089p00119070 [Amborella trichopoda]	2449.31	1755.22	262.22	223.44	9.96	1.24	1488.92	78.21
GO:0005618	cell wall	cellular_component	6	0	TRINITY_DN44607_c0_g1	1.70006	up	GSVIVT00023967001	peroxidase [Picea abies]	4.61	17.62	101.16	19.43	15.29	16.27	41.13	17
GO:0005618	cell wall	cellular_component	6	0	TRINITY_DN44607_c0_g2	1.15938	up	PNC1	unknown [Picea sitchensis]	1.98	10.75	17.93	6.52	7.45	8.59	10.22	7.52
GO:0005618	cell wall	cellular_component	6	0	TRINITY_DN44607_c0_g3	7.70106	up	PNC1	peroxidase [Picea abies]	346.46	391.05	428.65	7.64	2.04	0.18	388.72	3.29
GO:0005618	cell wall	cellular_component	6	0	TRINITY_DN44607_c0_g5	1.13442	up	GSVIVT00023967001	properoxidase [Picea abies]	16.76	93.62	147.71	57.51	62.85	71.49	86.03	63.95
GO:0005618	cell wall	cellular_component	6	0	TRINITY_DN44640_c0_g5	10.3543	up	PER70	unknown [Picea sitchensis]	320.94	625.05	655.84	0.95	0	0.91	533.94	0.62
GO:0005618	cell wall	cellular_component	6	0	TRINITY_DN44640_c0_g6	-2.44246	down	GSVIVT00023967001	properoxidase [Picea abies]	2.54	4.13	8.82	32.9	55.29	55.25	5.16	47.81
GO:0005618	cell wall	cellular_component	6	0	TRINITY_DN44654_c0_g1	10.096	up	PNC1	PREDICTED: cationic peroxidase 1-like [Ipomoea nil]	0.86	4.35	76.87	0	0	0.09	27.36	0.03
GO:0005618	cell wall	cellular_component	6	0	TRINITY_DN44654_c1_g1	-1.51047	down	PNC1	unknown [Picea sitchensis]	0.94	1.34	1.61	10.51	7.33	1.69	1.3	6.51
GO:0005618	cell wall	cellular_component	6	0	TRINITY_DN44654_c2_g1	9.34728	up	PNC1	peroxidase [Picea abies]	20.17	37.06	77.88	0.09	0	0.26	45.04	0.12
GO:0005618	cell wall	cellular_component	6	0	TRINITY_DN44654_c2_g2	10.6065	up	GSVIVT00023967001	Peroxidase 4 [Ananas comosus]	9.69	33.12	106.25	0	0	0	49.69	0
GO:0005618	cell wall	cellular_component	6	0	TRINITY_DN44675_c0_g1	1.71298	up	GULLO5	unknown [Picea sitchensis]	22.54	22.34	18.54	10.78	13.07	11.43	21.14	11.76
GO:0005618	cell wall	cellular_component	6	0	TRINITY_DN44700_c1_g2	6.16883	up	EP1	unknown [Picea sitchensis]	39.89	19.08	77.69	1.09	0.98	0.99	45.55	1.02
GO:0005618	cell wall	cellular_component	6	0	TRINITY_DN44700_c1_g4	6.67066	up	EP1	unknown [Picea sitchensis]	135.02	59.05	67.48	1.13	1.48	2.11	87.18	1.57
GO:0005618	cell wall	cellular_component	6	0	TRINITY_DN44704_c1_g9	4.83703	up	ASE1	unknown [Picea sitchensis]	1.73	1.42	1.35	0.11	0.04	0.12	1.5	0.09
GO:0005618	cell wall	cellular_component	6	0	TRINITY_DN44849_c0_g1	1.16948	up	APX1	putative ascorbate peroxidase [Cryptomeria japonica]	656.37	872.7	802.47	520.06	543.52	541.82	777.18	535.13
GO:0005618	cell wall	cellular_component	6	0	TRINITY_DN44873_c2_g1	-3.78619	down	At5g07830	PREDICTED: heparanase-like protein 1 [Nelumbo nucifera]	0.69	2.12	2.43	34.37	44.78	40.45	1.75	39.87
GO:0005618	cell wall	cellular_component	6	0	TRINITY_DN45145_c0_g1	1.13787	up	PAP2	Purple acid phosphatase 2 [Anthurium amnicola]	2.34	4.73	11.14	4.33	5.49	3.89	6.07	4.57
GO:0005618	cell wall	cellular_component	6	0	TRINITY_DN45202_c1_g1	-4.08513	down	XTH30	xyloglucan endotransglucosylase-hydrolase XTH5 [Solanum lycopersicum]	0.66	1.83	0.66	35.15	53.28	51.08	1.05	46.5
GO:0005618	cell wall	cellular_component	6	0	TRINITY_DN45399_c1_g1	2.44871	up	HSP70	PREDICTED: heat shock cognate 70 kDa protein 2-like [Phoenix dactylifera]	237.42	15.83	12.38	26.92	37.97	33.87	88.54	32.92
GO:0005618	cell wall	cellular_component	6	0	TRINITY_DN45799_c0_g1	-3.72127	down	SBT1.2	SDD1 protein, partial [Pinus thunbergii]	0.64	0.75	0.35	13.64	16.25	10.23	0.58	13.37
GO:0005618	cell wall	cellular_component	6	0	TRINITY_DN45799_c1_g3	-5.44824	down	SBT1.3	unknown [Picea sitchensis]	0.11	0.27	0.26	14.3	16.2	15.33	0.21	15.28
GO:0005618	cell wall	cellular_component	6	0	TRINITY_DN45799_c1_g5	-12.0218	down	SBT1.4	SDD1 protein, partial [Picea chihuahuana]	0	0	0	17.33	16.71	18.92	0	17.65
GO:0005618	cell wall	cellular_component	6	0	TRINITY_DN45799_c1_g6	-6.16841	down	Glyma18g48580	SDD1 protein, partial [Cathaya argyrophylla]	0	0.38	0.36	19.76	39.89	53.56	0.25	37.74
GO:0005618	cell wall	cellular_component	6	0	TRINITY_DN45890_c0_g1	-1.85343	down	XTH8	unknown [Picea sitchensis]	34.4	95.88	595.53	1508.63	1779.23	1733.67	241.94	1673.84
GO:0005618	cell wall	cellular_component	6	0	TRINITY_DN46085_c1_g1	-9.43774	down	SBT1.2	hypothetical protein TanjilG_32241 [Lupinus angustifolius]	0	0	0	7.91	8.29	12.54	0	9.58
GO:0005618	cell wall	cellular_component	6	0	TRINITY_DN46085_c1_g3	-8.90972	down	SBT1.7	unnamed protein product, partial [Vitis vinifera]	0.29	0	0.03	28.86	27.92	39.19	0.11	31.99
GO:0005618	cell wall	cellular_component	6	0	TRINITY_DN46085_c1_g5	-8.33067	down	SBT1.7	unknown [Picea sitchensis]	0	0	0.02	4.8	4.67	9.24	0.01	6.24
GO:0005618	cell wall	cellular_component	6	0	TRINITY_DN46266_c0_g1	-1.35994	down	-	pollen major allergen No.121 isoform 1 [Cryptomeria japonica]	7.66	8.92	29.19	85.31	62.02	44.66	15.26	64
GO:0005618	cell wall	cellular_component	6	0	TRINITY_DN46283_c1_g1	-3.07918	down	SBT1.5	unknown [Picea sitchensis]	9.05	16.66	14.06	74.05	126.17	124.81	13.26	108.34
GO:0005618	cell wall	cellular_component	6	0	TRINITY_DN46451_c0_g1	-2.28638	down	METK2	RecName: Full=S-adenosylmethionine synthase 2; Short=AdoMet synthase 2; AltName: Full=Methionine adenosyltransferase 2; Short=MAT 2	72.45	102.75	177.71	809.89	1097.38	978.16	117.64	961.81
GO:0005618	cell wall	cellular_component	6	0	TRINITY_DN46491_c0_g2	1.28808	up	CS	unknown [Picea sitchensis]	92.38	116.66	89.18	48.41	54	57.19	99.41	53.2
GO:0005618	cell wall	cellular_component	6	0	TRINITY_DN46556_c2_g4	3.47279	up	PNC1	hypothetical protein JCGZ_00380 [Jatropha curcas]	28.86	26.81	16.07	7.59	2.09	2.12	23.91	3.93
GO:0005618	cell wall	cellular_component	6	0	TRINITY_DN46621_c1_g2	-2.5801	down	-	unknown [Picea sitchensis]	0.06	0.28	0.74	3.89	3.38	3.71	0.36	3.66
GO:0005618	cell wall	cellular_component	6	0	TRINITY_DN46621_c2_g1	-3.78524	down	-	unknown [Picea sitchensis]	4.47	9.11	13.17	190.66	215.32	215.32	8.92	207.1
GO:0005618	cell wall	cellular_component	6	0	TRINITY_DN46719_c1_g1	6.70472	up	HSP70	PREDICTED: heat shock cognate 70 kDa protein [Nicotiana tomentosiformis]	40.68	74.99	143.86	0.68	0.35	0.57	86.51	0.53
GO:0005618	cell wall	cellular_component	6	0	TRINITY_DN46907_c0_g1	1.45124	up	HSP70	PREDICTED: heat shock 70 kDa protein isoform X1 [Malus domestica]	24.92	25.32	24.18	20.39	21.24	20	24.81	20.54
GO:0005618	cell wall	cellular_component	6	0	TRINITY_DN46907_c0_g2	1.80488	up	HSP70	heat shock cognate 70 kDa protein 2-like [Malus domestica]	16.45	21.61	25.11	15.26	14.04	16.01	21.06	15.1
GO:0005618	cell wall	cellular_component	6	0	TRINITY_DN46908_c2_g2	5.87977	up	RLP12	hypothetical protein MANES_10G092900 [Manihot esculenta]	1.45	2.65	0.81	0.06	0	0.06	1.64	0.04
GO:0005618	cell wall	cellular_component	6	0	TRINITY_DN46912_c0_g1	-6.16203	down	SBT3.18	hypothetical protein AMTR_s00004p00071240 [Amborella trichopoda]	0.04	0.14	0.06	8.64	15.76	14.32	0.08	12.91
GO:0005618	cell wall	cellular_component	6	0	TRINITY_DN46912_c0_g6	-8.68516	down	SBT3.18	PREDICTED: subtilisin-like protease SBT3.9 isoform X1 [Nelumbo nucifera]	0	0	0	4.49	5.75	5.18	0	5.14
GO:0005618	cell wall	cellular_component	6	0	TRINITY_DN46958_c1_g1	1.45843	up	HSP70-5	heat shock protein, partial [Botryococcus braunii]	4.42	4.57	2.87	2.58	2.32	2.7	3.95	2.53
GO:0005618	cell wall	cellular_component	6	0	TRINITY_DN47032_c1_g1	-1.03512	down	SBT1.7	unknown [Picea sitchensis]	57	101.87	140.85	302.92	310.15	415.69	99.91	342.92
GO:0005618	cell wall	cellular_component	6	0	TRINITY_DN47032_c1_g2	2.97051	up	SBT1.4	unknown [Picea sitchensis]	15.7	8.68	5.69	5.17	0.95	0.88	10.02	2.33
GO:0005618	cell wall	cellular_component	6	0	TRINITY_DN47178_c0_g2	1.00329	up	EXL2	unknown [Picea sitchensis]	88.66	52.23	89.2	67.25	93.86	55.27	76.7	72.13
GO:0005618	cell wall	cellular_component	6	0	TRINITY_DN47202_c2_g2	1.77565	up	XYL2	predicted protein [Physcomitrella patens]	3.01	6.35	8.36	2.63	3.42	2.7	5.91	2.92
GO:0005618	cell wall	cellular_component	6	0	TRINITY_DN47231_c0_g1	-2.99342	down	PAE3	unknown [Picea sitchensis]	0.3	1.07	5.76	29.6	32.62	32.55	2.38	31.59
GO:0005618	cell wall	cellular_component	6	0	TRINITY_DN47233_c1_g3	-1.50757	down	Os03g0255100	unknown [Picea sitchensis]	0.84	1.35	0.62	6	4.2	3.47	0.94	4.56
GO:0005618	cell wall	cellular_component	6	0	TRINITY_DN49160_c0_g1	-8.49808	down	GER4	germin-like protein [Pinus taeda]	0	0	0.02	2.67	6.91	6.98	0.01	5.52
GO:0005618	cell wall	cellular_component	6	0	TRINITY_DN7652_c0_g1	5.07624	up	-	unknown [Picea sitchensis]	1.28	0.98	0.45	0.06	0.04	0.03	0.9	0.04
GO:0004674	protein serine/threonine kinase activity	molecular_function	8	0	TRINITY_DN33497_c0_g1	1.25002	up	LECRKS5	PREDICTED: probable L-type lectin-domain containing receptor kinase S.5 [Prunus mume]	5.12	6.45	9.75	4.72	6.24	4.37	7.11	5.11
GO:0004674	protein serine/threonine kinase activity	molecular_function	8	0	TRINITY_DN33512_c0_g1	-1.64196	down	PBL7	hypothetical protein AXG93_421s1190 [Marchantia polymorpha subsp. polymorpha]	0.53	2.89	0.21	3.46	5.24	6.01	1.21	4.9
GO:0004674	protein serine/threonine kinase activity	molecular_function	8	0	TRINITY_DN33654_c0_g1	-4.49779	down	At1g68400	hypothetical protein MANES_14G105500 [Manihot esculenta]	0.03	0.32	0.35	12.33	7.58	6.3	0.23	8.74
GO:0004674	protein serine/threonine kinase activity	molecular_function	8	0	TRINITY_DN33660_c1_g2	10.8658	up	SLSG	PREDICTED: LOW QUALITY PROTEIN: G-type lectin S-receptor-like serine/threonine-protein kinase SD2-5 [Phoenix dactylifera]	453.76	140.16	153.42	0.59	0.08	0.07	249.11	0.25
GO:0004674	protein serine/threonine kinase activity	molecular_function	8	0	TRINITY_DN33661_c0_g2	-1.33448	down	At1g54610	PREDICTED: probable serine/threonine-protein kinase At1g54610 [Amborella trichopoda]	2.62	4.08	5.44	14.23	19.87	17.77	4.05	17.29
GO:0004674	protein serine/threonine kinase activity	molecular_function	8	0	TRINITY_DN33755_c0_g6	-1.64053	down	BAM1	hypothetical protein CARUB_v10025808mg [Capsella rubella]	2.25	3.12	3.51	15.49	15.02	16.85	2.96	15.79
GO:0004674	protein serine/threonine kinase activity	molecular_function	8	0	TRINITY_DN33885_c0_g1	-2.20938	down	PXC2	PREDICTED: probable LRR receptor-like serine/threonine-protein kinase IRK [Nelumbo nucifera]	1.65	2.61	2.78	16.51	20.73	19.08	2.35	18.77
GO:0004674	protein serine/threonine kinase activity	molecular_function	8	0	TRINITY_DN33887_c0_g1	-1.30763	down	At5g63930	PREDICTED: probable leucine-rich repeat receptor-like protein kinase At5g63930 [Beta vulgaris subsp. vulgaris]	1.07	0.92	0.33	3.56	2.93	3.72	0.77	3.4
GO:0004674	protein serine/threonine kinase activity	molecular_function	8	0	TRINITY_DN33957_c0_g1	2.59466	up	SD17	unknown [Picea sitchensis]	7.16	3.51	3.21	1.41	1.41	1.38	4.63	1.4
GO:0004674	protein serine/threonine kinase activity	molecular_function	8	0	TRINITY_DN34056_c1_g1	-1.34185	down	HVA22F	unknown [Picea sitchensis]	3.1	3.46	2.64	14.06	14.9	10.69	3.07	13.22
GO:0004674	protein serine/threonine kinase activity	molecular_function	8	0	TRINITY_DN34093_c1_g4	1.61476	up	LECRK91	PREDICTED: L-type lectin-domain containing receptor kinase IX.1 [Amborella trichopoda]	0.4	0.98	0.84	0.48	0.47	0.26	0.74	0.4
GO:0004674	protein serine/threonine kinase activity	molecular_function	8	0	TRINITY_DN34206_c2_g2	-2.77171	down	At1g60630	hypothetical protein AMTR_s00051p00133340 [Amborella trichopoda]	0.29	1.77	9.21	38.94	41.45	45.84	3.76	42.08
GO:0004674	protein serine/threonine kinase activity	molecular_function	8	0	TRINITY_DN34268_c0_g1	-2.52257	down	PXC1	PREDICTED: leucine-rich repeat receptor-like protein kinase PXC1 [Vitis vinifera]	4.1	7.59	7.35	52.14	70.73	63.94	6.35	62.27
GO:0004674	protein serine/threonine kinase activity	molecular_function	8	0	TRINITY_DN34286_c0_g4	1.26193	up	CIPK5	unknown [Picea sitchensis]	8.15	17.47	18.79	9.48	11.02	10.47	14.8	10.32
GO:0004674	protein serine/threonine kinase activity	molecular_function	8	0	TRINITY_DN34286_c0_g5	-1.91472	down	CIPK5	unknown [Picea sitchensis]	0.12	0.2	0.26	1.09	1.33	1.26	0.19	1.23
GO:0004674	protein serine/threonine kinase activity	molecular_function	8	0	TRINITY_DN34387_c1_g1	-2.02694	down	LECRK59	unknown [Picea sitchensis]	0.33	0.53	0.37	3.56	4.8	4.11	0.41	4.16
GO:0004674	protein serine/threonine kinase activity	molecular_function	8	0	TRINITY_DN34464_c1_g1	-1.48981	down	At2g24130	hypothetical protein TanjilG_12793 [Lupinus angustifolius]	1.17	2.66	2.68	15.3	10.23	11.39	2.17	12.31
GO:0004674	protein serine/threonine kinase activity	molecular_function	8	0	TRINITY_DN34484_c0_g1	-5.8477	down	PBL7	hypothetical protein AXG93_421s1190 [Marchantia polymorpha subsp. polymorpha]	0.07	0.07	0.08	5.16	5.94	8.81	0.07	6.64
GO:0004674	protein serine/threonine kinase activity	molecular_function	8	0	TRINITY_DN34629_c0_g1	-1.89464	down	LHW	PREDICTED: transcription factor LHW-like [Nicotiana tomentosiformis]	0.83	0.79	0.32	3.77	4.86	4.16	0.65	4.26
GO:0004674	protein serine/threonine kinase activity	molecular_function	8	0	TRINITY_DN34665_c1_g2	3.8951	up	HSL1	hypothetical protein MIMGU_mgv1a000813mg [Erythranthe guttata]	33.82	36.42	11	4.7	4.01	0.95	27.08	3.22
GO:0004674	protein serine/threonine kinase activity	molecular_function	8	0	TRINITY_DN34750_c1_g1	-2.39038	down	SLSG	PREDICTED: G-type lectin S-receptor-like serine/threonine-protein kinase B120 [Daucus carota subsp. sativus]	0.59	1.02	2.51	16.45	9.14	13.71	1.37	13.1
GO:0004674	protein serine/threonine kinase activity	molecular_function	8	0	TRINITY_DN34796_c1_g2	-5.12932	down	LRK10L-1.4	PREDICTED: LEAF RUST 10 DISEASE-RESISTANCE LOCUS RECEPTOR-LIKE PROTEIN KINASE-like 1.1 [Musa acuminata subsp. malaccensis]	0.04	0.04	0	2.08	1.28	1.41	0.03	1.59
GO:0004674	protein serine/threonine kinase activity	molecular_function	8	0	TRINITY_DN34908_c0_g1	-3.77812	down	At1g68400	PREDICTED: probable leucine-rich repeat receptor-like protein kinase At1g68400 [Cucumis melo]	0.69	1.59	0.32	16.59	22.24	21.22	0.87	20.02
GO:0004674	protein serine/threonine kinase activity	molecular_function	8	0	TRINITY_DN34949_c1_g1	7.06328	up	WAKL20	PREDICTED: wall-associated receptor kinase-like 20 [Nelumbo nucifera]	5.47	5.3	3.04	0.19	0.11	0.06	4.6	0.12
GO:0004674	protein serine/threonine kinase activity	molecular_function	8	0	TRINITY_DN34949_c1_g3	4.62812	up	WAKL20	hypothetical protein CICLE_v10030949mg [Citrus clementina]	15.2	7.59	5.87	0.68	0.53	0.59	9.55	0.6
GO:0004674	protein serine/threonine kinase activity	molecular_function	8	0	TRINITY_DN35022_c0_g1	-2.58709	down	PXC3	unknown [Picea sitchensis]	0.7	0.94	0.83	9.64	11.51	9.57	0.82	10.24
GO:0004674	protein serine/threonine kinase activity	molecular_function	8	0	TRINITY_DN35223_c1_g1	-1.40073	down	At1g52310	unknown [Picea sitchensis]	0.78	1.17	1.39	5.36	4.97	4.83	1.11	5.05
GO:0004674	protein serine/threonine kinase activity	molecular_function	8	0	TRINITY_DN35314_c0_g4	-1.00403	down	ASK5	unknown [Picea sitchensis]	9.4	10.96	7.21	25.64	25.57	27.09	9.19	26.1
GO:0004674	protein serine/threonine kinase activity	molecular_function	8	0	TRINITY_DN35357_c1_g1	2.09309	up	HSL1	PREDICTED: receptor-like protein kinase HSL1 [Phoenix dactylifera]	25.29	22.91	16.17	10.19	8.06	8.38	21.46	8.88
GO:0004674	protein serine/threonine kinase activity	molecular_function	8	0	TRINITY_DN35398_c1_g2	3.27375	up	LECRK16	PREDICTED: receptor-like protein kinase HSL1 [Jatropha curcas]	64.22	40.06	8.64	13.51	12.09	11.81	37.64	12.47
GO:0004674	protein serine/threonine kinase activity	molecular_function	8	0	TRINITY_DN35503_c1_g1	-3.05218	down	EMS1	hypothetical protein SELMODRAFT_431458 [Selaginella moellendorffii]	0.1	0.48	0.28	4.46	3.97	3.3	0.29	3.91
GO:0004674	protein serine/threonine kinase activity	molecular_function	8	0	TRINITY_DN35503_c2_g1	-3.0354	down	At3g47110	hypothetical protein OsJ_34308 [Oryza sativa Japonica Group]	0.31	0.62	0.51	4.2	5.61	4.79	0.48	4.87
GO:0004674	protein serine/threonine kinase activity	molecular_function	8	0	TRINITY_DN35503_c2_g3	-2.97361	down	At3g47110	PREDICTED: LRR receptor-like serine/threonine-protein kinase EFR [Elaeis guineensis]	0.03	0.51	0.94	6.4	7.51	5.45	0.49	6.45
GO:0004674	protein serine/threonine kinase activity	molecular_function	8	0	TRINITY_DN35512_c0_g1	-2.32548	down	At2g42960	putative receptor-like protein kinase [Morus notabilis]	2.34	4.14	5.29	26.25	37.34	34.93	3.92	32.84
GO:0004674	protein serine/threonine kinase activity	molecular_function	8	0	TRINITY_DN35572_c0_g1	1.41734	up	At5g65240	unknown [Picea sitchensis]	23.44	27.45	23.11	17.73	15.49	15.13	24.67	16.12
GO:0004674	protein serine/threonine kinase activity	molecular_function	8	0	TRINITY_DN35589_c0_g1	-4.88961	down	LECRKS4	unknown [Picea sitchensis]	0.14	0.05	0	3.2	3.94	3.5	0.06	3.55
GO:0004674	protein serine/threonine kinase activity	molecular_function	8	0	TRINITY_DN35589_c2_g2	2.14015	up	LECRK41	unknown [Picea sitchensis]	3.06	4.24	3.21	1.61	1.21	1.27	3.5	1.36
GO:0004674	protein serine/threonine kinase activity	molecular_function	8	0	TRINITY_DN35589_c2_g3	1.6746	up	LECRK41	unknown [Picea sitchensis]	6.73	8.85	7.5	5.64	3.47	3.31	7.69	4.14
GO:0004674	protein serine/threonine kinase activity	molecular_function	8	0	TRINITY_DN35689_c0_g1	-1.85234	down	-	PREDICTED: systemin receptor SR160-like [Nelumbo nucifera]	0.64	2.11	2.2	8.38	10.05	10.94	1.65	9.79
GO:0004674	protein serine/threonine kinase activity	molecular_function	8	0	TRINITY_DN35801_c2_g4	-2.58276	down	THE1	PREDICTED: receptor-like protein kinase THESEUS 1 [Eucalyptus grandis]	0.55	0.82	0.52	6.05	7.14	6.06	0.63	6.42
GO:0004674	protein serine/threonine kinase activity	molecular_function	8	0	TRINITY_DN35834_c2_g1	1.14035	up	At5g10290	unknown [Picea sitchensis]	25.38	33.56	25.84	24.29	21.41	20.59	28.26	22.1
GO:0004674	protein serine/threonine kinase activity	molecular_function	8	0	TRINITY_DN35883_c1_g1	-9.10857	down	RCH1	receptor protein kinase [Pinus sylvestris]	0.02	0.02	0.01	12.09	18.12	18.53	0.02	16.25
GO:0004674	protein serine/threonine kinase activity	molecular_function	8	0	TRINITY_DN35938_c0_g1	2.59051	up	At1g74360	hypothetical protein AXG93_2351s1050 [Marchantia polymorpha subsp. polymorpha]	2.7	1.43	0.72	0.48	0.48	0.52	1.62	0.49
GO:0004674	protein serine/threonine kinase activity	molecular_function	8	0	TRINITY_DN35938_c0_g2	2.10089	up	RCH1	hypothetical protein CICLE_v10026978mg [Citrus clementina]	1.78	2.02	1.19	0.95	0.78	0.26	1.66	0.66
GO:0004674	protein serine/threonine kinase activity	molecular_function	8	0	TRINITY_DN36098_c0_g2	3.38861	up	SD25	PREDICTED: G-type lectin S-receptor-like serine/threonine-protein kinase SD2-5 [Fragaria vesca subsp. vesca]	20.62	11.62	10.22	3.5	2.93	1.08	14.15	2.5
GO:0004674	protein serine/threonine kinase activity	molecular_function	8	0	TRINITY_DN36111_c0_g3	1.65259	up	CURL3	Receptor-like protein kinase HSL1 [Noccaea caerulescens]	5.9	10.08	10.81	4.77	4.73	4.92	8.93	4.81
GO:0004674	protein serine/threonine kinase activity	molecular_function	8	0	TRINITY_DN36111_c0_g5	-4.02798	down	GSO1	clavata 1-like protein [Pinus pinaster]	0	0.16	0	3.09	2.15	1.89	0.05	2.38
GO:0004674	protein serine/threonine kinase activity	molecular_function	8	0	TRINITY_DN36147_c0_g1	-3.63941	down	CR4	PREDICTED: serine/threonine-protein kinase-like protein ACR4 [Prunus mume]	0.04	0.11	0.11	1.78	1.88	1.86	0.09	1.84
GO:0004674	protein serine/threonine kinase activity	molecular_function	8	0	TRINITY_DN36169_c1_g2	2.09878	up	LRK10L-1.2	PREDICTED: probable serine/threonine-protein kinase At1g18390 [Erythranthe guttata]	15.76	11.52	6.21	7.83	4.18	2.6	11.16	4.87
GO:0004674	protein serine/threonine kinase activity	molecular_function	8	0	TRINITY_DN36232_c0_g1	3.18678	up	-	PREDICTED: LOW QUALITY PROTEIN: uncharacterized protein LOC105048149 [Elaeis guineensis]	11.79	8.64	5.3	2.41	1.7	2	8.58	2.04
GO:0004674	protein serine/threonine kinase activity	molecular_function	8	0	TRINITY_DN36283_c2_g8	-8.25968	down	CRK6	PREDICTED: cysteine-rich receptor-like protein kinase 10 isoform X1 [Gossypium raimondii]	0	0	0	3.91	4.55	4.77	0	4.41
GO:0004674	protein serine/threonine kinase activity	molecular_function	8	0	TRINITY_DN36288_c1_g3	-8.39532	down	FLS2	hypothetical protein [Cryptomeria japonica]	0	0	0	5.94	3.78	9.48	0	6.4
GO:0004674	protein serine/threonine kinase activity	molecular_function	8	0	TRINITY_DN36288_c1_g4	-5.50338	down	At1g51810	PREDICTED: probable LRR receptor-like serine/threonine-protein kinase At3g47570 [Solanum pennellii]	0	0.13	0.04	3.71	5.2	5.63	0.06	4.85
GO:0004674	protein serine/threonine kinase activity	molecular_function	8	0	TRINITY_DN36299_c0_g2	-10.4226	down	LECRK82	PREDICTED: L-type lectin-domain containing receptor kinase IX.1-like [Glycine max]	0	0	0	4.24	3.6	4.49	0	4.11
GO:0004674	protein serine/threonine kinase activity	molecular_function	8	0	TRINITY_DN36305_c0_g1	3.07789	up	CRK1	PREDICTED: G-type lectin S-receptor-like serine/threonine-protein kinase SD2-5 [Vitis vinifera]	14.45	10.73	7.05	3.1	2.05	1.8	10.74	2.32
GO:0004674	protein serine/threonine kinase activity	molecular_function	8	0	TRINITY_DN36319_c0_g1	-1.48353	down	LECRK91	PREDICTED: L-type lectin-domain containing receptor kinase IX.1-like [Daucus carota subsp. sativus]	0.9	1.89	2.07	7.48	7.63	8.26	1.62	7.79
GO:0004674	protein serine/threonine kinase activity	molecular_function	8	0	TRINITY_DN36319_c0_g2	-10.1165	down	LECRK91	PREDICTED: LOW QUALITY PROTEIN: L-type lectin-domain containing receptor kinase IX.1-like [Oryza brachyantha]	0	0	0	5.74	6.45	6.08	0	6.09
GO:0004674	protein serine/threonine kinase activity	molecular_function	8	0	TRINITY_DN36320_c0_g1	-2.28824	down	At1g80870	PREDICTED: putative receptor-like protein kinase At1g80870 [Nelumbo nucifera]	0.76	2.64	4.34	19.37	21.44	21.23	2.58	20.68
GO:0004674	protein serine/threonine kinase activity	molecular_function	8	0	TRINITY_DN36365_c1_g2	2.71416	up	GSO1	PREDICTED: LRR receptor-like serine/threonine-protein kinase GSO1 [Amborella trichopoda]	0.34	1.27	0.45	0.16	0.15	0.2	0.69	0.17
GO:0004674	protein serine/threonine kinase activity	molecular_function	8	0	TRINITY_DN36390_c2_g2	-7.84585	down	MIK1	PREDICTED: MDIS1-interacting receptor like kinase 1 [Theobroma cacao]	0.01	0.01	0	2	2.26	2.84	0.01	2.37
GO:0004674	protein serine/threonine kinase activity	molecular_function	8	0	TRINITY_DN36401_c1_g1	1.35502	up	MSP1	PREDICTED: probable LRR receptor-like serine/threonine-protein kinase At3g47570 [Nelumbo nucifera]	3.94	2.54	1.89	2.77	1.59	1.84	2.79	2.07
GO:0004674	protein serine/threonine kinase activity	molecular_function	8	0	TRINITY_DN36433_c1_g2	3.87038	up	At2g19130	PREDICTED: G-type lectin S-receptor-like serine/threonine-protein kinase At2g19130 [Nelumbo nucifera]	13.42	23.58	16.76	4.84	0.72	0.59	17.92	2.05
GO:0004674	protein serine/threonine kinase activity	molecular_function	8	0	TRINITY_DN36680_c0_g1	1.98144	up	EFR	hypothetical protein JCGZ_25034 [Jatropha curcas]	1.16	2.42	1.19	0.83	0.61	0.58	1.59	0.67
GO:0004674	protein serine/threonine kinase activity	molecular_function	8	0	TRINITY_DN36729_c5_g2	-3.65345	down	-	Retrotransposon, unclassified-like protein [Theobroma cacao]	0.04	0.06	0.05	1.2	0.95	1.09	0.05	1.08
GO:0004674	protein serine/threonine kinase activity	molecular_function	8	0	TRINITY_DN36730_c0_g2	2.38187	up	CRK10	PREDICTED: putative receptor-like protein kinase At4g00960 isoform X1 [Vigna angularis]	1.56	2.82	3.76	0.65	2.92	0.25	2.71	1.27
GO:0004674	protein serine/threonine kinase activity	molecular_function	8	0	TRINITY_DN36761_c0_g3	-2.58526	down	RCH1	PREDICTED: probable LRR receptor-like serine/threonine-protein kinase At1g34110 [Amborella trichopoda]	0.21	0.41	0.56	3.95	3.59	4.33	0.39	3.96
GO:0004674	protein serine/threonine kinase activity	molecular_function	8	0	TRINITY_DN36793_c0_g3	2.33868	up	PBL10	Protein kinase APK1A, chloroplastic, partial [Anthurium amnicola]	17.96	18.31	8.86	4.81	5.79	5.87	15.04	5.49
GO:0004674	protein serine/threonine kinase activity	molecular_function	8	0	TRINITY_DN36964_c0_g1	1.13127	up	splA	unknown [Picea sitchensis]	9	12.01	11.48	7.16	9.09	9.21	10.83	8.49
GO:0004674	protein serine/threonine kinase activity	molecular_function	8	0	TRINITY_DN37095_c1_g1	-3.44255	down	At3g03770	PREDICTED: probable inactive leucine-rich repeat receptor-like protein kinase At3g03770 [Amborella trichopoda]	0.01	0.1	0.11	0.82	1.67	1.54	0.07	1.34
GO:0004674	protein serine/threonine kinase activity	molecular_function	8	0	TRINITY_DN37148_c0_g3	-2.12395	down	-	Bulb-type lectin domain-containing protein [Cynara cardunculus var. scolymus]	8.98	11.13	10.3	72.34	72.94	67.18	10.14	70.82
GO:0004674	protein serine/threonine kinase activity	molecular_function	8	0	TRINITY_DN37168_c0_g1	1.0641	up	PSKR2	hypothetical protein AMTR_s00160p00017250 [Amborella trichopoda]	6.1	10.31	9.25	8.31	6.17	6.24	8.55	6.91
GO:0004674	protein serine/threonine kinase activity	molecular_function	8	0	TRINITY_DN37168_c0_g2	1.09585	up	PSKR2	hypothetical protein AMTR_s00160p00017250 [Amborella trichopoda]	4.24	5.9	2.05	3.35	3.1	3.39	4.06	3.28
GO:0004674	protein serine/threonine kinase activity	molecular_function	8	0	TRINITY_DN37237_c1_g1	-2.80587	down	GSO2	hypothetical protein MANES_10G137800 [Manihot esculenta]	0.99	3.34	1.78	16.56	22.3	22.11	2.04	20.32
GO:0004674	protein serine/threonine kinase activity	molecular_function	8	0	TRINITY_DN37301_c0_g1	-1.62971	down	At2g26730	unknown [Picea sitchensis]	7.1	11.61	17.77	54.73	71.95	63.64	12.16	63.44
GO:0004674	protein serine/threonine kinase activity	molecular_function	8	0	TRINITY_DN37309_c0_g1	4.04631	up	FLS2	LRR receptor-like serine/threonine-protein kinase FLS2, partial [Anthurium amnicola]	8.61	6.14	0.86	0.55	0.98	0.2	5.2	0.58
GO:0004674	protein serine/threonine kinase activity	molecular_function	8	0	TRINITY_DN37309_c0_g2	3.32157	up	FLS2	PREDICTED: LRR receptor-like serine/threonine-protein kinase FLS2 isoform X1 [Malus domestica]	12.07	8.87	1.98	1.47	2.28	0.47	7.64	1.41
GO:0004674	protein serine/threonine kinase activity	molecular_function	8	0	TRINITY_DN37339_c0_g4	3.58422	up	At5g45780	Armadillo [Cynara cardunculus var. scolymus]	64.45	37.43	7.8	6.96	5.16	4.9	36.56	5.67
GO:0004674	protein serine/threonine kinase activity	molecular_function	8	0	TRINITY_DN37341_c0_g2	-6.97338	down	At2g24130	PREDICTED: probable LRR receptor-like serine/threonine-protein kinase At3g47570 [Nelumbo nucifera]	0	0.03	0	2.13	1.96	3.07	0.01	2.39
GO:0004674	protein serine/threonine kinase activity	molecular_function	8	0	TRINITY_DN37353_c0_g1	-1.47425	down	BRL2	PREDICTED: serine/threonine-protein kinase BRI1-like 2 [Nelumbo nucifera]	1.22	4.3	1.8	10.3	10.86	12.28	2.44	11.15
GO:0004674	protein serine/threonine kinase activity	molecular_function	8	0	TRINITY_DN37374_c0_g1	-1.05363	down	LECRK81	hypothetical protein GLYMA_14G211200 [Glycine max]	1.43	2.69	3.65	9.34	7.63	10.86	2.59	9.28
GO:0004674	protein serine/threonine kinase activity	molecular_function	8	0	TRINITY_DN37541_c1_g4	4.26127	up	EFR	PREDICTED: putative receptor-like protein kinase At3g47110 isoform X1 [Populus euphratica]	39.04	50.4	38.68	16.4	14.11	10.62	42.71	13.71
GO:0004674	protein serine/threonine kinase activity	molecular_function	8	0	TRINITY_DN37564_c0_g1	3.08545	up	INRPK1	hypothetical protein AMTR_s00022p00151480 [Amborella trichopoda]	5.33	6.41	2.63	1.58	0.71	0.65	4.79	0.98
GO:0004674	protein serine/threonine kinase activity	molecular_function	8	0	TRINITY_DN37596_c0_g1	-6.31854	down	LECRK91	PREDICTED: seed lectin [Vitis vinifera]	0.17	0.16	0.05	11.99	15.67	12.42	0.13	13.36
GO:0004674	protein serine/threonine kinase activity	molecular_function	8	0	TRINITY_DN37605_c0_g2	-1.08306	down	ZAR1	PREDICTED: probable inactive leucine-rich repeat receptor-like protein kinase At1g66830 [Amborella trichopoda]	1.59	2.4	3.76	9.46	12.26	11.6	2.58	11.11
GO:0004674	protein serine/threonine kinase activity	molecular_function	8	0	TRINITY_DN37636_c0_g3	3.60924	up	At4g26540	hypothetical protein [Cryptomeria japonica]	1	1.42	3.64	0.59	1.43	0.85	2.02	0.96
GO:0004674	protein serine/threonine kinase activity	molecular_function	8	0	TRINITY_DN37636_c0_g4	4.08251	up	At3g47570	PREDICTED: probable LRR receptor-like serine/threonine-protein kinase At3g47570 [Elaeis guineensis]	0.74	0.79	1.67	0.11	0.13	0.09	1.07	0.11
GO:0004674	protein serine/threonine kinase activity	molecular_function	8	0	TRINITY_DN37653_c0_g2	-1.72357	down	PEPR1	PREDICTED: leucine-rich repeat receptor-like protein kinase PEPR1 [Vitis vinifera]	0.94	1.4	0.28	3.29	4.64	4.9	0.87	4.28
GO:0004674	protein serine/threonine kinase activity	molecular_function	8	0	TRINITY_DN37739_c1_g1	3.79219	up	At5g49770	leucine-rich repeat transmembrane protein kinase [Populus trichocarpa]	0.64	0.7	4.3	0.47	0.09	0.11	1.88	0.22
GO:0004674	protein serine/threonine kinase activity	molecular_function	8	0	TRINITY_DN37769_c1_g5	-2.05546	down	At1g56130	PREDICTED: probable LRR receptor-like serine/threonine-protein kinase At1g56140 [Amborella trichopoda]	8.12	8.58	5.12	12.82	13.85	10.7	7.27	12.46
GO:0004674	protein serine/threonine kinase activity	molecular_function	8	0	TRINITY_DN37920_c0_g1	1.3439	up	At3g28040	PREDICTED: probably inactive leucine-rich repeat receptor-like protein kinase At3g28040 [Nelumbo nucifera]	4.52	5.73	4.61	3.42	3.5	3.16	4.95	3.36
GO:0004674	protein serine/threonine kinase activity	molecular_function	8	0	TRINITY_DN38185_c0_g1	-1.87565	down	TDR	PREDICTED: leucine-rich repeat receptor-like protein kinase TDR isoform X1 [Nelumbo nucifera]	7.81	15.24	1.4	40.29	56.91	55.29	8.15	50.83
GO:0004674	protein serine/threonine kinase activity	molecular_function	8	0	TRINITY_DN38185_c0_g2	-5.45318	down	BAM1	PREDICTED: leucine-rich repeat receptor-like serine/threonine-protein kinase BAM1 isoform X1 [Amborella trichopoda]	0.04	0.14	0.01	4.78	4.9	4.45	0.06	4.71
GO:0004674	protein serine/threonine kinase activity	molecular_function	8	0	TRINITY_DN38188_c0_g2	-1.29618	down	-	PREDICTED: uncharacterized protein LOC103995438 [Musa acuminata subsp. malaccensis]	2.01	2.89	3.15	11.1	12.26	10.55	2.68	11.3
GO:0004674	protein serine/threonine kinase activity	molecular_function	8	0	TRINITY_DN38208_c0_g2	-1.40149	down	FEI1	PREDICTED: LRR receptor-like serine/threonine-protein kinase FEI 1 isoform X1 [Nelumbo nucifera]	1.78	3.06	4.18	12.07	15.27	12.84	3.01	13.39
GO:0004674	protein serine/threonine kinase activity	molecular_function	8	0	TRINITY_DN38213_c1_g1	-7.25006	down	LECRK4	hypothetical protein SORBIDRAFT_06g002210 [Sorghum bicolor]	0	0.06	0.05	12.63	11.76	9.87	0.04	11.42
GO:0004674	protein serine/threonine kinase activity	molecular_function	8	0	TRINITY_DN38213_c1_g4	-5.75791	down	LECRK4	PREDICTED: G-type lectin S-receptor-like serine/threonine-protein kinase RLK1 [Amborella trichopoda]	0	0.04	0.08	6.82	2.64	2.18	0.04	3.88
GO:0004674	protein serine/threonine kinase activity	molecular_function	8	0	TRINITY_DN38213_c1_g5	-4.68018	down	SD17	PREDICTED: G-type lectin S-receptor-like serine/threonine-protein kinase LECRK1 [Nelumbo nucifera]	0.03	0.06	0.15	8.36	1.63	1.34	0.08	3.78
GO:0004674	protein serine/threonine kinase activity	molecular_function	8	0	TRINITY_DN38416_c1_g1	-1.1314	down	RPK2	PREDICTED: LRR receptor-like serine/threonine-protein kinase RPK2 [Amborella trichopoda]	1.28	2.16	1.66	6.45	6.31	6.16	1.7	6.31
GO:0004674	protein serine/threonine kinase activity	molecular_function	8	0	TRINITY_DN38429_c0_g1	-3.04917	down	NIK2	PREDICTED: protein NSP-INTERACTING KINASE 3 [Nelumbo nucifera]	0.65	2.32	2.98	28.24	22.44	23.48	1.98	24.72
GO:0004674	protein serine/threonine kinase activity	molecular_function	8	0	TRINITY_DN38524_c1_g2	-1.17086	down	BAM1	PREDICTED: leucine-rich repeat receptor-like serine/threonine-protein kinase BAM1 isoform X1 [Amborella trichopoda]	3.08	4.69	4.26	14.88	15.42	17.07	4.01	15.79
GO:0004674	protein serine/threonine kinase activity	molecular_function	8	0	TRINITY_DN38544_c0_g2	1.48492	up	At1g11050	PREDICTED: probable receptor-like protein kinase At1g11050 [Juglans regia]	17.27	7.29	1.73	3.98	3.22	3.24	8.76	3.48
GO:0004674	protein serine/threonine kinase activity	molecular_function	8	0	TRINITY_DN38593_c0_g1	1.77179	up	LRK10L-1.4	PREDICTED: probable serine/threonine-protein kinase At1g18390 isoform X2 [Elaeis guineensis]	28.67	28.78	17.58	21.97	19.74	17.3	25.01	19.67
GO:0004674	protein serine/threonine kinase activity	molecular_function	8	0	TRINITY_DN38627_c0_g1	4.57978	up	WAKL20	PREDICTED: wall-associated receptor kinase-like 20 [Elaeis guineensis]	23.71	11.61	9.72	1.82	0.71	0.9	15.01	1.14
GO:0004674	protein serine/threonine kinase activity	molecular_function	8	0	TRINITY_DN38661_c4_g1	1.52703	up	BAM1	clavata 1-like protein [Pinus pinea]	14.14	13.11	2.08	8.16	3.84	3.31	9.78	5.1
GO:0004674	protein serine/threonine kinase activity	molecular_function	8	0	TRINITY_DN38661_c5_g1	3.37796	up	HSL1	PREDICTED: receptor-like protein kinase HAIKU2, partial [Juglans regia]	19.3	19.97	6.9	3.66	3.22	0.99	15.39	2.62
GO:0004674	protein serine/threonine kinase activity	molecular_function	8	0	TRINITY_DN38774_c0_g3	-1.30656	down	LECRK91	PREDICTED: L-type lectin-domain containing receptor kinase IX.1 [Amborella trichopoda]	0.36	1.05	1.43	3.56	4.36	3.74	0.95	3.89
GO:0004674	protein serine/threonine kinase activity	molecular_function	8	0	TRINITY_DN38774_c0_g5	-4.27085	down	LECRK91	L-type lectin-domain containing receptor kinase IX.1 [Morus notabilis]	0	0	0.12	1.74	1.68	1.2	0.04	1.54
GO:0004674	protein serine/threonine kinase activity	molecular_function	8	0	TRINITY_DN38775_c3_g2	1.11129	up	At4g35230	PREDICTED: probable serine/threonine-protein kinase At4g35230 [Amborella trichopoda]	46.72	52.57	54.54	42.05	42.89	38.56	51.28	41.17
GO:0004674	protein serine/threonine kinase activity	molecular_function	8	0	TRINITY_DN38930_c1_g2	2.48877	up	CRK29	PREDICTED: uncharacterized protein LOC18597062 [Theobroma cacao]	2.99	3.18	3.21	2.19	3.42	2.66	3.13	2.76
[truncated: 35,403 more rows]
