# Supplementary material for: Transcriptional reprogramming strategies and miRNA-mediated regulation networks of Taxus media induced into callus cells from tissues
Source: BMC Genomics. 2020 Feb 18;21:168. doi: 10.1186/s12864-020-6576-2 (PMC7029464; doi:10.1186/s12864-020-6576-2)
Supplement: Supplementary file 6 — Additional file 6. GO annotation of DEGs and degraded DEGs Supplement figure compared the GO annotations of DEGs (a and b) with degraded DEGs (c and d). (a) GO annotations of DEGs, (b) GO enrichment analysis of DEGs (first 20 terms). (c) GO annotations of degraded DEGs, (d) GO enrichment analysis of degraded DEGs (first 20 terms). All these results suggested that miRNAs comprehensively regulated in transcriptional reprogramming in callus cells. [file 12864_2020_6576_MOESM6_ESM.xlsx]

## Sheet: a
Pre-miRNA Index	miRNA_Index	miR_name	miR_seq	len	genomeID	strand	start	end	pre-miRNA_seq	#mir/MIR	mirIDs,	rep_mirID	rep_mirSeq	rep_miRID	rep_miRSeq	type	Sequence in miRbase	group	SS	hairpinLen	CG%	dG	MFEI	Calli1(raw)	Calli2(raw)	Calli3(raw)	Tissue1(raw)	Tissue2(raw)	Tissue3(raw)	Calli1(norm)	Calli2(norm)	Calli3(norm)	Tissue1(norm)	Tissue2(norm)	Tissue3(norm)	Expression level
1	1	peu-MIR2916-p5_1ss5AG	TACCGTCCTAGTCTCAACCATA	22	contig_180	-	5596	5687	tgggggctcgaagacgatcagaTACCGTCCTAGTCTCAACCATAaacgaTGCCGACCAGGGATCGGCGGAtgttgctctaaggactccgcca	1	peu-MIR2916,	peu-MIR2916	TGGGGACTCGAAGACGATCATATaccatcctagtctcaaccataaacgatgccgaccagggattggcggatgttgcttctaggagtccgcca	peu-MIR2916-p5	Taccatcctagtctcaaccata	5'	New	gp1	..((((((....((((.........))))..))))))..........(((.((.....)).)))((((((.(((........))))))))).	35	56.5	-27.5	0.5	16674	8644	10645	2159	1643	7909	16504	7463.35	12481.7	2091.15	2084.7	7485.33	high
1	2	peu-MIR2916-p3_1ss15TC	TGCCGACCAGGGATCGGCGGA	21	contig_180	-	5596	5687	tgggggctcgaagacgatcagaTACCGTCCTAGTCTCAACCATAaacgaTGCCGACCAGGGATCGGCGGAtgttgctctaaggactccgcca	1	peu-MIR2916,	peu-MIR2916	TGGGGACTCGAAGACGATCATATaccatcctagtctcaaccataaacgatgccgaccagggattggcggatgttgcttctaggagtccgcca	peu-MIR2916-p3	tgccgaccagggattggcgga	3'	New	gp1	..((((((....((((.........))))..))))))..........(((.((.....)).)))((((((.(((........))))))))).	35	56.5	-27.5	0.5	3733	5913	5556	2830	2125	12436	3694.94	5105.37	6514.63	2741.06	2696.28	11769.8	high
1	1	pde-miR159_R-1	TTTGGTTTGAAGGGAGCTCT	20	contig_218845	-	63	140	gttagtggttcctttcaccttggaattaatttttgatttggaagaagaagaagagtcgTTTGGTTTGAAGGGAGCACT	1	pde-MIR159,	pde-MIR159	taagcggtagagctccttttgtaccaatcaaggactgtgcaaaaatgatccgactgccgatttatgcatccttctgccctgcgagtgttcgttgtttcaagtccgaatagattgcaggttagtggtttgcagaagaccgatttcattgcaggttagtggtgtgcataaggcgggagttgtattgattttgtgttgtcctcgTTTGGTTTGAAGGGAGCTCTActgggc	pde-miR159	TTTGGTTTGAAGGGAGCTCTA	3'	Diff	gp2a	...(((.((((((((((..(..((.....(((((..(((....)))...)))))....))..)..)))))))))))))	75	38.5	-19.1	0.6	4186	6362	4028	6491	5681	5465	4143.32	5493.04	4722.99	6287.01	7208.26	5172.25	high
2	2	pab-miR160a	TGCCTGGCTCCCTGTATGCCA	21	contig_723963	+	2012	2199	gttgcaggtgatgggttttggatgaggacgcctattatgattcaggttaaagtgTGCCTGGCTCCCTGTATGCCAcatacaaagttcatcagttgttgattgacttcataggtgGCTTACAAGGAGCCAAGCATAcatgttctgaccctaatacagttttttcttgttcataaccttttttctgcttt	113	pab-MIR160b,pab-MIR160a,ppt-MIR160f,ppt-MIR160a,ppt-MIR160e,ppt-MIR160i,ppt-MIR160b,smo-MIR160a,smo-MIR160b,mtr-MIR160b,mtr-MIR160e,mtr-MIR160a,mtr-MIR160d,mtr-MIR160c,mtr-MIR160f,gma-MIR160e,gma-MIR160f,gma-MIR160a,gma-MIR160c,gma-MIR160d,gma-MIR160b,ptc-MIR160b,ptc-MIR160a,ptc-MIR160c,ptc-MIR160d,ath-MIR160a,ath-MIR160c,ath-MIR160b,stu-MIR160b,stu-MIR160a,mdm-MIR160b,mdm-MIR160d,mdm-MIR160c,mdm…	pab-MIR160a	aaaggttgatgtgTGCCTGGCTCCCTGTATGCCAcatacaaggcccagtcatatgttgattggcttcataggtggcttacaaggagccaagcatacgttttcttac	pab-miR160a	TGCCTGGCTCCCTGTATGCCA	5'	Yes	gp2a	...(((((....(((((.((((..((((.((.(((((....(((((.....((((((.(((((((.((((.(((((.((..((((..(((((...)))))..))))..)).))))).)))).))))))).))))))....)))))...)))))..))...))))..)))).)))))....)))))...	182	41.5	-70.7	0.9	357	811	205	8944	6811	7556	353.36	700.229	240.37	8662.92	8642.04	7151.24	high
2	3	pab-MIR160a-p3	GCTTACAAGGAGCCAAGCATA	21	contig_723963	+	2012	2199	gttgcaggtgatgggttttggatgaggacgcctattatgattcaggttaaagtgTGCCTGGCTCCCTGTATGCCAcatacaaagttcatcagttgttgattgacttcataggtgGCTTACAAGGAGCCAAGCATAcatgttctgaccctaatacagttttttcttgttcataaccttttttctgcttt	113	pab-MIR160b,pab-MIR160a,ppt-MIR160f,ppt-MIR160a,ppt-MIR160e,ppt-MIR160i,ppt-MIR160b,smo-MIR160a,smo-MIR160b,mtr-MIR160b,mtr-MIR160e,mtr-MIR160a,mtr-MIR160d,mtr-MIR160c,mtr-MIR160f,gma-MIR160e,gma-MIR160f,gma-MIR160a,gma-MIR160c,gma-MIR160d,gma-MIR160b,ptc-MIR160b,ptc-MIR160a,ptc-MIR160c,ptc-MIR160d,ath-MIR160a,ath-MIR160c,ath-MIR160b,stu-MIR160b,stu-MIR160a,mdm-MIR160b,mdm-MIR160d,mdm-MIR160c,mdm…	pab-MIR160a	aaaggttgatgtgTGCCTGGCTCCCTGTATGCCAcatacaaggcccagtcatatgttgattggcttcataggtggcttacaaggagccaagcatacgttttcttac	pab-MIR160a-p3	gcttacaaggagccaagcata	3'	New	gp2a	...(((((....(((((.((((..((((.((.(((((....(((((.....((((((.(((((((.((((.(((((.((..((((..(((((...)))))..))))..)).))))).)))).))))))).))))))....)))))...)))))..))...))))..)))).)))))....)))))...	182	41.5	-70.7	0.9	0	8	0	0	0	0	0	6.90732	0	0	0	0	low
3	4	cln-miR164	TGGAGAAGCAGGGCACGTGCG	21	contig_1943195	+	158	269	caggtgggtgaatacacgcTGGAGAAGCAGGGCACGTGCGagatgttctcagtttcagaggtactttgcccctcgCACGTGCTCCCCTTCTCCAACatggattgcccactgc	102	cln-MIR164,mtr-MIR164c,mtr-MIR164a,mtr-MIR164b,gma-MIR164e,gma-MIR164j,gma-MIR164f,gma-MIR164h,gma-MIR164c,gma-MIR164i,gma-MIR164g,gma-MIR164d,gma-MIR164a,gma-MIR164b,gma-MIR164k,ptc-MIR164e,ptc-MIR164b,ptc-MIR164c,ptc-MIR164a,ptc-MIR164d,ath-MIR164c,ath-MIR164a,ath-MIR164b,mdm-MIR164c,mdm-MIR164b,mdm-MIR164e,mdm-MIR164f,mdm-MIR164d,mdm-MIR164a,aly-MIR164c,aly-MIR164b,aly-MIR164a,ppe-MIR164c,ppe-…	cln-MIR164	cctggTGGAGAAGCAGGGCACGTGCGatacacagaaacaattgtataaaccattatcgcatgtgctttccttctccaccaggc	cln-miR164	TGGAGAAGCAGGGCACGTGCG	5'	Yes	gp2a	..((((((..(...((...((((((((..(((((((((((((..((((((.......))))......))..)))))))))))))..))))))))...))..)..))))))..	108	57.1	-54.1	0.8	673	1462	331	5626	4052	5578	666.138	1262.31	388.11	5449.19	5141.32	5279.2	high
3	5	aly-miR164a-3p_1ss6AG	CACGTGCTCCCCTTCTCCAAC	21	contig_1943195	+	158	269	caggtgggtgaatacacgcTGGAGAAGCAGGGCACGTGCGagatgttctcagtttcagaggtactttgcccctcgCACGTGCTCCCCTTCTCCAACatggattgcccactgc	102	cln-MIR164,mtr-MIR164c,mtr-MIR164a,mtr-MIR164b,gma-MIR164e,gma-MIR164j,gma-MIR164f,gma-MIR164h,gma-MIR164c,gma-MIR164i,gma-MIR164g,gma-MIR164d,gma-MIR164a,gma-MIR164b,gma-MIR164k,ptc-MIR164e,ptc-MIR164b,ptc-MIR164c,ptc-MIR164a,ptc-MIR164d,ath-MIR164c,ath-MIR164a,ath-MIR164b,mdm-MIR164c,mdm-MIR164b,mdm-MIR164e,mdm-MIR164f,mdm-MIR164d,mdm-MIR164a,aly-MIR164c,aly-MIR164b,aly-MIR164a,ppe-MIR164c,ppe-…	aly-MIR164a	gtTGGAGAAGCAGGGCACGTGCAaaccaacaaacacgaaatccgtctcatgtgttttgCACGTACTCCCCTTCTCCAAC	aly-miR164a-3p	CACGTACTCCCCTTCTCCAAC	3'	Diff	gp2a	..((((((..(...((...((((((((..(((((((((((((..((((((.......))))......))..)))))))))))))..))))))))...))..)..))))))..	108	57.1	-54.1	0.8	11	11	6	81	15	31	10.8878	9.49756	7.03523	78.4545	19.0325	29.3394	middle
4	6	cpa-MIR164d-p3_1ss2TC	TCGCACGTGCCCTGCTTCTCC	21	contig_1943195	-	107	218	gcagtgggcaatccatgttggagaaggggagcacgtgcgaggggcaaagtacctctgaaactgagaacatcTCGCACGTGCCCTGCTTCTCCagcgtgtattcacccacctg	3	cpa-MIR164d,cpa-MIR164e,vun-MIR164,	cpa-MIR164d	TGGAGAAGGGGAGCACGTGCAatgcaggtgtcaatatctagcctttgcacgtgccctgcttctccaac	cpa-MIR164d-p3	ttgcacgtgccctgcttctcc	3'	New	gp2a	...(((((.(((.((((((((((((((((.((((((((((((.(.....)..(((.......)))....))))))))))))))).))))))))))))).)))..)))))...	106	57.1	-58	0.9	0	5	0	0	0	6	0	4.31707	0	0	0	5.67859	low
5	7	smo-MIR166b-p5_1ss13AG	GGAGTGTAGCCTGGCTCGAGA	21	contig_3187633	-	597	731	atgcggatttcgagataagtgtcgatatggtgtggGGAGTGTAGCCTGGCTCGAGAcctgcacgcattcatttatctaatggttTCGGACCAGGCTTCATTCCCCtcacaaaattctcgcttttctcttctggct	248	pab-MIR166a,pab-MIR166b,pta-MIR166b,pta-MIR166a,pde-MIR166b,pde-MIR166a,ppt-MIR166d,ppt-MIR166c,ppt-MIR166g,ppt-MIR166f,ppt-MIR166h,ppt-MIR166a,ppt-MIR166e,ppt-MIR166i,ppt-MIR166b,ppt-MIR166j,ppt-MIR166l,ppt-MIR166k,smo-MIR166b,smo-MIR166a,smo-MIR166c,mtr-MIR166e,mtr-MIR166g,mtr-MIR166a,mtr-MIR166c,mtr-MIR166f,mtr-MIR166b,mtr-MIR166d,gma-MIR166t,gma-MIR166b,gma-MIR166a,gma-MIR166d,gma-MIR166c,gma…	smo-MIR166b	ttcctcagtgagaaccaggatgtggggagtgtagcctagctcgagagattgatttgatactaaggctacgcacacaaggttgtgatcacagctttgtcTCGGACCAGGCTTCATTCCCCtcagtgtggtgctcact	smo-MIR166b-p5	ggagtgtagcctagctcgaga	5'	New	gp2a	...((((....((((.(((((..(((...(((.((((((((.(((((((..(((((((......................)))))))..))))))).)))))))).)))...)))..))))).)))).))))...	129	48.1	-59.9	0.9	5	0	6	12	11	7	4.94902	0	7.03523	11.6229	13.9572	6.62502	middle
5	8	pab-miR166a_2ss1TC20TC	CCGGACCAGGCTTCATTCCCC	21	contig_3187633	-	597	731	atgcggatttcgagataagtgtcgatatggtgtggGGAGTGTAGCCTGGCTCGAGAcctgcacgcattcatttatctaatggttTCGGACCAGGCTTCATTCCCCtcacaaaattctcgcttttctcttctggct	248	pab-MIR166a,pab-MIR166b,pta-MIR166b,pta-MIR166a,pde-MIR166b,pde-MIR166a,ppt-MIR166d,ppt-MIR166c,ppt-MIR166g,ppt-MIR166f,ppt-MIR166h,ppt-MIR166a,ppt-MIR166e,ppt-MIR166i,ppt-MIR166b,ppt-MIR166j,ppt-MIR166l,ppt-MIR166k,smo-MIR166b,smo-MIR166a,smo-MIR166c,mtr-MIR166e,mtr-MIR166g,mtr-MIR166a,mtr-MIR166c,mtr-MIR166f,mtr-MIR166b,mtr-MIR166d,gma-MIR166t,gma-MIR166b,gma-MIR166a,gma-MIR166d,gma-MIR166c,gma…	pab-MIR166a	ggagatcttggttgaggggaatgctatctggctcgaggtcgccttccttcgtcgTCGGACCAGGCTTCATTCCTCtctacttggacttcc	pab-miR166a	TCGGACCAGGCTTCATTCCTC	3'	Diff	gp2a	...((((....((((.(((((..(((...(((.((((((((.(((((((..(((((((......................)))))))..))))))).)))))))).)))...)))..))))).)))).))))...	129	48.1	-59.9	0.9	78	93	23.5	15899	7088.5	9836	77.2047	80.2975	27.5547	15399.3	8994.14	9309.11	high
6	9	pta-MIR166a-p5	GAATGTTGTCTGGCTCGACTT	21	contig_3595429	+	364	448	tctcaatgttgagggGAATGTTGTCTGGCTCGACTTcatcacaaagatgccgTCGGACCAGGCTTCATTCCCCccaattttgacg	237	pab-MIR166a,pab-MIR166b,pta-MIR166b,pta-MIR166a,pde-MIR166b,pde-MIR166a,ppt-MIR166d,ppt-MIR166c,ppt-MIR166g,ppt-MIR166f,ppt-MIR166h,ppt-MIR166a,ppt-MIR166e,ppt-MIR166i,ppt-MIR166b,ppt-MIR166j,ppt-MIR166l,ppt-MIR166k,smo-MIR166b,smo-MIR166a,smo-MIR166c,mtr-MIR166e,mtr-MIR166g,mtr-MIR166a,mtr-MIR166b,mtr-MIR166c,mtr-MIR166f,gma-MIR166t,gma-MIR166b,gma-MIR166a,gma-MIR166d,gma-MIR166c,gma-MIR166g,gma…	pta-MIR166a	ttgattgaggggaatgttgtctggctcgacttcatccggatttgggctccaatgttcggatgccgTCGGACCAGGCTTCATTCCCCccaatcgg	pta-MIR166a-p5	gaatgttgtctggctcgactt	5'	New	gp2a	..((((..(((.((((((((..((((((..((((..((((.....))))..))))..))))))..)))))))).)))..))))..	81	50.6	-43.3	1	0	15	0	44	46	39	0	12.9512	0	42.6172	58.3664	36.9109	middle
6	10	pab-miR166a_1ss20TC	TCGGACCAGGCTTCATTCCCC	21	contig_3595429	+	364	448	tctcaatgttgagggGAATGTTGTCTGGCTCGACTTcatcacaaagatgccgTCGGACCAGGCTTCATTCCCCccaattttgacg	237	pab-MIR166a,pab-MIR166b,pta-MIR166b,pta-MIR166a,pde-MIR166b,pde-MIR166a,ppt-MIR166d,ppt-MIR166c,ppt-MIR166g,ppt-MIR166f,ppt-MIR166h,ppt-MIR166a,ppt-MIR166e,ppt-MIR166i,ppt-MIR166b,ppt-MIR166j,ppt-MIR166l,ppt-MIR166k,smo-MIR166b,smo-MIR166a,smo-MIR166c,mtr-MIR166e,mtr-MIR166g,mtr-MIR166a,mtr-MIR166b,mtr-MIR166c,mtr-MIR166f,gma-MIR166t,gma-MIR166b,gma-MIR166a,gma-MIR166d,gma-MIR166c,gma-MIR166g,gma…	pab-MIR166a	ggagatcttggttgaggggaatgctatctggctcgaggtcgccttccttcgtcgTCGGACCAGGCTTCATTCCTCtctacttggacttcc	pab-miR166a	TCGGACCAGGCTTCATTCCTC	3'	Diff	gp2a	..((((..(((.((((((((..((((((..((((..((((.....))))..))))..))))))..)))))))).)))..))))..	81	50.6	-43.3	1	912	1164	621.5	53823	22731	33777	902.701	1005.01	728.733	52131.5	28841.9	31967.6	high
7	11	pta-MIR166b-p5_2ss4CG21AG	GGAGTGCAGCCTGGCACGAGG	21	contig_3734653	-	47	156	ggcagagttggggtggggGGAGTGCAGCCTGGCACGAGGcctgacaaaagtgggcagccagccatgctgttgacTCGGACCAGGCTTCATTCCCCtcacaacactcttcc	248	pab-MIR166b,pab-MIR166a,pta-MIR166b,pta-MIR166a,pde-MIR166b,pde-MIR166a,ppt-MIR166d,ppt-MIR166c,ppt-MIR166g,ppt-MIR166f,ppt-MIR166h,ppt-MIR166a,ppt-MIR166e,ppt-MIR166i,ppt-MIR166b,ppt-MIR166j,ppt-MIR166l,ppt-MIR166k,smo-MIR166b,smo-MIR166a,smo-MIR166c,mtr-MIR166e,mtr-MIR166g,mtr-MIR166a,mtr-MIR166b,mtr-MIR166c,mtr-MIR166f,mtr-MIR166d,gma-MIR166t,gma-MIR166b,gma-MIR166a,gma-MIR166d,gma-MIR166c,gma…	pta-MIR166b	ggcagagttggggtgaggggactgcagcctggcacgagacctgaaaacttttctgacaagcagccgggcgggcagagtcacgcatggtgTCGGACCAGGCTTCATTCCCCtcacaacactcttcc	pta-MIR166b-p5	ggactgcagcctggcacgaga	5'	New	gp2a	((.((((.((..((((((((((((.(((((((..((((((((.((....))))))...((((...))))....))))..))))))).))))))))))))..)))))).))	110	61.8	-62.7	0.9	0	0	0	12	0	0	0	0	0	11.6229	0	0	middle
7	12	pab-miR166b_3ss1TC20TC21TC	CCGGACCAGGCTTCATTCCCC	21	contig_3734653	-	47	156	ggcagagttggggtggggGGAGTGCAGCCTGGCACGAGGcctgacaaaagtgggcagccagccatgctgttgacTCGGACCAGGCTTCATTCCCCtcacaacactcttcc	248	pab-MIR166b,pab-MIR166a,pta-MIR166b,pta-MIR166a,pde-MIR166b,pde-MIR166a,ppt-MIR166d,ppt-MIR166c,ppt-MIR166g,ppt-MIR166f,ppt-MIR166h,ppt-MIR166a,ppt-MIR166e,ppt-MIR166i,ppt-MIR166b,ppt-MIR166j,ppt-MIR166l,ppt-MIR166k,smo-MIR166b,smo-MIR166a,smo-MIR166c,mtr-MIR166e,mtr-MIR166g,mtr-MIR166a,mtr-MIR166b,mtr-MIR166c,mtr-MIR166f,mtr-MIR166d,gma-MIR166t,gma-MIR166b,gma-MIR166a,gma-MIR166d,gma-MIR166c,gma…	pab-MIR166b	tttcagagttgggatatcgggaatgaaacctgggtcaagatgatttgaaggcaggctgttgaagattatcTCGGACCAGGCTTCATTCCTTgcatccaaactctttaagtactgctgctcaattgaaaa	pab-miR166b	TCGGACCAGGCTTCATTCCTT	3'	Diff	gp2a	((.((((.((..((((((((((((.(((((((..((((((((.((....))))))...((((...))))....))))..))))))).))))))))))))..)))))).))	110	61.8	-62.7	0.9	78	93	23.5	15899	7088.5	9836	77.2047	80.2975	27.5547	15399.3	8994.14	9309.11	high
8	13	pab-miR166b_L+2R-2	TCTCGGACCAGGCTTCATTCC	21	contig_1291062	+	169	294	gaagtaatagcagagttgtggtgtttggaatgaagactgggtcaagatattatttggcggctacccactctggtttccaactaTCTCGGACCAGGCTTCATTCCtgccgtcacaactctttacaag	235	pab-MIR166b,pab-MIR166a,pta-MIR166b,pta-MIR166a,pde-MIR166b,pde-MIR166a,ppt-MIR166f,ppt-MIR166d,ppt-MIR166c,ppt-MIR166g,ppt-MIR166h,ppt-MIR166a,ppt-MIR166e,ppt-MIR166i,ppt-MIR166b,smo-MIR166b,smo-MIR166a,smo-MIR166c,mtr-MIR166g,mtr-MIR166b,mtr-MIR166a,mtr-MIR166c,mtr-MIR166f,mtr-MIR166e,gma-MIR166t,gma-MIR166b,gma-MIR166d,gma-MIR166u,gma-MIR166s,gma-MIR166n,gma-MIR166j,gma-MIR166f,gma-MIR166k,gma…	pab-MIR166b	tttcagagttgggatatcgggaatgaaacctgggtcaagatgatttgaaggcaggctgttgaagattatcTCGGACCAGGCTTCATTCCTTgcatccaaactctttaagtactgctgctcaattgaaaa	pab-miR166b	TCGGACCAGGCTTCATTCCTT	3'	Diff	gp2a	...((((....(((((((((..(...(((((((((.((((..(.(((((....((((..((((.......))))..)))).))))).)..)))).)))))))))...)..)))))))))))))...	120	46	-49.7	0.9	39	48.5	66	3859.5	2207.5	2633	38.6024	41.8756	77.3876	3738.21	2800.95	2491.96	high
9	14	pab-miR166b_2ss20TC21TC	TCGGACCAGGCTTCATTCCCC	21	contig_3401902	+	873	995	tcaatgagagtttctctatggggaatgtggcctgtttcgagggtatactttgagaacattaggaattttttcggactatattcTCGGACCAGGCTTCATTCCCCttagacagactcttatctt	239	pab-MIR166b,pab-MIR166a,pta-MIR166b,pta-MIR166a,pde-MIR166b,pde-MIR166a,ppt-MIR166d,ppt-MIR166c,ppt-MIR166g,ppt-MIR166f,ppt-MIR166h,ppt-MIR166a,ppt-MIR166e,ppt-MIR166i,ppt-MIR166b,ppt-MIR166j,ppt-MIR166l,ppt-MIR166k,smo-MIR166b,smo-MIR166a,smo-MIR166c,mtr-MIR166e,mtr-MIR166g,mtr-MIR166b,mtr-MIR166a,mtr-MIR166c,mtr-MIR166f,gma-MIR166t,gma-MIR166b,gma-MIR166a,gma-MIR166d,gma-MIR166c,gma-MIR166g,gma…	pab-MIR166b	tttcagagttgggatatcgggaatgaaacctgggtcaagatgatttgaaggcaggctgttgaagattatcTCGGACCAGGCTTCATTCCTTgcatccaaactctttaagtactgctgctcaattgaaaa	pab-miR166b	TCGGACCAGGCTTCATTCCTT	3'	Diff	gp2a	...((((((((((.((((.((((((((..(((((.((((((..((((.(..(((((.(((...))).)))))..).))))..)))))).)))))..)))))))).)))).))))))))))...	117	41.5	-60.6	1.2	912	1164	621.5	53823	22731	33777	902.701	1005.01	728.733	52131.5	28841.9	31967.6	high
10	15	mtr-miR167b-5p	TGAAGCTGCCAGCATGATCTG	21	contig_1494829	+	1655	1770	tcattggttttgggaatagcTGAAGCTGCCAGCATGATCTGgtgatttttagttgttactttacttttatttaccaggtcattttggcagtctcaactcttccctcctactaaact	161	mtr-MIR167b,mtr-MIR167a,gma-MIR167c,gma-MIR167g,gma-MIR167j,gma-MIR167b,gma-MIR167e,gma-MIR167f,gma-MIR167a,gma-MIR167d,ptc-MIR167e,ptc-MIR167f,ptc-MIR167c,ptc-MIR167g,ptc-MIR167a,ptc-MIR167b,ptc-MIR167d,ath-MIR167d,ath-MIR167b,ath-MIR167a,gra-MIR167b,gra-MIR167a,gra-MIR167c,stu-MIR167d,stu-MIR167b,stu-MIR167a,stu-MIR167c,mdm-MIR167b,mdm-MIR167j,mdm-MIR167f,mdm-MIR167e,mdm-MIR167a,mdm-MIR167h,mdm…	mtr-MIR167b	caatgacagtTGAAGCTGCCAGCATGATCTGtgctttccttcctgtgtatatactttaatttccagctgaatttaaatataaccaaaaaaataaatatgtttggtctaaattttgatcaaacttatatatatttttgcttatgtttaagtctggggtgagtttatttgtggtaagaacaGATCATGTTGGAGCTTCACCtgttaaat	mtr-miR167b-5p	TGAAGCTGCCAGCATGATCTG	5'	Yes	gp2a	...(((((...(((((.((.(((..((((((..((((((((((((.....(((.........))).....))))))))))))..))))))..))).)).)))))....)))))...	110	38.8	-46.8	1	0	0	139	370	556	510	0	0	162.983	358.372	705.473	482.68	middle
11	16	pde-miR169_2ss9GA20TG	CAGCCAAGAATGACTTGCCGA	21	contig_3331872	-	353	508	tattcatctttgatgttgcacgaagaaccagagagctttatgCAGCCAAGAATGACTTGCCGAcgccaagaataataatttgttgaattggccgtgGGCAAGTTGTTTTTGGCTACacattgcgctttgtttctcatgcaatttctcagatgacag	38	pde-MIR169,mtr-MIR169g,mtr-MIR169a,gma-MIR169k,gma-MIR169l,gma-MIR169b,gma-MIR169u,gma-MIR169v,gma-MIR169a,ptc-MIR169a,ptc-MIR169c,ptc-MIR169b,ath-MIR169a,ath-MIR169b,aly-MIR169a,aly-MIR169b,nta-MIR169a,nta-MIR169k,nta-MIR169c,nta-MIR169i,mes-MIR169m,mes-MIR169l,mes-MIR169g,lus-MIR169g,lus-MIR169l,bna-MIR169b,bna-MIR169a,bna-MIR169n,tcc-MIR169e,tcc-MIR169a,cpa-MIR169,vun-MIR169,osa-MIR169a,bdi-MI…	pde-MIR169	actatttattCAGCCAAGGATGACTTGCCTAgatcttgttaccagtatcggctagttatgctgatatcgatttcagtcactaggtgagtcgtccttggctaaa	pde-miR169	CAGCCAAGGATGACTTGCCTA	5'	Diff	gp2a	...((((((..((..(((((.(.((((.(((((.((....((.(((((((((..(((((((.(((((((.(((((....)))))...)))).))).)))))))..))))))))).))....)).))))).))))).)))))..))..))))))...	150	41.7	-67.2	1	64.5	145	18	25	21	22	63.8424	125.195	21.1057	24.2143	26.6456	20.8215	middle
11	17	gma-miR169l-3p_L-2	GGCAAGTTGTTTTTGGCTAC	20	contig_3331872	-	353	508	tattcatctttgatgttgcacgaagaaccagagagctttatgCAGCCAAGAATGACTTGCCGAcgccaagaataataatttgttgaattggccgtgGGCAAGTTGTTTTTGGCTACacattgcgctttgtttctcatgcaatttctcagatgacag	38	pde-MIR169,mtr-MIR169g,mtr-MIR169a,gma-MIR169k,gma-MIR169l,gma-MIR169b,gma-MIR169u,gma-MIR169v,gma-MIR169a,ptc-MIR169a,ptc-MIR169c,ptc-MIR169b,ath-MIR169a,ath-MIR169b,aly-MIR169a,aly-MIR169b,nta-MIR169a,nta-MIR169k,nta-MIR169c,nta-MIR169i,mes-MIR169m,mes-MIR169l,mes-MIR169g,lus-MIR169g,lus-MIR169l,bna-MIR169b,bna-MIR169a,bna-MIR169n,tcc-MIR169e,tcc-MIR169a,cpa-MIR169,vun-MIR169,osa-MIR169a,bdi-MI…	gma-MIR169l	gagtgatttgCAGCCAAGAATGACTTGCCGGaatgcatatatatgcattaggtaccaacatatatagttgtattgtataatttCGGGCAAGTTGTTTTTGGCTACatttatctc	gma-miR169l-3p	CGGGCAAGTTGTTTTTGGCTAC	3'	Diff	gp2a	...((((((..((..(((((.(.((((.(((((.((....((.(((((((((..(((((((.(((((((.(((((....)))))...)))).))).)))))))..))))))))).))....)).))))).))))).)))))..))..))))))...	150	41.7	-67.2	1	22	43	11	0	0	0	21.7757	37.1268	12.8979	0	0	0	middle
12	18	mtr-miR169d-5p_1ss1AC	CAGCCAAGGATGACTTGCCGG	21	contig_4277912	+	1173	1341	cattcatgtgggttctggcatgaagagctttaacagataatgAAGCCAAGGATGACTTGCCGGcataatttagagtgtatatgcatctaaatacatataaacatttgtgGGCAGGTCGTGCTTGGCTACCtaatctgcttggattctcatgtcagagctcatatgatca	98	mtr-MIR169d,mtr-MIR169g,mtr-MIR169e,mtr-MIR169b,mtr-MIR169l,gma-MIR169g,gma-MIR169v,gma-MIR169d,gma-MIR169s,gma-MIR169h,gma-MIR169f,gma-MIR169a,gma-MIR169m,gma-MIR169e,ptc-MIR169h,ptc-MIR169e,ptc-MIR169d,ptc-MIR169g,ptc-MIR169f,ptc-MIR169p,ptc-MIR169s,ath-MIR169f,ath-MIR169b,ath-MIR169c,ath-MIR169g,mdm-MIR169a,aly-MIR169g,aly-MIR169c,aly-MIR169b,aly-MIR169f,ppe-MIR169c,ppe-MIR169a,ppe-MIR169b,vvi…	mtr-MIR169d	agatgAAGCCAAGGATGACTTGCCGGtataatagtaatttgccacaaatctagatagctattagctatgtttggatgggcggtgagattaacaaaattacagcagcattgtgattttgttgatgctttaaagtgtagtttttatcaaaattacagtggttcactgtaattatgagaatctcaccgtcaatctaaatatgcatttagtttcatttccGGCAGGTCATCCTTCGGCTATAtt	mtr-miR169d-5p	AAGCCAAGGATGACTTGCCGG	5'	Diff	gp2a	...((((((((((((((((((((.(((.(..(((((((.....(((((((.((((((((((......(((((((.(((....)))))))))).((((........)))))))))))))).))))))).....))))).))..))))))))))))))))))))))))...	163	40.8	-75.9	1.1	59	103.5	61.5	38	68	91.5	58.3984	89.3634	72.1111	36.8058	86.2808	86.5985	middle
12	19	nta-MIR169r-p3_2ss11CG21AC	GGCAGGTCGTGCTTGGCTACC	21	contig_4277912	+	1173	1341	cattcatgtgggttctggcatgaagagctttaacagataatgAAGCCAAGGATGACTTGCCGGcataatttagagtgtatatgcatctaaatacatataaacatttgtgGGCAGGTCGTGCTTGGCTACCtaatctgcttggattctcatgtcagagctcatatgatca	98	mtr-MIR169d,mtr-MIR169g,mtr-MIR169e,mtr-MIR169b,mtr-MIR169l,gma-MIR169g,gma-MIR169v,gma-MIR169d,gma-MIR169s,gma-MIR169h,gma-MIR169f,gma-MIR169a,gma-MIR169m,gma-MIR169e,ptc-MIR169h,ptc-MIR169e,ptc-MIR169d,ptc-MIR169g,ptc-MIR169f,ptc-MIR169p,ptc-MIR169s,ath-MIR169f,ath-MIR169b,ath-MIR169c,ath-MIR169g,mdm-MIR169a,aly-MIR169g,aly-MIR169c,aly-MIR169b,aly-MIR169f,ppe-MIR169c,ppe-MIR169a,ppe-MIR169b,vvi…	nta-MIR169r	gagtggattgCAGCCAAGGATGACTTGCCGGgatgttgtagtcaatgcaacgacttatcggtaggtcgtccttggctacattttactctcttctgctcatgtaaggctctataagatatatatataattcgaggtgaagtcagtaattgtttcacaaattacatccagttgaattgctcataatttgtctagagagtcattgcatgaagaggtagcgagtgaattgcagccaaggagacttgtcaagatgttgcagccaatgcaacgacttatcggcaggtcgtccttggctacatttcactctct	nta-MIR169r-p3	ggcaggtcgtccttggctaca	3'	New	gp2a	...((((((((((((((((((((.(((.(..(((((((.....(((((((.((((((((((......(((((((.(((....)))))))))).((((........)))))))))))))).))))))).....))))).))..))))))))))))))))))))))))...	163	40.8	-75.9	1.1	0	17	0	0	0	0	0	14.678	0	0	0	0	middle
13	20	gma-miR169k_1ss20GC	CAGCCAAGAATGACTTGCCCG	21	contig_2221105	+	1551	1706	caatcatgtagagttttgcatggagagatggagcgcgttactCAGCCAAGAATGACTTGCCCGcatggccgagacagttataaatacagtattgtgggctggtcattcttggcacagcatcatgttcacctccttatgccagactctatatgattc	86	pde-MIR169,mtr-MIR169g,mtr-MIR169b,mtr-MIR169l,gma-MIR169k,gma-MIR169l,gma-MIR169j,gma-MIR169f,gma-MIR169g,gma-MIR169v,gma-MIR169a,gma-MIR169m,ptc-MIR169t,ptc-MIR169h,ptc-MIR169s,ptc-MIR169g,ptc-MIR169f,ptc-MIR169e,ptc-MIR169d,ptc-MIR169p,ptc-MIR169ab,ath-MIR169c,ath-MIR169b,mdm-MIR169c,mdm-MIR169d,mdm-MIR169a,aly-MIR169c,aly-MIR169b,ppe-MIR169c,ppe-MIR169b,ppe-MIR169a,vvi-MIR169c,vvi-MIR169a,vvi…	gma-MIR169l	gagtgatttgCAGCCAAGAATGACTTGCCGGaatgcatatatatgcattaggtaccaacatatatagttgtattgtataatttCGGGCAAGTTGTTTTTGGCTACatttatctc	gma-miR169k	CAGCCAAGAATGACTTGCCGG	5'	Diff	gp2a	.(((((((((((((((.(((((..(((...(((((.....((..((((((((((((..(((((((..((...................))..)))))))..))))))))))))..)).....)))))..)))..))))).))))))))))))))).	154	46.2	-67.9	0.9	195	564	244.5	48.5	13	31.5	193.012	486.966	286.686	46.9758	16.4949	29.8126	middle
14	20	gma-miR169k_1ss20GC	CAGCCAAGAATGACTTGCCCG	21	contig_817060	+	543	708	tattcgtggaagagtcttgcattgagagtcaagcgtgttactCAGCCAAGAATGACTTGCCCAtatcatacaactatattgaaatgaaagtgggatattaaaatatgggcaagttattcttggcaaagcatgcacttgattttcgatgccagaccacacacgactc	99	pde-MIR169,mtr-MIR169d,mtr-MIR169e,mtr-MIR169b,gma-MIR169k,gma-MIR169l,gma-MIR169b,gma-MIR169j,gma-MIR169d,ptc-MIR169t,ptc-MIR169h,ptc-MIR169w,ptc-MIR169v,ptc-MIR169s,ptc-MIR169n,ptc-MIR169k,ptc-MIR169x,ath-MIR169c,ath-MIR169a,ath-MIR169f,ath-MIR169m,mdm-MIR169c,mdm-MIR169d,aly-MIR169c,aly-MIR169a,aly-MIR169f,aly-MIR169k,aly-MIR169m,vvi-MIR169o,nta-MIR169a,nta-MIR169k,nta-MIR169c,nta-MIR169i,mes-…	gma-MIR169l	gagtgatttgCAGCCAAGAATGACTTGCCGGaatgcatatatatgcattaggtaccaacatatatagttgtattgtataatttCGGGCAAGTTGTTTTTGGCTACatttatctc	gma-miR169k	CAGCCAAGAATGACTTGCCGG	5'	Diff	gp2a	...(((((.....((((.(((((((((((((((((((((.....((((((((((((((((((((((..........((((........))))..........))))))))))))))))))))))..)))))))..)))))))))))))).))))....)))))...	160	40.4	-74.4	1.1	195	564	244.5	48.5	13	31.5	193.012	486.966	286.686	46.9758	16.4949	29.8126	middle
15	21	mtr-miR169b	CAGCCAAGGATGACTTGCCGG	21	contig_3391384	+	1	121	gagagcgtgttaccCAGCCAAGGATGACTTGCCTGcctgttataaaattacgtgggtatctgaatatttatatgttcatattagcaggcaagtgattcttggtaaggcatctcgctctatt	135	pde-MIR169,mtr-MIR169g,mtr-MIR169b,mtr-MIR169l,mtr-MIR169a,mtr-MIR169d,mtr-MIR169e,gma-MIR169g,gma-MIR169v,gma-MIR169f,gma-MIR169a,gma-MIR169m,gma-MIR169b,gma-MIR169d,gma-MIR169s,gma-MIR169h,gma-MIR169u,gma-MIR169e,ptc-MIR169h,ptc-MIR169e,ptc-MIR169d,ptc-MIR169g,ptc-MIR169f,ptc-MIR169p,ptc-MIR169s,ptc-MIR169c,ptc-MIR169a,ptc-MIR169b,ptc-MIR169ab,ath-MIR169b,ath-MIR169c,ath-MIR169f,ath-MIR169a,ath…	mtr-MIR169l	gcagagagtgtagtaCAGCCAAGGATGACTTGCCGGccggcgttagtgaaggcaaaggcaaatgatcattcatgttcatgcatgcatattctccggccGGCAAGTTTTTCCTTGGCTATAttggactttcttc	mtr-miR169b	CAGCCAAGGATGACTTGCCGG	5'	Yes	gp2a	.((((((.....((..(((((((((.((((((((((............(((....)))..(((((((....))))))).....)))))))))).)))))))))..)).....))))))...	117	41.3	-50	1	59	103.5	61.5	38	68	91.5	58.3984	89.3634	72.1111	36.8058	86.2808	86.5985	middle
16	22	gma-miR169j-5p_2ss20GC21GA	TAGCCAAGAATGACTTGCCCA	21	contig_3897427	+	1528	1669	atcttgtattaagaggccaagcgtgctactTAGCCAAGAATGACTTGCCCAtacaatggaattatattggaatagaaacaatattataatatgggcaagtcattctttggtgaagcatgcgctcggtttcccattacagaca	35	gma-MIR169j,gma-MIR169k,gma-MIR169l,ptc-MIR169w,ptc-MIR169v,ptc-MIR169t,mdm-MIR169c,mdm-MIR169d,mes-MIR169i,mes-MIR169j,mes-MIR169m,mes-MIR169k,mes-MIR169l,mes-MIR169v,mes-MIR169x,mes-MIR169z,mes-MIR169t,mes-MIR169r,lus-MIR169a,lus-MIR169d,cme-MIR169r,cme-MIR169t,tcc-MIR169f,tcc-MIR169i,osa-MIR169o,osa-MIR169n,osa-MIR1430,bdi-MIR169d,sbi-MIR169i,sbi-MIR169q,sbi-MIR169p,zma-MIR169o,zma-MIR169m,zma…	gma-MIR169j	gTAGCCAAGAATGACTTGCCGGaatgcatgcatttattaggtaccaaggtgtattgtatgaTTTCGACGAGTTGTTCTTGGCtac	gma-miR169j-5p	TAGCCAAGAATGACTTGCCGG	5'	Diff	gp2a	...(((((....((..((..(((((((.....(((((((((((((((((((((..(((.....((((((.........)))))))))..)))))))))))))))))).)))..)))))))....))..))....)))))...	136	38.7	-55.4	1	29.5	54.5	22.5	38	35	31	29.1992	47.0561	26.3821	36.8058	44.4093	29.3394	middle
17	23	bdi-miR169i_L-1_2ss3AT21TC	CTGCCAAGAATGGCTTGCCCA	21	contig_66106	+	1184	1312	tacgaggcggagcgtgttactCAGCCAAGAATGGCTTGCCCAcactatgttaggaaagtgtctgatgtagattacagtcgattaaagtgagcaagccattgttggtttagcatcaccttctgcttttca	7	osa-MIR1430,bdi-MIR169i,sbi-MIR169p,sbi-MIR169q,zma-MIR169n,zma-MIR169m,zma-MIR169q,	bdi-MIR169i	tggagacgaggagcccctttgcaggctctaCCAGCCAAGAATGGCTTGCCTAtgcccacgttctgtttcatcaccactgggcttaatcttggagccctggtgatggatgagatgtgattgtatggtcaagccatcttggctagaagagagatcctcgtcccccatgctaggctgc	bdi-miR169i	CCAGCCAAGAATGGCTTGCCTA	5'	Diff	gp2a	...((((((((..(((...((.((((((.((((((((((.(((.(((..(((((......)))))..))).(((........))).))).)))))))))).)))))).))...)))..))))))))...	123	45	-49.7	0.9	0	0	0	77	82	49	0	0	0	74.5802	104.045	46.3752	middle
18	24	gma-miR169k_R+1_1ss20GC	CAGCCAAGAATGACTTGCCCGT	22	contig_877486	+	2	148	agagtcttgcattgagagacaagtgtgttactCAGCCAAGAATGACTTGCCCATatcattctcgtttattgaaatagacactgaatgttataatatgggcaaatcattcttggcaaagcatgcactcggctttccatgccagaccac	82	mtr-MIR169b,mtr-MIR169d,mtr-MIR169e,gma-MIR169k,gma-MIR169l,gma-MIR169j,gma-MIR169u,gma-MIR169d,ptc-MIR169t,ptc-MIR169w,ptc-MIR169v,ptc-MIR169n,ptc-MIR169k,ptc-MIR169x,ath-MIR169c,ath-MIR169f,ath-MIR169m,stu-MIR169f,mdm-MIR169c,mdm-MIR169d,aly-MIR169c,aly-MIR169f,aly-MIR169k,aly-MIR169m,vvi-MIR169o,vvi-MIR169l,nta-MIR169a,nta-MIR169k,nta-MIR169c,nta-MIR169i,nta-MIR169t,mes-MIR169m,mes-MIR169l,mes…	gma-MIR169l	gagtgatttgCAGCCAAGAATGACTTGCCGGaatgcatatatatgcattaggtaccaacatatatagttgtattgtataatttCGGGCAAGTTGTTTTTGGCTACatttatctc	gma-miR169k	CAGCCAAGAATGACTTGCCGG	5'	Diff	gp2a	...((((.((((.(((((...((((..(..((..(((((((((((.(((((((((((((((..((((((....))))))...))))).....)))))))))).)))))))))))..)).)..))))...))))).)))).))))...	141	41.5	-63.2	1	76.5	140.5	47	14	16	12	75.72	121.31	55.1093	13.56	20.3014	11.3572	middle
19	25	sbi-MIR171k-p5_2ss4TG20AG	ATAGTGGCGCGGTTCAATCGG	21	contig_3918999	-	807	909	gaatgaacgtgtgATAGTGGCGCGGTTCAATCGGatcactctgttggtttttgtatccaatattttgatcaaaTTGAGCCGTGCCAATATCACAcatttactt	129	pde-MIR171,ppt-MIR171a,ppt-MIR171b,smo-MIR171a,smo-MIR171b,smo-MIR171d,mtr-MIR171d,mtr-MIR171f,mtr-MIR171e,gma-MIR171c,gma-MIR171o,gma-MIR171a,gma-MIR171f,gma-MIR171i,gma-MIR171q,gma-MIR171k,gma-MIR171l,ptc-MIR171h,ptc-MIR171g,ptc-MIR171a,ptc-MIR171b,ptc-MIR171e,ptc-MIR171c,ptc-MIR171d,ptc-MIR171k,ath-MIR171c,ath-MIR171b,ath-MIR171a,stu-MIR171d,mdm-MIR171m,mdm-MIR171f,mdm-MIR171n,mdm-MIR171o,mdm-…	sbi-MIR171k	cgggatattggcgcggttcaatcagaaagcttgcgctccaaagcccaggggctccactcttTGATTGAGCCGTGCCAATATCacgtc	sbi-MIR171k-p5	atattggcgcggttcaatcag	5'	New	gp2a	...((((.((((((((.((((((((((((((..(((((...((((((.........))))))...)))))..)))))))))))))).)))))))).))))...	97	39.8	-49.7	1.2	0	0	0	14	0	0	0	0	0	13.56	0	0	middle
19	26	smo-miR171a	TTGAGCCGTGCCAATATCACT	21	contig_3918999	-	807	909	gaatgaacgtgtgATAGTGGCGCGGTTCAATCGGatcactctgttggtttttgtatccaatattttgatcaaaTTGAGCCGTGCCAATATCACAcatttactt	129	pde-MIR171,ppt-MIR171a,ppt-MIR171b,smo-MIR171a,smo-MIR171b,smo-MIR171d,mtr-MIR171d,mtr-MIR171f,mtr-MIR171e,gma-MIR171c,gma-MIR171o,gma-MIR171a,gma-MIR171f,gma-MIR171i,gma-MIR171q,gma-MIR171k,gma-MIR171l,ptc-MIR171h,ptc-MIR171g,ptc-MIR171a,ptc-MIR171b,ptc-MIR171e,ptc-MIR171c,ptc-MIR171d,ptc-MIR171k,ath-MIR171c,ath-MIR171b,ath-MIR171a,stu-MIR171d,mdm-MIR171m,mdm-MIR171f,mdm-MIR171n,mdm-MIR171o,mdm-…	smo-MIR171a	cgagcgagagcgatattggctctgctcaatcgcatgacgctgctgcatcgcacgaaaaatttgcgatgggaatggatcgatggagtcgcagcagaggcatgagaTTGAGCCGTGCCAATATCACTggtgtttttc	smo-miR171a	TTGAGCCGTGCCAATATCACT	3'	Yes	gp2a	...((((.((((((((.((((((((((((((..(((((...((((((.........))))))...)))))..)))))))))))))).)))))))).))))...	97	39.8	-49.7	1.2	711	1077	1475	354	326.5	488	703.751	929.897	1729.49	342.875	414.275	461.859	middle
20	27	smo-miR171b_L+1_2ss19AG22TC	TTGAGCCGTGCCAATATCGCAC	22	contig_2214503	+	1376	1486	tatgggctgtcttgagatgttggagcggttcaaccagacaacgttgttattaaacgttataatttcggtgtttgtTTGAGCCGTGCCAATATCGCACtagacttgccttcc	127	pde-MIR171,smo-MIR171b,smo-MIR171a,mtr-MIR171d,mtr-MIR171f,gma-MIR171j,gma-MIR171u,gma-MIR171f,gma-MIR171c,gma-MIR171g,gma-MIR171o,gma-MIR171e,gma-MIR171q,gma-MIR171i,gma-MIR171a,ptc-MIR171e,ptc-MIR171g,ptc-MIR171h,ptc-MIR171f,ptc-MIR171i,ptc-MIR171b,ptc-MIR171a,ath-MIR171c,ath-MIR171b,stu-MIR171e,stu-MIR171a,stu-MIR171d,mdm-MIR171g,mdm-MIR171m,mdm-MIR171n,mdm-MIR171o,mdm-MIR171h,mdm-MIR171f,aly-…	smo-MIR171b	tgtgtctgtgatattgacaaggctcaatcaggctgcaatgctactcgagctaattagtgatgctgccagctTGAGCCGTGCCAATATCACATagatagctagc	smo-miR171b	TGAGCCGTGCCAATATCACAT	3'	Diff	gp2a	...((((.((((((.((((((((..((((((((.((((((.((..(((((........)))))..)).)))))).))))))))..)))))))).))..))))..))))...	105	44.1	-48.5	1	0	0	14	352	317.5	488	0	0	16.4155	340.938	402.855	461.859	middle
21	28	ptc-MIR172d-p5_2ss7AG22AT	TGCGGCGTCATCAAGATTCACT	22	contig_2322700	-	165	292	gtcagtcaatggttgcagcTGCGGCGTCATCAAGATTCACTcatcaatgcccttcactgtttggtattagggttttttctgtgtatgagAGAATCTTGATGATGCTGCATctgcaataaatggctaaa	149	mtr-MIR172c,mtr-MIR172b,mtr-MIR172d,gma-MIR172b,gma-MIR172f,gma-MIR172a,gma-MIR172h,gma-MIR172g,gma-MIR172j,gma-MIR172i,gma-MIR172k,gma-MIR172l,gma-MIR172d,gma-MIR172c,gma-MIR172e,ptc-MIR172b,ptc-MIR172f,ptc-MIR172a,ptc-MIR172c,ptc-MIR172e,ptc-MIR172g,ptc-MIR172d,ptc-MIR172h,ath-MIR172a,ath-MIR172b,ath-MIR172e,ath-MIR172c,ath-MIR172d,gra-MIR172a,gra-MIR172b,stu-MIR172a,stu-MIR172b,stu-MIR172e,stu…	ptc-MIR172d	gcattggcggatgcggcatcatcaagattcacaagctttaaggcttgagtgagaggggtggcatacggtcacctcctttagcaagctttaaggcttgagtgagaggggtggcatacggtcacctcctttagtccaaagggtccttttttatgGGAATCTTGATGATGCTGCATcggcaaata	ptc-MIR172d-p5	tgcggcatcatcaagattcaca	5'	New	gp2a	...(((((...(((((((.(((((((((((((((((((.(((((((..(((((..(((....)))...)))))........)).))))).))))))))))))))))))).)))))))...)))))...	122	42.2	-62.7	1.2	430	527	177	3068	1340	1464	425.616	455.019	207.539	2971.58	1700.24	1385.58	high
21	29	mtr-miR172b	AGAATCTTGATGATGCTGCAT	21	contig_2322700	-	165	292	gtcagtcaatggttgcagcTGCGGCGTCATCAAGATTCACTcatcaatgcccttcactgtttggtattagggttttttctgtgtatgagAGAATCTTGATGATGCTGCATctgcaataaatggctaaa	149	mtr-MIR172c,mtr-MIR172b,mtr-MIR172d,gma-MIR172b,gma-MIR172f,gma-MIR172a,gma-MIR172h,gma-MIR172g,gma-MIR172j,gma-MIR172i,gma-MIR172k,gma-MIR172l,gma-MIR172d,gma-MIR172c,gma-MIR172e,ptc-MIR172b,ptc-MIR172f,ptc-MIR172a,ptc-MIR172c,ptc-MIR172e,ptc-MIR172g,ptc-MIR172d,ptc-MIR172h,ath-MIR172a,ath-MIR172b,ath-MIR172e,ath-MIR172c,ath-MIR172d,gra-MIR172a,gra-MIR172b,stu-MIR172a,stu-MIR172b,stu-MIR172e,stu…	mtr-MIR172b	tgtttgcagatgtagcatcatcaagattcatatgtgaatgatgcagagtggaactgctaatatttcaattgatcttttgaaataAGAATCTTGATGATGCTGCATcagccatat	mtr-miR172b	AGAATCTTGATGATGCTGCAT	3'	Yes	gp2a	...(((((...(((((((.(((((((((((((((((((.(((((((..(((((..(((....)))...)))))........)).))))).))))))))))))))))))).)))))))...)))))...	122	42.2	-62.7	1.2	288	492	583	3239	1872	1807	285.064	424.8	683.59	3137.21	2375.26	1710.2	high
22	30	pta-miR319_R+1	TTGGACTGAAGGGAGCTCCC	20	contig_3624382	+	52	134	attcccagatgggagctcctttcagtccaaaggactagagaagatctcgtcctTTGGACTGAAGGGAGCTCCCatctgggttt	119	pta-MIR319,pta-MIR159c,pta-MIR159b,ppt-MIR319e,ppt-MIR319c,ppt-MIR319d,ppt-MIR319a,ppt-MIR319b,smo-MIR319,smo-MIR159,mtr-MIR319b,mtr-MIR319a,mtr-MIR319d,mtr-MIR319c,mtr-MIR159b,gma-MIR319j,gma-MIR319h,gma-MIR319e,gma-MIR319b,gma-MIR319m,gma-MIR319k,gma-MIR319a,gma-MIR319p,gma-MIR319q,gma-MIR319g,gma-MIR319l,gma-MIR156aa,gma-MIR159b,gma-MIR319c,gma-MIR159c,gma-MIR156z,gma-MIR159f,gma-MIR319n,ptc-M…	pta-MIR319	gataagtggagctcccttcaatccaagaaatgcgtgtttagtgacagtacatctcctgcgtcatgcacaccactatcctgtcatgcaggtcgattgattgatttgttcaggctgctggagagtcacggacagggaagtagaatgcatgaatcagcagctgaaccaccgctgcacaagctttggTTGGACTGAAGGGAGCTCCaaca	pta-miR319	TTGGACTGAAGGGAGCTCC	3'	Diff	gp2a	...((((((((((((((((((((((((((((((((.(((.....))).))))))))))))))))))))))))))))))))...	77	50.6	-70.3	1.7	123	99	108.5	88914	186237	191172	121.746	85.478	127.22	86119.7	236304	180931	high
23	31	ppt-miR319a_R+1_1ss1CT	TTTGGACTGAAGGGAGCTCCC	21	contig_3624382	-	60	159	aaacatggtaaacccagatgggagctcccttcagtccaaaggacgagatcttctctagtccTTTGGACTGAAAGGAGCTCCCatctgggaatgtctgata	70	ppt-MIR319e,ppt-MIR319c,ppt-MIR319d,smo-MIR319,mtr-MIR319c,mtr-MIR319b,mtr-MIR319a,mtr-MIR319d,gma-MIR319c,gma-MIR319p,gma-MIR319l,gma-MIR319j,gma-MIR319h,gma-MIR319e,gma-MIR319b,gma-MIR319m,gma-MIR319k,gma-MIR319a,ptc-MIR319a,ptc-MIR319d,ptc-MIR319b,ptc-MIR319c,ath-MIR319c,ath-MIR319b,ath-MIR319a,stu-MIR319a,mdm-MIR319b,mdm-MIR319a,aly-MIR319c,aly-MIR319d,aly-MIR319a,aly-MIR319b,ppe-MIR319a,vvi-…	ppt-MIR319d	cagcgtgGAGCTTTCTTCGGTCCAATAgtggctgagtcgaaggttgtgctgctgccgactcaaacttccggcttccctatccaacccctggtatggaatccgaatgtctgatacgggagctgttcaatctccggcttagcatctCTTGGACTGAAGGGAGCTCCccgctg	ppt-miR319a	CTTGGACTGAAGGGAGCTCC	3'	Diff	gp2a	...((.(..(..((((((((((((((((.((((((((((((((((((.....)))..))))))))))))))).))))))))))))))))..)..)))...	94	48	-66.7	1.4	15	13	9.5	2248	2771	2958	14.8471	11.2244	11.1391	2177.35	3515.94	2799.55	high
24	32	mtr-miR393a_2ss12CT21CT	TCCAAAGGGATTGCATTGATT	21	contig_4310820	-	492	592	tgatctgtctgcaactggatggtTCCAAAGGGATTGCATTGATTcggctcacaccagcatgaatcatgcaatcctttaggaatcttcttgcaggtagaacg	62	mtr-MIR393a,mtr-MIR393b,gma-MIR393i,gma-MIR393c,gma-MIR393j,gma-MIR393h,gma-MIR393e,gma-MIR393a,gma-MIR393k,gma-MIR393d,gma-MIR393f,gma-MIR393g,ptc-MIR393b,ptc-MIR393a,ptc-MIR393c,ath-MIR393b,ath-MIR393a,stu-MIR393,mdm-MIR393a,mdm-MIR393f,mdm-MIR393b,mdm-MIR393c,mdm-MIR393d,mdm-MIR393e,aly-MIR393a,aly-MIR393b,ppe-MIR393a,ppe-MIR393b,vvi-MIR393b,vvi-MIR393a,mes-MIR393c,mes-MIR393b,mes-MIR393d,mes-…	mtr-MIR393b	aggcaTCCAAAGGGATCGCATTGATCccaaatctaattaagtccctagctacttaattaacaacttaatttccttaatatctcataataTTTGGGATCATGCTATCCCTTtggattcat	mtr-miR393a	TCCAAAGGGATCGCATTGATC	5'	Diff	gp2a	.(.(((..(((((...(((.((((((.((((((((((((.(((((((((......))).)))))))))))))))))).)))))).))))))))..))).).	99	45.5	-49.6	1.1	0	0	0	64	80	91	0	0	0	61.9887	101.507	86.1253	middle
25	33	gma-miR395a_1ss7TA	CTGAAGAGTTTGGGGGAACTC	21	contig_380882	-	1067	1192	aaatgttctgctcttctcgagttccctcaactacttcagaaacaacatttcatgattccacgagaatctgaatatggattgatattCTGAAGAGTTTGGGGGAACTCtggaagtcactgaacacta	105	gma-MIR395c,gma-MIR395b,gma-MIR395a,ptc-MIR395c,ptc-MIR395k,ptc-MIR395f,ptc-MIR395g,ptc-MIR395h,ptc-MIR395i,ptc-MIR395e,ptc-MIR395b,ptc-MIR395d,ptc-MIR395j,ath-MIR395d,ath-MIR395a,ath-MIR395e,stu-MIR395g,stu-MIR395h,stu-MIR395i,stu-MIR395d,stu-MIR395j,stu-MIR395f,stu-MIR395a,stu-MIR395b,stu-MIR395e,stu-MIR395c,mdm-MIR395b,mdm-MIR395d,mdm-MIR395g,mdm-MIR395i,mdm-MIR395c,mdm-MIR395e,mdm-MIR395f,mdm…	gma-MIR395a	tcaggttttccctagagttcccctgaacgcttcattaaagggctttattatcatatagtcccaagttagtccataCTGAAGTGTTTGGGGGAACTCccggtgatacttga	gma-miR395a	CTGAAGTGTTTGGGGGAACTC	3'	Diff	gp2a	...(((((....((((..((((((((((((((.((((((((.((((((((((.(((((.....))))))))).)))..)))...)))))))))).))))))))))))..)))).....)))))...	120	39.7	-49.7	1	0	0	0	0	11	5	0	0	0	0	13.9572	4.73216	middle
26	34	pta-miR396_L-3	CACAGCTTTCTTGAACTT	18	contig_1050169	+	1	170	tggagcttaaatagtgaattctgccatattttccCACAGCTTTCTTGAGCTTtgtacacagatttgctcagacaaaacattttaacaaaaatctttatcctcacctgagcactaaGTTCAAGAAAGCTGTGGAAAAgtatgacaagattctaattcttttgaatccatgg	56	pta-MIR396,pde-MIR396,smo-MIR396,mtr-MIR396a,gma-MIR396d,gma-MIR396c,gma-MIR396g,gma-MIR396b,gma-MIR396f,gma-MIR396k,ptc-MIR396d,ptc-MIR396c,ptc-MIR396e,ath-MIR396b,stu-MIR396,mdm-MIR396d,mdm-MIR396e,mdm-MIR396c,aly-MIR396b,ppe-MIR396b,vvi-MIR396b,nta-MIR396c,nta-MIR396b,mes-MIR396d,mes-MIR396f,mes-MIR396e,mes-MIR396c,atr-MIR396b,atr-MIR396e,atr-MIR396c,lus-MIR396e,lus-MIR396b,cme-MIR396c,cme-MIR…	pta-MIR396	gaatcttgtcatacttTTCCACAGCTTTCTTGAACTTtacgtgtacgggacgaggagattctgatttctacgtctgcgattaaagttcaagaaaactgtgggaaagcatggtaggattc	pta-miR396	TTCCACAGCTTTCTTGAACTT	5'	Diff	gp2a	((((..(((((....((((..((.((((((((.(((((((((((((((((((((....))....(((((((.................................)))))))..))))))))))))))))))).)))))))).))..)))).......))))).))))...	167	35.3	-56.998	0.9	21.5	31	88	227.5	316.5	164.5	21.2808	26.7658	103.183	220.35	401.587	155.688	middle
26	35	mtr-miR396a-3p_2ss2CT20GA	GTTCAAGAAAGCTGTGGGAAA	21	contig_1050169	+	1	170	tggagcttaaatagtgaattctgccatattttccCACAGCTTTCTTGAGCTTtgtacacagatttgctcagacaaaacattttaacaaaaatctttatcctcacctgagcactaaGTTCAAGAAAGCTGTGGAAAAgtatgacaagattctaattcttttgaatccatgg	56	pta-MIR396,pde-MIR396,smo-MIR396,mtr-MIR396a,gma-MIR396d,gma-MIR396c,gma-MIR396g,gma-MIR396b,gma-MIR396f,gma-MIR396k,ptc-MIR396d,ptc-MIR396c,ptc-MIR396e,ath-MIR396b,stu-MIR396,mdm-MIR396d,mdm-MIR396e,mdm-MIR396c,aly-MIR396b,ppe-MIR396b,vvi-MIR396b,nta-MIR396c,nta-MIR396b,mes-MIR396d,mes-MIR396f,mes-MIR396e,mes-MIR396c,atr-MIR396b,atr-MIR396e,atr-MIR396c,lus-MIR396e,lus-MIR396b,cme-MIR396c,cme-MIR…	mtr-MIR396a	tgcttTTCCACAGCTTTCTTGAACTTctttcgtatcttaaatctgttttcaagattaaaagtcctagaaGCTCAAGAAAGCTGTGGGAGAata	mtr-miR396a-3p	GCTCAAGAAAGCTGTGGGAGA	3'	Diff	gp2a	((((..(((((....((((..((.((((((((.(((((((((((((((((((((....))....(((((((.................................)))))))..))))))))))))))))))).)))))))).))..)))).......))))).))))...	167	35.3	-56.998	0.9	0	0	0	5	14	14	0	0	0	4.84287	17.7637	13.25	middle
27	36	pab-miR396a_1ss21AT	TTCCACAGCTTTCTTGAACTT	21	contig_1050169	-	102	242	ttagaatcttgtcatacttTTCCACAGCTTTCTTGAACTTagtgctcaggtgaggataaagatttttgttaaaatgttttgtctgagcaaatctgtgtacaaagCTCAAGAAAGCTGTGGGAAAatatggcagaattcact	116	pab-MIR396a,pab-MIR396c,pab-MIR396b,pta-MIR396,pde-MIR396,smo-MIR396,mtr-MIR396a,mtr-MIR396b,mtr-MIR396c,gma-MIR396c,gma-MIR396g,gma-MIR396b,gma-MIR396f,gma-MIR396d,gma-MIR396k,gma-MIR396i,gma-MIR396e,gma-MIR396a,gma-MIR396h,gma-MIR396j,ptc-MIR396d,ptc-MIR396c,ptc-MIR396e,ptc-MIR396b,ptc-MIR396a,ptc-MIR396f,ptc-MIR396g,ath-MIR396b,ath-MIR396a,stu-MIR396,mdm-MIR396c,mdm-MIR396d,mdm-MIR396e,mdm-MIR…	pab-MIR396a	aatcccgccatgctcTTCCACAGCTTTCTTGAACTAagagtcgatcggatccggtcagttcagagctcaagaaagctgtgggaaaacatgggcggattcg	pab-miR396a	TTCCACAGCTTTCTTGAACTA	5'	Diff	gp2a	...((((..(((((((.(((((((((((((((((((.(((.((((.(((((..(((((((((((((....))))).))))))))......))))).)))).))).))))))))))))))))))).)))))))..))))...	135	35.5	-63.9	1.3	13289.5	15822.5	15440.5	85596.5	56982	56689.5	13154	13661.4	18104.6	82906.5	72300.8	53652.8	high
27	37	mtr-miR396a-3p_L-1_1ss20GA	CTCAAGAAAGCTGTGGGAAA	20	contig_1050169	-	102	242	ttagaatcttgtcatacttTTCCACAGCTTTCTTGAACTTagtgctcaggtgaggataaagatttttgttaaaatgttttgtctgagcaaatctgtgtacaaagCTCAAGAAAGCTGTGGGAAAatatggcagaattcact	116	pab-MIR396a,pab-MIR396c,pab-MIR396b,pta-MIR396,pde-MIR396,smo-MIR396,mtr-MIR396a,mtr-MIR396b,mtr-MIR396c,gma-MIR396c,gma-MIR396g,gma-MIR396b,gma-MIR396f,gma-MIR396d,gma-MIR396k,gma-MIR396i,gma-MIR396e,gma-MIR396a,gma-MIR396h,gma-MIR396j,ptc-MIR396d,ptc-MIR396c,ptc-MIR396e,ptc-MIR396b,ptc-MIR396a,ptc-MIR396f,ptc-MIR396g,ath-MIR396b,ath-MIR396a,stu-MIR396,mdm-MIR396c,mdm-MIR396d,mdm-MIR396e,mdm-MIR…	mtr-MIR396a	tgcttTTCCACAGCTTTCTTGAACTTctttcgtatcttaaatctgttttcaagattaaaagtcctagaaGCTCAAGAAAGCTGTGGGAGAata	mtr-miR396a-3p	GCTCAAGAAAGCTGTGGGAGA	3'	Diff	gp2a	...((((..(((((((.(((((((((((((((((((.(((.((((.(((((..(((((((((((((....))))).))))))))......))))).)))).))).))))))))))))))))))).)))))))..))))...	135	35.5	-63.9	1.3	96.5	137	53	525	639.5	667	95.5161	118.288	62.1446	508.501	811.42	631.27	middle
28	38	pab-miR396b_1ss7GA	TTCCACAGCTTTCTTGAACTT	21	contig_1088146	+	564	692	cgagaatccttttctcatatttTTCCACGGCTTTCTTGAACTTgaatggtgccggactgagactgggcagagttttacttttacatgagaagCTCAAGAAAGCCGTGGGAAAatatagagggattcaga	72	pab-MIR396c,pab-MIR396b,pab-MIR396a,pta-MIR396,pde-MIR396,smo-MIR396,mtr-MIR396c,mtr-MIR396a,gma-MIR396c,gma-MIR396g,gma-MIR396b,gma-MIR396f,gma-MIR396d,gma-MIR396k,ptc-MIR396g,ptc-MIR396f,ptc-MIR396d,ptc-MIR396c,ptc-MIR396e,ath-MIR396b,stu-MIR396,mdm-MIR396g,mdm-MIR396f,mdm-MIR396c,mdm-MIR396d,mdm-MIR396e,aly-MIR396b,ppe-MIR396b,ppe-MIR396a,vvi-MIR396b,vvi-MIR396a,nta-MIR396c,nta-MIR396b,nta-MIR…	pab-MIR396b	tcatagttTTCCACGGCTTTCTTGAACTTacttcacgatcaggtctgttggcggccgatcgcatcgataacagatccgggtgacaagatcaagaaagccgtgggaaattatagagg	pab-miR396b	TTCCACGGCTTTCTTGAACTT	5'	Diff	gp2a	...((((((((((...(((((((((((((((((((((((.(((..(((...((((.......))))..((((.....))))..)))...))).)))))))))))))))))))))))))))))))))...	123	42.6	-55	1	13289.5	15822.5	15440.5	85596.5	56982	56689.5	13154	13661.4	18104.6	82906.5	72300.8	53652.8	high
28	37	mtr-miR396a-3p_L-1_1ss20GA	CTCAAGAAAGCTGTGGGAAA	20	contig_1088146	+	564	692	cgagaatccttttctcatatttTTCCACGGCTTTCTTGAACTTgaatggtgccggactgagactgggcagagttttacttttacatgagaagCTCAAGAAAGCCGTGGGAAAatatagagggattcaga	72	pab-MIR396c,pab-MIR396b,pab-MIR396a,pta-MIR396,pde-MIR396,smo-MIR396,mtr-MIR396c,mtr-MIR396a,gma-MIR396c,gma-MIR396g,gma-MIR396b,gma-MIR396f,gma-MIR396d,gma-MIR396k,ptc-MIR396g,ptc-MIR396f,ptc-MIR396d,ptc-MIR396c,ptc-MIR396e,ath-MIR396b,stu-MIR396,mdm-MIR396g,mdm-MIR396f,mdm-MIR396c,mdm-MIR396d,mdm-MIR396e,aly-MIR396b,ppe-MIR396b,ppe-MIR396a,vvi-MIR396b,vvi-MIR396a,nta-MIR396c,nta-MIR396b,nta-MIR…	mtr-MIR396a	tgcttTTCCACAGCTTTCTTGAACTTctttcgtatcttaaatctgttttcaagattaaaagtcctagaaGCTCAAGAAAGCTGTGGGAGAata	mtr-miR396a-3p	GCTCAAGAAAGCTGTGGGAGA	3'	Diff	gp2a	...((((((((((...(((((((((((((((((((((((.(((..(((...((((.......))))..((((.....))))..)))...))).)))))))))))))))))))))))))))))))))...	123	42.6	-55	1	96.5	137	53	525	639.5	667	95.5161	118.288	62.1446	508.501	811.42	631.27	middle
29	39	pab-miR396b_L-3	CACGGCTTTCTTGAACTT	18	contig_1088146	-	632	760	tctgaatccctctatattttccCACGGCTTTCTTGAGCTTctcatgtaaaagtaaaactctgcccagtctcagtccggcaccatTCAAGTTCAAGAAAGCCGTGGaaaaatatgagaaaaggattctcg	6	pab-MIR396c,pab-MIR396b,pde-MIR396,ptc-MIR396g,atr-MIR396d,tcc-MIR396d,	pab-MIR396b	tcatagttTTCCACGGCTTTCTTGAACTTacttcacgatcaggtctgttggcggccgatcgcatcgataacagatccgggtgacaagatcaagaaagccgtgggaaattatagagg	pab-miR396b	TTCCACGGCTTTCTTGAACTT	5'	Diff	gp2a	...(((((((((.(((((((.(((((((((((((((((((...(((....((.....)).((((............)))).)))..))))))))))))))))))).))))))))))....))))))...	123	42.6	-49.3	0.9	15.5	29.5	46.5	68	107	63.5	15.342	25.4707	54.5231	65.863	135.765	60.0984	middle
29	40	pde-MIR396-p3_1ss2GA	TAAAGTTCAAGAAAGCCGTGG	21	contig_1088146	-	632	760	tctgaatccctctatattttccCACGGCTTTCTTGAGCTTctcatgtaaaagtaaaactctgcccagtctcagtccggcaccatTCAAGTTCAAGAAAGCCGTGGaaaaatatgagaaaaggattctcg	6	pab-MIR396c,pab-MIR396b,pde-MIR396,ptc-MIR396g,atr-MIR396d,tcc-MIR396d,	pde-MIR396	tttTCCCACGGCTTTCTTGAACTTctcattcggaactgttatcagtgcgtccggccgatgcccacagaactcatcatgaagttcaagaaagccgtggaaaaatataa	pde-MIR396-p3	tgaagttcaagaaagccgtgg	3'	New	gp2a	...(((((((((.(((((((.(((((((((((((((((((...(((....((.....)).((((............)))).)))..))))))))))))))))))).))))))))))....))))))...	123	42.6	-49.3	0.9	0	7	5	0	4.5	0	0	6.0439	5.86269	0	5.70976	0	low
30	41	pab-miR396a_L+1R-1	TTTCCACAGCTTTCTTGAACT	21	contig_1807410	-	7	142	atctttaagaaacctgtggaatgctaggatagtgtttcatagattttgaacttaggcacattctaacttgttttatttttcctcttccacataacatcgagctcaaaatactttTTTCCACAGCTTTCTTGAACCa	112	pab-MIR396a,pab-MIR396c,pab-MIR396b,pta-MIR396,smo-MIR396,mtr-MIR396a,mtr-MIR396b,mtr-MIR396c,gma-MIR396c,gma-MIR396g,gma-MIR396b,gma-MIR396f,gma-MIR396d,gma-MIR396k,gma-MIR396i,gma-MIR396e,gma-MIR396a,gma-MIR396h,ptc-MIR396d,ptc-MIR396c,ptc-MIR396e,ptc-MIR396g,ptc-MIR396b,ptc-MIR396f,ptc-MIR396a,ath-MIR396b,ath-MIR396a,stu-MIR396,mdm-MIR396e,mdm-MIR396c,mdm-MIR396d,mdm-MIR396g,mdm-MIR396f,mdm-MI…	pab-MIR396a	aatcccgccatgctcTTCCACAGCTTTCTTGAACTAagagtcgatcggatccggtcagttcagagctcaagaaagctgtgggaaaacatgggcggattcg	pab-miR396a	TTCCACAGCTTTCTTGAACTA	3'	Diff	gp2a	...(((((((((.((((((((...((((((.((((((((.......)))).....))))))))))........((((((..(((..............)))...)))))).....)))))))).)))))))))...	130	33.8	-30.1	0.7	1081.5	1215	441	3781	2897	3103	1070.47	1049.05	517.09	3662.18	3675.82	2936.78	high
31	42	hvu-MIR397a-p5_2ss8TG20GA	CGTTGAGGGCAGCGTTGATA	20	contig_4553829	-	329	435	taacaaatgcatCGTTGAGGGCAGCGTTGATAtttcaatatgtcagctggtctgcattggttgcttacattagaattTCAATGCTGCTCTCAATAATGtgtttggaa	2	lus-MIR397b,hvu-MIR397a,	hvu-MIR397a	cgcagaggtgCCGTTGAGTGCAGCGTTGATGaaccgtccggccatggcccgtccgcctccaccgaggccggagcggttcaccggcgctgcacgcaatgacgcctctgctttct	hvu-MIR397a-p5	CGTTGAGTGCAGCGTTGATG	5'	New	gp2a	...((((..(((..((((((((((((((((...(((...((((((((..((....))..))))...))))..)))..))))))))))))))))..)))..))))...	101	38.3	-47.6	1.2	0	12	18	0	0	0	0	10.361	21.1057	0	0	0	middle
31	43	lus-MIR397b-p3_2ss1GT20CT	TCAATGCTGCTCTCAATAATG	21	contig_4553829	-	329	435	taacaaatgcatCGTTGAGGGCAGCGTTGATAtttcaatatgtcagctggtctgcattggttgcttacattagaattTCAATGCTGCTCTCAATAATGtgtttggaa	2	lus-MIR397b,hvu-MIR397a,	lus-MIR397b	gagaaacctcATTGAGTGCAGCGTTGATGAAattcatcccttttgcagtcgggaggatcttcagcaatgctgctctcaataacgcttctc	lus-MIR397b-p3	gcaatgctgctctcaataacg	3'	New	gp2a	...((((..(((..((((((((((((((((...(((...((((((((..((....))..))))...))))..)))..))))))))))))))))..)))..))))...	101	38.3	-47.6	1.2	0	5	0	0	0	0	0	4.31707	0	0	0	0	low
32	44	pab-miR397_2ss20CT21GT	TCATTGAGTGCAGCGTTGATT	21	contig_4338238	+	461	564	taacaaatacaTCATTGAGTGCAGCGTTGATTggatttgaatgaactgctctgatgattattctgcaataactgtcaaggctgcactcaataatgcgtttgcat	40	pab-MIR397,mtr-MIR397,gma-MIR397a,gma-MIR397b,ptc-MIR397a,ptc-MIR397b,ath-MIR397a,ath-MIR397b,stu-MIR397,mdm-MIR397a,mdm-MIR397b,aly-MIR397a,aly-MIR397b,ppe-MIR397,vvi-MIR397a,nta-MIR397,mes-MIR397,atr-MIR397b,atr-MIR397a,lus-MIR397b,lus-MIR397a,cme-MIR397,bna-MIR397a,bna-MIR397b,tcc-MIR397,sly-MIR397,rco-MIR397,lja-MIR397,csi-MIR397,ssl-MIR397,dpr-MIR397,osa-MIR397a,osa-MIR397b,bdi-MIR397a,bdi-M…	pab-MIR397	agccgtggcaaccacaTCATTGAGTGCAGCGTTGACGatagaaattccaccaatagatttgataatatctatctatttgtggaatgccattgatattgttaaccctgcactcaatagtatgtttgccaatggct	pab-miR397	TCATTGAGTGCAGCGTTGACG	5'	Diff	gp2a	...((((..(((.((((((((((((.(((((.....(((...(((....((....))...)))..))).....))))).)))))))))))).)))..))))...	98	37.5	-36.7	0.9	490	1348	5213	2560	3235	3211	485.004	1163.88	6112.45	2479.55	4104.68	3038.99	high
33	45	pab-miR397_L-1R-1_1ss2CT	TATTGAGTGCAGCGTTGAC	19	contig_4338238	-	521	626	catgcaaacgcatTATTGAGTGCAGCCTTGACagttattgcagaataatcatcagagcagttcattcaaatccaatcaacgctgcactcaatgatgtatttgttaa	4	pab-MIR397,lus-MIR397a,lja-MIR397,osa-MIR397b,	pab-MIR397	agccgtggcaaccacaTCATTGAGTGCAGCGTTGACGatagaaattccaccaatagatttgataatatctatctatttgtggaatgccattgatattgttaaccctgcactcaatagtatgtttgccaatggct	pab-miR397	TCATTGAGTGCAGCGTTGACG	5'	Diff	gp2a	...(((((..((((((((((((((((.((((......(((..((((..((....))...))))...)))......)))).))))))))))))))))..)))))...	100	37.7	-38.4	1	8	39	85	0	0	0	7.91843	33.6732	99.6658	0	0	0	middle
34	46	mtr-miR398a-3p_L+1R-1	TTGTGTTCTCAGGTCACCCCT	21	contig_2438646	-	102	267	caaattggaaagttgcaggcagagtgaggccaacaggagtaaacctgataacacatgcacatttctgctgacatagcacagaaaagcatttgagttataaatatttgcagaagcacggcATGTGTTCTCAGGTCACCCCTgtcggagctgtctgctgtccaatccc	42	mtr-MIR398a,mtr-MIR398c,mtr-MIR398b,gma-MIR398a,gma-MIR398b,gma-MIR398d,gma-MIR398c,ptc-MIR398a,ptc-MIR398b,ptc-MIR398c,ath-MIR398a,gra-MIR398,stu-MIR398b,mdm-MIR398a,mdm-MIR398b,mdm-MIR398c,aly-MIR398a,ppe-MIR398a,vvi-MIR398a,vvi-MIR398c,vvi-MIR398b,nta-MIR398,lus-MIR398a,cme-MIR398b,cme-MIR398a,tcc-MIR398b,tcc-MIR398a,cpa-MIR398,ghr-MIR398,rco-MIR398a,rco-MIR398b,csi-MIR398,cca-MIR398,aqc-MIR39…	mtr-MIR398a	tctcagaGGAGTGACACTGAGAACACAAGattgattaatcatataatgtatttggttgttactagttgatttTGTGTTCTCAGGTCACCCCTTtgagt	mtr-miR398a-3p	TGTGTTCTCAGGTCACCCCTT	3'	Diff	gp2a	...((((((.....((((((((.......((.(((((.((..((((((.(((((((((...(((((((....(((((.((((......)))).)))))........)))))))....))))))))).)))))).)).))))).))..))))))))..))))))...	160	46.4	-65.5	0.9	93	128	199	112	129	122	92.0518	110.517	233.335	108.48	163.68	115.465	middle
35	47	mtr-miR399l	TGCCAAAGGAGAGTTGCCCTG	21	contig_1039123	-	471	595	tcaaaatagatgcaggggataattacgggggaactcttctttggcgggcaacattcgctatgttcctctgtttccTGCCAAAGGAGAGTTGCCCTGcaattgttctctgcacaaatctgtttaag	36	mtr-MIR399l,mtr-MIR399p,gma-MIR399b,gma-MIR399a,gma-MIR399h,gma-MIR399c,ptc-MIR399a,ath-MIR399c,ath-MIR399b,ath-MIR399d,gra-MIR399,mdm-MIR399i,mdm-MIR399j,aly-MIR399c,aly-MIR399b,aly-MIR399i,aly-MIR399d,aly-MIR399g,vvi-MIR399c,vvi-MIR399b,mes-MIR399f,cme-MIR399a,tcc-MIR399i,tcc-MIR399h,ghr-MIR399e,rco-MIR399a,csi-MIR399d,vun-MIR399a,pvu-MIR399a,osa-MIR399d,sbi-MIR399d,sbi-MIR399i,zma-MIR399j,zma-…	mtr-MIR399l	aacaatagggcacctctctcctggcaagtaaaaagggctcagtgccaataactTGCCAAAGGAGAGTTGCCCTGtggct	mtr-miR399l	TGCCAAAGGAGAGTTGCCCTG	3'	Yes	gp2a	...(((((((((((((((((((((.(((((.(((((((((((((((((.((((...............)))).))))))))))))))))).))))).))))))))))))))....)))))))...	119	45.6	-65.5	1.1	0	0	0	7	7.5	6.5	0	0	0	6.78001	9.51627	6.15181	low
36	47	mtr-miR399l	TGCCAAAGGAGAGTTGCCCTG	21	contig_3866105	-	706	813	ggtaattacgggggaattcttctttggcaggtaacagttaagtcctcaactaataattgtgggttctttcattgtttccTGCCAAAGGAGAGTTGCCCTGtaattgtg	27	mtr-MIR399l,mtr-MIR399p,gma-MIR399b,gma-MIR399c,gma-MIR399h,gma-MIR399a,ath-MIR399c,ath-MIR399b,gra-MIR399,mdm-MIR399j,mdm-MIR399i,aly-MIR399c,aly-MIR399b,vvi-MIR399c,vvi-MIR399b,mes-MIR399f,tcc-MIR399i,rco-MIR399a,csi-MIR399d,vun-MIR399a,pvu-MIR399a,osa-MIR399d,sbi-MIR399d,sbi-MIR399i,zma-MIR399e,zma-MIR399i,zma-MIR399j,	mtr-MIR399l	aacaatagggcacctctctcctggcaagtaaaaagggctcagtgccaataactTGCCAAAGGAGAGTTGCCCTGtggct	mtr-miR399l	TGCCAAAGGAGAGTTGCCCTG	3'	Yes	gp2a	..(((((((((((.(((((((((((((((((.((((((.(((..((((.(........)))))..)))..)))))).))))))))))))))))).)))))))))))..	104	41.7	-56.1	1.2	0	0	0	7	7.5	6.5	0	0	0	6.78001	9.51627	6.15181	low
37	48	mtr-miR399l_1ss20TC	TGCCAAAGGAGAGTTGCCCCG	21	contig_3163556	+	2039	2109	actggacaactcacctctggcagataactgttgattaattcattgttaccTGCCAAAGGAGAGTTGCCCCG	36	mtr-MIR399l,mtr-MIR399p,gma-MIR399b,gma-MIR399a,gma-MIR399h,gma-MIR399c,ptc-MIR399a,ath-MIR399c,ath-MIR399b,ath-MIR399d,gra-MIR399,mdm-MIR399i,mdm-MIR399j,aly-MIR399i,aly-MIR399c,aly-MIR399b,aly-MIR399d,aly-MIR399g,vvi-MIR399c,vvi-MIR399b,mes-MIR399f,cme-MIR399a,tcc-MIR399h,tcc-MIR399i,ghr-MIR399e,rco-MIR399a,csi-MIR399d,vun-MIR399a,pvu-MIR399a,osa-MIR399d,sbi-MIR399d,sbi-MIR399i,zma-MIR399j,zma-…	mtr-MIR399l	aacaatagggcacctctctcctggcaagtaaaaagggctcagtgccaataactTGCCAAAGGAGAGTTGCCCTGtggct	mtr-miR399l	TGCCAAAGGAGAGTTGCCCTG	3'	Diff	gp2a	...((.((((((.(((.((((((.((((...(((.....)))..)))).)))))).))).))))))))...	65	46.5	-31.4	1	0	0	0	2.5	4.5	2.5	0	0	0	2.42143	5.70976	2.36608	low
38	49	pta-miR408_R+1	ATGCACTGCCTCTTCCCTGGCT	22	contig_3024631	+	265	366	tttaggcagccgggaagagacggcgcatgggaattgcagttacagaaaaacattgtctgtatcttccattctcATGCACTGCCTCTTCCCTGGCTgcttctg	42	pta-MIR408,ppt-MIR408b,smo-MIR408,mtr-MIR408,gma-MIR408b,gma-MIR408d,gma-MIR408c,gma-MIR408a,ptc-MIR408,ath-MIR408,stu-MIR408b,stu-MIR408a,mdm-MIR408a,mdm-MIR408b,mdm-MIR408d,aly-MIR408,vvi-MIR408,nta-MIR408,mes-MIR408,lus-MIR408a,cme-MIR408,cpa-MIR408,rco-MIR408,csi-MIR408,cca-MIR408,hbr-MIR408b,hbr-MIR408a,ahy-MIR408,vun-MIR408,dpr-MIR408,osa-MIR408,bdi-MIR408,sbi-MIR408,zma-MIR408b,zma-MIR408a…	pta-MIR408	gagacagggacgagttagggcatgggagttgcatatgcagaaacgtctgcttctgccattcttATGCACTGCCTCTTCCCTGGCtc	pta-miR408	ATGCACTGCCTCTTCCCTGGC	3'	Diff	gp2a	...((((((((((((((((.(((.((((((((((...((.((((((.........)))))).))...)))))))))).))).)))))))).))))))))...	96	50	-54	1.1	2048	4273	2505	87	21	68	2027.12	3689.37	2937.21	84.2659	26.6456	64.3574	high
39	50	ppt-MIR477a-p5_2ss14AC19TA	TCCTCTCCCTCAACGGCTACC	21	contig_2522749	-	154	291	tgctggaagaagtgtttcttTCCTCTCCCTCAACGGCTACCaataattttgtctgaaatttttgattttttaagaaaggttgaggaaggcagttttggatgccgttgaggaggggtaaaataagactatctttcaaac	4	ppt-MIR477a,ppt-MIR477c,ppt-MIR477d,ppt-MIR477b,	ppt-MIR477a	gttgctttttcCTCTCCCTCAAAGGCTTCCAacatgatgtgcgtaagccacaacgttAGAAGCCTTTGTGGGAGAGGAagaaaca	ppt-MIR477a-p5	tcCTCTCCCTCAAAGGCTTCC	5'	New	gp2a	...((((((((((.((..((((((((.((((((((((..((((.....((((((....(..(..(..(((....)))..)..)..)))))))..))))..))))))))))))))).)))..)).))).)))))))...	132	38.4	-49.4	0.9	21	32	16	17	7	19	20.7859	27.6293	18.7606	16.4657	8.88185	17.9822	middle
40	51	ppt-MIR477a-p5_2ss14AC17CT	TCCTCTCCCTCAACGGTTTCCA	22	contig_265020	-	1288	1422	gctggaagaagtgtttcttTCCTCTCCCTCAACGGTTTCCAatgattttgtctgaaatttttgattttttacaaaatgttgaggaaggcagttttggatgccgttggggaggggaaaaatcaactatctttcaaa	4	ppt-MIR477a,ppt-MIR477c,ppt-MIR477d,ppt-MIR477b,	ppt-MIR477a	gttgctttttcCTCTCCCTCAAAGGCTTCCAacatgatgtgcgtaagccacaacgttAGAAGCCTTTGTGGGAGAGGAagaaaca	ppt-MIR477a-p5	tcCTCTCCCTCAAAGGCTTCCA	5'	New	gp2a	..((((((((((.....(((((((((((.((((((..(((((.....((((((..((((((((........))))).))).....))))))..)))))..))))))))))))))))).....))).)))))))..	131	38.5	-52.6	1	26	24	0	128	27	73	25.7349	20.7219	0	123.977	34.2586	69.0895	middle
41	52	stu-miR477b-5p_2ss8CT20TA	ACTCTCCTTCAAAGGCTTCAG	21	contig_522490	-	931	998	aACTCTCCTTCAAAGGCTTCAGaaatctctttttgttgaagtttttttggagcctttgagggggacat	2	stu-MIR477b,aqc-MIR477f,	stu-MIR477b	ACTCTCCCTCAAAGGCTTCTGgcttaaaatgccttttgtgctaatgctaGAGGTCTTTCGAGTGAGAGTGA	stu-miR477b-5p	ACTCTCCCTCAAAGGCTTCTG	5'	Diff	gp2a	...((((((((((((((((((((((...((((.....))))..))))))))))))))))))))))...	62	39.7	-35.9	1.3	40	76	47	17	11	16	39.5922	65.6195	55.1093	16.4657	13.9572	15.1429	middle
42	53	ppt-MIR477d-p5_2ss1CA18TC	ACTCTCCCTCAAAGGCTCCC	20	contig_809269	+	886	991	aaatgaggaaggtgctatttACTCTCCCTCAAAGGCTCCTaaaatttctgagagtggagattagaggaggctttggggctgagtatcagagcacctgatctcactt	11	ppt-MIR477d,ppt-MIR477e,ppt-MIR477a,ppt-MIR477c,ppt-MIR477b,stu-MIR477b,ppe-MIR477,vvi-MIR477a,mes-MIR477i,mes-MIR477g,mes-MIR477f,	ppt-MIR477d	gttgatttcgattaaacagattgcttgttcCTCTCCCTCAAAGGCTTCCAacaacaggtacttggtcttgttttcaccagcaaagctaaggcccgtcccagatgttagaagcctctgggggtgacgaagcagcagctgtatgggtggttcccat	ppt-MIR477d-p5	cCTCTCCCTCAAAGGCTTCC	5'	New	gp2a	...(((((.(((((((...(((((..((((((((.(((((..(((((((......)))))))..))))).))))))))..)))))....)))))))..)))))...	100	45.3	-53.2	1.1	131	178	29	125	46	43	129.664	153.688	34.0036	121.072	58.3664	40.6966	middle
43	54	gma-miR482a-3p_L-2_2ss5CG20TA	TTGCCAATTCCGCCCATACCTA	22	contig_1159522	+	1357	1461	ttgttcttaatgctctggtaggtattgccggattggcaaagctttcattttattcgttgttggttTTGCCAATTCCGCCCATACCTAtcatgtcactaagaaatt	9	pab-MIR1311,pta-MIR1311,pde-MIR1311,gma-MIR482c,gma-MIR482a,stu-MIR482e,sly-MIR482c,vun-MIR482,pvu-MIR482,	gma-MIR482a	tcAGAATTTGTGGGAATGGGCTGAttgggaagcaatgtgtgctggtgcaatgcatttaattTCTTCCCAATTCCGCCCATTCCTAtgatttctga	gma-miR482a-3p	TCTTCCCAATTCCGCCCATTCCTA	3'	Diff	gp2a	...((((((.((...((((((((((.((.((((((((((((((..((..........))..)))))))))))))).))..))))))))))...)).))))))...	99	39	-41	1	0	0	5	0	0	5	0	0	5.86269	0	0	4.73216	low
44	55	ptc-miR482c-3p_2ss9AG20AG	TCTTTCCGGGTCCTCCCATGCC	22	contig_117362	+	657	782	agagagggatcatctgtaggaggaggacattaggcctgggacgagcggaaagactccttccaagctatgaagtgcagTCTTTCCGGATCCTCCCATGCCtatagccctccctacacatccctcttt	2	ptc-MIR482c,ppe-MIR482a,	ptc-MIR482c	tcctccgccgtgttggaaaggaaagggagactgctttactggaagcttccggTATGGGAGAGGCGGGAATGACTctgaaagaacttagaagagTCTTTCCGAGTCCTCCCATACCgcagatttccagtagttcctccctttacttatcttcactattccagcagctctgga	ptc-miR482c-3p	TCTTTCCGAGTCCTCCCATACC	3'	Diff	gp2a	((((((((((....((((((..(.((....(((((.(((((.((.((((((((((.((((........))))...))))))))))..)).))))).)))))...)))..)))))).))))))))))	126	53.2	-62.9	0.9	27	17	0	46	39	41	26.7247	14.678	0	44.5544	49.4846	38.8037	middle
45	56	ppt-miR529d_L+1R-1_1ss21CT	CAGAAGAGAGAGAGCACAGCT	21	contig_1140401	+	2618	2719	ttttttcagaaacatcaacagCAGAAGAGAGAGAGCACAGCTtctgcccttagcgactagaagctgtgctcctctcttctcgtgttggcttatctgaagttt	6	ppt-MIR529d,osa-MIR529b,bdi-MIR156a,far-MIR156a,far-MIR156b,far-MIR529,	ppt-MIR529d	ctagcttctccacaatttctcaccctcgttgggatcAGAAGAGAGAGAGCACAGCCCgatgtccaatgttcaggtcgaatgggctgtgctctctctcttcttgctccaacttgggtgctacacgcatctagggtac	ppt-miR529d	AGAAGAGAGAGAGCACAGCCC	5'	Diff	gp2a	...(((((((....((((((..(((((((((.(((((((((((((((.....))....))))))))))))))))))))))..))))))....)))))))...	96	45.1	-51.2	1.1	0	0	0	2030	1705.5	1691.5	0	0	0	1966.2	2164	1600.89	middle
46	57	ppt-miR529d_2ss17AC21CT	AGAAGAGAGAGAGCACCGCCT	21	contig_2035809	-	1016	1116	tctgagccAGAAGAGAGAGAGCACCGCCTgtttgtttgttgcatctattattattataatggattagagcacagcaggtgctctctctcttctcgttccgt	12	ppt-MIR529d,ppt-MIR529b,ppt-MIR529a,ppt-MIR529c,osa-MIR529a,bdi-MIR156a,bdi-MIR529,sbi-MIR529,zma-MIR529,far-MIR156a,far-MIR156b,far-MIR529,	ppt-MIR529d	ctagcttctccacaatttctcaccctcgttgggatcAGAAGAGAGAGAGCACAGCCCgatgtccaatgttcaggtcgaatgggctgtgctctctctcttcttgctccaacttgggtgctacacgcatctagggtac	ppt-miR529d	AGAAGAGAGAGAGCACAGCCC	5'	Diff	gp2a	...((((.(((((((((((((((((..((((..((((.....(((((((((....)))))))))..))))))))..))))))))))))))))).))))...	95	44.6	-50.3	1.1	123	244	576	102	41.5	44.5	121.746	210.673	675.382	98.7945	52.6567	42.1162	middle
47	58	ppt-miR529e_1ss20CT	AGAAGAGAGAGAGTACAGCTC	21	contig_2710560	+	1	81	tgtagaAGAAGAGAGAGAGTACAGCCCaacaccctctatgttcagttttgcgagggctgtactatctctcttcttctgtta	7	ppt-MIR529f,ppt-MIR529e,osa-MIR529a,osa-MIR529b,bdi-MIR529,sbi-MIR529,zma-MIR529,	ppt-MIR529e	tcagcaatttactcactcatgctgggatcAGAAGAGAGAGAGTACAGCCCaagagcaaccgcttagttggaatgggctgtgctctctctcttctggttccaacctgagtgcatgtcggttgt	ppt-miR529e	AGAAGAGAGAGAGTACAGCCC	5'	Diff	gp2a	..((((((((((((((.((((((((((........((......))........)))))))))).))))))))))))))...	76	44.4	-40.4	1.1	13	15	0	3131	3052	2502	12.8675	12.9512	0	3032.6	3872.49	2367.97	high
48	59	pab-miR535	TGACAACGAGAGAGAGCACGC	21	contig_3058924	-	363	457	agctcaggTGACAACGAGAGAGAGCACGCttgtcagcattcatgcaggagacatggctgtttacaggagtgttgtctttcgttgtcacctgattt	23	pab-MIR535,ppt-MIR535b,ppt-MIR535d,ppt-MIR535c,ppt-MIR535a,mdm-MIR535a,mdm-MIR535c,mdm-MIR535d,mdm-MIR535b,ppe-MIR535a,ppe-MIR535b,vvi-MIR535a,vvi-MIR535b,vvi-MIR535c,mes-MIR535b,mes-MIR535a,atr-MIR535,tcc-MIR535,cpa-MIR535,rco-MIR535,csi-MIR535,aqc-MIR535,osa-MIR535,	pab-MIR535	aaatatccgttctattccattgcTGACAACGAGAGAGAGCACGCctgtattctcttatatgaattttgcatatgtgggcgtccatgcgtgctctctgcttgtagtcagcaaagcgactgcatctcaact	pab-miR535	TGACAACGAGAGAGAGCACGC	5'	Yes	gp2a	...((((((((((((((((((.(((((.(((((.((((..((((.......))))..)))).))))).))))).))))))))))))))))))...	89	48.4	-54.3	1.2	51097	57455	14375	22890	12323	10793	50576	49607.5	16855.2	22170.6	15635.9	10214.8	high
49	60	ppt-MIR894-p3_1ss10GA	TTTCACGTCAGGTTCACCA	19	contig_360905	+	1850	1921	aaaggtgaactaatggaaatgaaagtaaaaagaaacaagaatgaactagtaTTTCACGTCAGGTTCACCAat	1	ppt-MIR894,	ppt-MIR894	cataattcaaataatccaaaaaaaataaaccaaataccttccacctcaagCGTTTCACGTCGGGTTCACCaaatatgttgtattatgtgaagttttgattgagaatgcaccgagcacttggctatggaaggtaaaagaaaattgcaacaaaaagtcctaacaatccaataggattatagaaaatttataattaaacgttaacaatcataatcaaacaata	ppt-MIR894-p3	TTTCACGTCGGGTTCACCa	3'	New	gp2a	...((((((((.(((((((((..(((..................)))..)))))).)))..))))))))...	66	31.9	-18.1	0.8	643	575	721	144	61	86	636.444	496.463	845.401	139.475	77.399	81.3932	middle
50	61	smo-MIR1083-p5_2ss1TC20GC	CAGCCTGGAACGAAGCACGC	20	contig_2934792	-	1682	1794	tcatggcgcatggaaatccaCAGCCTGGAACGAAGCACGCtctctctttcttttacgatatcaagatagatagcgtgtttcgtttcaggcttatgcattttcatacgtcaaca	1	smo-MIR1083,	smo-MIR1083	tgggagctcaTAGCCTGGAACGAAGCACGGTtgtgcttggtttctcgagccatccataaaatcgcgcttcgtttcatgctatgcgcgtccatgat	smo-MIR1083-p5	TAGCCTGGAACGAAGCACGG	5'	New	gp2a	...(((((.((((((((.((.((((((((((((((((((((...(((.((((..........)))).))).))))))))))))))))))))..)).)))))))).)))))...	107	43.4	-51.4	1	2642	4255	2042	19780	27240	31132	2615.06	3673.83	2394.32	19158.4	34563.1	29464.3	high
51	62	smo-MIR1103-p3	TGGGTGACCTCCCGGGAA	18	contig_1512460	+	921	1045	gggactttcggagaggtcacccaccccaatactactccaggtcgggcgcacttaactgcctggctctgataccatgttacctctcgacctggagtagtagtaggaTGGGTGACCTCCCGGGAAgt	1	smo-MIR1103,	smo-MIR1103	gcccatgaacAAGAGTGCACCCCCTTTCCAATcggttaaaggtcttaggatagttggagtttaagcgtccttgggtttgaatagtactgggctgggtgacctcccgggaagtccaaattcaggagcttacattaaccccaagtattccaaaacgcttaatcgatTGGAAAAAGGAGGTGCATTCTTGTtcataggccc	smo-MIR1103-p3	tgggtgacctcccgggaa	3'	New	gp2a	...((((((((.(((((((((((.((...(((((((((((((((((.(((......))).(((........)))........)))))))))))))))))...)).))))))))))))))).))))	122	56.8	-68.3	1	58	130	369	102	78	374	57.4086	112.244	432.667	98.7945	98.9692	353.966	middle
52	63	pta-miR1314_R-4_1ss9GA	TCGGCCTTAAATGTTAGG	18	contig_2015767	+	606	763	tcgattcgatggagatgacctgttgaagggtgaaagattgttcactgacattggaggccgacgcaaacacagtctgcatactctcgcagttgtaatgTCGGCCTTAAATGTTAGGtgaggttttttcgctctgttaacacgccatctcgccgaatgtt	1	pta-MIR1314,	pta-MIR1314	aattccaattccaattgataacatgttagttagctgaagagattcttcaacattagaggccaatatagaataatattcttattcttaaTCGGCCTTGAATGTTAGGAGAAcgttttcctctacctaagcatgctatctcaaaggagtttaaggagtgg	pta-miR1314	TCGGCCTTGAATGTTAGGAGAA	3'	Diff	gp2a	...(((((...((((((...(((((((((((((((((...((((((((((((..(((((((((.....((((.((((........))))))))..)))))))))..))))))).)))))..))))))))))).))))))...))))))..)))))...	152	46.8	-65.9	0.9	10	0	0	0	0	0	9.89804	0	0	0	0	0	low
53	64	mtr-MIR2118-p5_2ss7AC20CG	TATGGGCGGATCGGTAAAAGA	21	contig_3081691	+	367	525	gcagagatggaagagaagagagagggatgtgatgtagagacaggccctttagTATGGGCGGATCGGTAAAAGActctcttcattctactattcttttccctgaaccgcccatacctgatgtcctctctacgcatccccttccttccttccctaatccag	1	mtr-MIR2118,	mtr-MIR2118	agagagagaaagggaaagggtgaaagagcttgaggaagttatgggatatgggaggatcggtaaaacagatctaattcatctgaattgaataatttctTTACCGATTCCACCCATTCCTAttatttccttttgttcctctctttccactctcctctccat	mtr-MIR2118-p5	tatgggaggatcggtaaaaca	5'	New	gp2a	...((...(((((.((((..((.(((((((...(((((((..(((...(((((((((((((.((((.((((((..................)))))).)).)).)))))))))).))).))).))))))))))))))))..)))))))))....))...	153	49.1	-63.8	0.8	79	52	30	50	31	28	78.1945	44.8976	35.1762	48.4287	39.3339	26.5001	middle
54	65	gma-MIR4995-p5_1ss1AT	TTAGGCAGTGGCTTGGTTA	19	contig_1334608	+	680	850	aagcttcatccatccaattatgttggttctacaggaggattTTAGGCAGAGGCTTGGTTAgtgagcttgagaggatgcgtcaagctattctagtgtactagaaaaacaaaggcttgtgctatgattcatcttctgagagatggagcgagtgttggtggaggaaagaggaga	1	gma-MIR4995,	gma-MIR4995	taaaactcatAGGCAGTGGCTTGGTTAAGGGaagccactggagccgtagtaaaagcaagtcttcaccgggcaattgtttatggacccgaa	gma-MIR4995-p5	atAGGCAGTGGCTTGGTTA	5'	New	gp2a	...((((.(((.((((...(..((.(((((((((((((...(((((((.((((((.(((....(((((((.........))))))).((((((....)))))).)))..)))))).)))).)))....))))))).....)))))).))..)...)))))))..))))...	165	43.9	-53.3	0.7	0	10	0	15	0	27	0	8.63414	0	14.5286	0	25.5537	middle
1	1	mdm-MIR156ac-p3_2ss1AG18GC	GATCTAATTCATAAAATCA	19	contig_1152680	-	1983	2026	ataaatgtttcatGATCTAATTCATAATATCAtggaagattatt	1	mdm-MIR156ac,	mdm-MIR156ac	caatctctaatcatattatagtattaaatttagggtaaggactagggaactgggagagagaaagagcagggagtggtgatacgttgtTGACAGAAGATAGAGAGCACagatggatgacttgcaatggactatgcatctcactcctttgtgctctctatgcttctgtcatcacctagctatatccagcttccctgcccctcccccacacccctgcacctcccatattaatctaattcataaaatgattatttgattg	mdm-MIR156ac-p3	aatctaattcataaaatga	3'	New	gp2b	...(((.(((((((((............))))))))).)))...	38	20.5	-8.7	1	0	0	0	0	3.5	3	0	0	0	0	4.44093	2.8393	low
2	1	mdm-MIR156ac-p3_2ss1AG18GC	GATCTAATTCATAAAATCA	19	contig_3345207	-	865	901	cccttaaatcatatatctGATCTAATTCAAAAAATCA	1	mdm-MIR156ac,	mdm-MIR156ac	caatctctaatcatattatagtattaaatttagggtaaggactagggaactgggagagagaaagagcagggagtggtgatacgttgtTGACAGAAGATAGAGAGCACagatggatgacttgcaatggactatgcatctcactcctttgtgctctctatgcttctgtcatcacctagctatatccagcttccctgcccctcccccacacccctgcacctcccatattaatctaattcataaaatgattatttgattg	mdm-MIR156ac-p3	aatctaattcataaaatga	3'	New	gp2b	...(((.((((......)))).)))............	22	24.3	-1.3	0.1	0	0	0	0	3.5	3	0	0	0	0	4.44093	2.8393	low
3	2	gma-MIR156z-p3_2ss9GA20CT	AAACCCAAATTGGAGCTCTTA	21	contig_2398462	+	827	991	tttggttcctcgcatttcatatcttgagaatctgtttgggtcgaaggctaatctatccaaaggtctcaaaagggcacctgggcttctgatttccgatgtagaaaagctgctgAAACCCAAATTGGAGCTCTTAaaagaatatggatttcaaggtgagttgctctt	1	gma-MIR156z,	gma-MIR156z	taaacccaagttggagctctcagcactccagtgttgaaggaagtgatggtaaaccctagctgctaattcatggttacctttggtttcacataaggaagcatgtgaagtcatgggtctgcatgaacttggagatggggttgccttgatcttttagtATTGGAGTGAAGGGAGCTcctaattaggcctt	gma-MIR156z-p3	aaacccaagttggagctctca	3'	New	gp2b	...(((..(((((..(((((((((((((..((..(((((((((..((((..(((((....(((((((....))).))))(((.........)))...)))))..))))..)))..))))))..))..)))....))).))))))).......)))))..)))...	159	41.8	-44.6	0.6	5	0	0	0	9	0	4.94902	0	0	0	11.4195	0	middle
4	3	cca-MIR156c-p3_2ss7CT17AT	AGAGCATTGAGAGGACTT	18	contig_263331	-	95	140	tttggtccatattcggtgcggacattAGAGCATTGAGAGGACTTtt	1	cca-MIR156c,	cca-MIR156c	ggatgTTGACAGAAGATAGAGAGCACtgagaggacatgaagtgcatatatataatgcacctcgcttctttgtgctctttatacttctgtcattaccct	cca-MIR156c-p3	AGAGCACtgagaggacat	3'	New	gp2b	...(((((...(((..(((..........)))..))).)))))...	40	43.5	-12.4	0.6	0	0	0	0	0	5	0	0	0	0	0	4.73216	low
5	3	cca-MIR156c-p3_2ss7CT17AT	AGAGCATTGAGAGGACTT	18	contig_700756	-	1428	1497	gttgtgttcagaacgtcgtgagacaattcggtccatatccggtgtgggcattAGAGCATTGAGAGGACTT	1	cca-MIR156c,	cca-MIR156c	ggatgTTGACAGAAGATAGAGAGCACtgagaggacatgaagtgcatatatataatgcacctcgcttctttgtgctctttatacttctgtcattaccct	cca-MIR156c-p3	AGAGCACtgagaggacat	3'	New	gp2b	...((((((.(((.(((....)))..))).((((((((...))))))))....))))))...........	56	48.6	-20.9	0.6	0	0	0	0	0	5	0	0	0	0	0	4.73216	low
6	4	ppt-miR156a	TGACAGAAGAGAGTGAGCAC	20	contig_3206635	+	1254	1420	aaacgggttgaagacttacctggttatTGACAGAAAAGAGTGAGCACtacactgaaatgaatgaccttcaattccagtactctcgtaaaacacaggtgcataaaaatgagggtaaagagcaaagcgaagtatttttattctgtttcccgcctaagatttattccgaa	173	ppt-MIR156b,ppt-MIR156c,ppt-MIR156a,smo-MIR156a,mtr-MIR156i,mtr-MIR156c,mtr-MIR156d,mtr-MIR156b,gma-MIR156h,gma-MIR156v,gma-MIR156a,gma-MIR156x,gma-MIR156o,gma-MIR156q,gma-MIR156s,gma-MIR156u,gma-MIR156w,gma-MIR156y,gma-MIR156k,gma-MIR156n,ptc-MIR156a,ptc-MIR156f,ptc-MIR156b,ptc-MIR156d,ptc-MIR156c,ptc-MIR156e,ath-MIR156e,ath-MIR156a,ath-MIR156d,ath-MIR156f,ath-MIR156b,ath-MIR156c,bra-MIR156c,ath…	ppt-MIR156a	ggcggtggaggatgtgggagTGACAGAAGAGAGTGAGCACagctgagcatgtacatgaggaagtacttgcccatgtgtgctcactctcttcctgtcgcacctctcctttgacgct	ppt-miR156a	TGACAGAAGAGAGTGAGCAC	5'	Yes	gp2b	...(((..((((..((((...(((....((((((((((((((.((.....((((((.((((.....)))).)).))))((((((((...................))))))))..........))....))))))).)))))))....))))))).))))..)))..	162	38.3	-32.6	0.5	67	46	87	336	118	106	66.3169	39.7171	102.011	325.441	149.723	100.322	middle
7	5	ath-MIR156j-p5_2ss14CT18GT	AGAAGAGAGAGAGTACATTT	20	contig_3319152	+	1041	1072	AGAAGAGAGAGAGTACAGTTtttcatttcaca	9	ppt-MIR529f,ppt-MIR529e,ath-MIR156j,hpa-MIR156a,osa-MIR529a,osa-MIR529b,bdi-MIR529,sbi-MIR529,zma-MIR529,	ath-MIR156j	ttTGACAGAAGAGAGAGAGCACagtttgagtcgccaattcccttgtagctctctagtttagtgtccat	ath-MIR156j-p5	AGAAGAGAGAGAGCACagtt	5'	New	gp2b	....(((((((((......))))).))))...	25	34.4	-4.9	0.4	0	0	0	13	10.5	5	0	0	0	12.5915	13.3228	4.73216	middle
8	6	aly-MIR157c-p5_2ss11AT18AC	TGTATAACAATTTCAAGC	18	contig_180	-	374	430	TGTATAACAATTTCAAGTggtcggcgagaagaatccTTTGCAGACGACTTAAATAag	2	aly-MIR157c,bol-MIR9410,	aly-MIR157c	catactttatgatgttgcatatatcacacatacgtttgagagtgatgctggttgTTGACAGAAGATAGAGAGCACtaaggatgacatgcaagcacatacatatatcatcacaccccatgtggatgataaaatatgtataacaaattcaagaaagagagagagagagagatcagatgtagagggagagggagagaaagagactgcatctctactcttttgtGCTCTCTATACTTCTGTCACCacctttatttcttcttctctctcacctacatatacgcacagtcacatctatg	aly-MIR157c-p5	tgtataacaaattcaaga	5'	New	gp2b	.........((((.((((.(((.(((((........))))).))).))))))))...	45	38.6	-12.9	0.6	18	8	0	6	7	14	17.8165	6.90732	0	5.81144	8.88185	13.25	middle
8	7	bol-MIR9410-p3_2ss4TG17TA	TTTGCAGACGACTTAAATA	19	contig_180	-	374	430	TGTATAACAATTTCAAGTggtcggcgagaagaatccTTTGCAGACGACTTAAATAag	2	aly-MIR157c,bol-MIR9410,	bol-MIR9410	ctttccagacTACTTAATTATAAGTCGTCTGGaaagtctactaagtcgtccagctggaagacttttcagacgacttaattataagtcgtctgcgaagt	bol-MIR9410-p3	ttttcagacgacttaatta	3'	New	gp2b	.........((((.((((.(((.(((((........))))).))).))))))))...	45	38.6	-12.9	0.6	579	335.5	90.5	87.5	106.5	290	573.096	289.676	106.115	84.7502	135.131	274.465	middle
9	7	bol-MIR9410-p3_2ss4TG17TA	TTTGCAGACGACTTAAATA	19	contig_756956	-	2345	2384	agtggtcgtcaagaagaatcaTTTACAGACGACTTAAATA	1	bol-MIR9410,	bol-MIR9410	ctttccagacTACTTAATTATAAGTCGTCTGGaaagtctactaagtcgtccagctggaagacttttcagacgacttaattataagtcgtctgcgaagt	bol-MIR9410-p3	ttttcagacgacttaatta	3'	New	gp2b	...(((((((..(((......)))...)))))))......	31	35	-8.6	0.6	579	335.5	90.5	87.5	106.5	290	573.096	289.676	106.115	84.7502	135.131	274.465	middle
10	8	aly-MIR157c-p5_2ss11AT18AT	TGTATAACAATTTCAAGT	18	contig_1092671	+	141	197	TGTATAACAATTTCAAGTattcgaaaagaaaaatcctttgtagatgacttaaataaa	1	aly-MIR157c,	aly-MIR157c	catactttatgatgttgcatatatcacacatacgtttgagagtgatgctggttgTTGACAGAAGATAGAGAGCACtaaggatgacatgcaagcacatacatatatcatcacaccccatgtggatgataaaatatgtataacaaattcaagaaagagagagagagagagatcagatgtagagggagagggagagaaagagactgcatctctactcttttgtGCTCTCTATACTTCTGTCACCacctttatttcttcttctctctcacctacatatacgcacagtcacatctatg	aly-MIR157c-p5	tgtataacaaattcaaga	5'	New	gp2b	.........((((.((((..((..((((.......))))...))..))))))))...	45	22.8	-4.8	0.4	11.5	0	0	0	3.5	12	11.3827	0	0	0	4.44093	11.3572	middle
11	9	aly-MIR157c-p3_2ss11AT18AT	TGTATAACAATTTCAAGT	18	contig_180564	+	1353	1379	aaagctTGTATAACAATTTCAAGTggn	1	aly-MIR157c,	aly-MIR157c	catactttatgatgttgcatatatcacacatacgtttgagagtgatgctggttgTTGACAGAAGATAGAGAGCACtaaggatgacatgcaagcacatacatatatcatcacaccccatgtggatgataaaatatgtataacaaattcaagaaagagagagagagagagatcagatgtagagggagagggagagaaagagactgcatctctactcttttgtGCTCTCTATACTTCTGTCACCacctttatttcttcttctctctcacctacatatacgcacagtcacatctatg	aly-MIR157c-p3	tgtataacaaattcaaga	3'	New	gp2b	...(((((...........)))))...	21	29.6	-2.7	0.3	11.5	0	0	0	3.5	12	11.3827	0	0	0	4.44093	11.3572	middle
12	10	pde-MIR159-p5	TTTGGTTTGAAGGGAGCT	18	contig_3131484	-	345	371	cttaTTTGGTTTGAAGGGAGCTCGACt	15	pde-MIR159,ath-MIR159c,aly-MIR159c,ppe-MIR159,vvi-MIR159c,mes-MIR159b,mes-MIR159a,atr-MIR159,cme-MIR159a,cpa-MIR159a,rco-MIR159,hbr-MIR159b,hbr-MIR159a,ahy-MIR159,zma-MIR159e,	pde-MIR159	taagcggtagagctccttttgtaccaatcaaggactgtgcaaaaatgatccgactgccgatttatgcatccttctgccctgcgagtgttcgttgtttcaagtccgaatagattgcaggttagtggtttgcagaagaccgatttcattgcaggttagtggtgtgcataaggcgggagttgtattgattttgtgttgtcctcgTTTGGTTTGAAGGGAGCTCTActgggc	pde-MIR159-p5	TTTGGTTTGAAGGGAGCT	5'	New	gp2b	.....(((((((.....)))).)))..	20	44.4	-1.5	0.1	18.5	36	34.5	33	51	46	18.3114	31.0829	40.4526	31.9629	64.7106	43.5359	middle
12	11	pde-miR159_L-1R+1	TTGGTTTGAAGGGAGCTCTAC	21	contig_3131484	-	345	371	cttaTTTGGTTTGAAGGGAGCTCGACt	15	pde-MIR159,ath-MIR159c,aly-MIR159c,ppe-MIR159,vvi-MIR159c,mes-MIR159b,mes-MIR159a,atr-MIR159,cme-MIR159a,cpa-MIR159a,rco-MIR159,hbr-MIR159b,hbr-MIR159a,ahy-MIR159,zma-MIR159e,	pde-MIR159	taagcggtagagctccttttgtaccaatcaaggactgtgcaaaaatgatccgactgccgatttatgcatccttctgccctgcgagtgttcgttgtttcaagtccgaatagattgcaggttagtggtttgcagaagaccgatttcattgcaggttagtggtgtgcataaggcgggagttgtattgattttgtgttgtcctcgTTTGGTTTGAAGGGAGCTCTActgggc	pde-miR159	TTTGGTTTGAAGGGAGCTCTA	3'	Diff	gp2b	.....(((((((.....)))).)))..	20	44.4	-1.5	0.1	5419	2730.5	1601.5	1706	1425.5	1802	5363.75	2357.55	1877.82	1652.39	1808.73	1705.47	high
13	12	pta-miR159c_R-1	CTTGGATTGAAGGGAGCTCC	20	contig_1424679	-	1769	1863	ttcCTTGGATTGAAGGGAGCTCCactaaatttgattttaataacaccttattcatcatatacaagtaaacctaacattttactcatcaatctttt	108	pta-MIR159c,pta-MIR159a,pta-MIR159b,ppt-MIR319e,ppt-MIR319a,ppt-MIR319c,ppt-MIR319b,ppt-MIR319d,smo-MIR159,smo-MIR319,mtr-MIR159a,mtr-MIR319b,mtr-MIR319a,mtr-MIR319d,gma-MIR319q,gma-MIR159e,gma-MIR319j,gma-MIR319g,gma-MIR319h,gma-MIR319e,gma-MIR159a,gma-MIR319b,gma-MIR319m,gma-MIR319k,gma-MIR319a,ptc-MIR159d,ptc-MIR319a,ptc-MIR159b,ptc-MIR319d,ptc-MIR319c,ptc-MIR159a,ptc-MIR319f,ptc-MIR319g,ath-M…	pta-MIR159c	gatgtgtgaatgatgcgggagctgattttgtccaggaaatgtcttttcCTTGGATTGAAGGGAGCTCCCttatgtagcatacatt	pta-miR159c	CTTGGATTGAAGGGAGCTCCC	5'	Diff	gp2b	......(((((((.(((...)))........((((...(((((....))))).))))......((((((........))))))..)))))))...	86	29.5	-11.6	0.4	26.5	35.5	92	2611.5	5715.5	5265.5	26.2298	30.6512	107.874	2529.43	7252.03	4983.44	high
14	13	pde-miR159	TTTGGTTTGAAGGGAGCTCTA	21	contig_1435774	-	1470	1606	attgtgtactgcccttgTTTGGTTTGAAGGGAGCTCTAcaatattcctattgctttcaattattacatgttcaccacattttaaggctccatcttatttgacatttggaaaccctagcaagttaaattgttcgccaa	55	pde-MIR159,mtr-MIR159a,gma-MIR159e,gma-MIR159a,ptc-MIR159b,ptc-MIR159a,ath-MIR159a,ath-MIR159b,ath-MIR159c,aly-MIR159a,aly-MIR159b,aly-MIR159c,ppe-MIR159,vvi-MIR159c,nta-MIR159,mes-MIR159b,mes-MIR159a,atr-MIR159,lus-MIR159c,lus-MIR159b,cme-MIR159a,bra-MIR159a,bna-MIR159,cpa-MIR159a,sly-MIR159,rco-MIR159,csi-MIR159,aqc-MIR159,hbr-MIR159b,hbr-MIR159a,ahy-MIR159,htu-MIR159a,pvu-MIR159a,osa-MIR159f,o…	pde-MIR159	taagcggtagagctccttttgtaccaatcaaggactgtgcaaaaatgatccgactgccgatttatgcatccttctgccctgcgagtgttcgttgtttcaagtccgaatagattgcaggttagtggtttgcagaagaccgatttcattgcaggttagtggtgtgcataaggcgggagttgtattgattttgtgttgtcctcgTTTGGTTTGAAGGGAGCTCTActgggc	pde-miR159	TTTGGTTTGAAGGGAGCTCTA	5'	Yes	gp2b	...(((.((....((((((.(((((....((((((...(((((....)))))..............((((.....)))).....)))))).((......)).......)))))..)))))).......)).)))...	131	36.5	-22.7	0.5	14155	7606	3742	6815	6495	8079	14010.7	6567.13	4387.64	6600.83	8241.09	7646.22	high
15	13	pde-miR159	TTTGGTTTGAAGGGAGCTCTA	21	contig_503147	-	742	838	actgtgttgatggatcccttaggatttgaatgattggtttgttttttagaagaataggaagagtcaTTTGGTTTGAAGGGAGCACTAttattgcgta	4	pde-MIR159,atr-MIR159,ahy-MIR159,bdi-MIR159c,	pde-MIR159	taagcggtagagctccttttgtaccaatcaaggactgtgcaaaaatgatccgactgccgatttatgcatccttctgccctgcgagtgttcgttgtttcaagtccgaatagattgcaggttagtggtttgcagaagaccgatttcattgcaggttagtggtgtgcataaggcgggagttgtattgattttgtgttgtcctcgTTTGGTTTGAAGGGAGCTCTActgggc	pde-miR159	TTTGGTTTGAAGGGAGCTCTA	3'	Yes	gp2b	..(((..((((((.((((((..((.(..(((((((..(((((((((...)))))))).)..)))))))..)))..))))))...))))))..)))..	93	36.1	-24.1	0.7	14155	7606	3742	6815	6495	8079	14010.7	6567.13	4387.64	6600.83	8241.09	7646.22	high
16	14	mtr-miR159a	TTTGGATTGAAGGGAGCTCTA	21	contig_1606843	-	910	1068	tttgaccttgatatgtttgattaaactgtTTTGGATTGAAGAGAGCTCTAgaaaattttgggcaatgtaatggctacagaacgtgatattgaaacttttcttaaggatgtttaactttgaccgagattctagacaaaatcatacattataaaggttgca	47	mtr-MIR159a,gma-MIR159e,gma-MIR159a,ptc-MIR159a,ptc-MIR159b,ath-MIR159a,ath-MIR159b,aly-MIR159a,aly-MIR159b,ppe-MIR159,vvi-MIR159c,nta-MIR159,mes-MIR159b,mes-MIR159a,atr-MIR159,lus-MIR159c,lus-MIR159b,cme-MIR159a,bra-MIR159a,bna-MIR159,cpa-MIR159a,sly-MIR159,rco-MIR159,csi-MIR159,hbr-MIR159b,hbr-MIR159a,ahy-MIR159,htu-MIR159a,pvu-MIR159a,osa-MIR159b,osa-MIR159a,bdi-MIR159b,sbi-MIR159a,zma-MIR159j…	mtr-MIR159a	ggggtggagcttcctttagtccaaatatggatcttgctatgttgatagagctgcttagctatgggtccctcaactctacccatcttgttctttgtggtagttttgtggcttccatatctagggagccttatcacctttagtttaatctttcTTTGGATTGAAGGGAGCTCTAcatcttgctct	mtr-miR159a	TTTGGATTGAAGGGAGCTCTA	5'	Yes	gp2b	...((((((...((((.(((((...(((((((((.(..(((.((((((((((((((((..(...((((..((....))..))))....)..))).))))))...))).))))..)))..))))))))...))....))))).))))....))))))...	153	32.1	-35.8	0.7	13.5	7.5	54.5	13	25	14.5	13.3624	6.47561	63.9034	12.5915	31.7209	13.7233	middle
17	15	mtr-miR159a_R-1	TTTGGATTGAAGGGAGCTCT	20	contig_1967399	-	356	392	ttgtttgattaaattatTTTGGATTGAAGAGAGCTCT	47	mtr-MIR159a,gma-MIR159e,gma-MIR159a,ptc-MIR159a,ptc-MIR159b,ath-MIR159a,ath-MIR159b,aly-MIR159b,aly-MIR159a,ppe-MIR159,vvi-MIR159c,nta-MIR159,mes-MIR159b,mes-MIR159a,atr-MIR159,lus-MIR159c,lus-MIR159b,cme-MIR159a,bra-MIR159a,bna-MIR159,cpa-MIR159a,sly-MIR159,rco-MIR159,csi-MIR159,hbr-MIR159b,hbr-MIR159a,ahy-MIR159,htu-MIR159a,pvu-MIR159a,osa-MIR159b,osa-MIR159a,bdi-MIR159b,sbi-MIR159a,zma-MIR159j…	mtr-MIR159a	ggggtggagcttcctttagtccaaatatggatcttgctatgttgatagagctgcttagctatgggtccctcaactctacccatcttgttctttgtggtagttttgtggcttccatatctagggagccttatcacctttagtttaatctttcTTTGGATTGAAGGGAGCTCTAcatcttgctct	mtr-miR159a	TTTGGATTGAAGGGAGCTCTA	3'	Diff	gp2b	..((((..((.((((......)))).))..))))...	32	27	-2.8	0.3	0	0	4.5	0	3	0	0	0	5.27642	0	3.80651	0	low
18	16	pde-miR159_1ss15AG	TTTGGTTTGAAGGGGGCTCTA	21	contig_2172439	+	3431	3544	agaggagttgtagagtagcTTTGGTTTGAAGGGGGCTCCAattgcatggtagctccagaagatgatacgctcacctgtgcagccaaacccatgatccttgttactaattccaat	25	pde-MIR159,mtr-MIR159a,gma-MIR159e,gma-MIR159a,ath-MIR159a,ath-MIR159b,aly-MIR159b,aly-MIR159a,lus-MIR159c,lus-MIR159b,bra-MIR159a,bna-MIR159,pvu-MIR159a,osa-MIR159b,osa-MIR159a,bdi-MIR159c,sbi-MIR159a,zma-MIR159f,zma-MIR159a,tae-MIR159b,ssp-MIR159a,sof-MIR159b,sof-MIR159d,sof-MIR159a,far-MIR159,	pde-MIR159	taagcggtagagctccttttgtaccaatcaaggactgtgcaaaaatgatccgactgccgatttatgcatccttctgccctgcgagtgttcgttgtttcaagtccgaatagattgcaggttagtggtttgcagaagaccgatttcattgcaggttagtggtgtgcataaggcgggagttgtattgattttgtgttgtcctcgTTTGGTTTGAAGGGAGCTCTActgggc	pde-miR159	TTTGGTTTGAAGGGAGCTCTA	5'	Diff	gp2b	...((((((((((...((..((((((((...(((((((((......))).))))))............(((((....)).)))))))))...))..))..)))).))))))...	108	46.5	-31	0.6	3.5	2.5	2.5	2.5	3.5	2.5	3.46431	2.15854	2.93135	2.42143	4.44093	2.36608	low
19	17	pde-miR159_1ss4GT	TTTTGTTTGAAGGGAGCTCTA	21	contig_3611255	-	215	300	gatggttgtgtTTTTGTTTGAAGTGAGCTCTAatgttttggattttgacagtatgtcatagattttaggagcgtttcaaaacctat	1	pde-MIR159,	pde-MIR159	taagcggtagagctccttttgtaccaatcaaggactgtgcaaaaatgatccgactgccgatttatgcatccttctgccctgcgagtgttcgttgtttcaagtccgaatagattgcaggttagtggtttgcagaagaccgatttcattgcaggttagtggtgtgcataaggcgggagttgtattgattttgtgttgtcctcgTTTGGTTTGAAGGGAGCTCTActgggc	pde-miR159	TTTGGTTTGAAGGGAGCTCTA	5'	Diff	gp2b	...((((.((....((((((((((....(((((....)))))...((((.....))))...)))))..)))))...)).))))...	80	33.7	-13.7	0.5	5	0	0	0	0	0	4.94902	0	0	0	0	0	low
20	18	pde-miR159_1ss21AC	TTTGGTTTGAAGGGAGCTCTC	21	contig_90513	-	1334	1389	aTTTGGTTTGAAGGGAGCGCTCttgttgcgtaactgaattttattttcttcgatag	4	pde-MIR159,lus-MIR159b,ahy-MIR159,bdi-MIR159c,	pde-MIR159	taagcggtagagctccttttgtaccaatcaaggactgtgcaaaaatgatccgactgccgatttatgcatccttctgccctgcgagtgttcgttgtttcaagtccgaatagattgcaggttagtggtttgcagaagaccgatttcattgcaggttagtggtgtgcataaggcgggagttgtattgattttgtgttgtcctcgTTTGGTTTGAAGGGAGCTCTActgggc	pde-miR159	TTTGGTTTGAAGGGAGCTCTA	5'	Diff	gp2b	.......((((((..(((((.......)))).............)..))))))...	46	37.5	-10.1	0.5	68.5	34	8	18	16	15	67.8016	29.3561	9.38031	17.4343	20.3014	14.1965	middle
21	19	lus-MIR160b-p3_2ss12CT17CG	AGCCATGCATGTCTAAGTA	19	contig_123331	-	563	625	cgatcgtgccagtagtcatatgcttgtctcaaatattaAGCCATGCATGTCTAAGCAtgaact	2	lus-MIR160b,cme-MIR160c,	lus-MIR160b	ggtggtgagttagtgtgtaatgtgtgtgcgTGCCTGGCTCCCTGTATGCCAtttgcaagagctcatcaacacagttttgatggggcttggtggatggcgtactgagtagccatgcatgcctaactatcattgctccaaatctaacttctccatt	lus-MIR160b-p3	agccatgcatgcctaacta	3'	New	gp2b	...((((((...(((..((((((.((.((.........)).)).))))))))).))))))...	57	41.3	-13.2	0.5	113	102.5	63.5	52	53.5	268	111.848	88.5	74.4562	50.3658	67.8827	253.644	middle
22	20	lus-MIR160b-p5_2ss12CT17CG	AGCCATGCATGTCTAAGTA	19	contig_180	-	6610	6743	AGCCATGCATGTCTAAGTAtgaactatttcagactgtgaaactgcggannnnnnnnnnnnnnnnnnntagtttctttgatggtacctttactactcggataaccgtagtaattctagagctaatacgtgcacaa	2	lus-MIR160b,cme-MIR160c,	lus-MIR160b	ggtggtgagttagtgtgtaatgtgtgtgcgTGCCTGGCTCCCTGTATGCCAtttgcaagagctcatcaacacagttttgatggggcttggtggatggcgtactgagtagccatgcatgcctaactatcattgctccaaatctaacttctccatt	lus-MIR160b-p5	agccatgcatgcctaacta	5'	New	gp2b	.....(((((((...(((....((((..(((((....(((((((.......................))))))))))))))))....(((((((..((....))))))))).......)))...)))))))...	126	33.6	-22.5	0.5	113	102.5	63.5	52	53.5	268	111.848	88.5	74.4562	50.3658	67.8827	253.644	middle
23	21	cln-MIR162-p5_1ss20GT	TGATAAACCTCTGCATCCAT	20	contig_3377135	-	165	304	TGATAAACCTCTTCATCCATcattctaacttcaaattgtgggttttgggaactcaactattctggcatacaaatgagataggcaagaaaatttcatagctattccattcaaaaaaatcttgggagatgatggaggaaggt	38	pde-MIR162,cln-MIR162,mtr-MIR162,gma-MIR162a,gma-MIR162c,gma-MIR162b,ptc-MIR162a,ptc-MIR162b,ath-MIR162a,ath-MIR162b,stu-MIR162a,stu-MIR162b,mdm-MIR162b,mdm-MIR162a,aly-MIR162a,aly-MIR162b,ppe-MIR162,vvi-MIR162,nta-MIR162a,nta-MIR162b,mes-MIR162,lus-MIR162a,lus-MIR162b,cme-MIR162,bra-MIR162,tcc-MIR162,cpa-MIR162a,ghr-MIR162a,sly-MIR162,rco-MIR162,csi-MIR162,vun-MIR162,htu-MIR162a,aau-MIR162,hpe-M…	cln-MIR162	ttaactggaggcagggttttatccatcccttcctgttactgatttaaggctctgctcacaattaactgcagttaacaggcacgggTTGATAAACCTCTGCATCCAGtttgg	cln-MIR162-p5	TGATAAACCTCTGCATCCAG	5'	New	gp2b	.........(((((.(((((((((((((..........(((((((...))))))).......(((.(((...(((((((..........)))))))...))).)))............))))..))))))))).))))).	130	35.7	-28.6	0.6	10	0	0	48	106	73	9.89804	0	0	46.4915	134.497	69.0895	middle
24	22	cln-MIR162-p3_1ss18CT	GGAGGCAGGGTTTTATCTA	19	contig_4298125	+	460	598	gagatggctttccaaatccctccctaatgccctttggattttgtgtggagactttaatatcttggaataccaagaagagaaggtcgaccatctgcctatgtggtggtgtgtgggagaatgGGAGGCTGGGTTTTATCTA	1	cln-MIR162,	cln-MIR162	ttaactggaggcagggttttatccatcccttcctgttactgatttaaggctctgctcacaattaactgcagttaacaggcacgggTTGATAAACCTCTGCATCCAGtttgg	cln-MIR162-p3	ggaggcagggttttatcca	3'	New	gp2b	.(((((....((((....((((((.....(((............((((.((((((....((((((....))))))....))))))..))))(..((.....))..).....))).....)))))).))))...))))).	137	46	-45.5	0.7	0	0	0	7	10	0	0	0	0	6.78001	12.6884	0	middle
25	23	zma-miR164c-3p_L-1_1ss9CA	ATGTGCCATTCTTCTCCATC	20	contig_1405987	-	176	223	tccggttcaattatctcccttttaggaaATGTGCCATCCTTCTCCATC	2	zma-MIR164h,zma-MIR164c,	zma-MIR164c	tggcgaggtgcgcgcggTGGAGAAGCAGGGCACGTGCAttctttccgtcgccggccggcttggcagcggccggcggcccggctctcgcagtcacgcgtacgtcgcctgagcggcgcgcgcgagagagagagacacggcaggtcgtcgccggcgcggctaactggtgcaggtgcagcagctagcttctgaaacccagccagccagccagccggccggccggccgatcgatgcgtgCATGTGCCCTTCTTCTCCATCgggcacgcctcgcct	zma-miR164c-3p	CATGTGCCCTTCTTCTCCATC	3'	Diff	gp2b	...(((...(((...(((......))))))..))).............	32	43.8	-4.7	0.2	0	0	0	13	17	7	0	0	0	12.5915	21.5702	6.62502	middle
26	24	cme-MIR166e-p5_2ss9CT19GC	TTCTTCTTTCTCTTATTTC	19	contig_339348	-	1472	1602	TTCTTCTTTCTCTTATTTTatatgaaaaattaattgagtaatcaattaattataaaacttaagtgattggtttaaaatatattacttcaagttactgtaagaattcaattacttggaaataggtggaaaac	1	cme-MIR166e,	cme-MIR166e	gtgtttggaatggagtttgctccgaaatcttttttttgtcaatccttttgaaaggagaagaaataaaactacatgtcaatgtcttttcctgtcattttttcttaagttttctttcttgctttcttctttatgatcttcaaaatttttattctatgttgtttttttccctgactaaaagtagtctttttcttcttcttcctcttatttgaaagtttgttcgtgttgaataaatggaaaaaatgatcTCGGACCAGGCTTCATTCCTCacacgtacct	cme-MIR166e-p5	ttcttcttcctcttatttg	5'	New	gp2b	......(((((((((((((........((((((((((....))))))))))........((((((((((..((....((((..((.....))...))))..))..)))))))))))))))))).)))))..	123	21.4	-26.2	0.9	0	0	0	5	0	0	0	0	0	4.84287	0	0	low
27	25	mtr-miR168b	TCGCTTGGTGCAGGTCGGGAA	21	contig_482873	-	2350	2450	ctcaaatTCGCTTGGTGCAGGTCGGGAAtgctctgtgttgttgcagaaagaaagctgtaatcaatgcaatgatattccccgcctacatcaattgaattgga	37	mtr-MIR168c,mtr-MIR168b,gma-MIR168b,gma-MIR168a,ptc-MIR168b,ptc-MIR168a,ath-MIR168a,ath-MIR168b,mdm-MIR168a,mdm-MIR168b,aly-MIR168a,aly-MIR168b,ppe-MIR168,vvi-MIR168,nta-MIR168d,nta-MIR168e,nta-MIR168a,nta-MIR168b,nta-MIR168c,mes-MIR168a,atr-MIR168,lus-MIR168a,lus-MIR168b,cme-MIR168,bra-MIR168a,bna-MIR168a,bra-MIR168b,bra-MIR168c,bna-MIR168b,tcc-MIR168,sly-MIR168a,sly-MIR168b,rco-MIR168,cca-MIR16…	mtr-MIR168b	aacctctgatTCGCTTGGTGCAGGTCGGGAAccattacatccacagtttccctcggtaaattggatcctgccttgcatcaatcgaatcggaggctgca	mtr-miR168b	TCGCTTGGTGCAGGTCGGGAA	5'	Yes	gp2b	.((.(((((..((((((.(((..(((((((.((((..(((((((((........)))))).)))..))..)))))))))..))).))))))..))))).))	100	43.6	-37.3	0.8	549	1313	936	3803	1632	1853	543.402	1133.66	1097.5	3683.48	2070.74	1753.74	high
28	26	bna-MIR169j-p5_2ss4TG17AT	CGTGGAAGGGTTTTGGTTT	19	contig_1461391	-	731	799	CGTGGAAGGGATTTGGTTTaggacattatgaacatggtatacatgatcttgtcattaaccaatcccgtg	2	bna-MIR169j,bna-MIR169l,	bna-MIR169j	gtgtttagTAGCCAAGGATGACTTGCCTGCtcttgttcacctccacgattcaactttatacgttgaagggttttggattattgtgcattcaacatgtataataatttgaaatcatgttgaatctttgtgggttaggtttcaggcagtctccttggctattttgacat	bna-MIR169j-p5	cgttgaagggttttggatt	5'	New	gp2b	.......((((.((((((...((((....((.((((.....)))).)).))))...))))))))))...	59	40.6	-22.6	0.8	0	0	0	0	3.5	3	0	0	0	0	4.44093	2.8393	low
29	27	bdi-miR169i_L-1_1ss22AG	CAGCCAAGAATGGCTTGCCTG	21	contig_169190	+	2167	2329	atatgggtgttgcgtgaagaggcagaggtagcgtagtgctCAGCCAAGAATGACTTGCCTGgatttctgcattgtcaaatgttatgacgaaattgacaaagtttgtttggggaaagtcattctcgactgcgcattggctctgtttttcatgctacacccaaca	1	bdi-MIR169i,	bdi-MIR169i	tggagacgaggagcccctttgcaggctctaCCAGCCAAGAATGGCTTGCCTAtgcccacgttctgtttcatcaccactgggcttaatcttggagccctggtgatggatgagatgtgattgtatggtcaagccatcttggctagaagagagatcctcgtcccccatgctaggctgc	bdi-miR169i	CCAGCCAAGAATGGCTTGCCTA	5'	Diff	gp2b	...(((((((.(((((((((.(((((....((.((((((.(((...((((((((((.((..(((....((.(((((((.(((....)))...))))))).))..)))..))..))))))))))...))).)))))))))))))))))))))).)))))))...	157	44.8	-68.9	0.9	0	0	0	3	7	5	0	0	0	2.90572	8.88185	4.73216	low
30	27	bdi-miR169i_L-1_1ss22AG	CAGCCAAGAATGGCTTGCCTG	21	contig_566084	+	329	468	atttcatctaaggcagagtgtgttagaCAGCCAAGAATGGCTTGCCTGtgtatttgtaaaattattgaaatgttttggtatgcaggcaaaccattcgcgactggccatcacactttgcttctcatggttttgggtgagga	1	bdi-MIR169i,	bdi-MIR169i	tggagacgaggagcccctttgcaggctctaCCAGCCAAGAATGGCTTGCCTAtgcccacgttctgtttcatcaccactgggcttaatcttggagccctggtgatggatgagatgtgattgtatggtcaagccatcttggctagaagagagatcctcgtcccccatgctaggctgc	bdi-miR169i	CCAGCCAAGAATGGCTTGCCTA	5'	Diff	gp2b	..((((((((((((((((((((.....(((....((((((.(((((((..(((...((((((.........)))))))))..))))))).))))))....))).....)))))))))))..........)))))))))..	136	42.1	-53	0.9	0	0	0	3	7	5	0	0	0	2.90572	8.88185	4.73216	low
31	28	bna-MIR169l-p3_2ss4TG17AT	CGTGGAAGGGTTTTGGTTT	19	contig_2691364	-	1857	1891	atacctccaccaatgaCGTGGAAGGGATTTGGTTT	2	bna-MIR169l,bna-MIR169j,	bna-MIR169l	catggcgaaaagagtcgtgtttagTAGCCAAGGATGACTTGCCTGCtcttgttcacctccacgattcaactttatacgttgaagggttttggattattgtgcattcaacatgtataataatttgaaatcatgttgaatctttgtgggttaggtttcaggcagtctccttggctattttgacatacttttttcatccatg	bna-MIR169l-p3	cgttgaagggttttggatt	3'	New	gp2b	...(((((((.......))))).))..........	22	45.7	-8.2	0.5	0	0	0	0	3.5	3	0	0	0	0	4.44093	2.8393	low
32	29	vvi-MIR171h-p5_2ss6TC20CT	AGATGCTGGTGCGGTTCAATC	21	contig_1407596	+	1849	1952	agtgaggaaaagAGATGCTGGTGCGGTTCAATCccatgacagtactactctgcagctgtagtgctttctgggaTTGAGCCGTGCCAATATCACTttacctttgt	66	pde-MIR171,smo-MIR171a,smo-MIR171b,mtr-MIR171f,mtr-MIR171e,gma-MIR171u,gma-MIR171f,gma-MIR171c,gma-MIR171q,gma-MIR171o,gma-MIR171k,gma-MIR171l,ptc-MIR171b,ptc-MIR171a,ptc-MIR171c,ptc-MIR171d,mdm-MIR171f,mdm-MIR171j,mdm-MIR171k,mdm-MIR171l,aly-MIR171c,ppe-MIR171a,ppe-MIR171b,vvi-MIR171d,vvi-MIR171j,vvi-MIR171c,vvi-MIR171e,vvi-MIR171f,vvi-MIR171h,nta-MIR171a,nta-MIR171b,mes-MIR171c,mes-MIR171b,mes-…	vvi-MIR171h	tttcacgagatgttggtgcggttcaacctaactgtagtgtccatgaatgtatcgactctgatgttTGGTTGAGCCGCGCCAATATCccgtctatct	vvi-MIR171h-p5	agatgttggtgcggttcaacc	5'	New	gp2b	...((((.((((.(((..(((..(((((((((((((.((.((((((((.........)))))))).)))))))))))))))..)))..))).)))).))))...	98	47.1	-56.2	1.1	0	0	9	0	0	0	0	0	10.5528	0	0	0	middle
32	30	smo-miR171a_1ss9TC	TTGAGCCGCGCCAATATCACT	21	contig_1407596	+	1849	1952	agtgaggaaaagAGATGCTGGTGCGGTTCAATCccatgacagtactactctgcagctgtagtgctttctgggaTTGAGCCGTGCCAATATCACTttacctttgt	66	pde-MIR171,smo-MIR171a,smo-MIR171b,mtr-MIR171f,mtr-MIR171e,gma-MIR171u,gma-MIR171f,gma-MIR171c,gma-MIR171q,gma-MIR171o,gma-MIR171k,gma-MIR171l,ptc-MIR171b,ptc-MIR171a,ptc-MIR171c,ptc-MIR171d,mdm-MIR171f,mdm-MIR171j,mdm-MIR171k,mdm-MIR171l,aly-MIR171c,ppe-MIR171a,ppe-MIR171b,vvi-MIR171d,vvi-MIR171j,vvi-MIR171c,vvi-MIR171e,vvi-MIR171f,vvi-MIR171h,nta-MIR171a,nta-MIR171b,mes-MIR171c,mes-MIR171b,mes-…	smo-MIR171a	cgagcgagagcgatattggctctgctcaatcgcatgacgctgctgcatcgcacgaaaaatttgcgatgggaatggatcgatggagtcgcagcagaggcatgagaTTGAGCCGTGCCAATATCACTggtgtttttc	smo-miR171a	TTGAGCCGTGCCAATATCACT	3'	Diff	gp2b	...((((.((((.(((..(((..(((((((((((((.((.((((((((.........)))))))).)))))))))))))))..)))..))).)))).))))...	98	47.1	-56.2	1.1	321	430	133	1948	2374	2831	317.727	371.268	155.948	1886.78	3012.22	2679.35	high
33	31	mtr-MIR171c-p5_2ss16GC18TG	TTTGATTTTGATTTTCAG	18	contig_1300764	+	767	793	atTTTGATTTTGATTTTCAGacaatgt	1	mtr-MIR171c,	mtr-MIR171c	attgagatattggcttggttcactcagaagaaacaaaaaataacactacttgtgaatgttttgattttgattttgatttTGATTGAGCCGTGCCAATATTtcaaa	mtr-MIR171c-p5	tttgattttgatttTGAT	5'	New	gp2b	..(((((.........)))))......	19	22.2	-1.3	0.2	134.5	27.5	0	19	59.5	239	133.129	23.7439	0	18.4029	75.4957	226.197	middle
34	32	mtr-MIR171c-p3_2ss1TA17GC	ATTTGATTTTGATTTTCA	18	contig_1514896	-	341	447	ttttgaacatgatgagaatcaatgatttcattatttacaacatttcaattttgattcacaaatttatatttatcatgATTTGATTTTGATTTTCAtcatgattattg	1	mtr-MIR171c,	mtr-MIR171c	attgagatattggcttggttcactcagaagaaacaaaaaataacactacttgtgaatgttttgattttgattttgatttTGATTGAGCCGTGCCAATATTtcaaa	mtr-MIR171c-p3	ttttgattttgatttTGA	3'	New	gp2b	...(((.(((((((((((((((.((..(((..(((...........)))..))).)).((((((............))))))...))))))))))))))).)))...	101	20.6	-21.9	1	180.5	53	10.5	78	100.5	482.5	178.66	45.761	12.3117	75.5487	127.518	456.653	middle
35	33	mtr-MIR171c-p3_2ss16GC18TG	TTTGATTTTGATTTTCAG	18	contig_1687195	+	586	695	tgaagattgcttttcattatgccttattgcaagttacaaatgaagtctatttctaaatagagTTTGATTTTGATTTTCAGcaaatgggcctttgatgttgtatgtctaga	2	mtr-MIR171c,mtr-MIR171c,	mtr-MIR171c	attgagatattggcttggttcactcagaagaaacaaaaaataacactacttgtgaatgttttgattttgattttgatttTGATTGAGCCGTGCCAATATTtcaaa	mtr-MIR171c-p3	tttgattttgatttTGAT	3'	New	gp2b	...(((((((....(((((.((((..((((((((((.(((((((.((((((....)))))).))).))))))))))...))))..))))...)))))..))).))))...	104	30.9	-23.3	0.7	134.5	27.5	0	19	59.5	239	133.129	23.7439	0	18.4029	75.4957	226.197	middle
36	34	mtr-MIR171c-p5_2ss1TA17GC	ATTTGATTTTGATTTTCA	18	contig_180	-	997	1093	ATTTGATTTTGATTTTCAgtacgaatacaaaccgtnnnnnnntggcctatcgatcctttagactttcggaatttgaagctagaggtgtcagaaaagt	1	mtr-MIR171c,	mtr-MIR171c	attgagatattggcttggttcactcagaagaaacaaaaaataacactacttgtgaatgttttgattttgattttgatttTGATTGAGCCGTGCCAATATTtcaaa	mtr-MIR171c-p5	ttttgattttgatttTGA	5'	New	gp2b	............(((((..............(((........)))......((((((((((.((((........))))))))))).))).)))))..	83	34	-14.9	0.5	180.5	53	10.5	78	100.5	482.5	178.66	45.761	12.3117	75.5487	127.518	456.653	middle
37	35	mtr-MIR171c-p5_2ss1TC17GC	CTTTGATTTTGATTTTCA	18	contig_1974722	-	694	818	aatatCTTTGATTTTGATTTTCAtttatcttaatgatggttacacacactttaacttatggtatcctctgggaaaatataattaaattcatgcaatagatttatgatttttctatcttaggttca	3	mtr-MIR171c,mtr-MIR171c,ath-MIR864,	mtr-MIR171c	attgagatattggcttggttcactcagaagaaacaaaaaataacactacttgtgaatgttttgattttgattttgatttTGATTGAGCCGTGCCAATATTtcaaa	mtr-MIR171c-p5	ttttgattttgatttTGA	5'	New	gp2b	...((((..(((...((...((((..((((..((((.(......)....(((((.(((((...(((....)))...)))))))))).)))).....))))..))))..))...)))..))))...	119	24.8	-17.3	0.6	31	7	0	12.5	13	54	30.6839	6.0439	0	12.1072	16.4949	51.1073	middle
38	36	csi-MIR172a-p5_2ss7CA18AG	CTGTAGAAGCGTCCTCAG	18	contig_180	-	3341	3489	CTGTAGAAGCGTCCTCAGcgacggactgggcccaagtcccctggaagggggcgccggagagggtgagagccccgtcgggcccggaccctgttgcaccacgaggcgctgtcggcGAGTCGGGTTGTTTGGGAatgcagccctaatcgggt	2	mtr-MIR2592ay,csi-MIR172a,	csi-MIR172a	gtcaccttaaaacagtcgttgctcgctgtaGCAGCGTCCTCAAGATTCACAtccagtctaaaggcaaaagcagcaatttttcttcatttttgcttgccttggtttttgtcagtgAGAATCTTGATGATGCTGCAacggcgattaatgactagctaccaacaa	csi-MIR172a-p5	ctgtaGCAGCGTCCTCAA	5'	New	gp2b	(((....((((.((((.(((((((.((((((((..((((((.....))))))....((..((((....))))..))))))))))...))))))).....))))))))..)))(((...(((((((........)))))))...)))...	112	67.8	-72.9	0.7	8	0	0	0	0	5	7.91843	0	0	0	0	4.73216	low
38	37	mtr-MIR2592ay-p3_2ss6AG17CG	GAGTCGGGTTGTTTGGGA	18	contig_180	-	3341	3489	CTGTAGAAGCGTCCTCAGcgacggactgggcccaagtcccctggaagggggcgccggagagggtgagagccccgtcgggcccggaccctgttgcaccacgaggcgctgtcggcGAGTCGGGTTGTTTGGGAatgcagccctaatcgggt	2	mtr-MIR2592ay,csi-MIR172a,	mtr-MIR2592ay	atcaaaagcttgattccgccagaagatcgtcattagttagggtaaggtgcattccaactgcaacaattgtcttacctctgaaatggggtaattcaaacttgccaaacggccaggactcaagcatttcgCTCGGCATTCATGTTTTTCCTTtgaaaagattaaattcttgttAGGCTGGTTTAGATGAAGGTAttaagtgtcaaggaatgaacctcatttcgttggcacttgaataccatcatctaaagcacacctaacaaaaatttattcttttcaaaggaaaacatgaatgccgggtgaaatgcttgagtcaggttgtttggcaagtttgaatttaccccattcaaaggtaagacaattgttgtagttggaatgcacattccaactgcaacaattatc…	mtr-MIR2592ay-p3	gagtcaggttgtttggca	3'	New	gp2b	(((....((((.((((.(((((((.((((((((..((((((.....))))))....((..((((....))))..))))))))))...))))))).....))))))))..)))(((...(((((((........)))))))...)))...	112	67.8	-72.9	0.7	45	38	95.5	4.5	6	70	44.5412	32.8098	111.977	4.35858	7.61301	66.2502	middle
39	37	mtr-MIR2592ay-p3_2ss6AG17CG	GAGTCGGGTTGTTTGGGA	18	contig_54300	-	936	1023	gagagggtgacatccccgttagtctcagaccctattgaaacatgaggaactgtcagtGAGTTGGGTTGTTTGGGAatgtagccctaat	1	mtr-MIR2592ay,	mtr-MIR2592ay	atcaaaagcttgattccgccagaagatcgtcattagttagggtaaggtgcattccaactgcaacaattgtcttacctctgaaatggggtaattcaaacttgccaaacggccaggactcaagcatttcgCTCGGCATTCATGTTTTTCCTTtgaaaagattaaattcttgttAGGCTGGTTTAGATGAAGGTAttaagtgtcaaggaatgaacctcatttcgttggcacttgaataccatcatctaaagcacacctaacaaaaatttattcttttcaaaggaaaacatgaatgccgggtgaaatgcttgagtcaggttgtttggcaagtttgaatttaccccattcaaaggtaagacaattgttgtagttggaatgcacattccaactgcaacaattatc…	mtr-MIR2592ay-p3	gagtcaggttgtttggca	3'	New	gp2b	...((((..((((.((((.....(((((....((((((..((........))))))))..))))).....)))).))))..))))...	82	47.7	-24.1	0.6	45	38	95.5	4.5	6	70	44.5412	32.8098	111.977	4.35858	7.61301	66.2502	middle
40	38	vvi-MIR172d-p5_2ss7GT17CT	TGGAAGTGCAGTGATGTA	18	contig_48	-	9687	9828	tgagtgctctccataaggtcaaggcgagacgagccttttatcaaacgataggtatcaagTGGAAGTGCAGTGATGTAcgcagctgaggcatactaacagaccgaaagannntaaccttgttttAGATGAAGAAATGAAAAAA	2	vvi-MIR172d,osa-MIR821a,	vvi-MIR172d	gttagctgatgcagcatcatcaagattcacacccaatggaagggcagtgatgcaatctctgccaaagattttgagaTGAGAATCTTGATGATGCTGCATtcgcagtgaa	vvi-MIR172d-p5	tggaagggcagtgatgca	5'	New	gp2b	.......(((..(((((((.(((((.......))))).............(((....((((...(((((....)))))...((....)).)))).....)))...........)))))))...)))................	14	40.8	-26.1	0.5	0	0	0	4.5	2.5	9	0	0	0	4.35858	3.17209	8.51789	low
40	39	osa-MIR821a-p3_1ss13AG	AGATGAAGAAATGAAAAAA	19	contig_48	-	9687	9828	tgagtgctctccataaggtcaaggcgagacgagccttttatcaaacgataggtatcaagTGGAAGTGCAGTGATGTAcgcagctgaggcatactaacagaccgaaagannntaaccttgttttAGATGAAGAAATGAAAAAA	2	vvi-MIR172d,osa-MIR821a,	osa-MIR821a	gatatcagctgaaaAAGTCATCAACAAAAAAGTTGAATaactcatcaagatctaaaacttttattttggtcatttcttcatacgacaaagtgatagtaacattgttcacagaattgacatatctcttatctggttttataaactataacacatatatgtaaaatttgtgaataatattactaacatttcgtcagatgaagaaataaaaaaataaaagttatagatcttgatgagttattcaactttgttgttgatgactttttcaattgaaatc	osa-MIR821a-p3	agatgaagaaataaaaaaa	3'	New	gp2b	.......(((..(((((((.(((((.......))))).............(((....((((...(((((....)))))...((....)).)))).....)))...........)))))))...)))................	14	40.8	-26.1	0.5	0	0	0	0	0	9	0	0	0	0	0	8.51789	low
41	38	vvi-MIR172d-p5_2ss7GT17CT	TGGAAGTGCAGTGATGTA	18	contig_1204659	-	1424	1482	aaatgataggtatcaagTGGAAGTGCAGTGATGTAcgtagctgaggcatcctaacagac	1	vvi-MIR172d,	vvi-MIR172d	gttagctgatgcagcatcatcaagattcacacccaatggaagggcagtgatgcaatctctgccaaagattttgagaTGAGAATCTTGATGATGCTGCATtcgcagtgaa	vvi-MIR172d-p5	tggaagggcagtgatgca	5'	New	gp2b	...((.((((..((.(((....(((((....)))))...))))).....)))).))...	53	44.1	-14.3	0.5	0	0	0	4.5	2.5	9	0	0	0	4.35858	3.17209	8.51789	low
42	40	nta-MIR172e-p3_2ss14CG18TA	TTGGAACGATACAGAGAA	18	contig_1084136	+	594	656	atttacatggacatctgataaaaTTGGAACGATACAGAGAAgattagcatggcccctgtgcaa	2	nta-MIR172e,nta-MIR172f,	nta-MIR172e	gtttgcagatgtagcatcatcaagattcacataaaaaacgcatggtgatgagctgatgaaatgacattaatggccaaggcagctttctgaaggtgAGAATCTTGATGATGCTGCATcagcaataaacgactacctgatttatcattatgccattggaacgatacacagataattagcataattcatgtgcaagaatgccacgggtacatggtatggttcaattgatacagtcgttgtttgcgggtgtagcatcatcaagattcacatgaaaaggcaaggtgaaatgaaattaattaagagccatggctttttgaaggtgAGAATCTTGATGATGCTGCATcagcaataa	nta-MIR172e-p3	ttggaacgatacacagat	3'	New	gp2b	...((((.((.((((((((....(((........))).....))))).)))..)).))))...	57	39.7	-10.7	0.4	3.5	10	2.5	6	12	26	3.46431	8.63414	2.93135	5.81144	15.226	24.6072	middle
43	41	gma-MIR172b-p3_1ss4TG	TGAGGTGAGAATCTTGATGA	20	contig_1586919	-	752	853	tccaatgcttcatagttttcttctttacccaatttttccattctagtatacactactaccacttctcttccttgTGAGGTGAGAATCATGATGAacattatc	11	gma-MIR172b,stu-MIR172c,vvi-MIR172d,nta-MIR172i,lja-MIR172b,vun-MIR172,sbi-MIR172a,sbi-MIR172c,zma-MIR172b,zma-MIR172c,zma-MIR172d,	gma-MIR172b	ttgacagtcgttgtttgcggatGTAGCATCATCAAGATTCACatgcaaatgaaggtgggtgggactatgatgcaatccaagtgctctgccaatccatcggtctttttgatgtgAGAATCTTGATGATGCTGCATcagccataaacggctttaa	gma-MIR172b-p3	tgatgtgAGAATCTTGATGA	3'	New	gp2b	...((((.(((((....(((((((((((...............(((((.....)))))...............)))))).))))).....)))))))))...	96	35.3	-15.6	0.4	15	4.5	6	0	0	0	14.8471	3.88537	7.03523	0	0	0	middle
44	42	gma-MIR172b-p5_1ss4TG	TGAGGTGAGAATCTTGATGAT	21	contig_1764326	-	2069	2110	TGAGGTGAGAATCTTGATTATgctgcaaaaataattcaatca	11	gma-MIR172b,stu-MIR172c,vvi-MIR172d,nta-MIR172i,lja-MIR172b,vun-MIR172,sbi-MIR172c,sbi-MIR172a,zma-MIR172c,zma-MIR172b,zma-MIR172d,	gma-MIR172b	ttgacagtcgttgtttgcggatGTAGCATCATCAAGATTCACatgcaaatgaaggtgggtgggactatgatgcaatccaagtgctctgccaatccatcggtctttttgatgtgAGAATCTTGATGATGCTGCATcagccataaacggctttaa	gma-MIR172b-p5	tgatgtgAGAATCTTGATGAT	5'	New	gp2b	.(((((....)))))...........................	14	31	-2.4	0.2	38	13.5	29	11	6	13	37.6125	11.6561	34.0036	10.6543	7.61301	12.3036	middle
45	43	gma-MIR172b-p3_1ss5TG	TTGAGGTGAGAATCTTGATGA	21	contig_266527	-	1	142	aggattgagaatgctctgttctaaaacataatggtgagagttagattgatttattgaagtaataagatattctataccttcttgctatttcatccatgaaggaagaggatatgaaaacttTTGAGGTGAGATTCTTGATGAg	6	gma-MIR172b,stu-MIR172c,vvi-MIR172d,nta-MIR172i,lja-MIR172b,vun-MIR172,	gma-MIR172b	ttgacagtcgttgtttgcggatGTAGCATCATCAAGATTCACatgcaaatgaaggtgggtgggactatgatgcaatccaagtgctctgccaatccatcggtctttttgatgtgAGAATCTTGATGATGCTGCATcagccataaacggctttaa	gma-MIR172b-p3	ttgatgtgAGAATCTTGATGA	3'	New	gp2b	...((..(((((.(((..(((........(((((..(((((((((....(((((((...)))))))....)))).))..)))..)))))((.(((.....))).))................)))..))))))))..))...	136	32.4	-27.2	0.6	1379	1122	690	173	174	185	1364.94	968.751	809.052	167.563	220.777	175.09	middle
46	44	nta-MIR172e-p5_2ss15CG19TA	ATTGGAACGATACAGAGAA	19	contig_439164	+	2578	2668	ATTGGAACGATACAGAGAAacttagcattgctcatacataccaatgaaaaacgtaacttgtaagaaagtttgctaactctgtatgcgtgta	2	nta-MIR172e,nta-MIR172f,	nta-MIR172e	gtttgcagatgtagcatcatcaagattcacataaaaaacgcatggtgatgagctgatgaaatgacattaatggccaaggcagctttctgaaggtgAGAATCTTGATGATGCTGCATcagcaataaacgactacctgatttatcattatgccattggaacgatacacagataattagcataattcatgtgcaagaatgccacgggtacatggtatggttcaattgatacagtcgttgtttgcgggtgtagcatcatcaagattcacatgaaaaggcaaggtgaaatgaaattaattaagagccatggctttttgaaggtgAGAATCTTGATGATGCTGCATcagcaataa	nta-MIR172e-p5	attggaacgatacacagat	5'	New	gp2b	......(((((((((((....((((((....((((........)))).......(((((......))))))))))))))))))).)))...	82	35.2	-21.1	0.7	23	22.5	2.5	18	26	65.5	22.7655	19.4268	2.93135	17.4343	32.9897	61.9913	middle
47	45	nta-MIR172e-p3_2ss15CG19TA	ATTGGAACGATACAGAGAA	19	contig_644046	+	171	277	ttatgatgtagtgtatcatgctctatctaatgtctctttagagaaatctgataaaATTGGAACGATACAGAGAAtattggcatggcccatgtgcaaagatatcaaaa	2	nta-MIR172e,nta-MIR172f,	nta-MIR172e	gtttgcagatgtagcatcatcaagattcacataaaaaacgcatggtgatgagctgatgaaatgacattaatggccaaggcagctttctgaaggtgAGAATCTTGATGATGCTGCATcagcaataaacgactacctgatttatcattatgccattggaacgatacacagataattagcataattcatgtgcaagaatgccacgggtacatggtatggttcaattgatacagtcgttgtttgcgggtgtagcatcatcaagattcacatgaaaaggcaaggtgaaatgaaattaattaagagccatggctttttgaaggtgAGAATCTTGATGATGCTGCATcagcaataa	nta-MIR172e-p3	attggaacgatacacagat	3'	New	gp2b	...((((((..((((.((((..((((((((((((((((((((....)))))....((((...))))..)))).))))))).))))..))))))))...))))))...	101	33.6	-28.8	0.8	23	22.5	2.5	18	26	65.5	22.7655	19.4268	2.93135	17.4343	32.9897	61.9913	middle
48	46	atr-MIR319b-p5_2ss15TC17GA	AAGCAGCCATCCTTCGAA	18	contig_13087	-	1953	2038	ccaggaggtgggcttggAAGCAGCCATCCTTCGAAgaaagcgtaatagctcactggtctagctccataGCACCGAAAATGTATCGG	2	gra-MIR8751b,atr-MIR319b,	atr-MIR319b	gaaaattgcagaaatgggggctcctttgaggacaaagaaagcatttcggatcatcttttctctcagtgaagcagccatccTTTGGACTGAAGGGAGCTCCTaattcttctcttttc	atr-MIR319b-p5	aagcagccatccTTTGGA	5'	New	gp2b	...((((.((((((..((((........))))......(((......)))....)))))).))))......((((.......))))	16	52.3	-22.8	0.5	0	15	0	0	0	0	0	12.9512	0	0	0	0	middle
48	47	gra-MIR8751b-p3_2ss14TA18AG	GCACCGAAAATGTATCGG	18	contig_13087	-	1953	2038	ccaggaggtgggcttggAAGCAGCCATCCTTCGAAgaaagcgtaatagctcactggtctagctccataGCACCGAAAATGTATCGG	2	gra-MIR8751b,atr-MIR319b,	gra-MIR8751b	aaatggaggtTGAAATTTGTAGAGAGATAACGCTccaagcaggatccactgtcagcaagagtactaaaagcacgtccaactggaagagcatccaactaacatggcaccgaaaatgtttcgagttgaacttgctttcagtactcttgctgacagtgcgtcctacttggaatgttatctctctacaaatttcaacctcccact	gra-MIR8751b-p3	gcaccgaaaatgtttcga	3'	New	gp2b	...((((.((((((..((((........))))......(((......)))....)))))).))))......((((.......))))	16	52.3	-22.8	0.5	0	0	0	0	0	7	0	0	0	0	0	6.62502	low
49	48	ptc-MIR319d-p5_2ss8GC20CT	AGCTGCCCACTCATTCATTTA	21	contig_558795	-	1113	1244	AGCTGCCCACTCATTCATTTAccatctctctttattcagcgtttcggatgagtgggttgatatgtgaatgaagggggagatgatatcattctgtgaccattgccctttcTTGGACTGAAGGGAGCTCCGTct	128	pta-MIR159a,pta-MIR319,pta-MIR159c,pta-MIR159b,ppt-MIR319e,ppt-MIR319a,ppt-MIR319c,ppt-MIR319b,ppt-MIR319d,smo-MIR319,smo-MIR159,mtr-MIR319b,mtr-MIR319a,mtr-MIR319d,mtr-MIR319c,gma-MIR319p,gma-MIR319q,gma-MIR319j,gma-MIR319g,gma-MIR319h,gma-MIR319e,gma-MIR319b,gma-MIR319m,gma-MIR319l,gma-MIR319k,gma-MIR319a,gma-MIR156aa,gma-MIR159c,gma-MIR319c,gma-MIR319n,gma-MIR319o,gma-MIR319i,ptc-MIR159d,ptc-M…	ptc-MIR319d	aatggtttaacagagcttccttcagtccactcatggacgggcgaagggtttggattagctgccgactcattcattcaaacacagtagacaaggagtggcagcggctgctattgtgaatgtgtgaatgacgcgggagattaatttcatccttttcttctctgtgcTTGGACTGAAGGGAGCTCCCtttaattgt	ptc-MIR319d-p5	agctgccgactcattcattca	5'	New	gp2b	..((.(((..((((((((....((.(((.(((.((((........))))))).))).))....))))))))..))).))...............(((....((((((((.......)))))).))...))).	77	46.2	-37.7	0.6	0	0	0	30	15	20	0	0	0	29.0572	19.0325	18.9286	middle
49	49	pta-miR319_R+2	TTGGACTGAAGGGAGCTCCGT	21	contig_558795	-	1113	1244	AGCTGCCCACTCATTCATTTAccatctctctttattcagcgtttcggatgagtgggttgatatgtgaatgaagggggagatgatatcattctgtgaccattgccctttcTTGGACTGAAGGGAGCTCCGTct	128	pta-MIR159a,pta-MIR319,pta-MIR159c,pta-MIR159b,ppt-MIR319e,ppt-MIR319a,ppt-MIR319c,ppt-MIR319b,ppt-MIR319d,smo-MIR319,smo-MIR159,mtr-MIR319b,mtr-MIR319a,mtr-MIR319d,mtr-MIR319c,gma-MIR319p,gma-MIR319q,gma-MIR319j,gma-MIR319g,gma-MIR319h,gma-MIR319e,gma-MIR319b,gma-MIR319m,gma-MIR319l,gma-MIR319k,gma-MIR319a,gma-MIR156aa,gma-MIR159c,gma-MIR319c,gma-MIR319n,gma-MIR319o,gma-MIR319i,ptc-MIR159d,ptc-M…	pta-MIR319	gataagtggagctcccttcaatccaagaaatgcgtgtttagtgacagtacatctcctgcgtcatgcacaccactatcctgtcatgcaggtcgattgattgatttgttcaggctgctggagagtcacggacagggaagtagaatgcatgaatcagcagctgaaccaccgctgcacaagctttggTTGGACTGAAGGGAGCTCCaaca	pta-miR319	TTGGACTGAAGGGAGCTCC	3'	Diff	gp2b	..((.(((..((((((((....((.(((.(((.((((........))))))).))).))....))))))))..))).))...............(((....((((((((.......)))))).))...))).	77	46.2	-37.7	0.6	0	7	0	8485.5	9844.5	10091	0	6.0439	0	8218.83	12491.1	9550.45	high
50	50	ath-MIR390b-p3_2ss10AG20GA	TACATGTATGTCTGTTGGCAC	21	contig_1441689	+	1339	1424	aattacatgtgtggatttaatcaatcttagtagcaaaaaaaaggtttggttgaataccttacaatTACATGTATGTCTGTTGGCAC	1	ath-MIR390b,	ath-MIR390b	gagaaatagctataAAGCTCAGGAGGGATAGCGCCatggctcaccagtgctgtatgttttgtatatgcgtacatgtatatctgttggCGCTATCCATCCTGAGTTCCatagcttcttctt	ath-MIR390b-p3	tacatgtatatctgttggCGC	3'	New	gp2b	...((((((((.((((((((((((((((............)))).)))))))))).)).......)))))))).(((....)))..	70	31.4	-17.3	0.6	0	0	0	4	5.5	7.5	0	0	0	3.87429	6.9786	7.09824	low
51	50	ath-MIR390b-p3_2ss10AG20GA	TACATGTATGTCTGTTGGCAC	21	contig_832403	-	1136	1209	acagaaatgtgttaacaaaagaggtttggtcgaataccttgcaatTACATGCATGTCTGTTGGCACgcttcaat	1	ath-MIR390b,	ath-MIR390b	gagaaatagctataAAGCTCAGGAGGGATAGCGCCatggctcaccagtgctgtatgttttgtatatgcgtacatgtatatctgttggCGCTATCCATCCTGAGTTCCatagcttcttctt	ath-MIR390b-p3	tacatgtatatctgttggCGC	3'	New	gp2b	...(((..(((..((((...(((((..........)))))(((......))).....))))..)))..)))...	68	39.2	-17.4	0.6	0	0	0	4	5.5	7.5	0	0	0	3.87429	6.9786	7.09824	low
52	51	bna-MIR393-p5_2ss13AT18AT	GAAAGATAGAAATAAAAT	18	contig_252	-	10975	11100	cccgaaactttagaagaatcttttccattttttggttatgtctgGAAAGATAGAAATAAAATgactacaattttaggtattcacttaattttgctaggTGTTGGTGCTTTTCTTCTagtcttcaag	2	nta-MIR398,bna-MIR393,	bna-MIR393	TCCAAAGGGATCGCATTGATCctaatcaagctgagttattcccgaataattattttaattttttctcaatggaaagatagaaaaaaaaaattttgcttcgttttccggatcatgcgatctcttcgga	bna-MIR393-p5	gaaagatagaaaaaaaaa	5'	New	gp2b	...(((...(((((((((......(((..(((((....(((((....)))))....)))))...((((((..((((((....))))))..))).)))....))).....)))))))))..)))...	32	31.7	-27.7	0.7	0	0	0	0	0	5	0	0	0	0	0	4.73216	low
52	52	nta-MIR398-p3_2ss8AG17TC	TGTTGGTGCTTTTCTTCT	18	contig_252	-	10975	11100	cccgaaactttagaagaatcttttccattttttggttatgtctgGAAAGATAGAAATAAAATgactacaattttaggtattcacttaattttgctaggTGTTGGTGCTTTTCTTCTagtcttcaag	2	nta-MIR398,bna-MIR393,	nta-MIR398	tgtcaacaggggcaatctgagatcacatgttggtacttttcttttttctctgtaaatgacaagtgtggtttcaatatctcaataTGTGTTCTCAGGTCGCCCCTGtagagcta	nta-MIR398-p3	tgttggtacttttctttt	3'	New	gp2b	...(((...(((((((((......(((..(((((....(((((....)))))....)))))...((((((..((((((....))))))..))).)))....))).....)))))))))..)))...	32	31.7	-27.7	0.7	0	0	0	0	5	10	0	0	0	0	6.34418	9.46432	low
53	53	gma-miR394a-5p_L-1	TGGCATTCTGTCCACCTCC	19	contig_3424206	+	524	544	ttTGGCATTCTGTCTACCTCC	50	gma-MIR394e,gma-MIR394d,gma-MIR394g,gma-MIR394f,gma-MIR394b,gma-MIR394a,gma-MIR394c,ptc-MIR394a,ptc-MIR394b,ath-MIR394b,ath-MIR394a,stu-MIR384,mdm-MIR394b,mdm-MIR394a,aly-MIR394b,aly-MIR394a,ppe-MIR394a,ppe-MIR394b,vvi-MIR394b,vvi-MIR394a,vvi-MIR394c,nta-MIR394,mes-MIR394c,mes-MIR394a,mes-MIR394b,atr-MIR394,lus-MIR394a,lus-MIR394b,cme-MIR394a,cme-MIR394b,bna-MIR394b,bna-MIR394a,tcc-MIR394b,tcc-MI…	gma-MIR394c	cagagtttcTTGGCATTCTGTCCACCTCCacttccactttcagttccatggatctctctctctttttggccctatctacgtactcggaggtggacatactgccaatagag	gma-miR394a-5p	TTGGCATTCTGTCCACCTCC	3'	Diff	gp2b	...(((.....))).......	11	47.6	-1.4	0.1	8	0	6	92	112	79	7.91843	0	7.03523	89.1088	142.11	74.7681	middle
54	54	aly-MIR396b-p5	ATTTTTCCACAGCTTTCT	18	contig_1395450	-	152	216	acaatagactgagtgATTTTTCCACAGCTTTCTtaagaaaaagtggatatgtccatttctatgag	6	aly-MIR396b,nta-MIR396a,atr-MIR396b,bra-MIR396,csi-MIR396b,dpr-MIR396,	aly-MIR396b	gaagaagaagaagaagatcctggtcatatttTTCCACAGCTTTCTTGAACTTtctttttcatttccattgtttttttttttctaaaccaaaaaaaaagatctctaaaatttagcattttggaaacaaagaagaaGCTCAAGAAAGCTGTGGGAAAacatgacaattcagggttttactccattgattc	aly-MIR396b-p5	atttTTCCACAGCTTTCT	5'	New	gp2b	...(((((...((((((...(((((...((((....))))..)))))...))).))))))))...	59	33.8	-12.7	0.6	8	0	0	0	0	0	7.91843	0	0	0	0	0	low
55	55	pab-MIR396a-p5_2ss19AT20AT	CTCAAGAAAGCTGTGGGATT	20	contig_2805014	+	29	66	CTCAAGAAAGCTGTTGGATTgtaaacagttcaccaagg	24	pab-MIR396a,mtr-MIR396a,gma-MIR396g,gma-MIR396b,gma-MIR396d,gma-MIR396k,ptc-MIR396e,ath-MIR396b,mdm-MIR396d,mdm-MIR396e,mdm-MIR396c,aly-MIR396b,ppe-MIR396b,vvi-MIR396a,mes-MIR396e,atr-MIR396b,lus-MIR396b,cme-MIR396a,bra-MIR396,tcc-MIR396c,ccl-MIR396,bcy-MIR396b,bgy-MIR396b,ama-MIR396,	pab-MIR396a	aatcccgccatgctcTTCCACAGCTTTCTTGAACTAagagtcgatcggatccggtcagttcagagctcaagaaagctgtgggaaaacatgggcggattcg	pab-MIR396a-p5	ctcaagaaagctgtgggaaa	5'	New	gp2b	...........((.(((((((....))))))).))...	24	42.1	-6.8	0.4	0	11	0	16	20	12	0	9.49756	0	15.4972	25.3767	11.3572	middle
56	56	ath-miR396b-3p_L-2_1ss12CT	TCAAGAAAGTTGTGGGAAA	19	contig_394454	-	212	275	atagctaagggaaaaggacagTCAAGAAAGATGTGGGAAAcactttcttcatccttctcgcaaa	16	pab-MIR396a,smo-MIR396,ath-MIR396b,aly-MIR396b,vvi-MIR396b,nta-MIR396c,atr-MIR396b,atr-MIR396c,cme-MIR396a,bra-MIR396,tcc-MIR396c,cca-MIR396c,cca-MIR396a,bcy-MIR396b,bgy-MIR396b,ama-MIR396,	ath-MIR396b	ggtcatacttTTCCACAGCTTTCTTGAACTTtctttttcatttccattgtttttttcttaaacaaaagtaagaagaaaaaaaactttaagattaagcattttggaaGCTCAAGAAAGCTGTGGGAAAacatgaca	ath-miR396b-3p	GCTCAAGAAAGCTGTGGGAAA	5'	Diff	gp2b	...((...((((..((((.....(((((((.(((.....))))))))))..))))))))))...	58	40.6	-14.6	0.6	0	0	0	0	0	6	0	0	0	0	0	5.67859	low
57	57	lus-MIR397a-p5	TATTGAGTGCAGCGTTGATGA	21	contig_943434	+	853	925	tctgcaatggagacaaataggtccgTATTGAGTGCAGCGTTGATCActcgaacaagatttgtctccccgcttt	29	pab-MIR397,mtr-MIR397,gma-MIR397a,gma-MIR397b,ptc-MIR397a,ptc-MIR397b,stu-MIR397,mdm-MIR397a,mdm-MIR397b,ppe-MIR397,vvi-MIR397a,mes-MIR397,atr-MIR397a,lus-MIR397a,lus-MIR397b,tcc-MIR397,sly-MIR397,rco-MIR397,lja-MIR397,csi-MIR397,ssl-MIR397,dpr-MIR397,osa-MIR397b,osa-MIR397a,bdi-MIR397a,bdi-MIR397b,sbi-MIR397,tae-MIR397,hvu-MIR397a,	lus-MIR397a	gatcagagagaccttATTGAGTGCAGCGTTGATGAAgttcgttcattctcagatcttcagcaacgctgctctcgataatgtatctttttatc	lus-MIR397a-p5	tATTGAGTGCAGCGTTGATGA	5'	New	gp2b	...((...((((((((((..((.....(((((((..........)))))))))...))))))))))..))...	67	46.6	-21.6	0.6	25	42	71	6	16	6	24.7451	36.2634	83.2503	5.81144	20.3014	5.67859	middle
57	58	mtr-miR397-5p_L-3R+1	TTGAGTGCAGCGTTGATGA	19	contig_943434	+	853	925	tctgcaatggagacaaataggtccgTATTGAGTGCAGCGTTGATCActcgaacaagatttgtctccccgcttt	29	pab-MIR397,mtr-MIR397,gma-MIR397a,gma-MIR397b,ptc-MIR397a,ptc-MIR397b,stu-MIR397,mdm-MIR397a,mdm-MIR397b,ppe-MIR397,vvi-MIR397a,mes-MIR397,atr-MIR397a,lus-MIR397a,lus-MIR397b,tcc-MIR397,sly-MIR397,rco-MIR397,lja-MIR397,csi-MIR397,ssl-MIR397,dpr-MIR397,osa-MIR397b,osa-MIR397a,bdi-MIR397a,bdi-MIR397b,sbi-MIR397,tae-MIR397,hvu-MIR397a,	mtr-MIR397	ttggagaaacaTCATTGAGTGCAGCGTTGATGaaatcttatgtagcatctagctatcttatagatatcaaatattgcatgcttaatttcaTCTACGCTACACTCAATTATGtttttttaa	mtr-miR397-5p	TCATTGAGTGCAGCGTTGATG	3'	Diff	gp2b	...((...((((((((((..((.....(((((((..........)))))))))...))))))))))..))...	67	46.6	-21.6	0.6	0	18	20	0	0	0	0	15.5415	23.4508	0	0	0	middle
58	59	lus-MIR397a-p3_2ss14GA19TC	TATTGAGTGCAGCATTGACGA	21	contig_1606017	-	1183	1271	ctttgtgtaggaagcatccgcgcctaccgctgtgagattgtgtgatgctatcttgaaaaacaggtgatTATTGACTGCAGCATTGACGA	4	pab-MIR397,lus-MIR397a,lja-MIR397,osa-MIR397b,	lus-MIR397a	gatcagagagaccttATTGAGTGCAGCGTTGATGAAgttcgttcattctcagatcttcagcaacgctgctctcgataatgtatctttttatc	lus-MIR397a-p3	tATTGAGTGCAGCGTTGATGA	3'	New	gp2b	...(((((((..((((((((((.((((....)).))..)))).))))))..((((.....))))..........))))).)).......	79	46.1	-16.9	0.4	212	371	277	64	60	57	209.838	320.327	324.793	61.9887	76.1301	53.9466	middle
59	60	pab-miR397_L-2R+2	ATTGAGTGCAGCGTTGACGAT	21	contig_1656176	-	108	169	actgtgagcctgtgctttgcaattttgaagaagaatgcatgATTGAGTGCAGCGTTCACGAT	1	pab-MIR397,	pab-MIR397	agccgtggcaaccacaTCATTGAGTGCAGCGTTGACGatagaaattccaccaatagatttgataatatctatctatttgtggaatgccattgatattgttaaccctgcactcaatagtatgtttgccaatggct	pab-miR397	TCATTGAGTGCAGCGTTGACG	3'	Diff	gp2b	..((((((((((..(((((((.((((....)))).)))).....)))..))).)))))))..	58	43.5	-22.5	0.8	54	196	372	0	0	0	53.4494	169.229	436.184	0	0	0	middle
60	61	gma-MIR397a-p3_2ss11TG18CG	TGATGAAGTTGCACTCTGA	19	contig_1755698	-	577	638	ctccaaattcactagatcctcctcccattataggtaagaggccTGATGAAGTTGCTCTCTGA	1	gma-MIR397a,	gma-MIR397a	agagaaacaTCATTGAGTGCAGCGTTGATGaagtttcactctcatctcaggtagatgcttaatttatagtgttattgtcatcgacactgcactcaatcatgtttttct	gma-MIR397a-p3	TGATGaagtttcactctca	3'	New	gp2b	...(((.((((..((..((((...((......))...)))).))..)))).)))........	51	45.2	-11.5	0.4	0	0	0	0	4.5	3	0	0	0	0	5.70976	2.8393	low
61	61	gma-MIR397a-p3_2ss11TG18CG	TGATGAAGTTGCACTCTGA	19	contig_339947	-	1146	1240	atccttcaaagaactaaatgtcatagctcctaatctcttatatatgttggaacacataagactacctattgatattTGATGAAGTTGCACTCTGC	1	gma-MIR397a,	gma-MIR397a	agagaaacaTCATTGAGTGCAGCGTTGATGaagtttcactctcatctcaggtagatgcttaatttatagtgttattgtcatcgacactgcactcaatcatgtttttct	gma-MIR397a-p3	TGATGaagtttcactctca	3'	New	gp2b	...(((((......((((((((((((.........((((((...(((....))).))))))....))).))))))))).)))))...........	81	33.7	-10.6	0.3	0	0	0	0	4.5	3	0	0	0	0	5.70976	2.8393	low
62	62	pab-MIR397-p5_1ss1AT	TCATCATTGAGTGCAGCGTT	20	contig_250975	-	1421	1484	TCATCATTGAGCGCAGCGTTgattatgcggagaaggtaagtttttacagggatcactttcagcc	21	pab-MIR397,mtr-MIR397,gma-MIR397b,gma-MIR397a,ptc-MIR397a,ath-MIR397a,mdm-MIR397b,mdm-MIR397a,aly-MIR397a,aly-MIR397b,ppe-MIR397,vvi-MIR397a,nta-MIR397,atr-MIR397b,bna-MIR397b,bna-MIR397a,tcc-MIR397,rco-MIR397,csi-MIR397,osa-MIR397a,bdi-MIR397a,	pab-MIR397	agccgtggcaaccacaTCATTGAGTGCAGCGTTGACGatagaaattccaccaatagatttgataatatctatctatttgtggaatgccattgatattgttaaccctgcactcaatagtatgtttgccaatggct	pab-MIR397-p5	acaTCATTGAGTGCAGCGTT	5'	New	gp2b	(((....)))..((.((((.....))))...((((((..((..(....)..)).)))))).)).	13	45.3	-9	0.3	0	0	0	15	10	8.5	0	0	0	14.5286	12.6884	8.04467	middle
63	62	pab-MIR397-p5_1ss1AT	TCATCATTGAGTGCAGCGTT	20	contig_512892	-	2231	2300	TCATCATTGAGAGCAGCGTTaatgatacggaggaggtatgtcttccctgcagtaaccctcagaatgaatg	21	pab-MIR397,mtr-MIR397,gma-MIR397b,gma-MIR397a,ptc-MIR397a,ath-MIR397a,mdm-MIR397b,mdm-MIR397a,aly-MIR397a,aly-MIR397b,ppe-MIR397,vvi-MIR397a,nta-MIR397,atr-MIR397b,bna-MIR397b,bna-MIR397a,tcc-MIR397,rco-MIR397,csi-MIR397,osa-MIR397a,bdi-MIR397a,	pab-MIR397	agccgtggcaaccacaTCATTGAGTGCAGCGTTGACGatagaaattccaccaatagatttgataatatctatctatttgtggaatgccattgatattgttaaccctgcactcaatagtatgtttgccaatggct	pab-MIR397-p5	acaTCATTGAGTGCAGCGTT	5'	New	gp2b	...(((((..(((....((((.((.((.((((((......)))))).)))).)))).)))..)))))...	64	45.7	-15.6	0.5	0	0	0	15	10	8.5	0	0	0	14.5286	12.6884	8.04467	middle
64	63	mtr-MIR398a-p5	TTTTGTGTTCTCAGGTCACC	20	contig_2970558	+	804	885	attgactagccTATTGTGTTCTCAGGTCACCatcaaaacctatcaggttttatttcttttgtcacatttggttcaggtctgc	4	mtr-MIR398a,ath-MIR398a,mdm-MIR398a,vvi-MIR398a,	mtr-MIR398a	tctcagaGGAGTGACACTGAGAACACAAGattgattaatcatataatgtatttggttgttactagttgatttTGTGTTCTCAGGTCACCCCTTtgagt	mtr-MIR398a-p5	tttTGTGTTCTCAGGTCACC	5'	New	gp2b	...((((((((...((((......((...))...((((((.....))))))...........))))...))))..))))...	76	39	-15.6	0.5	6	11	16	7	10	12	5.93882	9.49756	18.7606	6.78001	12.6884	11.3572	middle
65	64	sbi-MIR437w-p5_2ss4AG18AG	ATTGAATTCTCCGTGAAG	18	contig_21293	+	653	689	aaATTGAATTCTCCGTGAAGatgcggagtaccaacgg	1	sbi-MIR437w,	sbi-MIR437w	taaatctctctaatatttaccaagtttatagaaaaatgcatcaacatttccaacatcaaattagtatcattaaattctccgtgaaatatattcatagtgcatttacttgaacttgtagattttaatagttttttttttctaaaaacttggtgAAAGTTAGAGAAGTTTGACTT	sbi-MIR437w-p5	attaaattctccgtgaaa	5'	New	gp2b	...(((....((((((......))))))...)))...	31	45.9	-9.1	0.5	0	5	0	0	0	7	0	4.31707	0	0	0	6.62502	low
66	65	ptc-MIR472a-p3_3ss9AG17CA20CT	TTTTCCCTGCTCCACCAATTCC	22	contig_1007680	-	841	882	gacagcatcggttagaatgaTTTTCCCTGCTCCTCCAATTCC	1	ptc-MIR472a,	ptc-MIR472a	ttatcgggtgggtgagcggggaagataactttggtttttgagatagtacttgttaTTTTCCCTACTCCACCCATCCCatag	ptc-MIR472a-p3	TTTTCCCTACTCCACCCATCCC	3'	New	gp2b	...((((..((..(((....)))..))))))...........	28	47.6	-4.3	0.2	5	0	0	0	0	5	4.94902	0	0	0	0	4.73216	low
67	66	csi-MIR472-p5_2ss8CT17CA	TTTTTCCTACACCTCCAAT	19	contig_1904555	+	847	918	atTTTTTCCTACACCCCCAATagtatggtgttgctaacacaaatattacacactcgaggaaaaggaaaattg	1	csi-MIR472,	csi-MIR472	gggaagtcttggagatgggtgagttgggaaaataataactttcttcacgacagaaagcaatttTTTTCCCACACCTCCCATCCCtaagattttc	csi-MIR472-p5	tTTTTCCCACACCTCCCAT	5'	New	gp2b	..((((((((..........((((((.(((((...)))))..))))))........))))))))........	62	36.1	-11.4	0.4	3	3.5	0	9	7.5	6	2.96941	3.02195	0	8.71716	9.51627	5.67859	low
68	66	csi-MIR472-p5_2ss8CT17CA	TTTTTCCTACACCTCCAAT	19	contig_444528	+	450	523	atTTTTTCCTATACCTCCAATtacacttttatgcatatgctatcaaccactcataaaaatatataggaaaatag	1	csi-MIR472,	csi-MIR472	gggaagtcttggagatgggtgagttgggaaaataataactttcttcacgacagaaagcaatttTTTTCCCACACCTCCCATCCCtaagattttc	csi-MIR472-p5	tTTTTCCCACACCTCCCAT	5'	New	gp2b	...((((((((((.............(((((((....((........))..)))))))...))))))))))...	68	27	-7.8	0.4	3	3.5	0	9	7.5	6	2.96941	3.02195	0	8.71716	9.51627	5.67859	low
69	67	ptc-miR472a_R-3_1ss9AG	TTTTCCCTGCTCCACCCAT	19	contig_3054132	-	784	926	gaaaTTTTCCCTTCTCCACCCATagcgattctatctcaatggtgttgtctttgagggggatctagaatatgtagtcacactacatgtaagtatttacaacccttcattgtcctttgttgcagggtaaattttagtggaaaata	1	ptc-MIR472a,	ptc-MIR472a	ttatcgggtgggtgagcggggaagataactttggtttttgagatagtacttgttaTTTTCCCTACTCCACCCATCCCatag	ptc-miR472a	TTTTCCCTACTCCACCCATCCC	5'	Diff	gp2b	...(((((((((.....((((.....(((..((((.....))))..)))..(((((((........((((((((.....))))))))..((....))..)))))))...............)))).......)).))))))).	139	37.8	-34.9	0.6	25	9.5	7	9	6	4.5	24.7451	8.20244	8.20777	8.71716	7.61301	4.25894	middle
70	68	ptc-MIR472a-p5_2ss9AG20CT	TTTTCCCTGCTCCACCCATT	20	contig_4065116	-	1032	1090	TTTTCCCTTCTCCACCCATTgcaattccctctcaatgttgttgtctctggggagaatta	1	ptc-MIR472a,	ptc-MIR472a	ttatcgggtgggtgagcggggaagataactttggtttttgagatagtacttgttaTTTTCCCTACTCCACCCATCCCatag	ptc-MIR472a-p5	TTTTCCCTACTCCACCCATC	5'	New	gp2b	.......((((((.((....(((((..............)))))....))))))))...	49	44.1	-12	0.5	353.5	260.5	167	226	145	174.5	349.896	224.919	195.814	218.898	183.981	165.152	middle
71	69	ptc-MIR472a-p5_2ss8AG19CT	TTTCCCTGCTCCACCCATT	19	contig_508520	-	397	467	tgagcTTTCCCTGCTCCACCCATAacaatttctctcttggtgttgttgtctctagagagggtcaatgcatc	1	ptc-MIR472a,	ptc-MIR472a	ttatcgggtgggtgagcggggaagataactttggtttttgagatagtacttgttaTTTTCCCTACTCCACCCATCCCatag	ptc-MIR472a-p5	TTTCCCTACTCCACCCATC	5'	New	gp2b	...((...((((.(((.....((((((((..(......)..)))))))).....))))))).....))...	65	46.5	-18	0.5	2.5	0	4	0	0	0	2.47451	0	4.69016	0	0	0	low
72	70	ppt-miR477a-5p_R+1	CTCTCCCTCAAAGGCTTCCAA	21	contig_931821	+	958	1062	ttcttacCTCTCCCTCAACGGCTTCCAAgaattctgtctgaaaatttcaaaaactctacaaggttgaggaagatagttttggatgccgttgaggaaaggtaaaag	11	ppt-MIR477d,ppt-MIR477e,ppt-MIR477a,ppt-MIR477c,ppt-MIR477b,ppt-MIR477h,ppt-MIR477f,ppt-MIR477g,vvi-MIR477a,mes-MIR477g,mes-MIR477f,	ppt-MIR477b	atgtgttggaacttgggaagcaggtgcttgatcCTCTCCCTCAAAGGCTTCCAacagcatgagctagttttagtgtctcaaatattgtctgttgaggctagctcctgttcagatctgttagaagcctctgtgggagaggagcaatcagctgctgagtggcacctctgatc	ppt-miR477a-5p	CTCTCCCTCAAAGGCTTCCA	5'	Diff	gp2b	...((((((...((((((((((.(((((((...((((((.......((...((((......))))...))))))))))))))).))))))))))..))))))...	99	40	-40.5	1	92	86	11	117	86	81	91.062	74.2536	12.8979	113.323	109.12	76.661	middle
73	71	pab-miR482b_L-3_1ss17CA	TCCCTATTCCTCCAATTCC	19	contig_1225242	-	745	867	atcattggaacattaggttattagggggcattaagaataagagttgaaccaacaaggtacacctcagtttttggaatacccaactttcatctactaaggtcttcTACCTATTCCTCCAATTCC	3	pab-MIR482b,pta-MIR482c,pde-MIR482b,	pab-MIR482b	atgtggatggaagtcttgaggattgggaggataggagaaggctgtttgcttaattctcagttgaaacctgattagTCTTCCCTATTCCTCCCATTCCtattgcctccatcacacatccctt	pab-miR482b	TCTTCCCTATTCCTCCCATTCC	3'	Diff	gp2b	...((((((....(((((....((..(((.((((((....(((.((.(((.....))).)).))).....((((.....))))......)))..))).)))..)))))))....))))))...	117	38.2	-28.8	0.6	0	0	0	3.5	3	0	0	0	0	3.39001	3.80651	0	low
74	72	mdm-miR482c_2ss5TC20TG	TCTTCCCTAACCCTCCCATGCC	22	contig_1229939	-	3076	3142	atcaggcatgggaggaatggaaagactttgctaaagcgtagTCTTCCCTGACCCTCCCATGCCtata	1	mdm-MIR482c,	mdm-MIR482c	ggaataggaaggctttgaggaggtttatggagtggaagggtaggaaagaagtaacttcctttttrggtctcaaattctggagatcgaattTCTTTCCTAACCCTCCCATTCCttcaatttcctaaagrttatcccttttcc	mdm-miR482c	TCTTTCCTAACCCTCCCATTCC	3'	Diff	gp2b	...((((((((((((...((.((((((..((....))..)))))).))....))))))))))))...	61	49.3	-36.4	1.1	32	13.5	0	20	9.5	13	31.6737	11.6561	0	19.3715	12.0539	12.3036	middle
75	73	mes-miR482_L-3_1ss9AG	TCCCTGCTCCACCCATTCC	19	contig_1426361	+	71	106	tttgcatgTCCATGCTCCACCCATTCCacatgtttc	1	mes-MIR482,	mes-MIR482	ggagaaaaagcaaggattttcggaaggttatgagatgggtaagtggggaagataactgtggggctttcgttttgtttgttaTCTTCCCTACTCCACCCATTCCatagctttccgatcgttcctctctctcc	mes-miR482	TCTTCCCTACTCCACCCATTCC	5'	Diff	gp2b	...((((((..(((.......)))...))))))...	30	47.2	-4.3	0.3	36.5	43.5	27.5	22.5	17	17.5	36.1278	37.5585	32.2448	21.7929	21.5702	16.5626	middle
76	74	pab-miR482b_L-4_1ss17CA	CCCTATTCCTCCAATTCC	18	contig_1649331	+	1543	1579	tCCCTATTCCTCCAACTCCcttgatgttgggggacat	3	pab-MIR482b,pta-MIR482c,pde-MIR482b,	pab-MIR482b	atgtggatggaagtcttgaggattgggaggataggagaaggctgtttgcttaattctcagttgaaacctgattagTCTTCCCTATTCCTCCCATTCCtattgcctccatcacacatccctt	pab-miR482b	TCTTCCCTATTCCTCCCATTCC	5'	Diff	gp2b	.......(((((((((((....)).)))))))))...	27	51.4	-13.9	0.7	5	6	6	8.5	13	10	4.94902	5.18049	7.03523	8.23287	16.4949	9.46432	middle
77	75	mdm-miR482c_2ss9AG20TG	TCTTTCCTGACCCTCCCATGCC	22	contig_2476740	+	138	293	gcaaatacatggcgtgcaagtatttaaccggtttgtgtgttcggcatgctatctccaaaaatagcccatacacatgaaaatggctaattcctaaatctatctctcttcttcacacgtgatTCTTTCCTGACCCTTCCATGCCtttgaacgtgcttt	1	mdm-MIR482c,	mdm-MIR482c	ggaataggaaggctttgaggaggtttatggagtggaagggtaggaaagaagtaacttcctttttrggtctcaaattctggagatcgaattTCTTTCCTAACCCTCCCATTCCttcaatttcctaaagrttatcccttttcc	mdm-miR482c	TCTTTCCTAACCCTCCCATTCC	3'	Diff	gp2b	(((....((.((((((.(((...(((.(((.((..(((((..((...(((((........)))))))..)))))..))..))).)))......................(((....))).............))).))))))..))....)))...	153	41.7	-31.5	0.5	11	4.5	0	4	3.5	0	10.8878	3.88537	0	3.87429	4.44093	0	middle
78	76	mes-miR482_L-4_1ss9AG	CCCTGCTCCACCCATTCC	18	contig_2543060	+	1162	1245	attgagcagatgtagagaccagcactgcagctgactagcccattcctctgccttcctgatctccatCTCTGCTCCACCCATTCC	1	mes-MIR482,	mes-MIR482	ggagaaaaagcaaggattttcggaaggttatgagatgggtaagtggggaagataactgtggggctttcgttttgtttgttaTCTTCCCTACTCCACCCATTCCatagctttccgatcgttcctctctctcc	mes-miR482	TCTTCCCTACTCCACCCATTCC	3'	Diff	gp2b	...(((((((..(.((((.(((....((((..((.........))..))))....))).)))).)..)))))))..........	71	53.6	-23.5	0.5	104.5	116.5	113.5	79.5	71	44.5	103.435	100.588	133.083	77.0016	90.0873	42.1162	middle
79	77	pab-MIR482b-p3_2ss2CT17CA_2	TTTTCCCTATTCCTCCAATT	20	contig_2785939	-	956	1062	ctggtgattggaggaatgtattatataaggagagaagttatcaagttaaattccaagaagggttgaatgtgagtactagaaaTTTTACCTATTCCTCCAATTgcaca	3	pab-MIR482b,pta-MIR482c,pde-MIR482b,	pab-MIR482b	atgtggatggaagtcttgaggattgggaggataggagaaggctgtttgcttaattctcagttgaaacctgattagTCTTCCCTATTCCTCCCATTCCtattgcctccatcacacatccctt	pab-MIR482b-p3	TCTTCCCTATTCCTCCCATT	3'	New	gp2b	...(..(((((((((((..........(((..((((((..(((..((((..(((.....)))))))...)))..))).....)))..))))))))))))))..)...	101	34.6	-26.2	0.7	3	4	3	9.5	4	8	2.96941	3.45366	3.51762	9.20145	5.07534	7.57146	low
80	77	pab-MIR482b-p3_2ss2CT17CA_2	TTTTCCCTATTCCTCCAATT	20	contig_487857	-	311	357	gaatgtgagcattgagattTTTTACCTATTCCTCCAATTtcacaatt	3	pab-MIR482b,pta-MIR482c,pde-MIR482b,	pab-MIR482b	atgtggatggaagtcttgaggattgggaggataggagaaggctgtttgcttaattctcagttgaaacctgattagTCTTCCCTATTCCTCCCATTCCtattgcctccatcacacatccctt	pab-MIR482b-p3	TCTTCCCTATTCCTCCCATT	3'	New	gp2b	...((((((.((((((...............)).))))))))))...	41	31.9	-6.6	0.4	3	4	3	9.5	4	8	2.96941	3.45366	3.51762	9.20145	5.07534	7.57146	low
81	78	gra-MIR482-p5_2ss15GT17AG	TTTGAATTTTCTCTTTGTTTT	21	contig_3237434	-	688	798	ttacTTTGAATTTTCTCTTTGTTTTgtgatcttttgaagactgcataggaatggctatccatgtcttcaatcgtttcatcatagtcatcattagatacatattcaaagaaa	1	gra-MIR482,	gra-MIR482	gaaggaggaaaaggagagaccgtttctggaaattttcggaatggaggagttggaaagattttgaattttctctgtattttaataatgaaaaaTCTTTCCAATTCCTCCCATTCCactgatttccagcacttcctctccattttcttaccttt	gra-MIR482-p5	tttgaattttctctgtatttt	5'	New	gp2b	...((((((((....(((.((..(((((((...((((((((((.((((......)))).)).)))))))).......)))))))....))..))).....))))))))...	105	30.6	-25.7	0.8	0	0	0	0	3	7.5	0	0	0	0	3.80651	7.09824	low
82	78	gra-MIR482-p5_2ss15GT17AG	TTTGAATTTTCTCTTTGTTTT	21	contig_4238411	-	604	645	tTTTGAATTTTCTCTTTGTTTTgtcactagatgatgtcaact	1	gra-MIR482,	gra-MIR482	gaaggaggaaaaggagagaccgtttctggaaattttcggaatggaggagttggaaagattttgaattttctctgtattttaataatgaaaaaTCTTTCCAATTCCTCCCATTCCactgatttccagcacttcctctccattttcttaccttt	gra-MIR482-p5	tttgaattttctctgtatttt	5'	New	gp2b	..((((....(((((.((......))..))).))..))))..	38	28.6	-3.6	0.3	0	0	0	0	3	7.5	0	0	0	0	3.80651	7.09824	low
83	79	pab-miR482c_R-4_1ss11TG	TCTTTCCTACGCCTCCCA	18	contig_3380508	+	960	1102	tgtgggtccatcaactcccatccataaatctttataggatccaatgtaaattggaacctagcatgaatgattttttattggtcatttacataccccaactatgacatattatacatatctTCTTTCTTACGCCTCCCAtaatg	6	pab-MIR482c,pde-MIR482a,ptc-MIR1448,vvi-MIR482,ghr-MIR482a,sly-MIR482e,	pab-MIR482c	tgagaagggaatggatgtgttttgtggatggaagtcttgaggagtgggagcagaggataagactgctgctttgaatattatcagTCTTTCCTACTCCTCCCATTCCtattggcttcaccacacatcccttcccaacg	pab-miR482c	TCTTTCCTACTCCTCCCATTCC	3'	Diff	gp2b	((((((...........(((.....(((((((((((((.((((((....)))))).))))...)))).))))).....))).......((((.......))))...............................))))))...	140	35	-25.1	0.5	28	25	17	22	15	36	27.7145	21.5854	19.9332	21.3086	19.0325	34.0716	middle
84	80	pab-MIR482b-p3_2ss2CT17CA_1	TTTTCCCTATTCCTCCAAT	19	contig_766640	-	42	141	tgattggaggaatgttttctacataaagagaaggtattgaatcgggctccaagaagggttgaaaatgatcactgatagtTTTTACCTATTCCTCCAATtg	3	pab-MIR482b,pta-MIR482c,pde-MIR482b,	pab-MIR482b	atgtggatggaagtcttgaggattgggaggataggagaaggctgtttgcttaattctcagttgaaacctgattagTCTTCCCTATTCCTCCCATTCCtattgcctccatcacacatccctt	pab-MIR482b-p3	TCTTCCCTATTCCTCCCAT	3'	New	gp2b	.((((((((((((.((((((......))))))((((..(((((((..(((.....)))..((......)).)))))..))..)))).)))))))))))).	98	37	-27.1	0.7	3	4	3	9.5	4	8	2.96941	3.45366	3.51762	9.20145	5.07534	7.57146	low
85	81	pab-miR482b_R-1_2ss2CT17CA	TTTTCCCTATTCCTCCAATTC	21	contig_787669	-	789	913	TTTTCCATATTCCTCCAATTCttccattcttcattattctatactttcattcttcattcaattgttccagatcccaccattctttattctttgaaggataagtatgtttccaaggatagagaaca	3	pab-MIR482b,pta-MIR482c,pde-MIR482b,	pab-MIR482b	atgtggatggaagtcttgaggattgggaggataggagaaggctgtttgcttaattctcagttgaaacctgattagTCTTCCCTATTCCTCCCATTCCtattgcctccatcacacatccctt	pab-miR482b	TCTTCCCTATTCCTCCCATTCC	5'	Diff	gp2b	..................(((((..((((((........(((((((..((((((((...(((......(((.........)))..)))...))))))))))))))).....)))))).)))))..	105	32	-14.5	0.4	14	0	0	18	19	34	13.8573	0	0	17.4343	24.1079	32.1787	middle
86	82	osa-miR529b_2ss18GT20TA	AGAAGAGAGAGAGTACATCAT	21	contig_1013203	+	375	515	catatttactcaacataacagtcaatagaattctcaacataaccctatgttcagtttaggaattaaaaataatgtaaagaatacttaataagagagaatgtattgctacttttttatcttAGAAGAGAGAGAGTAGATCAT	5	osa-MIR529a,osa-MIR529b,bdi-MIR529,sbi-MIR529,zma-MIR529,	osa-MIR529b	atcgtgaaggctaaatggAGAAGAGAGAGAGTACAGCTTtgggcggtttagttgttagatggtggaagtacttgcgacgcctactacccttttcaccaaggctgtacgctccctcttcttctcttagctttttatgat	osa-miR529b	AGAAGAGAGAGAGTACAGCTT	3'	Diff	gp2b	...((((((((........((.(((((..((((((........((((.........))))............(((.(((....))).)))...)))))).))))))).((((((((...))))))))...))))))))...	135	27	-24.6	0.6	0	0	0	10	0	9	0	0	0	9.68573	0	8.51789	low
87	83	osa-miR529b_R-1	AGAAGAGAGAGAGTACAGCT	20	contig_168227	-	1210	1237	aaacAGAAGAGAGAGAGTTCAGCTggga	1	osa-MIR529b,	osa-MIR529b	atcgtgaaggctaaatggAGAAGAGAGAGAGTACAGCTTtgggcggtttagttgttagatggtggaagtacttgcgacgcctactacccttttcaccaaggctgtacgctccctcttcttctcttagctttttatgat	osa-miR529b	AGAAGAGAGAGAGTACAGCTT	3'	Diff	gp2b	...(((..(((......)))..)))...	22	46.4	-3.3	0.3	0	0	0	36	50.5	27	0	0	0	34.8686	64.0762	25.5537	middle
88	84	ppt-miR529e_L-1_1ss20CT	GAAGAGAGAGAGTACAGCTC	20	contig_1766831	+	938	1079	attggttggcatttcaaatatgtcatgctttgtaagcaatggacatcaaggcgtaaccgtttttaaacattgcttggcgatgctttccatagtgcaaagaataaaatgcattactgttggGAAGAGAGAAAGTACAGCTCta	3	ppt-MIR529e,ppt-MIR529f,osa-MIR529b,	ppt-MIR529f	tgcacaattttctcactcatgctgggatcAGAAGAGAGAGAGTACAGCCCaacggccgatgttcagttggaacgggctgtgctctctctcttcttgttccaacctgggtgcatttccgttct	ppt-miR529e	AGAAGAGAGAGAGTACAGCCC	3'	Diff	gp2b	...(((((...((((..............((((((((((((......((..((....))..))....))))))))).)))..((((((((((((((..........)))))))....)))))))...))))...)))))...	136	38	-34.1	0.6	0	0	0	44.5	62.5	37	0	0	0	43.1015	79.3022	35.018	middle
89	84	ppt-miR529e_L-1_1ss20CT	GAAGAGAGAGAGTACAGCTC	20	contig_1851548	+	322	445	gtttcaacatttaGAAGAGAGAGAGTACAGCTAggagtaaagcatattcaggaaagactactggattattggtcacagcttgattccttggcccacttttgcaaccttttccaagtgctgatta	3	ppt-MIR529f,ppt-MIR529e,osa-MIR529b,	ppt-MIR529e	tcagcaatttactcactcatgctgggatcAGAAGAGAGAGAGTACAGCCCaagagcaaccgcttagttggaatgggctgtgctctctctcttctggttccaacctgagtgcatgtcggttgt	ppt-miR529e	AGAAGAGAGAGAGTACAGCCC	5'	Diff	gp2b	...(((.(((((.((((((.((((((...(((((((((.((((..((((((.........))))))...((....)))))).))))).))))..)))))).....)))))).))))).)))...	118	40.3	-31.7	0.6	0	0	0	44.5	62.5	37	0	0	0	43.1015	79.3022	35.018	middle
90	85	ppt-miR529e_L+1_1ss21CT	CAGAAGAGAGAGAGTACAGCTC	22	contig_984793	+	1215	1311	ttagggttttctcattgttttacaggtcgtcttattcaccgcagtctctcaggtcttattcaccaagacctttagCAGAAGAGAGAGAGTACAGCCC	9	ppt-MIR529e,ppt-MIR529f,ath-MIR156j,hpa-MIR156a,osa-MIR529a,osa-MIR529b,bdi-MIR529,sbi-MIR529,zma-MIR529,	ppt-MIR529f	tgcacaattttctcactcatgctgggatcAGAAGAGAGAGAGTACAGCCCaacggccgatgttcagttggaacgggctgtgctctctctcttcttgttccaacctgggtgcatttccgttct	ppt-miR529e	AGAAGAGAGAGAGTACAGCCC	3'	Diff	gp2b	...(((((..(((...........(((..........)))....(((((((((((((.......))))))).........)))))))))...)))))	42	44.3	-23.2	0.5	0	0	0	16	23	18	0	0	0	15.4972	29.1832	17.0358	middle
91	86	osa-MIR821a-p3_1ss12AG	GATGAAGAAATGAAAAAA	18	contig_2324027	+	736	769	taatttcatagaaaatGATGAAGAAATGAAAAAA	1	osa-MIR821a,	osa-MIR821a	gatatcagctgaaaAAGTCATCAACAAAAAAGTTGAATaactcatcaagatctaaaacttttattttggtcatttcttcatacgacaaagtgatagtaacattgttcacagaattgacatatctcttatctggttttataaactataacacatatatgtaaaatttgtgaataatattactaacatttcgtcagatgaagaaataaaaaaataaaagttatagatcttgatgagttattcaactttgttgttgatgactttttcaattgaaatc	osa-MIR821a-p3	gatgaagaaataaaaaaa	3'	New	gp2b	...((((((........))))))...........	20	17.6	-2.4	0.4	2.5	3.5	0	0	2.5	8.5	2.47451	3.02195	0	0	3.17209	8.04467	low
92	86	osa-MIR821a-p3_1ss12AG	GATGAAGAAATGAAAAAA	18	contig_3361031	+	160	194	taatttttttcttcattGATGAAGAAATGAAAAAA	1	osa-MIR821a,	osa-MIR821a	gatatcagctgaaaAAGTCATCAACAAAAAAGTTGAATaactcatcaagatctaaaacttttattttggtcatttcttcatacgacaaagtgatagtaacattgttcacagaattgacatatctcttatctggttttataaactataacacatatatgtaaaatttgtgaataatattactaacatttcgtcagatgaagaaataaaaaaataaaagttatagatcttgatgagttattcaactttgttgttgatgactttttcaattgaaatc	osa-MIR821a-p3	gatgaagaaataaaaaaa	3'	New	gp2b	...((..((((((((....))))))))..))....	28	17.1	-6.9	1.2	2.5	3.5	0	0	2.5	8.5	2.47451	3.02195	0	0	3.17209	8.04467	low
93	87	gma-MIR828b-p5_1ss21CT	TCTTGCTCAAATGAGTATTCT	21	contig_613324	+	2687	2708	TCTTGCTCAAATGAGTATTCCA	13	gma-MIR828b,gma-MIR828a,ptc-MIR828b,ptc-MIR828a,mdm-MIR828b,mdm-MIR828a,ppe-MIR828,vvi-MIR828a,mes-MIR828a,mes-MIR828b,atr-MIR828,cme-MIR828,ssl-MIR828,	gma-MIR828b	ttgtaatgttTCTTGCTCAAATGAGTATTCCAaccacagtcacatttggcatgaatgtgtgccactgtccccaaaggctgagatgctcatttgagcaagcaatgttaaaa	gma-MIR828b-p5	TCTTGCTCAAATGAGTATTCC	5'	New	gp2b	...(((((....))))).....	14	36.4	-4.5	0.6	18.5	25	21	26	22	19.5	18.3114	21.5854	24.6233	25.1829	27.9144	18.4554	middle
93	88	gma-miR828a	TCTTGCTCAAATGAGTATTCCA	22	contig_613324	+	2687	2708	TCTTGCTCAAATGAGTATTCCA	13	gma-MIR828b,gma-MIR828a,ptc-MIR828b,ptc-MIR828a,mdm-MIR828b,mdm-MIR828a,ppe-MIR828,vvi-MIR828a,mes-MIR828a,mes-MIR828b,atr-MIR828,cme-MIR828,ssl-MIR828,	gma-MIR828a	ttgtaatgttTCTTGCTCAAATGAGTATTCCAaccacagtcacatttggcatgaatattgtgtgccactgtcctcaaaggatgagatgctcatttgaccaagcaatgttaaaa	gma-miR828a	TCTTGCTCAAATGAGTATTCCA	3'	Yes	gp2b	...(((((....))))).....	14	36.4	-4.5	0.6	5.5	3	0	0	0	2.5	5.44392	2.59024	0	0	0	2.36608	low
94	87	gma-MIR828b-p5_1ss21CT	TCTTGCTCAAATGAGTATTCT	21	contig_920924	+	1039	1060	TCTTGCTCAAATGAGTATTCCA	13	gma-MIR828b,gma-MIR828a,ptc-MIR828b,ptc-MIR828a,mdm-MIR828b,mdm-MIR828a,ppe-MIR828,vvi-MIR828a,mes-MIR828a,mes-MIR828b,atr-MIR828,cme-MIR828,ssl-MIR828,	gma-MIR828b	ttgtaatgttTCTTGCTCAAATGAGTATTCCAaccacagtcacatttggcatgaatgtgtgccactgtccccaaaggctgagatgctcatttgagcaagcaatgttaaaa	gma-MIR828b-p5	TCTTGCTCAAATGAGTATTCC	5'	New	gp2b	...(((((....))))).....	14	36.4	-4.5	0.6	18.5	25	21	26	22	19.5	18.3114	21.5854	24.6233	25.1829	27.9144	18.4554	middle
94	88	gma-miR828a	TCTTGCTCAAATGAGTATTCCA	22	contig_920924	+	1039	1060	TCTTGCTCAAATGAGTATTCCA	13	gma-MIR828b,gma-MIR828a,ptc-MIR828b,ptc-MIR828a,mdm-MIR828b,mdm-MIR828a,ppe-MIR828,vvi-MIR828a,mes-MIR828a,mes-MIR828b,atr-MIR828,cme-MIR828,ssl-MIR828,	gma-MIR828a	ttgtaatgttTCTTGCTCAAATGAGTATTCCAaccacagtcacatttggcatgaatattgtgtgccactgtcctcaaaggatgagatgctcatttgaccaagcaatgttaaaa	gma-miR828a	TCTTGCTCAAATGAGTATTCCA	3'	Yes	gp2b	...(((((....))))).....	14	36.4	-4.5	0.6	5.5	3	0	0	0	2.5	5.44392	2.59024	0	0	0	2.36608	low
95	89	vvi-MIR845b-p5_2ss15CA19AT	TCTTCAATGACATCACATT	19	contig_3894912	+	887	1025	TCTTCAATGACATCACCTTttctttatgacactatccatattccacacaattagcaatagggctttcttcatggctaagaatgattttataagtcccaaaattttgcaatggttagaatcttgtgacttcaacattaaa	1	vvi-MIR845b,	vvi-MIR845b	tttcacttgattagttccttcatgagttatttcaagcaatctccaaatttccttagcagatttacattggcatattctattatattcattcctatccatagcacattgcaaagtaaaaacgactttagcatttaattgaaaatttcttctatcaagctcattccattcttgcttgagttttggaaccaaaactccatcaactaatttagtgggaaaagttgggccatcttcaatgacatcccatacatctaaatcagttgattgtaagtaccaagtcattctaactttccaatagggatagtcggttcccgtaaagaatggagctctatgttttgaacaattttcagtttgagatgagcttgatggaacaaccattttcctcttagatgattaagtctt…	vvi-MIR845b-p5	tcttcaatgacatcccata	5'	New	gp2b	.......(((..((((...((((.((((........)))).............((((..((((((...((((........))))......)))))).......)))).......))))....))))..)))........	124	32.4	-18.9	0.4	0	0	0	0	5.5	0	0	0	0	0	6.9786	0	low
96	89	vvi-MIR845b-p5_2ss15CA19AT	TCTTCAATGACATCACATT	19	contig_861641	-	603	649	acagtagatagtTCTTCAATGGCATCACATTctttagcttcaacttt	1	vvi-MIR845b,	vvi-MIR845b	tttcacttgattagttccttcatgagttatttcaagcaatctccaaatttccttagcagatttacattggcatattctattatattcattcctatccatagcacattgcaaagtaaaaacgactttagcatttaattgaaaatttcttctatcaagctcattccattcttgcttgagttttggaaccaaaactccatcaactaatttagtgggaaaagttgggccatcttcaatgacatcccatacatctaaatcagttgattgtaagtaccaagtcattctaactttccaatagggatagtcggttcccgtaaagaatggagctctatgttttgaacaattttcagtttgagatgagcttgatggaacaaccattttcctcttagatgattaagtctt…	vvi-MIR845b-p5	tcttcaatgacatcccata	5'	New	gp2b	..(((.((.((((....((((......))))....)))))).)))..	43	34	-5.4	0.3	0	0	0	0	5.5	0	0	0	0	0	6.9786	0	low
97	90	cme-MIR854-p3_2ss3TC17GT	AACGGGGGAAGTCGATTTT	19	contig_180	+	3914	3956	ccatctccgatcctcccgccgaggAACGGGGGAAGTCGATTTT	1	cme-MIR854,	cme-MIR854	aatcagtggaGATGAGGATAGTGAGGAGGAGgaagacacaggaatgggggaagtcgatgttgagaatgcaggtcctgggatcactgagtaatgattgttgtaggaattttgtaggaacagagaaaaaggttttcactttaagagactgacacatacttgagttattacagttggggaaattaacatgtctgtattgtgctctcattctttctcttgatatcaaatgataaaagcttatgtggttctcttttcgagtgtatttttgctattgtccaaatcattttcctcctaaagtgattttgtaatggaaataagtcatttttttaaaaaaggaaatctaaaatcattctaaaattttaaagaatcgcttggtagttgcaaatgcagtggttaaactca…	cme-MIR854-p3	aatgggggaagtcgatgtt	3'	New	gp2b	...((((((.(((((.....))))).))))))...........	29	60.5	-15.5	0.6	0	0	0	5	5	0	0	0	0	4.84287	6.34418	0	low
98	91	ppt-MIR894-p5_1ss10CT	GTTTCACGTTGGGTTCACCA	20	contig_4208178	-	1147	1287	GATTCACGTTGGGTTCACCAaaatgtaatgatggtgaaggtgatcattatgggatataaaaggaaatgtgaagataactctcttaatggagaaaGTTTCACGTCGGGTTCACCAcaatgtaatgatgtggtagatttgtat	1	ppt-MIR894,	ppt-MIR894	cataattcaaataatccaaaaaaaataaaccaaataccttccacctcaagCGTTTCACGTCGGGTTCACCaaatatgttgtattatgtgaagttttgattgagaatgcaccgagcacttggctatggaaggtaaaagaaaattgcaacaaaaagtcctaacaatccaataggattatagaaaatttataattaaacgttaacaatcataatcaaacaata	ppt-MIR894-p5	GTTTCACGTCGGGTTCACCa	5'	New	gp2b	(((.(((.(.....((((((...........))))))).))))))....................((((((((.....(((((....)))))...))))))))(..((..((((((.........))))))..))..)...	45	36.9	-31.1	0.6	17.5	8.5	3.5	4	4.5	3.5	17.3216	7.33902	4.10389	3.87429	5.70976	3.31251	middle
98	92	ppt-MIR894-p3	GTTTCACGTCGGGTTCACCA	20	contig_4208178	-	1147	1287	GATTCACGTTGGGTTCACCAaaatgtaatgatggtgaaggtgatcattatgggatataaaaggaaatgtgaagataactctcttaatggagaaaGTTTCACGTCGGGTTCACCAcaatgtaatgatgtggtagatttgtat	1	ppt-MIR894,	ppt-MIR894	cataattcaaataatccaaaaaaaataaaccaaataccttccacctcaagCGTTTCACGTCGGGTTCACCaaatatgttgtattatgtgaagttttgattgagaatgcaccgagcacttggctatggaaggtaaaagaaaattgcaacaaaaagtcctaacaatccaataggattatagaaaatttataattaaacgttaacaatcataatcaaacaata	ppt-MIR894-p3	GTTTCACGTCGGGTTCACCa	3'	New	gp2b	(((.(((.(.....((((((...........))))))).))))))....................((((((((.....(((((....)))))...))))))))(..((..((((((.........))))))..))..)...	45	36.9	-31.1	0.6	104.5	76	111.5	56.5	10.5	22	103.435	65.6195	130.738	54.7244	13.3228	20.8215	middle
99	93	ppt-MIR894-p3_1ss10CT	GTTTCACGTTGGGTTCACCA	20	contig_1210051	-	75	142	gagtaggaaaagaagagcgaatttaacctactctaaggtagagtaaGTTTCACGTTGGGTTCACTAga	1	ppt-MIR894,	ppt-MIR894	cataattcaaataatccaaaaaaaataaaccaaataccttccacctcaagCGTTTCACGTCGGGTTCACCaaatatgttgtattatgtgaagttttgattgagaatgcaccgagcacttggctatggaaggtaaaagaaaattgcaacaaaaagtcctaacaatccaataggattatagaaaatttataattaaacgttaacaatcataatcaaacaata	ppt-MIR894-p3	GTTTCACGTCGGGTTCACCa	3'	New	gp2b	...((((((......((((.....(((.(((((((...))))))).)))...))))...))).)))..	63	39.7	-11.7	0.4	17.5	8.5	3.5	4	4.5	3.5	17.3216	7.33902	4.10389	3.87429	5.70976	3.31251	middle
100	94	ppt-MIR894-p3_1ss11GA	GTTTCACGTCAGGTTCACCA	20	contig_1510868	-	513	607	taagaaatgagatatcaatgtgattaggatccaatgtaccccctatataaacaatccaagacttacctagtttttGTTTCACGTCAGGTTCACAA	1	ppt-MIR894,	ppt-MIR894	cataattcaaataatccaaaaaaaataaaccaaataccttccacctcaagCGTTTCACGTCGGGTTCACCaaatatgttgtattatgtgaagttttgattgagaatgcaccgagcacttggctatggaaggtaaaagaaaattgcaacaaaaagtcctaacaatccaataggattatagaaaatttataattaaacgttaacaatcataatcaaacaata	ppt-MIR894-p3	GTTTCACGTCGGGTTCACCa	3'	New	gp2b	...((..(((((((....(((...((((.............)))).....)))....((((((.....)))))))))))))..))..........	82	34.7	-12.3	0.4	60.5	44	33.5	18.5	6.5	10	59.8831	37.9902	39.2801	17.9186	8.24743	9.46432	middle
101	94	ppt-MIR894-p3_1ss11GA	GTTTCACGTCAGGTTCACCA	20	contig_923609	-	822	904	aaatgaagagaaatttgaagatggattcttttaacgagttgtgctcgatcaaaaggtctttaaGTTTCACGTCAGGTTCACCA	1	ppt-MIR894,	ppt-MIR894	cataattcaaataatccaaaaaaaataaaccaaataccttccacctcaagCGTTTCACGTCGGGTTCACCaaatatgttgtattatgtgaagttttgattgagaatgcaccgagcacttggctatggaaggtaaaagaaaattgcaacaaaaagtcctaacaatccaataggattatagaaaatttataattaaacgttaacaatcataatcaaacaata	ppt-MIR894-p3	GTTTCACGTCGGGTTCACCa	3'	New	gp2b	...(((...(((((((((((((.....(((((..((((.....))))...))))))))))))))))))...)))((....)).	71	36.1	-21	0.7	60.5	44	33.5	18.5	6.5	10	59.8831	37.9902	39.2801	17.9186	8.24743	9.46432	middle
102	95	ppt-MIR894-p3_1ss9CT	TTTCACGTTGGGTTCACCA	19	contig_1550853	+	28	142	ttaacccaacatatttagagggtacataacacccataaaataattggagagagaatatggaataaaaataaaaaggaaaatgagaaataactagtaTTTCACGTTGGGTTCACCA	1	ppt-MIR894,	ppt-MIR894	cataattcaaataatccaaaaaaaataaaccaaataccttccacctcaagCGTTTCACGTCGGGTTCACCaaatatgttgtattatgtgaagttttgattgagaatgcaccgagcacttggctatggaaggtaaaagaaaattgcaacaaaaagtcctaacaatccaataggattatagaaaatttataattaaacgttaacaatcataatcaaacaata	ppt-MIR894-p3	TTTCACGTCGGGTTCACCa	3'	New	gp2b	..((((((((.(((((...((((.......))))...))))).........................................((((((.....))))))..)))))))).....	108	30.4	-20	0.6	44.5	33.5	56	13	12	12	44.0463	28.9244	65.6622	12.5915	15.226	11.3572	middle
103	95	ppt-MIR894-p3_1ss9CT	TTTCACGTTGGGTTCACCA	19	contig_487079	+	111	148	ttggagcacgatgtttaatTTTCACGTTGGGTTCACCA	1	ppt-MIR894,	ppt-MIR894	cataattcaaataatccaaaaaaaataaaccaaataccttccacctcaagCGTTTCACGTCGGGTTCACCaaatatgttgtattatgtgaagttttgattgagaatgcaccgagcacttggctatggaaggtaaaagaaaattgcaacaaaaagtcctaacaatccaataggattatagaaaatttataattaaacgttaacaatcataatcaaacaata	ppt-MIR894-p3	TTTCACGTCGGGTTCACCa	3'	New	gp2b	...((((.((((((.........)))))).))))....	31	42.1	-8.2	0.5	44.5	33.5	56	13	12	12	44.0463	28.9244	65.6622	12.5915	15.226	11.3572	middle
104	96	ppt-MIR894-p3_1ss1TA	ATTCACGTCGGGTTCACCA	19	contig_1650989	+	1456	1510	ataatgtgaataaaactcaatcaagggtgaagtaagATTCACGTCGGGTTCACCA	1	ppt-MIR894,	ppt-MIR894	cataattcaaataatccaaaaaaaataaaccaaataccttccacctcaagCGTTTCACGTCGGGTTCACCaaatatgttgtattatgtgaagttttgattgagaatgcaccgagcacttggctatggaaggtaaaagaaaattgcaacaaaaagtcctaacaatccaataggattatagaaaatttataattaaacgttaacaatcataatcaaacaata	ppt-MIR894-p3	TTTCACGTCGGGTTCACCa	3'	New	gp2b	...((((((((...(((..((.....))..)))...)))))))).((.....)).	41	38.2	-11.7	0.6	24	11	32	7	2.5	0	23.7553	9.49756	37.5212	6.78001	3.17209	0	middle
105	96	ppt-MIR894-p3_1ss1TA	ATTCACGTCGGGTTCACCA	19	contig_2010272	+	1068	1138	aaaggagataagaatgaacatgaaaatgaatcactcaatagtggcttaatATTCACGTCGGGTTCACCAaa	1	ppt-MIR894,	ppt-MIR894	cataattcaaataatccaaaaaaaataaaccaaataccttccacctcaagCGTTTCACGTCGGGTTCACCaaatatgttgtattatgtgaagttttgattgagaatgcaccgagcacttggctatggaaggtaaaagaaaattgcaacaaaaagtcctaacaatccaataggattatagaaaatttataattaaacgttaacaatcataatcaaacaata	ppt-MIR894-p3	TTTCACGTCGGGTTCACCa	3'	New	gp2b	...((.((......(((...((((..(((..((((....))))..)))...))))..)))...)).))...	65	35.2	-10.3	0.4	24	11	32	7	2.5	0	23.7553	9.49756	37.5212	6.78001	3.17209	0	middle
106	97	ppt-MIR894-p3_1ss2TA	GATTCACGTCGGGTTCACCA	20	contig_3013286	-	756	839	agcctatgttgggtattcgatacaactatgttcaaccaaaaggttatatatttGATTCACGTCGGGTTCACCAaaatatagata	1	ppt-MIR894,	ppt-MIR894	cataattcaaataatccaaaaaaaataaaccaaataccttccacctcaagCGTTTCACGTCGGGTTCACCaaatatgttgtattatgtgaagttttgattgagaatgcaccgagcacttggctatggaaggtaaaagaaaattgcaacaaaaagtcctaacaatccaataggattatagaaaatttataattaaacgttaacaatcataatcaaacaata	ppt-MIR894-p3	GTTTCACGTCGGGTTCACCa	3'	New	gp2b	...(((((((((..(..((((.(((.(((((..((((....))))))))).)))......))))..)...)))..))))))...	78	34.5	-17.3	0.6	9	3.5	5	3	0	0	8.90824	3.02195	5.86269	2.90572	0	0	low
107	98	ppt-miR894_1ss3TA	CGATTCACGTCGGGTTCACC	20	contig_3198193	-	79	140	aaagaaaaaatgtgaataagattgaactaaaaggttggtgtaCGATTCACATCGGGTTCACC	1	ppt-MIR894,	ppt-MIR894	cataattcaaataatccaaaaaaaataaaccaaataccttccacctcaagCGTTTCACGTCGGGTTCACCaaatatgttgtattatgtgaagttttgattgagaatgcaccgagcacttggctatggaaggtaaaagaaaattgcaacaaaaagtcctaacaatccaataggattatagaaaatttataattaaacgttaacaatcataatcaaacaata	ppt-miR894	CGTTTCACGTCGGGTTCACC	3'	Diff	gp2b	...(((...((((((((........(((((....))))).....))))))))....)))...	56	35.5	-11.3	0.5	3.5	2.5	0	0	0	0	3.46431	2.15854	0	0	0	0	low
108	99	ppt-miR894_R+1	CGTTTCACGTCGGGTTCACCA	21	contig_321607	-	408	541	ttatgagccatgatggaagaaaaataaggatccaagagtattaaaacatgggttctctaaatgattaagaaaaatatgaataatatgtgtgcctaattagaaggtttcgtgttCGTTTCACATCGGGTTCACCA	1	ppt-MIR894,	ppt-MIR894	cataattcaaataatccaaaaaaaataaaccaaataccttccacctcaagCGTTTCACGTCGGGTTCACCaaatatgttgtattatgtgaagttttgattgagaatgcaccgagcacttggctatggaaggtaaaagaaaattgcaacaaaaagtcctaacaatccaataggattatagaaaatttataattaaacgttaacaatcataatcaaacaata	ppt-miR894	CGTTTCACGTCGGGTTCACC	3'	Diff	gp2b	...((((((.(((((((((.......((((((((...((......)).)))))))).........................((((((...((((.......))))..))))))..)))).)))))))))))...	128	33.6	-29.7	0.7	61	29.5	4	26.5	3.5	12.5	60.378	25.4707	4.69016	25.6672	4.44093	11.8304	middle
109	100	ppt-miR894_L-2R+1	TTTCACGTCGGGTTCACCA	19	contig_336575	-	1169	1286	gtaTTTCACGTCGGGTTCACCAaatttgtacatgtaaaaaaactaatgtgcctttcatatgcacttgactccttatgggtataggccaaggtagtcgacgtagaggatgatgaaatga	1	ppt-MIR894,	ppt-MIR894	cataattcaaataatccaaaaaaaataaaccaaataccttccacctcaagCGTTTCACGTCGGGTTCACCaaatatgttgtattatgtgaagttttgattgagaatgcaccgagcacttggctatggaaggtaaaagaaaattgcaacaaaaagtcctaacaatccaataggattatagaaaatttataattaaacgttaacaatcataatcaaacaata	ppt-miR894	CGTTTCACGTCGGGTTCACC	5'	Diff	gp2b	.(((((((((((.((....))......((((((............))))))...((.((((...((((((((((...(((....))))))).)))))))))))).)))).))))))).	116	39.8	-27.5	0.6	182	127	176.5	65.5	33	40	180.144	109.654	206.953	63.4416	41.8716	37.8573	middle
110	100	ppt-miR894_L-2R+1	TTTCACGTCGGGTTCACCA	19	contig_896234	+	406	544	tttcgatggtgtctatgatgactagtttttgagatttttagagttttaaaaatctaaaattaagttaaatttaaagatggatacttttaacaaactgtaatggattataaggtctatagtTTTCACGTCGGGTTCACCA	1	ppt-MIR894,	ppt-MIR894	cataattcaaataatccaaaaaaaataaaccaaataccttccacctcaagCGTTTCACGTCGGGTTCACCaaatatgttgtattatgtgaagttttgattgagaatgcaccgagcacttggctatggaaggtaaaagaaaattgcaacaaaaagtcctaacaatccaataggattatagaaaatttataattaaacgttaacaatcataatcaaacaata	ppt-miR894	CGTTTCACGTCGGGTTCACC	3'	Diff	gp2b	..((((((((((((((..(((((((((((..((((((((((....))))))))))))))))).)))).........)))))))).......(((((((...((((......)))))))))))...))))))........	129	28.1	-27	0.7	182	127	176.5	65.5	33	40	180.144	109.654	206.953	63.4416	41.8716	37.8573	middle
111	101	ppt-MIR894-p3_2ss10GA19AG	TTTCACGTCAGGTTCACCG	19	contig_688554	-	562	645	aatggacaaaataaatgaaacttgaaaatggatatgcagaggaactagtcTTTCACGTCAGGTTCACCAattttgtatgcctaa	1	ppt-MIR894,	ppt-MIR894	cataattcaaataatccaaaaaaaataaaccaaataccttccacctcaagCGTTTCACGTCGGGTTCACCaaatatgttgtattatgtgaagttttgattgagaatgcaccgagcacttggctatggaaggtaaaagaaaattgcaacaaaaagtcctaacaatccaataggattatagaaaatttataattaaacgttaacaatcataatcaaacaata	ppt-MIR894-p3	TTTCACGTCGGGTTCACCa	3'	New	gp2b	...(((((((((...((.(((((((...((((...((((.....)).))..))))..)))))))))...)))))))...))...	78	34.5	-14.2	0.5	0	3	3.5	0	0	0	0	2.59024	4.10389	0	0	0	low
112	102	ppt-miR894_L+1R+1	TCGTTTCACGTCGGGTTCACCA	22	contig_850512	-	84	142	aaaacgtgaataggattcaaatcaaaaggttatgtgtTCGATTCACGTCGGGTTCACCA	1	ppt-MIR894,	ppt-MIR894	cataattcaaataatccaaaaaaaataaaccaaataccttccacctcaagCGTTTCACGTCGGGTTCACCaaatatgttgtattatgtgaagttttgattgagaatgcaccgagcacttggctatggaaggtaaaagaaaattgcaacaaaaagtcctaacaatccaataggattatagaaaatttataattaaacgttaacaatcataatcaaacaata	ppt-miR894	CGTTTCACGTCGGGTTCACC	3'	Diff	gp2b	...((((((((.(((..((((((....)))).))..))).)))))))).((.....)).	45	39	-15.4	0.7	26.5	27	0	10	0	2.5	26.2298	23.3122	0	9.68573	0	2.36608	middle
113	103	ppt-MIR902k-p3_2ss10AT17GA	TGCGGGTGATGCAAACAA	18	contig_3009425	+	883	992	tctgtttcatcaatgcctttcaggttttgtagttttttgttttcgtttttgtttttaaataagatttcatattgccgagaggaaggccttgTGCGGGTGATGCAAACAAt	1	ppt-MIR902k,	ppt-MIR902k	gttgattttgctgcatagattatctttctattcTATGTTGCAGATTCTTCATTTgccgctctgctgaatgatcatattgcgggtgaagcaaACGAAGGATCTGCAATATAAAccagaaaaggtaatcgtattttggccaata	ppt-MIR902k-p3	tgcgggtgaagcaaACGA	3'	New	gp2b	..(((((((((....((((((.(((..(((....((((((((..............))))))))....)))..)))))))))...((((.....)))))))).)))))..	106	35.5	-25.1	0.6	15	22	10	0	6	7	14.8471	18.9951	11.7254	0	7.61301	6.62502	middle
114	104	ppt-MIR903-p5_2ss16GC18CT	GGAACGAAGCGTGCGCCT	18	contig_180	-	3144	3198	cgtGGAACGAAGCGTGCGCCTttggcgggccctcgggcacctgcgcgctcgtggc	1	ppt-MIR903,	ppt-MIR903	gaacggcttcggctggtctgccgctcaacgcggggcactggtcagcgtggGCTACTTCGGCGGGACAAGAGCaggatgtagtttcctgccccccatgccgccgaggtggccgaggaacgaagcgtgcggccccctctcgggggggtcgtgggactcgtcccaactgcacgctcgggacgctggcgtattgagctcttcatccgacccgtctt	ppt-MIR903-p5	ggaacgaagcgtgcggcc	5'	New	gp2b	......(((.((((((((((...)))(((((....))).)).))))))))))...	46	74.5	-23.4	0.6	469	510	1202	237	109	111	464.218	440.341	1409.39	229.552	138.303	105.054	middle
115	105	ppt-MIR1030c-p5_1ss18TG	GCATCTGCATCTGCACCG	18	contig_4724543	-	805	885	tGCATCTGCATCTGCACCCcacacatgattttagcaacctaaatttatgagctcttgtttgtacaaagagtttgtgcatac	4	ppt-MIR1030c,ppt-MIR1030b,ppt-MIR1030h,ppt-MIR1030i,	ppt-MIR1030c	tactccttgctctgctgcatcgtaatgcaTCTGCATCTGCACCTGCACCAcgttgtgataggaacaaaactctgtcttgctgattccctgcacacatgcctttgttacccagcattctcgaatacggcgtcggtgctatcctcagataagtagagttgtcctcactaggttggtgaggtgcatatgcagaggcgttacattgcagctgcttaatattg	ppt-MIR1030c-p5	gcaTCTGCATCTGCACCT	5'	New	gp2b	(((....)))..(((((......(((((.(((((....))))).)))))(((((((((....)).))))))).)))))...	66	39.5	-19.1	0.6	0	11	11	0	0	0	0	9.49756	12.8979	0	0	0	middle
116	106	smo-MIR1103-p5_1ss3CA_1	GGATGGGTGACCTCCCGGG	19	contig_1051664	+	983	1010	atagGGATGGGTGACCTCCCGGGAagtc	1	smo-MIR1103,	smo-MIR1103	gcccatgaacAAGAGTGCACCCCCTTTCCAATcggttaaaggtcttaggatagttggagtttaagcgtccttgggtttgaatagtactgggctgggtgacctcccgggaagtccaaattcaggagcttacattaaccccaagtattccaaaacgcttaatcgatTGGAAAAAGGAGGTGCATTCTTGTtcataggccc	smo-MIR1103-p5	ggctgggtgacctcccggg	5'	New	gp2b	...((((.((....))))))........	17	60.7	-12.1	0.7	0	9.5	28	0	0	12	0	8.20244	32.8311	0	0	11.3572	middle
116	107	smo-MIR1103-p3_1ss3CA	GGATGGGTGACCTCCCGGGA	20	contig_1051664	+	983	1010	atagGGATGGGTGACCTCCCGGGAagtc	1	smo-MIR1103,	smo-MIR1103	gcccatgaacAAGAGTGCACCCCCTTTCCAATcggttaaaggtcttaggatagttggagtttaagcgtccttgggtttgaatagtactgggctgggtgacctcccgggaagtccaaattcaggagcttacattaaccccaagtattccaaaacgcttaatcgatTGGAAAAAGGAGGTGCATTCTTGTtcataggccc	smo-MIR1103-p3	ggctgggtgacctcccggga	3'	New	gp2b	...((((.((....))))))........	17	60.7	-12.1	0.7	35.5	66	178	32	8	46	35.138	56.9854	208.712	30.9944	10.1507	43.5359	middle
117	108	smo-MIR1103-p5_1ss11CA_1	TAGTACTGGGATGGGTGA	18	contig_1765549	+	1372	1497	agacaagttatgcgattttgataacaggtagttaagcgtgcttaacttggagTAGTACTGGGATGGGTGACCTCCtaggaagtcctagttttgtttccttctaatgtcgtcgggcctaatttggtg	1	smo-MIR1103,	smo-MIR1103	gcccatgaacAAGAGTGCACCCCCTTTCCAATcggttaaaggtcttaggatagttggagtttaagcgtccttgggtttgaatagtactgggctgggtgacctcccgggaagtccaaattcaggagcttacattaaccccaagtattccaaaacgcttaatcgatTGGAAAAAGGAGGTGCATTCTTGTtcataggccc	smo-MIR1103-p5	tagtactgggctgggtga	5'	New	gp2b	...(((((((.((.....(((..(((..(((..(((...((..((((.(((......((((((.((....))))))))....))).))))..))...)))))).)))..))).)).)))))))...	120	43.7	-35	0.6	20	25.5	67	0	0	0	19.7961	22.0171	78.5601	0	0	0	middle
117	109	smo-MIR1103-p3_1ss6CA	CTGGGATGGGTGACCTCC	18	contig_1765549	+	1372	1497	agacaagttatgcgattttgataacaggtagttaagcgtgcttaacttggagTAGTACTGGGATGGGTGACCTCCtaggaagtcctagttttgtttccttctaatgtcgtcgggcctaatttggtg	1	smo-MIR1103,	smo-MIR1103	gcccatgaacAAGAGTGCACCCCCTTTCCAATcggttaaaggtcttaggatagttggagtttaagcgtccttgggtttgaatagtactgggctgggtgacctcccgggaagtccaaattcaggagcttacattaaccccaagtattccaaaacgcttaatcgatTGGAAAAAGGAGGTGCATTCTTGTtcataggccc	smo-MIR1103-p3	ctgggctgggtgacctcc	3'	New	gp2b	...(((((((.((.....(((..(((..(((..(((...((..((((.(((......((((((.((....))))))))....))).))))..))...)))))).)))..))).)).)))))))...	120	43.7	-35	0.6	0	8.5	26	0	2.5	2.5	0	7.33902	30.486	0	3.17209	2.36608	middle
118	108	smo-MIR1103-p5_1ss11CA_1	TAGTACTGGGATGGGTGA	18	contig_3073313	+	425	453	TAGTACTGGGATGGGTGAcctcctaggaa	1	smo-MIR1103,	smo-MIR1103	gcccatgaacAAGAGTGCACCCCCTTTCCAATcggttaaaggtcttaggatagttggagtttaagcgtccttgggtttgaatagtactgggctgggtgacctcccgggaagtccaaattcaggagcttacattaaccccaagtattccaaaacgcttaatcgatTGGAAAAAGGAGGTGCATTCTTGTtcataggccc	smo-MIR1103-p5	tagtactgggctgggtga	5'	New	gp2b	.....((((((.((....))))))))...	21	51.7	-13.9	0.9	20	25.5	67	0	0	0	19.7961	22.0171	78.5601	0	0	0	middle
119	110	smo-MIR1103-p5_1ss3CA_2	GGATGGGTGACCTCCCGGGA	20	contig_2520830	+	1075	1105	aatgGGATGGGTGACCTCCCGGGAAGTCCCG	1	smo-MIR1103,	smo-MIR1103	gcccatgaacAAGAGTGCACCCCCTTTCCAATcggttaaaggtcttaggatagttggagtttaagcgtccttgggtttgaatagtactgggctgggtgacctcccgggaagtccaaattcaggagcttacattaaccccaagtattccaaaacgcttaatcgatTGGAAAAAGGAGGTGCATTCTTGTtcataggccc	smo-MIR1103-p5	ggctgggtgacctcccggga	5'	New	gp2b	...((((.((....))))))(((....))).	17	64.5	-15.2	0.8	35.5	66	178	32	8	46	35.138	56.9854	208.712	30.9944	10.1507	43.5359	middle
119	111	smo-MIR1103-p3_2ss17AC18AG	ACCTCCCGGGAAGTCCCG	18	contig_2520830	+	1075	1105	aatgGGATGGGTGACCTCCCGGGAAGTCCCG	1	smo-MIR1103,	smo-MIR1103	gcccatgaacAAGAGTGCACCCCCTTTCCAATcggttaaaggtcttaggatagttggagtttaagcgtccttgggtttgaatagtactgggctgggtgacctcccgggaagtccaaattcaggagcttacattaaccccaagtattccaaaacgcttaatcgatTGGAAAAAGGAGGTGCATTCTTGTtcataggccc	smo-MIR1103-p3	acctcccgggaagtccaa	3'	New	gp2b	...((((.((....))))))(((....))).	17	64.5	-15.2	0.8	53.5	312.5	612.5	48.5	8	30	52.9545	269.817	718.18	46.9758	10.1507	28.393	middle
120	112	smo-MIR1103-p5_1ss6CA_1	CTGGGATGGGTGACCTCCCGGGA	23	contig_374307	-	344	378	CTGGGATGAGTGACCTCCCGGGAAGTTCCcggtgt	1	smo-MIR1103,	smo-MIR1103	gcccatgaacAAGAGTGCACCCCCTTTCCAATcggttaaaggtcttaggatagttggagtttaagcgtccttgggtttgaatagtactgggctgggtgacctcccgggaagtccaaattcaggagcttacattaaccccaagtattccaaaacgcttaatcgatTGGAAAAAGGAGGTGCATTCTTGTtcataggccc	smo-MIR1103-p5	ctgggctgggtgacctcccggga	5'	New	gp2b	..(((........))).(((((.....)))))...	15	62.9	-10.4	0.5	0	0	0	0	0	14	0	0	0	0	0	13.25	middle
120	113	smo-MIR1103-p3_1ss20AC	GTGACCTCCCGGGAAGTCCC	20	contig_374307	-	344	378	CTGGGATGAGTGACCTCCCGGGAAGTTCCcggtgt	1	smo-MIR1103,	smo-MIR1103	gcccatgaacAAGAGTGCACCCCCTTTCCAATcggttaaaggtcttaggatagttggagtttaagcgtccttgggtttgaatagtactgggctgggtgacctcccgggaagtccaaattcaggagcttacattaaccccaagtattccaaaacgcttaatcgatTGGAAAAAGGAGGTGCATTCTTGTtcataggccc	smo-MIR1103-p3	gtgacctcccgggaagtcca	3'	New	gp2b	..(((........))).(((((.....)))))...	15	62.9	-10.4	0.5	0	10	11	0	0	0	0	8.63414	12.8979	0	0	0	middle
121	114	smo-MIR1103-p5_1ss8CA_2	TACTGGGATGGGTGACCTC	19	contig_1065307	+	298	431	TACTGGGATGGGTGACCTCttacaaagttctgctgacgatttcttttttacttttgtccaaaaattagatactccttgtgtcatttaaaaactacccactaatttaacataaataagattttgtaaaaccctaa	1	smo-MIR1103,	smo-MIR1103	gcccatgaacAAGAGTGCACCCCCTTTCCAATcggttaaaggtcttaggatagttggagtttaagcgtccttgggtttgaatagtactgggctgggtgacctcccgggaagtccaaattcaggagcttacattaaccccaagtattccaaaacgcttaatcgatTGGAAAAAGGAGGTGCATTCTTGTtcataggccc	smo-MIR1103-p5	tactgggctgggtgacctc	5'	New	gp2b	....(((..((....))..((((((((((.....(((((..............))))).........(((((.....)))))..................................))))))))))..)))...	127	31.3	-23.7	0.6	0	0	8	0	0	0	0	0	9.38031	0	0	0	low
122	115	smo-MIR1103-p5_1ss9CA_1	GTACTGGGATGGGTGACC	18	contig_1176862	+	912	995	ccagtaGTACTGGGATGGGTGACCctagaggaagtcccagtccttcacccctatgaggctgtgactagatccaccaactacttt	1	smo-MIR1103,	smo-MIR1103	gcccatgaacAAGAGTGCACCCCCTTTCCAATcggttaaaggtcttaggatagttggagtttaagcgtccttgggtttgaatagtactgggctgggtgacctcccgggaagtccaaattcaggagcttacattaaccccaagtattccaaaacgcttaatcgatTGGAAAAAGGAGGTGCATTCTTGTtcataggccc	smo-MIR1103-p5	gtactgggctgggtgacc	5'	New	gp2b	..((((((..(((...((....)).....(((((((.(((.(((.((......)))))))).))))...))).)))))))))..	80	52.4	-26.2	0.6	8.5	11	53	0	3	0	8.41333	9.49756	62.1446	0	3.80651	0	middle
123	115	smo-MIR1103-p5_1ss9CA_1	GTACTGGGATGGGTGACC	18	contig_1647081	+	134	162	taGTACTGGGATGGGTGACCtcctgggaa	1	smo-MIR1103,	smo-MIR1103	gcccatgaacAAGAGTGCACCCCCTTTCCAATcggttaaaggtcttaggatagttggagtttaagcgtccttgggtttgaatagtactgggctgggtgacctcccgggaagtccaaattcaggagcttacattaaccccaagtattccaaaacgcttaatcgatTGGAAAAAGGAGGTGCATTCTTGTtcataggccc	smo-MIR1103-p5	gtactgggctgggtgacc	5'	New	gp2b	.....(..(((.((....)))))..)...	21	55.2	-12.9	0.8	8.5	11	53	0	3	0	8.41333	9.49756	62.1446	0	3.80651	0	middle
124	116	smo-MIR1103-p5_1ss5CA	TGGGATGGGTGACCTCCCGGG	21	contig_1381883	-	3027	3071	TGGGATGGGTGACCTCCCAGGaagttctggtgcgtcgcctatatg	1	smo-MIR1103,	smo-MIR1103	gcccatgaacAAGAGTGCACCCCCTTTCCAATcggttaaaggtcttaggatagttggagtttaagcgtccttgggtttgaatagtactgggctgggtgacctcccgggaagtccaaattcaggagcttacattaaccccaagtattccaaaacgcttaatcgatTGGAAAAAGGAGGTGCATTCTTGTtcataggccc	smo-MIR1103-p5	tgggctgggtgacctcccggg	5'	New	gp2b	....(((((((((...(((((....)))))...)))))))))...	38	57.8	-18.3	0.7	0	0	2.5	0	0	3.5	0	0	2.93135	0	0	3.31251	low
125	117	smo-MIR1103-p5_1ss6CA_2	CTGGGATGGGTGACCTCCCGGGAA	24	contig_175911	-	1008	1051	CTGGGATGGGTGACCTCCTGGGAAgtcctggtgttgttgcctcc	1	smo-MIR1103,	smo-MIR1103	gcccatgaacAAGAGTGCACCCCCTTTCCAATcggttaaaggtcttaggatagttggagtttaagcgtccttgggtttgaatagtactgggctgggtgacctcccgggaagtccaaattcaggagcttacattaaccccaagtattccaaaacgcttaatcgatTGGAAAAAGGAGGTGCATTCTTGTtcataggccc	smo-MIR1103-p5	ctgggctgggtgacctcccgggaa	5'	New	gp2b	(..(((.((....)))))..)........(((......)))...	21	61.4	-14.9	0.6	0	0	0	0	0	14	0	0	0	0	0	13.25	middle
126	117	smo-MIR1103-p5_1ss6CA_2	CTGGGATGGGTGACCTCCCGGGAA	24	contig_669203	-	112	158	agcatagtaCTGGGATGGGTGACCTCCCGAGAAgtcccagtgtcgtt	1	smo-MIR1103,	smo-MIR1103	gcccatgaacAAGAGTGCACCCCCTTTCCAATcggttaaaggtcttaggatagttggagtttaagcgtccttgggtttgaatagtactgggctgggtgacctcccgggaagtccaaattcaggagcttacattaaccccaagtattccaaaacgcttaatcgatTGGAAAAAGGAGGTGCATTCTTGTtcataggccc	smo-MIR1103-p5	ctgggctgggtgacctcccgggaa	5'	New	gp2b	...((..((((((((((((......))).....)))))))))..)).	43	55.3	-17.2	0.7	0	0	0	0	0	14	0	0	0	0	0	13.25	middle
127	118	smo-MIR1103-p5_1ss9CA_2	GTACTGGGATGGGTGACCT	19	contig_1797199	+	149	174	GTACTGGGATGGGTGACCTaccaaaa	1	smo-MIR1103,	smo-MIR1103	gcccatgaacAAGAGTGCACCCCCTTTCCAATcggttaaaggtcttaggatagttggagtttaagcgtccttgggtttgaatagtactgggctgggtgacctcccgggaagtccaaattcaggagcttacattaaccccaagtattccaaaacgcttaatcgatTGGAAAAAGGAGGTGCATTCTTGTtcataggccc	smo-MIR1103-p5	gtactgggctgggtgacct	5'	New	gp2b	....(((...((....))..)))...	19	50	-8.5	0.7	8.5	11	53	0	3	0	8.41333	9.49756	62.1446	0	3.80651	0	middle
128	118	smo-MIR1103-p5_1ss9CA_2	GTACTGGGATGGGTGACCT	19	contig_9853	+	1609	1651	gtaGTACTGGGATGGGTGACCTcccaggaagtcccggtgcttc	1	smo-MIR1103,	smo-MIR1103	gcccatgaacAAGAGTGCACCCCCTTTCCAATcggttaaaggtcttaggatagttggagtttaagcgtccttgggtttgaatagtactgggctgggtgacctcccgggaagtccaaattcaggagcttacattaaccccaagtattccaaaacgcttaatcgatTGGAAAAAGGAGGTGCATTCTTGTtcataggccc	smo-MIR1103-p5	gtactgggctgggtgacct	5'	New	gp2b	..((((((((((((((......)))).....))))))))))..	39	60.5	-20.1	0.8	8.5	11	53	0	3	0	8.41333	9.49756	62.1446	0	3.80651	0	middle
129	119	smo-MIR1103-p5_2ss17AC18AG	ACCTCCCGGGAAGTCCCG	18	contig_2053527	-	116	147	gattgACCTCCCGGGAAGTCCTGgtgtcattt	1	smo-MIR1103,	smo-MIR1103	gcccatgaacAAGAGTGCACCCCCTTTCCAATcggttaaaggtcttaggatagttggagtttaagcgtccttgggtttgaatagtactgggctgggtgacctcccgggaagtccaaattcaggagcttacattaaccccaagtattccaaaacgcttaatcgatTGGAAAAAGGAGGTGCATTCTTGTtcataggccc	smo-MIR1103-p5	acctcccgggaagtccaa	5'	New	gp2b	...((((...(((((....))))).))))...	26	53.1	-10.9	0.6	53.5	312.5	612.5	48.5	8	30	52.9545	269.817	718.18	46.9758	10.1507	28.393	middle
130	120	smo-MIR1103-p3_2ss20AC21AG	GTGACCTCCCGGGAAGTCCCG	21	contig_2115565	-	1	141	ggttaacaggagaagatccctctccaccaccaatttgaacttttggtgtgacgacaaatcgtaacatggtatcagagccaggtagttaagcacacctgacctggagtagtactaggatgaGTGACCTCCTGGGAAGTCCCG	1	smo-MIR1103,	smo-MIR1103	gcccatgaacAAGAGTGCACCCCCTTTCCAATcggttaaaggtcttaggatagttggagtttaagcgtccttgggtttgaatagtactgggctgggtgacctcccgggaagtccaaattcaggagcttacattaaccccaagtattccaaaacgcttaatcgatTGGAAAAAGGAGGTGCATTCTTGTtcataggccc	smo-MIR1103-p3	gtgacctcccgggaagtccaa	3'	New	gp2b	((((..((((((....((.((((((..((((((.........))))))..((((....))))....((((((.....((((((((..........)).))))))....))))))))).))).)).))))))..))...)).	140	48.9	-39	0.6	3	11.5	12.5	0	0	0	2.96941	9.92927	14.6567	0	0	0	middle
131	121	smo-MIR1103-p5_1ss8CA_1	TACTGGGATGGGTGACCT	18	contig_2473061	+	7	145	aTACTGGGATGGGTGACCTaacaaaatcccaggtacaagtgtgagacagtttaccaagctaaacgggcttgattgtgcaaaaaagtctatggtcaagcatgcttgagccatggtaatattgggatgggtgacctagcaa	2	smo-MIR1103,smo-MIR1103,	smo-MIR1103	gcccatgaacAAGAGTGCACCCCCTTTCCAATcggttaaaggtcttaggatagttggagtttaagcgtccttgggtttgaatagtactgggctgggtgacctcccgggaagtccaaattcaggagcttacattaaccccaagtattccaaaacgcttaatcgatTGGAAAAAGGAGGTGCATTCTTGTtcataggccc	smo-MIR1103-p5	tactgggctgggtgacct	5'	New	gp2b	...(((((..((....))..((...(((((((((((((..(((((....)))))((((((.....)))))).))))))........(((((((((((....))))).)))))).....)))))))..))..)))))...	133	44.6	-46	0.7	0	0	8	0	0	0	0	0	9.38031	0	0	0	low
132	122	smo-MIR1103-p3_1ss11CA	TAGTACTGGGATGGGTGACC	20	contig_43111	+	1106	1151	ttaagtgcacctaacctagagTAGTACTGGGATGGGTGACCtcccg	1	smo-MIR1103,	smo-MIR1103	gcccatgaacAAGAGTGCACCCCCTTTCCAATcggttaaaggtcttaggatagttggagtttaagcgtccttgggtttgaatagtactgggctgggtgacctcccgggaagtccaaattcaggagcttacattaaccccaagtattccaaaacgcttaatcgatTGGAAAAAGGAGGTGCATTCTTGTtcataggccc	smo-MIR1103-p3	tagtactgggctgggtgacc	3'	New	gp2b	...((((((((((...))).)).)))))((((.((....)))))).	25	52.2	-16.9	0.7	18	34	58.5	2.5	5	0	17.8165	29.3561	68.5935	2.42143	6.34418	0	middle
133	123	smo-MIR1103-p5_1ss7CA	ACTGGGATGGGTGACCTCCC	20	contig_654746	+	2282	2321	ggagtaatACTGGGATGGGTGACCTCCCgagaagtgccgg	1	smo-MIR1103,	smo-MIR1103	gcccatgaacAAGAGTGCACCCCCTTTCCAATcggttaaaggtcttaggatagttggagtttaagcgtccttgggtttgaatagtactgggctgggtgacctcccgggaagtccaaattcaggagcttacattaaccccaagtattccaaaacgcttaatcgatTGGAAAAAGGAGGTGCATTCTTGTtcataggccc	smo-MIR1103-p5	actgggctgggtgacctccc	5'	New	gp2b	((........(((((.((....))))))).......))..	19	60	-13.7	0.6	3	20	34.5	0	0	0	2.96941	17.2683	40.4526	0	0	0	middle
134	124	smo-MIR1103-p3_1ss5CA	TGGGATGGGTGACCTCCCGGGA	22	contig_843759	-	85	151	gcggggaactccacggtcggtcacacattcttgagtTGGGATGGGCGACCTCCCGGGAggtctcaat	1	smo-MIR1103,	smo-MIR1103	gcccatgaacAAGAGTGCACCCCCTTTCCAATcggttaaaggtcttaggatagttggagtttaagcgtccttgggtttgaatagtactgggctgggtgacctcccgggaagtccaaattcaggagcttacattaaccccaagtattccaaaacgcttaatcgatTGGAAAAAGGAGGTGCATTCTTGTtcataggccc	smo-MIR1103-p3	tgggctgggtgacctcccggga	3'	New	gp2b	...((((.((((.(((..((((...((((((......))))))...))))..))))))).))))...	61	61.2	-29.9	0.7	0	2.5	0	0	0	3	0	2.15854	0	0	0	2.8393	low
135	125	smo-MIR1103-p5_1ss11CA_2	TAGTACTGGGATGGGTGACCT	21	contig_893751	+	24	104	gagtcaTAGTACTGGGATGGGTGACCTcctgggaagtcctagtgcttcacccatatgaccatcacctagatgcaatgagag	1	smo-MIR1103,	smo-MIR1103	gcccatgaacAAGAGTGCACCCCCTTTCCAATcggttaaaggtcttaggatagttggagtttaagcgtccttgggtttgaatagtactgggctgggtgacctcccgggaagtccaaattcaggagcttacattaaccccaagtattccaaaacgcttaatcgatTGGAAAAAGGAGGTGCATTCTTGTtcataggccc	smo-MIR1103-p5	tagtactgggctgggtgacct	5'	New	gp2b	...((((.((((((((((((((((....(((((....)))))....))))))))..........))))).))).))))...	75	50.6	-28.3	0.7	20	25.5	67	0	0	0	19.7961	22.0171	78.5601	0	0	0	middle
136	126	pta-miR1314_2ss3GA22AG	TCAGCCTTGAATGTTAGGAGAG	22	contig_1251319	+	461	648	caagttccagtgtgattaagcgttctattctgcgtacatgacctgttaatcggggaagaaagttctctaatctttgaggttgacaaaaacatatttttgtttgaatgTCAGCCTTGAATGTTAGGAGAGgatttttccttgactaatcatgccatgtaaagcgaatttacgatgactctgagggtttt	1	pta-MIR1314,	pta-MIR1314	aattccaattccaattgataacatgttagttagctgaagagattcttcaacattagaggccaatatagaataatattcttattcttaaTCGGCCTTGAATGTTAGGAGAAcgttttcctctacctaagcatgctatctcaaaggagtttaaggagtgg	pta-miR1314	TCGGCCTTGAATGTTAGGAGAA	3'	Diff	gp2b	.(((..((((.((.((....(((...((((.((.((((((....((((.((..(((((((..((((((((..((..(((((((((.(((((......)))))...)))))))))..))..)))).))))..)))))))..)).)))).....))))))..))))))..))))).)).))).)..))).	186	37.8	-59.7	0.8	3.5	8.5	5.5	0	0	0	3.46431	7.33902	6.44896	0	0	0	low
137	126	pta-miR1314_2ss3GA22AG	TCAGCCTTGAATGTTAGGAGAG	22	contig_1555333	-	52	142	tatacagacagcggcaaaataggcagactatctttgactggtcggcattctatccttagcttcttctagTCAGCCTTGGATGTTAGGAGAG	1	pta-MIR1314,	pta-MIR1314	aattccaattccaattgataacatgttagttagctgaagagattcttcaacattagaggccaatatagaataatattcttattcttaaTCGGCCTTGAATGTTAGGAGAAcgttttcctctacctaagcatgctatctcaaaggagtttaaggagtgg	pta-miR1314	TCGGCCTTGAATGTTAGGAGAA	3'	Diff	gp2b	...(((..(((.(((...((((.....))))...(((((((..(((............)))....)))))))))))))..)))........	80	45.1	-20.6	0.5	3.5	8.5	5.5	0	0	0	3.46431	7.33902	6.44896	0	0	0	low
138	127	pta-miR1314_R-2_1ss17GA	TCGGCCTTGAATGTTAAGAG	20	contig_3245888	-	448	527	tggtccagactaacgaaacatgtggacatcactaattttctctcttcatttggaggttcgTTGGCCTTGAATGTTAAGAG	1	pta-MIR1314,	pta-MIR1314	aattccaattccaattgataacatgttagttagctgaagagattcttcaacattagaggccaatatagaataatattcttattcttaaTCGGCCTTGAATGTTAGGAGAAcgttttcctctacctaagcatgctatctcaaaggagtttaaggagtgg	pta-miR1314	TCGGCCTTGAATGTTAGGAGAA	3'	Diff	gp2b	..(((((...............)))))............((((...((((..(.(((......))))..))))...))))	41	41.2	-16	0.5	6.5	3	8.5	3	0	0	6.43373	2.59024	9.96658	2.90572	0	0	low
139	127	pta-miR1314_R-2_1ss17GA	TCGGCCTTGAATGTTAAGAG	20	contig_825375	+	1798	1924	aaattcttcgccaccacaggagtttctTCGGCCTTGGATGTTAAGAGggattctagagggagtgttttgattcctgctaggattacccaacccagccctctcggccctagacacttctcgagaaaca	1	pta-MIR1314,	pta-MIR1314	aattccaattccaattgataacatgttagttagctgaagagattcttcaacattagaggccaatatagaataatattcttattcttaaTCGGCCTTGAATGTTAGGAGAAcgttttcctctacctaagcatgctatctcaaaggagtttaaggagtgg	pta-miR1314	TCGGCCTTGAATGTTAGGAGAA	5'	Diff	gp2b	...(((.(((.......((((((.(((..((((..((..(((....((((((((((..(((((......)))))..)))))))..))).....)))..))..))))..))).))))))))))))...	121	49.6	-37.1	0.6	6.5	3	8.5	3	0	0	6.43373	2.59024	9.96658	2.90572	0	0	low
140	128	pta-MIR1314-p5_2ss3GA17GA	TCAGCCTTGAATGTTAAGAG	20	contig_349422	-	634	711	TCAGCCTTGGATGTTAAGAGagttggatcttccatcacctgatgggatttcttatttccttccccttagtcatctttc	1	pta-MIR1314,	pta-MIR1314	aattccaattccaattgataacatgttagttagctgaagagattcttcaacattagaggccaatatagaataatattcttattcttaaTCGGCCTTGAATGTTAGGAGAAcgttttcctctacctaagcatgctatctcaaaggagtttaaggagtgg	pta-MIR1314-p5	TCGGCCTTGAATGTTAGGAG	5'	New	gp2b	........((((((((((.(((..(((..(((((((....)))))))..)))...)))......))))).)))))...	67	42.3	-18.3	0.6	2.5	0	0	0	5	0	2.47451	0	0	0	6.34418	0	low
141	129	pta-MIR1314-p3_2ss3GA17GA	TCAGCCTTGAATGTTAAGAG	20	contig_4444667	-	205	238	gtagctcaTCAGCCTTGATTGTTAAGAGagcaca	1	pta-MIR1314,	pta-MIR1314	aattccaattccaattgataacatgttagttagctgaagagattcttcaacattagaggccaatatagaataatattcttattcttaaTCGGCCTTGAATGTTAGGAGAAcgttttcctctacctaagcatgctatctcaaaggagtttaaggagtgg	pta-MIR1314-p3	TCGGCCTTGAATGTTAGGAG	3'	New	gp2b	((.((((.(((((.......)))..)))))))).	33	44.1	-5.5	0.4	2.5	0	0	0	5	0	2.47451	0	0	0	6.34418	0	low
142	130	mtr-MIR1510b-p3_2ss8TC17CG	TACCCGCCCCTCCCATGCC	19	contig_2341456	+	564	637	tattaatgatattgtcaacatggctccatggTACCCGCCCCTCCCATTCCacccaagcctccatatcattgtct	1	mtr-MIR1510b,	mtr-MIR1510b	acatctagttagtcataccgataggcgagagagatttgctactgcaattgttgttttacccgctcctcccatcCCATGGATCCCTACCATGTGGactccatcatcatcagatccaatcttgtgataatagagtcACATGGTCGGTATCCCTGGAAtggaggatcaggtaaaacaacttttgctttagaaatgattcatttctcatcaccttcatcaggtttatgatttctgtctgt	mtr-MIR1510b-p3	tacccgctcctcccatcCC	3'	New	gp2b	...(((((((((((....)).((((...(((.................)))....))))...)))))))))...	68	47.3	-10.7	0.3	15	26	24	34	20	21	14.8471	22.4488	28.1409	32.9315	25.3767	19.8751	middle
143	131	gma-MIR1536-p5_1ss14TG	TATTTAGATGATAGATTA	18	contig_224	-	1840	1948	TATTTAGATGATAGATTAgatgatagataattctgaannnnccttgtttacgaagaagggagctataagtaATAAATAAATGCAACTCTTAnnntcattgagagtttga	2	gma-MIR1536,vvi-MIR3631c,	gma-MIR1536	gagaggatagcaatattgtctctgctttaatttatcaccacattccttctcatctcaagagatgctttgcttattgtgccatattcccaagagatttacatatgtttgtaagagagcttttaattttgttgtgaatggctgaaaattttatacaatgccctcatgagagtatttagatgatatattatgtgggtatgttgttaaacaatcAAGCAGAGACAAATGTGTTTAgtcatgcatg	gma-MIR1536-p5	tatttagatgatatatta	5'	New	gp2b	((((((....((((.(((((...........))))).....((((.((....)).))))...))))......)))))).....((((((((.......))))))))...	78	26.6	-15.9	0.5	0	0	0	0	0	5	0	0	0	0	0	4.73216	low
143	132	vvi-MIR3631c-p3_2ss15AC17TC	ATAAATAAATGCAACTCTTA	20	contig_224	-	1840	1948	TATTTAGATGATAGATTAgatgatagataattctgaannnnccttgtttacgaagaagggagctataagtaATAAATAAATGCAACTCTTAnnntcattgagagtttga	2	gma-MIR1536,vvi-MIR3631c,	vvi-MIR3631c	tagataaataaatgcaaattttagtaagtacttttcttaataagttctaataaatataaatttaggtggtgttttttttttgtctgaatataaaagactaaaatatttgactttttatatttagttaaaagtaaCATGTTGACATCATCCAATATAactaaactcaacatattaataataagttcactttaatcatattggatgatatcaacaagttacttttaactgaataaaaaatactaaaatattttgattttttctaattcaatcaaaaaacaaataccaccttaattaaccatttaagatgtattttcttatttttatttattttttta	vvi-MIR3631c-p3	ataaataaatgcaaatttta	3'	New	gp2b	((((((....((((.(((((...........))))).....((((.((....)).))))...))))......)))))).....((((((((.......))))))))...	78	26.6	-15.9	0.5	5.5	0	0	0	0	3	5.44392	0	0	0	0	2.8393	low
144	133	osa-MIR2101-p5_1ss2AT	ATGTTTGGCACTCTGAAC	18	contig_1011145	+	1106	1181	ATGTTTGGCACTCTGAACtagacaatgatgttttctttcaaaaagttacacattgtctctaaattggcatgcttgg	1	osa-MIR2101,	osa-MIR2101	tcttatctcACATGTTTACAAGTTAAAATGTggagcagagggtatacaacccaaacaagtttggcactctgaacgATTTAACTCAAGTGAGCATTGTgcgaggccat	osa-MIR2101-p5	aagtttggcactctgaac	5'	New	gp2b	......((((..(..(...((((((((.(((...((((...))))..))))))))))).....)..)..))))...	67	35.5	-16.4	0.6	0	6.5	0	8	7.5	38	0	5.61219	0	7.74859	9.51627	35.9644	middle
145	134	osa-MIR2101-p3_2ss1AT18GA	TGTTTGGCACTCTGAACA	18	contig_1531319	-	176	217	tcatgtttagttgtcatataaTGTTTGGCACTCTGAATAgac	1	osa-MIR2101,	osa-MIR2101	tcttatctcACATGTTTACAAGTTAAAATGTggagcagagggtatacaacccaaacaagtttggcactctgaacgATTTAACTCAAGTGAGCATTGTgcgaggccat	osa-MIR2101-p3	agtttggcactctgaacg	3'	New	gp2b	((.(((((((.(((((.........)))))..))))))))).	41	33.3	-9.2	0.7	136	230.5	13.5	158.5	193	1017.5	134.613	199.017	15.8293	153.519	244.885	962.995	middle
146	134	osa-MIR2101-p3_2ss1AT18GA	TGTTTGGCACTCTGAACA	18	contig_224	-	763	804	tcgtgtttagttgccatagtaTGTTTGGCACTCTGAACAgac	1	osa-MIR2101,	osa-MIR2101	tcttatctcACATGTTTACAAGTTAAAATGTggagcagagggtatacaacccaaacaagtttggcactctgaacgATTTAACTCAAGTGAGCATTGTgcgaggccat	osa-MIR2101-p3	agtttggcactctgaacg	3'	New	gp2b	((.(((((((.(((((.........)))))..))))))))).	41	42.9	-13.8	0.8	136	230.5	13.5	158.5	193	1017.5	134.613	199.017	15.8293	153.519	244.885	962.995	middle
147	135	ptc-MIR2111a-p5_2ss9AT21GT	TCTTCCTCTCTGACAATGCAT	21	contig_1627855	+	787	848	ctagtTCTTCCTCTCCGACAATGCATgcaacttcttcccactcccaaccaaagaagaatgag	1	ptc-MIR2111a,	ptc-MIR2111a	cttgatattgggtcaggacttggTAATCTGCATCCTGAGGTTTGgatcatcatgtagtttgatctagtccttgggttgcagattacctcttcctcactgacaatgcagag	ptc-MIR2111a-p5	tcttcctcactgacaatgcag	5'	New	gp2b	..........(((........((....))..((((((...............)))))).)))	52	46.8	-3.7	0.1	0	5	0	8	0	0	0	4.31707	0	7.74859	0	0	low
148	136	mtr-miR2111a-5p_1ss21AG	TAATCTGCATCCTGAGGTTTG	21	contig_1662452	+	968	1079	cttgttcagggattttgagtagaTAATCTGCATCCTGAGGTTTGaggattcataaacttaaaaatcctctgacctctgtatgcagattatcctctccttctccatggattaa	44	mtr-MIR2111j,mtr-MIR2111k,mtr-MIR2111d,mtr-MIR2111f,mtr-MIR2111e,mtr-MIR2111a,mtr-MIR2111b,mtr-MIR2111i,mtr-MIR2111c,mtr-MIR2111n,mtr-MIR2111h,mtr-MIR2111o,mtr-MIR2111m,mtr-MIR2111g,gma-MIR2111b,gma-MIR2111e,gma-MIR2111d,gma-MIR2111c,gma-MIR2111a,gma-MIR2111f,ptc-MIR2111a,ptc-MIR2111b,ath-MIR2111b,ath-MIR2111a,mdm-MIR2111b,mdm-MIR2111a,aly-MIR2111b,aly-MIR2111a,aly-MIR2111c,ppe-MIR2111c,ppe-MIR21…	mtr-MIR2111g	atattgggtgaggatgggaTAATCTGCATCCTGAGGTTTAagacaatatttgcgtaatttccaaaaaataaataaattgcgtaatcgtttctaAGCCTCGGAGTGCGGATTATCttttcctatcaccaatgc	mtr-miR2111a-5p	TAATCTGCATCCTGAGGTTTA	5'	Diff	gp2b	...(((((.(((....(((..((((((((((((...(((((..(((((((..((....))..)))))))..)))))...))))))))))))..)))....))).)))))...	106	38.4	-46.3	1.1	13	77	0	122	46	103	12.8675	66.4829	0	118.166	58.3664	97.4825	middle
149	137	ata-MIR2118b-p3_2ss8CT18AT	ATTAATTTATAAATCATT	18	contig_1242042	+	1819	1876	ctaaatttggtaatttatcacctgataatgttaatattgaATTAATTTATAAATCATT	1	ata-MIR2118b,	ata-MIR2118b	gtttggtgttTTCCCGATGCCTCCCATTCCTAtggttcttgagcactccttcctcttccctttcgcttgctcaatagattaattcataaatcataaatatgtgtgcacatacttagataatctgagatctagaatgctagttgagaagaggaagaaaagagatcccgagagcagtGGGAATGGGAACATGGAGGAAaccctaaag	ata-MIR2118b-p3	attaattcataaatcata	3'	New	gp2b	...((((..(((..(((((....)))))......)))..))))...............	40	17.2	-5.9	0.6	0	0	0	0	6.5	0	0	0	0	0	8.24743	0	low
150	138	ata-MIR2118b-p5_2ss8CT18AT	ATTAATTTATAAATCATT	18	contig_2719392	+	343	461	ATTAATTTATAAATCATTcctcaaggaaggaggatgagggggaggaaattaaagagtgtaaattgcaattttgtatgcaaaaaagtatatgttttaatgaagaactctggtttgtgtat	1	ata-MIR2118b,	ata-MIR2118b	gtttggtgttTTCCCGATGCCTCCCATTCCTAtggttcttgagcactccttcctcttccctttcgcttgctcaatagattaattcataaatcataaatatgtgtgcacatacttagataatctgagatctagaatgctagttgagaagaggaagaaaagagatcccgagagcagtGGGAATGGGAACATGGAGGAAaccctaaag	ata-MIR2118b-p5	attaattcataaatcata	5'	New	gp2b	.......((((((((..(((((.......)))))...((((......(((((((..((((..(((((........))))).....))))..)))))))......))))))))))))...	109	30.3	-23.5	0.7	0	0	0	0	6.5	0	0	0	0	0	8.24743	0	low
151	139	osa-MIR2275a-p3_1ss10TG	CTTTGGCAGGTGAATTTG	18	contig_659758	-	640	676	tcctcactgccatcttcatCTTTGGCAGGTGAATTTT	1	osa-MIR2275a,	osa-MIR2275a	agcttagctaggcatcacaaaccataatctttggcagttgaatttgaggtttggatgggaccaaatcttactgcagacttgcagattaacgcaagaTTTGGTTTCCTCCAATATCTCAtgttcagttgtcagacagtgaataatggtgcaattagtgagct	osa-MIR2275a-p3	ctttggcagttgaatttg	3'	New	gp2b	...(((((((((..........)))))).))).....	29	43.2	-11	0.7	0	0	0	0	16	0	0	0	0	0	20.3014	0	middle
152	140	mtr-MIR2592bi-p5_2ss16GA19AT	ATTCCCATTGTCCCTATCT	19	contig_1102694	-	960	1039	ctctaATTCCCATTTTCCCTATCTtaaccttatcttaatcccatattccctaatctacccctaatcgttttgaattaccc	1	mtr-MIR2592bi,	mtr-MIR2592bi	ccaatattcgacccgcattcccattgtccctgtcaaaagattaaattcttgttagtccggtttaaatgaaggtattgaagtgtcaaggaatgaacctcattcttttcacacttaaataccgtcatttaaaccaaacctaacaagaatttaatcttttgaaTGGAACATTGGGAATGCCGGTcgtatattgg	mtr-MIR2592bi-p5	attcccattgtccctgtca	5'	New	gp2b	...((((((..............................................................))))))...	74	36.2	0.883	0	0	0	6	0	0	0	0	0	7.03523	0	0	0	low
153	141	mtr-MIR2592bi-p3_1ss16GA	ATTCCCATTGTCCCTATC	18	contig_1485669	-	115	139	ctagatATTCCCATTGTCCCTATCa	1	mtr-MIR2592bi,	mtr-MIR2592bi	ccaatattcgacccgcattcccattgtccctgtcaaaagattaaattcttgttagtccggtttaaatgaaggtattgaagtgtcaaggaatgaacctcattcttttcacacttaaataccgtcatttaaaccaaacctaacaagaatttaatcttttgaaTGGAACATTGGGAATGCCGGTcgtatattgg	mtr-MIR2592bi-p3	attcccattgtccctgtc	3'	New	gp2b	...((((.......)))).......	15	40	-1	0.1	0	0	18	0	0	0	0	0	21.1057	0	0	0	middle
154	142	mtr-MIR2592bi-p3_2ss9TC17GA	CATTCCCACTGTCCCTATC	19	contig_180	-	1294	1402	cgcgggtaaacggcgggagtaactatgactctcttaaggtagccaaatgcctcgtcatctaattagtgacgcgcatgaatggattaacgaGATTCCCACTGTCCCTATC	1	mtr-MIR2592bi,	mtr-MIR2592bi	ccaatattcgacccgcattcccattgtccctgtcaaaagattaaattcttgttagtccggtttaaatgaaggtattgaagtgtcaaggaatgaacctcattcttttcacacttaaataccgtcatttaaaccaaacctaacaagaatttaatcttttgaaTGGAACATTGGGAATGCCGGTcgtatattgg	mtr-MIR2592bi-p3	cattcccattgtccctgtc	3'	New	gp2b	...(((...((((.(((((..........((((((((..((.....((((..((((((.......)))))).))))...))..)))).))))))))).)))))))....	102	48.6	-29.3	0.6	9.5	9.5	32.5	0	0	0	9.40314	8.20244	38.1075	0	0	0	middle
155	142	mtr-MIR2592bi-p3_2ss9TC17GA	CATTCCCACTGTCCCTATC	19	contig_881235	-	903	949	ttagggtaggggcaaaaaactagtCATTCCCACTGTCCCTATCcaca	2	mtr-MIR2592bi,mtr-MIR2592bj,	mtr-MIR2592bi	ccaatattcgacccgcattcccattgtccctgtcaaaagattaaattcttgttagtccggtttaaatgaaggtattgaagtgtcaaggaatgaacctcattcttttcacacttaaataccgtcatttaaaccaaacctaacaagaatttaatcttttgaaTGGAACATTGGGAATGCCGGTcgtatattgg	mtr-MIR2592bi-p3	cattcccattgtccctgtc	3'	New	gp2b	...(((((((((((...................)))))))))))...	41	46.8	-17.3	0.8	9.5	9.5	32.5	0	0	0	9.40314	8.20244	38.1075	0	0	0	middle
156	143	mtr-MIR2592bj-p5_2ss13TC17GA	AATTCCCACTGTCCCTATC	19	contig_225285	-	2926	3014	AATTCCCACTGCCCCTATCccagatttgtgcaaggccatcattggtattttggattcgcgcttggttggagacaagggaggggacaagt	1	mtr-MIR2592bj,	mtr-MIR2592bj	ccaatatttgaccggaattcccactgttcctgtcaaaagattaaattcttgttaggctgatttaaatgaaggtattgaagtgtcaaggaatggacctcattcttttcacatttgaataccatcatttaatcccaacctaacaagaatttaatcttttgaaTGGAACATTGGGAATGCCGGTcgaatattgg	mtr-MIR2592bj-p5	aattcccactgttcctgtc	5'	New	gp2b	...((((.((.(((...((((((....((((....(((..((....))..)))....))))....)))).))...))))))))).....	81	50.6	-26.1	0.6	0	0	6	0	0	0	0	0	7.03523	0	0	0	low
157	144	mtr-MIR2603-p5_2ss9AC17AC	GTCCCTGCCCTTTGTACA	18	contig_180	-	4964	5117	cattgcaattattgatcttcaacgaggaattcctagtaagcgcgagtcatcagctcgcgttgactacGTCCCTGCCCTTTGTACAcaccgcccgtcgctcctaccgattgaatgatccggtgaagtgttcggatcGCGACGACGGCGGTGGTTT	2	mtr-MIR2603,osa-MIR156k,	mtr-MIR2603	ttggtccctgcacttttttgTTTGGTATTGGTCCCTGCACTTtgtaaaaatattggtattggttcctctgttaactttctgttaaaaaaaaaacacaaaaccaacggagtgcggcccaatcatttcacgcccacgtggcaccaatatcaatatttttacaaattgcagggacaaataccaatattttacaaagtgcagggcccaataccaatagttttgggttttttttttacagaaagttaatagagggaccaataccaatatttttacaaagtgcaaggaccaattccaaacaaaaaaaagtgtagggaccaat	mtr-MIR2603-p5	GTCCCTGCACTTtgtaaa	5'	New	gp2b	...(((((...(((.....)))...(((.....((((.(((((((((.....))))))))).))))..))).......)))))..(((((((((((((...............(((((((........)))))))))))))..)))))))....	80	53.2	-53	0.6	153	132	130	19	10	50	151.44	113.971	152.43	18.4029	12.6884	47.3216	middle
157	145	osa-MIR156k-p3_2ss15CG17CT	GCGACGACGGCGGTGGTTT	19	contig_180	-	4964	5117	cattgcaattattgatcttcaacgaggaattcctagtaagcgcgagtcatcagctcgcgttgactacGTCCCTGCCCTTTGTACAcaccgcccgtcgctcctaccgattgaatgatccggtgaagtgttcggatcGCGACGACGGCGGTGGTTT	2	mtr-MIR2603,osa-MIR156k,	osa-MIR156k	ttgagagtgaTGACAGAAGAGAGAGAGCACAacccggcagcagcgacgacggcggtcgcttctgccagggccgtgtgctctctgatctatctgtcattgccgtcca	osa-MIR156k-p3	gcgacgacggcggtcgctt	3'	New	gp2b	...(((((...(((.....)))...(((.....((((.(((((((((.....))))))))).))))..))).......)))))..(((((((((((((...............(((((((........)))))))))))))..)))))))....	80	53.2	-53	0.6	53	91	123	101	75	192	52.4596	78.5707	144.222	97.8259	95.1627	181.715	middle
158	146	mtr-MIR2617b-p5_2ss4TC18AT	ATACTTTATATTTAATTT	18	contig_224	-	2246	2375	aATACTTTATATTTAATTTaagtaataaattctacttttttatatttttattataaattcttttttttaatttatattttaaattaaaagtaataatatatattcaattatatgacttttaaatatactt	2	mtr-MIR2617b,mtr-MIR2617c,	mtr-MIR2617b	aTGTAGTGTAGCATGCCCGTTtggtgaattactctgatgaatattttatatttaattacttttgggtaacggggtgttacattata	mtr-MIR2617b-p5	atattttatatttaatta	5'	New	gp2b	.......(((((((((...(((((........)))))..((((((..((..((((.(((....(((((((((((.....)))))))))))....))).))))...))..))))))...)))))))))...	120	7.7	-15.4	1.5	0	0	0	0	0	12	0	0	0	0	0	11.3572	middle
159	147	mtr-MIR2630s-p5_2ss5AG17TC	GAATGTGAATCAATTTCA	18	contig_1435353	+	2488	2516	agaGAATGTGAATCAATTTCAaattcatt	1	mtr-MIR2630s,	mtr-MIR2630s	ccctgcaaatatagaatattTGGTTTTGGTCCTTGGTATTTtgttttaatccttgtaaaatcatttcatattaaaattggtccctataatattcattttagttctcattttgagggactaaaattaaatattctacatattacaaggaccaaatcgaatatgaatcaattttacaaggactaaaacaaaacaccaaggaccaaaacccaattttttatatttgcaggga	mtr-MIR2630s-p5	gaatatgaatcaatttta	5'	New	gp2b	...((((.((((.....)))).))))...	23	24.1	-5.3	0.8	0	0	0	0	0	6	0	0	0	0	0	5.67859	low
160	147	mtr-MIR2630s-p5_2ss5AG17TC	GAATGTGAATCAATTTCA	18	contig_40	+	6360	6394	tcttggaGAATGTGAATCAATTTCAaaatccattt	1	mtr-MIR2630s,	mtr-MIR2630s	ccctgcaaatatagaatattTGGTTTTGGTCCTTGGTATTTtgttttaatccttgtaaaatcatttcatattaaaattggtccctataatattcattttagttctcattttgagggactaaaattaaatattctacatattacaaggaccaaatcgaatatgaatcaattttacaaggactaaaacaaaacaccaaggaccaaaacccaattttttatatttgcaggga	mtr-MIR2630s-p5	gaatatgaatcaatttta	5'	New	gp2b	...((((.....((((.....))))...))))...	29	28.6	-6.5	0.7	0	0	0	0	0	6	0	0	0	0	0	5.67859	low
161	148	mtr-MIR2638a-p3_2ss6CA18AC	TGTCCATGCAAATATATCT	19	contig_1842427	+	897	949	aacaaggaatatctgtgtaTGTCCATGCAAATATATCTacgtattctcttaag	1	mtr-MIR2638a,	mtr-MIR2638a	gttactaatcattccaatctgccactgcaaatattaatcatttgacttttggtcctaattagtttttttttgctgagatgggctatcattagcgacgtggtgcctatgtggcaagtgatgattggacgaggtggttggcttaaataggtcttttgtccctgcaaatatatatcatttgaattttcatccctaaagttactaatcagatgtaattaggactatttttcaaATGATTAATATTTGCAGTGGCagattggaaggattagtaa	mtr-MIR2638a-p3	tgtccctgcaaatatatat	3'	New	gp2b	...(((((((((....((((((........))))))....)))))).)))...	47	32.1	-7	0.4	0	0	0	4	21.5	10	0	0	0	3.87429	27.28	9.46432	middle
162	149	mtr-MIR2638a-p5_2ss6CA18AC	TGTCCATGCAAATATATCT	19	contig_2234924	+	695	821	TGTCCATGCAAATATATCTtggaactcaacaagaagcactataaatgattatatttcttcctctataataataacatgaagttgtaaaagtttaggatgctcctttgtgccaatatttattgcaatg	1	mtr-MIR2638a,	mtr-MIR2638a	gttactaatcattccaatctgccactgcaaatattaatcatttgacttttggtcctaattagtttttttttgctgagatgggctatcattagcgacgtggtgcctatgtggcaagtgatgattggacgaggtggttggcttaaataggtcttttgtccctgcaaatatatatcatttgaattttcatccctaaagttactaatcagatgtaattaggactatttttcaaATGATTAATATTTGCAGTGGCagattggaaggattagtaa	mtr-MIR2638a-p5	tgtccctgcaaatatatat	5'	New	gp2b	......(((.((((.((.((((....((..(((.((((...(((((..(((((((((....................)))).)))))..)))))...)))).)))))..)))).)).)))))))...	118	29.9	-19.6	0.5	0	0	0	4	21.5	10	0	0	0	3.87429	27.28	9.46432	middle
163	150	vvi-miR2950-5p_L+2R-2	TATTCCATCTCTTGCACACTG	21	contig_2124584	-	1283	1353	caagtgccaacccaaagagattccaaacatccagagacagtttcggagccTATTCCATCTCTTGCACACTG	4	vvi-MIR2950,mes-MIR2950,atr-MIR2950,ghr-MIR2950,	vvi-MIR2950	tggcttacatgggcttgtgatgtaTTCCATCTCTTGCACACTGGAccagcgctccagctgcagttTGGTGTGCACGGGATGGAATAcatcatggattcatgatgtgg	vvi-miR2950-5p	TTCCATCTCTTGCACACTGGA	3'	Diff	gp2b	...((((.......(((((((........(((.((((...))))))).........)))))))))))....	64	47.9	-13.8	0.4	0	0	0	8	25	33	0	0	0	7.74859	31.7209	31.2323	middle
164	151	vvi-miR3630-3p_L-3_1ss22CT	GGGAATCTCTCTGATGCAT	19	contig_234611	+	1251	1283	taatatgcaaGGAAATCTCTCTGATGCATagtc	2	vvi-MIR3630,han-MIR3630,	vvi-MIR3630	cagtatggttgTGCAAGTGACGATATCAGACAgggacatcagcacctccaatggagaatgatgatttgtcTTTGGGAATCTCTCTGATGCACaagcatattg	vvi-miR3630-3p	TTTGGGAATCTCTCTGATGCAC	3'	Diff	gp2b	...((((((.(((......)))..))))))...	27	36.4	-7.4	0.6	18	5.5	9	2.5	0	0	17.8165	4.74878	10.5528	2.42143	0	0	middle
165	152	vvi-miR3630-3p_L-3	GGGAATCTCTCTGATGCAC	19	contig_4268109	+	702	759	ggacatcagaactctatgtgagagtgttgactcattcttGGGAATCTCTCTGATGCAT	2	vvi-MIR3630,han-MIR3630,	vvi-MIR3630	cagtatggttgTGCAAGTGACGATATCAGACAgggacatcagcacctccaatggagaatgatgatttgtcTTTGGGAATCTCTCTGATGCACaagcatattg	vvi-miR3630-3p	TTTGGGAATCTCTCTGATGCAC	3'	Diff	gp2b	...(((((((.........(((((((......))))))).........)))))))...	52	43.1	-14.8	0.6	159	55.5	60.5	21.5	16.5	27	157.379	47.9195	70.9386	20.8243	20.9358	25.5537	middle
166	153	vvi-miR3630-3p_L-2_1ss22CT	TGGGAATCTCTCTGATGCAT	20	contig_703801	+	1445	1520	ttgtttccatgcactttcttaatttgtccctgaggtggcgttacttatTGGGATTCTCTCTGATGCATgggaagca	2	vvi-MIR3630,han-MIR3630,	vvi-MIR3630	cagtatggttgTGCAAGTGACGATATCAGACAgggacatcagcacctccaatggagaatgatgatttgtcTTTGGGAATCTCTCTGATGCACaagcatattg	vvi-miR3630-3p	TTTGGGAATCTCTCTGATGCAC	3'	Diff	gp2b	.((((((((((((...((.......(((((..(((((....)))))...))))).......))))))).)))))))	75	43.4	-24	0.7	19	0	3.5	0	3.5	3	18.8063	0	4.10389	0	4.44093	2.8393	middle
167	154	vvi-MIR3631c-p5_2ss15AC17TC	ATAAATAAATGCAACTCTTA	20	contig_218009	-	2474	2513	ATAAATAAATGCAACTTTTAcatcacccaaagagcataat	1	vvi-MIR3631c,	vvi-MIR3631c	tagataaataaatgcaaattttagtaagtacttttcttaataagttctaataaatataaatttaggtggtgttttttttttgtctgaatataaaagactaaaatatttgactttttatatttagttaaaagtaaCATGTTGACATCATCCAATATAactaaactcaacatattaataataagttcactttaatcatattggatgatatcaacaagttacttttaactgaataaaaaatactaaaatattttgattttttctaattcaatcaaaaaacaaataccaccttaattaaccatttaagatgtattttcttatttttatttattttttta	vvi-MIR3631c-p5	ataaataaatgcaaatttta	5'	New	gp2b	........((((..((((..........)))).))))...	29	27.5	-2.1	0.2	5.5	0	0	0	0	3	5.44392	0	0	0	0	2.8393	low
168	155	ath-MIR4228-p5_1ss11AG	GTCGGATGCGGAACGGTG	18	contig_106947	-	1612	1669	tgctccctgGTCGGATGCGGAACGGTGtgagccagtctgccactcggctcggggaacc	2	ath-MIR4228,aly-MIR4228,	ath-MIR4228	cggcgtgttgttttaacctaATAGCCTTGAACGCCGTCGTTtcgtctccgacgacattcacacgcgcacacttccacccttaccatctatccgtctcacacgtgcgTCGGATGCGAAACGGTGGTGTtcagggattttttaggttgccggattttacc	ath-MIR4228-p5	gTCGGATGCGAAACGGTG	5'	New	gp2b	...((((((((((..((((((..(((....)))..)))).))..)))).))))))...	52	67.2	-27.3	0.7	44	30	123	44	25	84	43.5514	25.9024	144.222	42.6172	31.7209	79.5003	middle
169	156	gma-MIR4995-p5	GTGGCTTGGTTAAGGGAA	18	contig_1579953	-	821	959	aGTGGCTTGGTTAAAGGAAgaagatagaaatacaaaattcttccacctgattaccatgaagcatagaagccataataaaataaactctatcattgacagttcagggcaggaaagtagaaacatgaaatcaatcaagaaa	1	gma-MIR4995,	gma-MIR4995	taaaactcatAGGCAGTGGCTTGGTTAAGGGaagccactggagccgtagtaaaagcaagtcttcaccgggcaattgtttatggacccgaa	gma-MIR4995-p5	GTGGCTTGGTTAAGGGaa	5'	New	gp2b	.((((((((((...(((..(((((..............)))))..)))....))))...........))))))............(((...(((((...((((..((......)).......)))).)))))..)))..	72	33.8	-21.8	0.5	3	5	2.5	2.5	4	27	2.96941	4.31707	2.93135	2.42143	5.07534	25.5537	middle
170	157	gma-miR4995_L-1R-2	GGCAGTGGCTTGGTTAAG	18	contig_48	-	12015	12064	aatgagccggcgacttttaGGCAGTGGCTTGGTTAAGggaatccaccgga	1	gma-MIR4995,	gma-MIR4995	taaaactcatAGGCAGTGGCTTGGTTAAGGGaagccactggagccgtagtaaaagcaagtcttcaccgggcaattgtttatggacccgaa	gma-miR4995	AGGCAGTGGCTTGGTTAAGGG	3'	Diff	gp2b	....(((((((.(((.......))).)).)))))..((.......))...	30	54	-11.1	0.4	34	40	9.5	100	78	641	33.6533	34.5366	11.1391	96.8573	98.9692	606.663	middle
171	158	gma-MIR4995-p3_1ss19GT	GTGGCTTGGTTAAGGGAAT	19	contig_793865	+	76	113	ctcaccaatgttactcaatGTGGCTTGGTTAAAGGAAT	1	gma-MIR4995,	gma-MIR4995	taaaactcatAGGCAGTGGCTTGGTTAAGGGaagccactggagccgtagtaaaagcaagtcttcaccgggcaattgtttatggacccgaa	gma-MIR4995-p3	GTGGCTTGGTTAAGGGaag	3'	New	gp2b	...(((((.(..((.....))..)))))).........	26	39.5	-8.1	0.5	0	0	0	2.5	0	13	0	0	0	2.42143	0	12.3036	middle
172	159	gma-MIR5033-p3_2ss1GT17TG	TTGTGTTAGATGATGTGTGGA	21	contig_2280098	+	1015	1102	atagcataagtgagacacgagctactgagattattcatggctgcttacaacagaaaaaaactcttgTTGTGTTGGATGATGTGTGGAg	1	gma-MIR5033,	gma-MIR5033	gtgttttttttcaagcagccatgtgtgttagatgatgtttggaaatgagaagaaaaccgtGGCTGTACAAAAGGAAACTACtttcgcaaaacaaacattgccgtccaactgtaagatgagaaaaaaatcaaatgatggggatgtgtctaag	gma-MIR5033-p3	gtgtgttagatgatgtttgga	3'	New	gp2b	...(((((.((..(((((.(((((.((((....)))))))))....((((.((.......)).)))).)))))..))..)))))....	81	39.8	-16.1	0.5	0	0	0	5	0	8	0	0	0	4.84287	0	7.57146	low
173	160	osa-miR5072_L-3	TTCCCCAGCGGAGTCGCCA	19	contig_1155098	-	118	139	atgTTCCCCAGCGGAGTCGCCA	1	osa-MIR5072,	osa-MIR5072	gctgaatagatCGATTCCCCAGCGGAGTCGCCAaaaatcgtgttggcaacttttttgacaagtcgacaagcacgat	osa-miR5072	CGATTCCCCAGCGGAGTCGCCA	3'	Diff	gp2b	..........(((....)))..	10	63.6	-2.4	0.2	0	0	13.5	0	0	2.5	0	0	15.8293	0	0	2.36608	middle
174	161	osa-miR5072_L-3_1ss4TA	ATCCCCAGCGGAGTCGCCA	19	contig_1170910	-	207	283	caaATCCCCAGCGGAGTCGCTAaaaattgttgggttttaaaataatacttttcagaaaaccacaatcaggggatagt	1	osa-MIR5072,	osa-MIR5072	gctgaatagatCGATTCCCCAGCGGAGTCGCCAaaaatcgtgttggcaacttttttgacaagtcgacaagcacgat	osa-miR5072	CGATTCCCCAGCGGAGTCGCCA	5'	Diff	gp2b	...((((((.(((....)))........((((((((((.....((....))....)))))).))))..))))))...	71	37.7	-19.6	0.7	2.5	11	26.5	4.5	3.5	3	2.47451	9.49756	31.0723	4.35858	4.44093	2.8393	middle
175	162	osa-miR5072_L-4_1ss13GA	TCCCCAGCAGAGTCGCCA	18	contig_1483136	-	100	138	aggtgcaaaaagggaaaaattTCCCCAGCAGAGTCGCCA	1	osa-MIR5072,	osa-MIR5072	gctgaatagatCGATTCCCCAGCGGAGTCGCCAaaaatcgtgttggcaacttttttgacaagtcgacaagcacgat	osa-miR5072	CGATTCCCCAGCGGAGTCGCCA	3'	Diff	gp2b	.(((((.....(((((....))))).......).)))).	37	48.7	-9.4	0.5	0	9	20	0	0	0	0	7.77073	23.4508	0	0	0	middle
176	162	osa-miR5072_L-4_1ss13GA	TCCCCAGCAGAGTCGCCA	18	contig_842057	-	124	185	gaaggtgtcttgatatggaaaacgaacatgacaaaagttcgtTCCCCAGCAGAGTCGCCAaa	1	osa-MIR5072,	osa-MIR5072	gctgaatagatCGATTCCCCAGCGGAGTCGCCAaaaatcgtgttggcaacttttttgacaagtcgacaagcacgat	osa-miR5072	CGATTCCCCAGCGGAGTCGCCA	3'	Diff	gp2b	...((((.(((....(((..(((((((.........)))))))..)))...))).))))...	56	45.2	-21.2	0.8	0	9	20	0	0	0	0	7.77073	23.4508	0	0	0	middle
177	163	osa-miR5072_L-4	TCCCCAGCGGAGTCGCCA	18	contig_149460	-	356	383	gtatccgtgaTCCCCAGCGGAGTCGCCA	1	osa-MIR5072,	osa-MIR5072	gctgaatagatCGATTCCCCAGCGGAGTCGCCAaaaatcgtgttggcaacttttttgacaagtcgacaagcacgat	osa-miR5072	CGATTCCCCAGCGGAGTCGCCA	3'	Diff	gp2b	......((((..((....))..))))..	20	64.3	-6.6	0.4	16	43	146.5	24.5	24	17.5	15.8369	37.1268	171.777	23.7301	30.4521	16.5626	middle
178	163	osa-miR5072_L-4	TCCCCAGCGGAGTCGCCA	18	contig_2376512	+	489	525	gtTCCCCAGCGGAGTCGCCAaaaattgttggtgaaat	1	osa-MIR5072,	osa-MIR5072	gctgaatagatCGATTCCCCAGCGGAGTCGCCAaaaatcgtgttggcaacttttttgacaagtcgacaagcacgat	osa-miR5072	CGATTCCCCAGCGGAGTCGCCA	5'	Diff	gp2b	.((((.....))))(((((((......)))))))...	20	48.6	-9.1	0.5	16	43	146.5	24.5	24	17.5	15.8369	37.1268	171.777	23.7301	30.4521	16.5626	middle
179	164	osa-MIR5083-p5_2ss11TG20GT	AATGGATCCTGCTGAGCCTT	20	contig_133195	+	43	196	taagaatgcaaaaaccAATGGATCCTGCTGAGCCTTcattaaagcccattgaggtgatgattattttgttctgaatttcactatgtattacagaaaaatcagactacaattatctgatcggcggggtttttaagcctttgacattgccttccta	1	osa-MIR5083,	osa-MIR5083	tcctggcagttcttcagataatcagatttgtccatgaggtttcaactgttgcattccattgttgagttttattctgtttgcgtttctgtttgtttttgtcatggatctggctgattggaggctgtgatgaccaaaaaatacctacctattttctgagggattccagtccttctgattgatagaaaccaatggatccttctgagcctgccaagatcttcagattcttagttttgtattcggctttttcgatttgtcttcgtatattgcattcttctaaaagcaagcaagattcgtaacagttgatgggatgataacctttcacagaaactgtatgtgttgacccaaaattcAGACTACAATTATCTGATCAactcagacat	osa-MIR5083-p5	aatggatccttctgagcctg	5'	New	gp2b	...(((.((((....(((.((((((((((((..(((((...........))))).(((((((.....((.((((.((((.............))))..))))))...)))))))...)))))))))).......)).)))...)))).)))...	148	37	-31.8	0.6	194	164.5	76	62	48	71	192.022	142.032	89.113	60.0516	60.9041	67.1967	middle
180	165	osa-MIR5083-p3_2ss11TG20GT	AATGGATCCTGCTGAGCCTT	20	contig_826627	-	837	941	ggttagggtctgtgagggcggtgatgttgaaattacctattttatgagggagactaaataaatgctccctaagaatgcaaaaaccAATGGATCCTGCTGAGCCTT	1	osa-MIR5083,	osa-MIR5083	tcctggcagttcttcagataatcagatttgtccatgaggtttcaactgttgcattccattgttgagttttattctgtttgcgtttctgtttgtttttgtcatggatctggctgattggaggctgtgatgaccaaaaaatacctacctattttctgagggattccagtccttctgattgatagaaaccaatggatccttctgagcctgccaagatcttcagattcttagttttgtattcggctttttcgatttgtcttcgtatattgcattcttctaaaagcaagcaagattcgtaacagttgatgggatgataacctttcacagaaactgtatgtgttgacccaaaattcAGACTACAATTATCTGATCAactcagacat	osa-MIR5083-p3	aatggatccttctgagcctg	3'	New	gp2b	((((((((((..(..((..((((((......)))))).........((((((............)))))).............)).)..)))))))....)))..	103	42.9	-30.4	0.7	194	164.5	76	62	48	71	192.022	142.032	89.113	60.0516	60.9041	67.1967	middle
181	166	mtr-MIR5232-p5_1ss10AG	TGCTTTCATGACATCATG	18	contig_3483229	-	1068	1104	TGCTTTCATGACATCATGtgtaattcttggtgtccaa	1	mtr-MIR5232,	mtr-MIR5232	tcctatgaTACATGTCGCTCTCACCTGAAgcatagctgcccaatgctttcataacatcatgagagaattaagaaagaagctgccatcaaattgaacgctggaaggagccatgagagttggcattaccaacg	mtr-MIR5232-p5	tgctttcataacatcatg	5'	New	gp2b	.........(((((((...........)))))))...	25	37.8	-7	0.5	0	0	0	0	6	4	0	0	0	0	7.61301	3.78573	low
182	167	mtr-MIR5232-p5_1ss9TC	TGCTTTCACAACATCATG	18	contig_428789	+	855	880	TGCTTTCACAACATCATGtggaatcc	1	mtr-MIR5232,	mtr-MIR5232	tcctatgaTACATGTCGCTCTCACCTGAAgcatagctgcccaatgctttcataacatcatgagagaattaagaaagaagctgccatcaaattgaacgctggaaggagccatgagagttggcattaccaacg	mtr-MIR5232-p5	tgctttcataacatcatg	5'	New	gp2b	...(((((((......)))))))...	20	42.3	-5.3	0.5	0	0	0	6	11	9	0	0	0	5.81144	13.9572	8.51789	middle
183	168	mtr-MIR5232-p3_1ss10AG	TGCTTTCATGACATCATG	18	contig_860458	+	933	964	aaagaacacatcatTGCTTTCATGACATCATG	1	mtr-MIR5232,	mtr-MIR5232	tcctatgaTACATGTCGCTCTCACCTGAAgcatagctgcccaatgctttcataacatcatgagagaattaagaaagaagctgccatcaaattgaacgctggaaggagccatgagagttggcattaccaacg	mtr-MIR5232-p3	tgctttcataacatcatg	3'	New	gp2b	....................((((....))))	12	34.4	-1.9	0.2	0	0	0	0	6	4	0	0	0	0	7.61301	3.78573	low
184	169	mtr-miR5248_2ss6AT21AT	TTTTTTGTTGGCATGCATTCT	21	contig_1383511	-	602	743	cTTTTTTGTTGGCATGCGTTCTtacaaccctctccacctgatacttttgaggagcttgttaaaaagtttttagctgtttgcaatggattgcccctttctctcaaggtattcggaggacagctatatagaaagtacgacaaag	1	mtr-MIR5248,	mtr-MIR5248	tctcttaagcTTTTTAGTTGGCATGCATTCAgaactccaagtcctaaagaaagttacgctgacctttgtagagatgttgttgagtactgtggggggttgccggtagctcttgaaatcctt	mtr-miR5248	TTTTTAGTTGGCATGCATTCA	5'	Diff	gp2b	...((((((((...(((.((((.......((.(((.((..(((((((.((((((...(((((((...))))))).....((((....))))...))))))..)))))))..)).))).))......)))).)))))))))))	139	40.8	-31.8	0.5	5	3	4.5	4	4	3.5	4.94902	2.59024	5.27642	3.87429	5.07534	3.31251	low
185	169	mtr-miR5248_2ss6AT21AT	TTTTTTGTTGGCATGCATTCT	21	contig_2364602	+	3570	3618	actcgtgcttttttaaaataaattacaaTTTTTTGTTTGCATGCATTCT	1	mtr-MIR5248,	mtr-MIR5248	tctcttaagcTTTTTAGTTGGCATGCATTCAgaactccaagtcctaaagaaagttacgctgacctttgtagagatgttgttgagtactgtggggggttgccggtagctcttgaaatcctt	mtr-miR5248	TTTTTAGTTGGCATGCATTCA	3'	Diff	gp2b	...(((((......(((((........)))))......)))))......	40	24.5	-5.5	0.5	5	3	4.5	4	4	3.5	4.94902	2.59024	5.27642	3.87429	5.07534	3.31251	low
186	170	gma-MIR5368-p5_2ss6TC17GA	CTGTTCCCTGGGATTGACTTTG	22	contig_2416522	+	901	1028	aCTGTTCCCTAGGATTGACTTTGggctctacttgcatagcttaggtggaaggcgaaaaaggccttcttccaagggaacctaagctattagtgagatatcactcttgaAGAGCTAAAATTCTAACCTTG	1	gma-MIR5368,	gma-MIR5368	actgtttcctgggattggctttgggctttcctgcacagcttaggtggagggcaaagaagacttccttctgagggggccagagccatcagagagataccactctggacgagctagaattctaaccttgtgccaggacctatgggccgagGGACAGTCTCAGGTAGACAgt	gma-MIR5368-p5	ctgtttcctgggattggctttg	5'	New	gp2b	.........(((((((.......((((((......((((((((((((((((((.......))))))).........))))))))))).(((((....))))).....))))))..)))))))......	113	43	-40.6	0.7	3	6	4	43.5	18.5	262	2.96941	5.18049	4.69016	42.1329	23.4735	247.965	middle
186	171	gma-MIR5368-p3_1ss1CA	AGAGCTAGAATTCTAACCTTG	21	contig_2416522	+	901	1028	aCTGTTCCCTAGGATTGACTTTGggctctacttgcatagcttaggtggaaggcgaaaaaggccttcttccaagggaacctaagctattagtgagatatcactcttgaAGAGCTAAAATTCTAACCTTG	1	gma-MIR5368,	gma-MIR5368	actgtttcctgggattggctttgggctttcctgcacagcttaggtggagggcaaagaagacttccttctgagggggccagagccatcagagagataccactctggacgagctagaattctaaccttgtgccaggacctatgggccgagGGACAGTCTCAGGTAGACAgt	gma-MIR5368-p3	cgagctagaattctaaccttg	3'	New	gp2b	.........(((((((.......((((((......((((((((((((((((((.......))))))).........))))))))))).(((((....))))).....))))))..)))))))......	113	43	-40.6	0.7	2.5	0	0	0	0	159.5	2.47451	0	0	0	0	150.956	middle
187	170	gma-MIR5368-p5_2ss6TC17GA	CTGTTCCCTGGGATTGACTTTG	22	contig_48	-	10489	10631	aCTGTTCCCTGGGATTGACTTTGggctctgcttgcgcagcttaggtggaaggcgaagaaggcccccttccgggggggcctgagctatcagtgagataccactctagaagagctagaattctaaccttgcgtcagaacctactg	1	gma-MIR5368,	gma-MIR5368	actgtttcctgggattggctttgggctttcctgcacagcttaggtggagggcaaagaagacttccttctgagggggccagagccatcagagagataccactctggacgagctagaattctaaccttgtgccaggacctatgggccgagGGACAGTCTCAGGTAGACAgt	gma-MIR5368-p5	ctgtttcctgggattggctttg	5'	New	gp2b	...((((....))))......((((.((((...(((((....(((((((((((.....(((((((((....)))))))))..)))...((((......))))((((.....))))..))))).)))))))))))).))))...	12	54.5	-47.9	0.6	3	6	4	43.5	18.5	262	2.96941	5.18049	4.69016	42.1329	23.4735	247.965	middle
188	172	gma-MIR5368-p5_2ss3AT17GA	AGTGAGATACCACTCTAGA	19	contig_48	-	10329	10460	gcttaggtggaaggcgaagaaggcccccttccgggggggcctgagctatcAGTGAGATACCACTCTAGAagaGCTAGAATTCTAACCTTGcgtcagaacctactgtccaagagacagtctcaggtagacagt	2	gma-MIR5368,bna-MIR169c,	gma-MIR5368	actgtttcctgggattggctttgggctttcctgcacagcttaggtggagggcaaagaagacttccttctgagggggccagagccatcagagagataccactctggacgagctagaattctaaccttgtgccaggacctatgggccgagGGACAGTCTCAGGTAGACAgt	gma-MIR5368-p5	agagagataccactctgga	5'	New	gp2b	((..(((((((((((.....(((((((((....)))))))))..)))...((((......))))((((.....))))..))))).))).))(((...((((((((((.....))))))...)))).)))...	14	53	-46.3	0.7	94	51	0	140	181.5	1615	93.0416	44.0341	0	135.6	230.294	1528.49	middle
188	173	gma-MIR5368-p3_2	GCTAGAATTCTAACCTTG	18	contig_48	-	10329	10460	gcttaggtggaaggcgaagaaggcccccttccgggggggcctgagctatcAGTGAGATACCACTCTAGAagaGCTAGAATTCTAACCTTGcgtcagaacctactgtccaagagacagtctcaggtagacagt	2	gma-MIR5368,bna-MIR169c,	gma-MIR5368	actgtttcctgggattggctttgggctttcctgcacagcttaggtggagggcaaagaagacttccttctgagggggccagagccatcagagagataccactctggacgagctagaattctaaccttgtgccaggacctatgggccgagGGACAGTCTCAGGTAGACAgt	gma-MIR5368-p3	gctagaattctaaccttg	3'	New	gp2b	((..(((((((((((.....(((((((((....)))))))))..)))...((((......))))((((.....))))..))))).))).))(((...((((((((((.....))))))...)))).)))...	14	53	-46.3	0.7	36	0	0	2.5	14	431.5	35.6329	0	0	2.42143	17.7637	408.385	middle
189	174	gma-MIR5368-p3_1	GAGCTAGAATTCTAACCTTG	20	contig_166566	-	799	897	ctctttagctctcgataatattaaatttcagaagtcttaattcctcctccctagacatggatttcttatctgaatcgGATCTAGAATTCTAACCTTGag	1	gma-MIR5368,	gma-MIR5368	actgtttcctgggattggctttgggctttcctgcacagcttaggtggagggcaaagaagacttccttctgagggggccagagccatcagagagataccactctggacgagctagaattctaaccttgtgccaggacctatgggccgagGGACAGTCTCAGGTAGACAgt	gma-MIR5368-p3	gagctagaattctaaccttg	3'	New	gp2b	..........(((((..................((((...............)))).((((.((((.(((((...)))))..)))).))))...)))))	34	35.4	-13.8	0.4	9.5	0	0	5	7	141	9.40314	0	0	4.84287	8.88185	133.447	middle
190	175	gma-MIR5368-p5_2ss14GA17CA	GAGATACCACTCTAGAAGA	19	contig_1929788	-	1226	1321	gtGAGATACCACTCTAGAAGAgctatttacaaaataaggtcaccaccatggagattgtggtgacccagagttgctcgcctccactggtattttgga	1	gma-MIR5368,	gma-MIR5368	actgtttcctgggattggctttgggctttcctgcacagcttaggtggagggcaaagaagacttccttctgagggggccagagccatcagagagataccactctggacgagctagaattctaaccttgtgccaggacctatgggccgagGGACAGTCTCAGGTAGACAgt	gma-MIR5368-p5	gagataccactctggacga	5'	New	gp2b	..(((((((((....((..((((.((((.........(((((((((.((....)).)))))))))..)))).))))..))....)))))))))...	91	45.8	-29.9	0.7	22	7	0	26	33.5	314.5	21.7757	6.0439	0	25.1829	42.506	297.653	middle
191	176	gma-MIR5368-p5_1ss1CA	AGAGCTAGAATTCTAACCTT	20	contig_2420231	-	1307	1405	acctcaatcaatAGAGCTAGTATTCTAACCTTatatacttgcacaacctatggttaatccaaagaataggcaaagagatactatctttagagatgaaca	1	gma-MIR5368,	gma-MIR5368	actgtttcctgggattggctttgggctttcctgcacagcttaggtggagggcaaagaagacttccttctgagggggccagagccatcagagagataccactctggacgagctagaattctaaccttgtgccaggacctatgggccgagGGACAGTCTCAGGTAGACAgt	gma-MIR5368-p5	cgagctagaattctaacctt	5'	New	gp2b	...((.(((..(((((.(((((((((............((((.....((.(((.....))).)).....))))))).)))))).)))))..)))))...	93	33.3	-18.3	0.6	2.5	0	0	0	3	116	2.47451	0	0	0	3.80651	109.786	middle
192	177	gma-MIR5368-p5	GCTAGAATTCTAACCTTG	18	contig_2516535	+	260	332	aGCTAGAATTCAAACCTTGcaagttttaagtaatgtagcttgtgctatttaaaattatagaaatcttggagaa	1	gma-MIR5368,	gma-MIR5368	actgtttcctgggattggctttgggctttcctgcacagcttaggtggagggcaaagaagacttccttctgagggggccagagccatcagagagataccactctggacgagctagaattctaaccttgtgccaggacctatgggccgagGGACAGTCTCAGGTAGACAgt	gma-MIR5368-p5	gctagaattctaaccttg	5'	New	gp2b	...............(((.((((.(((..((((((((((....))))).....)))))..))).)))))))..	56	28.8	-11.1	0.5	36	0	0	2.5	14	431.5	35.6329	0	0	2.42143	17.7637	408.385	middle
193	178	gma-MIR5368-p3_2ss8GA18TC	GGGATTGACTTTGGGCTCT	19	contig_766576	-	2045	2116	caagttttagagacaacaatgcaaagtagataccggagctctcatGGGATTGACTTTGGTCTCTataatact	1	gma-MIR5368,	gma-MIR5368	actgtttcctgggattggctttgggctttcctgcacagcttaggtggagggcaaagaagacttccttctgagggggccagagccatcagagagataccactctggacgagctagaattctaaccttgtgccaggacctatgggccgagGGACAGTCTCAGGTAGACAgt	gma-MIR5368-p3	gggattggctttgggcttt	3'	New	gp2b	...(((.(((((((.......((((((..((.(((((....)).))).))..))))))))))))).)))...	66	38.9	-17.7	0.6	0	0	0	0	0	22	0	0	0	0	0	20.8215	middle
194	179	gma-MIR5368-p3_2ss18TC20CT	CTAGAATTCTAACCTTGCGTC	21	contig_798685	+	5785	5829	ggttattttaaggcttattgaaATAGAATTCTAACCTTGCGTCag	1	gma-MIR5368,	gma-MIR5368	actgtttcctgggattggctttgggctttcctgcacagcttaggtggagggcaaagaagacttccttctgagggggccagagccatcagagagataccactctggacgagctagaattctaaccttgtgccaggacctatgggccgagGGACAGTCTCAGGTAGACAgt	gma-MIR5368-p3	ctagaattctaaccttgtgcc	3'	New	gp2b	(((((((((((......))))))))........))).........	36	33.3	-4.1	0.3	0	2.5	0	13.5	24.5	99.5	0	2.15854	0	13.0757	31.0865	94.17	middle
195	180	gma-MIR5368-p5_1ss5AT	TCAGTGAGATACCACTCT	18	contig_853070	+	610	644	aTCAATGAGATACCACTCTggttgagttgtattct	1	gma-MIR5368,	gma-MIR5368	actgtttcctgggattggctttgggctttcctgcacagcttaggtggagggcaaagaagacttccttctgagggggccagagccatcagagagataccactctggacgagctagaattctaaccttgtgccaggacctatgggccgagGGACAGTCTCAGGTAGACAgt	gma-MIR5368-p5	tcagagagataccactct	5'	New	gp2b	........(((((.((((.....)))).)))))..	25	37.1	-8.1	0.6	0	3	0	0	5	22.5	0	2.59024	0	0	6.34418	21.2947	middle
196	181	stu-MIR6026-p3_2ss3TC19AC	TTCCTTGGCTAGAGTTGTCTT	21	contig_1103508	+	1217	1265	aacgcttacggttaaacaaTTCCTTGGCTAGAGTTGTCTTccctgcccc	2	stu-MIR6026,sly-MIR6026,	stu-MIR6026	tgaccacttttatttggtAATACAACTATTGCCAAGACAAtgcttcattataagtgcataacttttcactttattgtttgagcattgtgttgatttctctaacttatttttctttgaacaaaattgttttttcatcgcgaaatgcaacaccatgctcagaagttagagagtgaaatgctatgcatttgtaattatatattTTCTTGGCTAGAGTTGTATTGCcaagtcaagtgttttaattg	stu-MIR6026-p3	tTTCTTGGCTAGAGTTGTATT	3'	New	gp2b	...((....((....(((((((........)))))))...))..))...	43	49	-7.8	0.3	9	5	0	14	14	16	8.90824	4.31707	0	13.56	17.7637	15.1429	middle
197	182	stu-miR6027_R-1_2ss11GT20TC	TGAATCCTTCTGCTATCCACA	21	contig_1923492	+	77	197	ggaaTGAATCCTTCTGCTATCCAGAgatgtatcagatattcgcattctatttgcctatcctcggggaaaaaagaaaggtaagcgaaacatggcttaacaggtgcaggaagagagtcataag	2	stu-MIR6027,sly-MIR6027,	stu-MIR6027	tttcataattttacatgattatgggtagcacaaggattaatgtgaaacaaataagtgatatgtgaagaacattggagaattcaaagagttagttgttaggaagaaaacactttgtgtttctcgTGAATCCTTCGGCTATCCATAAtcatgttgaatgtgtgactt	stu-miR6027	TGAATCCTTCGGCTATCCATAA	5'	Diff	gp2b	...((((.(((((((((..(((.((((((...((((((.........))))))..)))).))..)))...........(((((........)))))......)))).))).)).))))...	115	42.1	-24.2	0.5	0	0	0	9.5	7.5	11.5	0	0	0	9.20145	9.51627	10.884	middle
198	182	stu-miR6027_R-1_2ss11GT20TC	TGAATCCTTCTGCTATCCACA	21	contig_3010470	+	798	873	TGAATCCTTCTCCTATCCACAgatttatcagatactcgcactctatttttgcatcttcagggaaaaaggagagata	2	stu-MIR6027,sly-MIR6027,	stu-MIR6027	tttcataattttacatgattatgggtagcacaaggattaatgtgaaacaaataagtgatatgtgaagaacattggagaattcaaagagttagttgttaggaagaaaacactttgtgtttctcgTGAATCCTTCGGCTATCCATAAtcatgttgaatgtgtgactt	stu-miR6027	TGAATCCTTCGGCTATCCATAA	5'	Diff	gp2b	.......(((((((.(((..((((....((((...............)))).))))....)))...)))))))...	66	38.2	-12.2	0.4	0	0	0	9.5	7.5	11.5	0	0	0	9.20145	9.51627	10.884	middle
199	183	hbr-MIR6173-p5_1ss13TG	AATGGGATTAGAGACCCCA	19	contig_1531319	-	539	579	taagggaacaAATGGGATCAGAGACCCCAGTAgtcctagcc	1	hbr-MIR6173,	hbr-MIR6173	cgctgtgcgtatcgacccgtgcagtatccatcgtttaaagctaggggagcggaatgggattagataccccagtagtcctaAGCCGTAAACGATGGATACTgcacgggtcgatacggcacagcgctgtagctaacgcgtta	hbr-MIR6173-p5	aatgggattagatacccca	5'	New	gp2b	...((((.....((((.((...)).))))....))))....	34	51.2	-10.5	0.5	0	0	0	0	0	16.5	0	0	0	0	0	15.6161	middle
199	184	hbr-MIR6173-p3_1ss11TG	TGGGATTAGAGACCCCAGTA	20	contig_1531319	-	539	579	taagggaacaAATGGGATCAGAGACCCCAGTAgtcctagcc	1	hbr-MIR6173,	hbr-MIR6173	cgctgtgcgtatcgacccgtgcagtatccatcgtttaaagctaggggagcggaatgggattagataccccagtagtcctaAGCCGTAAACGATGGATACTgcacgggtcgatacggcacagcgctgtagctaacgcgtta	hbr-MIR6173-p3	tgggattagataccccagta	3'	New	gp2b	...((((.....((((.((...)).))))....))))....	34	51.2	-10.5	0.5	73.5	27.5	0	42.5	39	321.5	72.7506	23.7439	0	41.1644	49.4846	304.278	middle
200	185	hbr-MIR6173-p5_1ss11TG	TGGGATTAGAGACCCCAGTA	20	contig_224	-	1118	1181	taaagctaggggagcaaaTGGGATTAGAGACCCCAGTAGTCCTAgccgtaaacgatggatacta	2	gra-MIR8776d,hbr-MIR6173,	hbr-MIR6173	cgctgtgcgtatcgacccgtgcagtatccatcgtttaaagctaggggagcggaatgggattagataccccagtagtcctaAGCCGTAAACGATGGATACTgcacgggtcgatacggcacagcgctgtagctaacgcgtta	hbr-MIR6173-p5	tgggattagataccccagta	5'	New	gp2b	....(((((((..((...((((.........))))))..)))))))..................	42	46.9	-15.2	0.5	73.5	27.5	0	42.5	39	321.5	72.7506	23.7439	0	41.1644	49.4846	304.278	middle
200	186	hbr-MIR6173-p3_1ss3TG	GAGACCCCAGTAGTCCTA	18	contig_224	-	1118	1181	taaagctaggggagcaaaTGGGATTAGAGACCCCAGTAGTCCTAgccgtaaacgatggatacta	2	gra-MIR8776d,hbr-MIR6173,	hbr-MIR6173	cgctgtgcgtatcgacccgtgcagtatccatcgtttaaagctaggggagcggaatgggattagataccccagtagtcctaAGCCGTAAACGATGGATACTgcacgggtcgatacggcacagcgctgtagctaacgcgtta	hbr-MIR6173-p3	gataccccagtagtccta	3'	New	gp2b	....(((((((..((...((((.........))))))..)))))))..................	42	46.9	-15.2	0.5	7.5	0	0	7.5	18.5	181.5	7.42353	0	0	7.2643	23.4735	171.777	middle
201	187	hbr-MIR6173-p5_1ss9TG	GGATTAGAGACCCCAGTA	18	contig_1081143	-	312	448	GGATTAGAGACCCTAGTAgtcctagcggtaaacaatggatactaagtgttgtgcacatcgaattgtatagtgttgcaattaatgtgctaagtatcatggctgggaagtacattcgcaagaatgaaactcaaaggaat	1	hbr-MIR6173,	hbr-MIR6173	cgctgtgcgtatcgacccgtgcagtatccatcgtttaaagctaggggagcggaatgggattagataccccagtagtcctaAGCCGTAAACGATGGATACTgcacgggtcgatacggcacagcgctgtagctaacgcgtta	hbr-MIR6173-p5	ggattagataccccagta	5'	New	gp2b	...........((((((..(((((((.((.....)).((((((.........((((((..(((((((......))))))).))))))..))))))...)))))))....(((((....)))))..)))...)))...	123	39.4	-35.5	0.7	12	0	0	0	0	64	11.8776	0	0	0	0	60.5717	middle
202	188	hbr-MIR6173-p3_1ss10TG	GGGATTAGAGACCCCAGTA	19	contig_2354947	-	381	405	acgtgGGGATTAGAGACTCCAGTAg	1	hbr-MIR6173,	hbr-MIR6173	cgctgtgcgtatcgacccgtgcagtatccatcgtttaaagctaggggagcggaatgggattagataccccagtagtcctaAGCCGTAAACGATGGATACTgcacgggtcgatacggcacagcgctgtagctaacgcgtta	hbr-MIR6173-p3	gggattagataccccagta	3'	New	gp2b	((.(((((........)))))))..	23	52	-5.2	0.4	30.5	8	0	9.5	11.5	74.5	30.189	6.90732	0	9.20145	14.5916	70.5092	middle
203	189	ppe-MIR6275-p3_2ss6CT18AG	TTATGTTTCCTTTTGCTGCTT	21	contig_3142972	+	194	298	atgaccaaatttacatttggtatcaaagcaatgtgagatcctcttgtccaagatggagtttcgatgacttttagctaagaaccgTTATGTTTCCTTTTGGTGCTT	1	ppe-MIR6275,	ppe-MIR6275	tccaatgctttatgcttccttttgctacttctactggaacttgtttgcctttattacaccaggcagaaaagctccAGTGGAAGTAGCAAGGGGAAGCtggcattggt	ppe-MIR6275-p3	ttatgcttccttttgctactt	3'	New	gp2b	...((((((...((((.((((.((..(((((..((((((((((((....)))).))).))))).......)).)))..))))))..)))).....))))))....	98	37.1	-22.1	0.6	0	0	0	0	3.5	4.5	0	0	0	0	4.44093	4.25894	low
204	190	ppe-MIR6275-p5_2ss6CT18AG	TTATGTTTCCTTTTGCTGCTT	21	contig_4139056	+	25	165	TTATGTTTCCTTTTGCTGCTTgcttgttgacggtattcacaaccttttgcatagttttcatgagtctctggctgcatcacatgccacacacttatgagaaataagcaatttacaaaattttcaaatataaatacgatataa	1	ppe-MIR6275,	ppe-MIR6275	tccaatgctttatgcttccttttgctacttctactggaacttgtttgcctttattacaccaggcagaaaagctccAGTGGAAGTAGCAAGGGGAAGCtggcattggt	ppe-MIR6275-p5	ttatgcttccttttgctactt	5'	New	gp2b	((((((((..(((((....(((((((((...(((.......)))...........((((((((((...((((((.....)).))))...)))))))))))))))))))....))))).....))))))))...........	130	33.3	-29.4	0.6	0	0	0	0	3.5	4.5	0	0	0	0	4.44093	4.25894	low
205	191	gma-miR6300_R+1	GTCGTTGTAGTATAGTGGT	19	contig_1266663	-	1480	1588	aggacagcgtatactattatgtaccgagaaattaataatccattaagctttgtttccagcttaaagccgtacGTCGTTGTAGTATAGTGGTaagtattcccgcctgtca	2	gma-MIR6300,ath-MIR8175,	gma-MIR6300	aggtaaaaatacttaccactatattacaacaacttgtttgtgaaattcaatggtaattttaaataataaatgttttaatattaccgatagcatttgattatatttttgttttaaagttacatttgattatatcgctatcggctataatgtaagtcatattcatccaatatcatgcaacttttttgtatagatatattaatattactcgataatcatcaaGTCGTTGTAGTATAGTGGtaagtattcccgcc	gma-miR6300	GTCGTTGTAGTATAGTGG	3'	Diff	gp2b	..(((((..((((((((.((((((.((....)).........(((((((........)))))))....))))))....))))))))((((.........))))))))).	77	39.4	-23.3	0.5	3560.5	2161.5	3519.5	2074.5	1139.5	2496.5	3524.2	1866.27	4126.75	2009.31	1445.84	2362.77	high
206	192	gma-MIR6300-p5_2	GTATAGTGGTAAGTATTCCC	20	contig_1548723	+	1	140	GTATAGTGGTGAGTATTCCCacctgccacatgggcaacttgtgttcggtacctggtaacgatgccagaaatgtttgctacaaaatgctaggctacagaagaatactatttgcagattttttttgcatcttggggacgttt	1	gma-MIR6300,	gma-MIR6300	aggtaaaaatacttaccactatattacaacaacttgtttgtgaaattcaatggtaattttaaataataaatgttttaatattaccgatagcatttgattatatttttgttttaaagttacatttgattatatcgctatcggctataatgtaagtcatattcatccaatatcatgcaacttttttgtatagatatattaatattactcgataatcatcaaGTCGTTGTAGTATAGTGGtaagtattcccgcc	gma-MIR6300-p5	GTATAGTGGtaagtattccc	5'	New	gp2b	..........(((..((((((..((((.....))))....((((((.((((((((((.....((((....))...)).......))))))).)))....))))))....((((((.....))))))...))))))..)))	130	42.9	-34.4	0.6	28.5	44.5	24.5	17.5	2.5	24	28.2094	38.4219	28.7272	16.95	3.17209	22.7144	middle
207	193	gma-miR6300	GTCGTTGTAGTATAGTGG	18	contig_2645429	-	71	148	gtgatttatcagtagagaaatttataatgaaaaattctccattacgtgatGTCGTTGTAGTATAGTGGtaagtattcc	1	gma-MIR6300,	gma-MIR6300	aggtaaaaatacttaccactatattacaacaacttgtttgtgaaattcaatggtaattttaaataataaatgttttaatattaccgatagcatttgattatatttttgttttaaagttacatttgattatatcgctatcggctataatgtaagtcatattcatccaatatcatgcaacttttttgtatagatatattaatattactcgataatcatcaaGTCGTTGTAGTATAGTGGtaagtattcccgcc	gma-miR6300	GTCGTTGTAGTATAGTGG	3'	Yes	gp2b	...((((((((.((.......(((((((((.....((..........))..)))))))))..)).)))))))).....	70	30.8	-12	0.5	3568	2118	2950	797	557	1629	3531.62	1828.71	3458.99	771.953	706.742	1541.74	high
208	193	gma-miR6300	GTCGTTGTAGTATAGTGG	18	contig_3272090	+	1	138	GTCGTTGTAGTATAGTGGtgagtattcctgtctgcaaagcgggtgacccgtgttcaatccctggcagcggcaccaaaatgtttactatgaaactacactaccatgaatatcaagtcaaaataataaatgcacacgata	1	gma-MIR6300,	gma-MIR6300	aggtaaaaatacttaccactatattacaacaacttgtttgtgaaattcaatggtaattttaaataataaatgttttaatattaccgatagcatttgattatatttttgttttaaagttacatttgattatatcgctatcggctataatgtaagtcatattcatccaatatcatgcaacttttttgtatagatatattaatattactcgataatcatcaaGTCGTTGTAGTATAGTGGtaagtattcccgcc	gma-miR6300	GTCGTTGTAGTATAGTGG	5'	Yes	gp2b	((((.(((.((((.(((((((((.(((..((..(((.....((((..((((..(((.....)))..))))))))....)))..))...)))))).))))))..(((........))).........))))))))))).	137	42	-31.3	0.5	3568	2118	2950	797	557	1629	3531.62	1828.71	3458.99	771.953	706.742	1541.74	high
209	194	gma-MIR6300-p3	GTTGTAGTATAGTGGTAAGT	20	contig_2652307	-	1042	1076	aaaatcattattaaaGTTGTAGTATAGTGGTAAGT	1	gma-MIR6300,	gma-MIR6300	aggtaaaaatacttaccactatattacaacaacttgtttgtgaaattcaatggtaattttaaataataaatgttttaatattaccgatagcatttgattatatttttgttttaaagttacatttgattatatcgctatcggctataatgtaagtcatattcatccaatatcatgcaacttttttgtatagatatattaatattactcgataatcatcaaGTCGTTGTAGTATAGTGGtaagtattcccgcc	gma-MIR6300-p3	GTTGTAGTATAGTGGtaagt	3'	New	gp2b	...((((((((............))))))))....	28	22.9	-4	0.5	13.5	8	0	4	7	12.5	13.3624	6.90732	0	3.87429	8.88185	11.8304	middle
210	195	gma-MIR6300-p5_1	GTATAGTGGTAAGTATTC	18	contig_2711086	-	1449	1592	tttttaGTATAGTGGTAAGTATTCatgatgttctaaatagttatatctaaagtactaaatagttatatctaaagtagaacataatgcatttccccttattctatcttaaggtatgttgaactttactccaaaaaaacactaatc	1	gma-MIR6300,	gma-MIR6300	aggtaaaaatacttaccactatattacaacaacttgtttgtgaaattcaatggtaattttaaataataaatgttttaatattaccgatagcatttgattatatttttgttttaaagttacatttgattatatcgctatcggctataatgtaagtcatattcatccaatatcatgcaacttttttgtatagatatattaatattactcgataatcatcaaGTCGTTGTAGTATAGTGGtaagtattcccgcc	gma-MIR6300-p5	GTATAGTGGtaagtattc	5'	New	gp2b	...(((((....(((..((((..(((.((((((((..(((.((((.(((..........))).)))).)))...)))))))).))).......(((((........)))))............))))))).......)))))..	139	25.7	-23.7	0.6	28.5	44.5	24.5	17.5	2.5	24	28.2094	38.4219	28.7272	16.95	3.17209	22.7144	middle
211	196	ptc-miR6478_R-2	CCGACCTTAGCTCAGTTGG	19	contig_256394	-	1329	1477	tcaactgtttcttgtggttgtcgcgttataatctgactacttccgaagtactttttaaactaacaattggcgatataaatcttgatagatgtacaattatttaatagaaattaacgtaaaCCGATCTTAGCTCAGTTGGtagagcggag	1	ptc-MIR6478,	ptc-MIR6478	aCCGACCTTAGCTCAGTTGGTGgagcggagggctgtaggtcgctggttggattccggcaaggtcggatttcaattttgtaatttcttttctcaccgaccttagttcagaagttgcattgttttgtctgttgaggtggt	ptc-miR6478	CCGACCTTAGCTCAGTTGGTG	3'	Diff	gp2b	(((((((...((..(((((...((((((...((((..(((((...)))))..............(((((.........((((....))))...)))))......))))...)))))).))))).....))..)))))))..........	139	34.2	-22.1	0.4	40	69.5	108.5	24	25	38	39.5922	60.0073	127.22	23.2458	31.7209	35.9644	middle
212	196	ptc-miR6478_R-2	CCGACCTTAGCTCAGTTGG	19	contig_762726	-	728	823	aCCGACCTTAGCTCAGTTGGtagagcggaggactgtagtgggatataaactctctaagacatccttaggtcgctggttcgattccggcaggtcgga	1	ptc-MIR6478,	ptc-MIR6478	aCCGACCTTAGCTCAGTTGGTGgagcggagggctgtaggtcgctggttggattccggcaaggtcggatttcaattttgtaatttcttttctcaccgaccttagttcagaagttgcattgttttgtctgttgaggtggt	ptc-miR6478	CCGACCTTAGCTCAGTTGGTG	5'	Diff	gp2b	.((((((...((((........)))).(((((.(((..((((..........))))..)))))))).....(((((.......))))).)))))).	94	52.1	-35.1	0.7	40	69.5	108.5	24	25	38	39.5922	60.0073	127.22	23.2458	31.7209	35.9644	middle
213	197	ptc-miR6478_R-2_1ss5CT	CCGATCTTAGCTCAGTTGG	19	contig_256396	-	888	990	ccatCCGATCTTAGCTCAGTTGGtagagcggaggactgtagtgggattcaaagtctctattgtaatccttaggtcgctggttcgattccggcagatcggaagc	1	ptc-MIR6478,	ptc-MIR6478	aCCGACCTTAGCTCAGTTGGTGgagcggagggctgtaggtcgctggttggattccggcaaggtcggatttcaattttgtaatttcttttctcaccgaccttagttcagaagttgcattgttttgtctgttgaggtggt	ptc-miR6478	CCGACCTTAGCTCAGTTGGTG	5'	Diff	gp2b	...(((((((...((((........)))).(((((.(..((((((((.....))).)))))..).))))).....(((((.......))))).)))))))...	97	50.5	-34.8	0.7	19	23.5	31.5	31.5	15	10.5	18.8063	20.2902	36.935	30.5101	19.0325	9.93754	middle
214	197	ptc-miR6478_R-2_1ss5CT	CCGATCTTAGCTCAGTTGG	19	contig_583730	+	310	411	acatCCGATCTTAGCTCAGTTGGtagagcggaggactgtagtgggactgaaaatcctgaagtaatccttaggtcgctggttcgattccggcagatcggaata	1	ptc-MIR6478,	ptc-MIR6478	aCCGACCTTAGCTCAGTTGGTGgagcggagggctgtaggtcgctggttggattccggcaaggtcggatttcaattttgtaatttcttttctcaccgaccttagttcagaagttgcattgttttgtctgttgaggtggt	ptc-miR6478	CCGACCTTAGCTCAGTTGGTG	5'	Diff	gp2b	...(((((((...((((........))))(((..(((.....(((........)))...)))..))).......(((((.......))))).)))))))...	96	49	-31.7	0.6	19	23.5	31.5	31.5	15	10.5	18.8063	20.2902	36.935	30.5101	19.0325	9.93754	middle
215	198	ptc-MIR6478-p3_2ss12GA17GA	GCTCAGTTGGTAGAGCAGA	19	contig_5233	+	1114	1137	ataGCTCAGTTGGTAGAGCAGAgg	1	ptc-MIR6478,	ptc-MIR6478	aCCGACCTTAGCTCAGTTGGTGgagcggagggctgtaggtcgctggttggattccggcaaggtcggatttcaattttgtaatttcttttctcaccgaccttagttcagaagttgcattgttttgtctgttgaggtggt	ptc-MIR6478-p3	GCTCAGTTGGTGgagcgga	3'	New	gp2b	...((((........)))).....	16	50	-5.5	0.5	0	0	0	0	3.5	27.5	0	0	0	0	4.44093	26.0269	middle
216	199	ghr-MIR7499-p3_2ss10GC17CG	GGTTAATTCCGTTAACGAAC	20	contig_180	-	5329	5365	nagcgatttgtctGGTTAATTCCGTTAACGAACgaga	1	ghr-MIR7499,	ghr-MIR7499	aataaaaaacATATAATTTTCGGTTAATTCGGTTaaccaaccgaattaactgaaaaatatcggtttggttaag	ghr-MIR7499-p3	GGTTAATTCGGTTaaccaac	3'	New	gp2b	...((.(((((.(((......)))...)))))))...	31	40.5	-4.6	0.3	48	45	0	81	54	519	47.5106	38.8537	0	78.4545	68.5171	491.198	middle
217	200	bdi-MIR7756-p5_1ss12AT	GTTGGCATTGATTTGGCT	18	contig_534959	+	162	212	GTTGGCATTGATTTGGCTtagcattgaaagatcaatgtggtagttggaaat	1	bdi-MIR7756,	bdi-MIR7756	ggcgttgaaacCAATGCAATGCCAAGTCTTTCGAtgttgctttgtttgcatgtatacatTGGAGATGTTGGCATTGAATTGGCtccaatgcca	bdi-MIR7756-p5	GTTGGCATTGAATTGGCt	5'	New	gp2b	...........((..(((..(((((((....)))))))...)))..))...	37	37.3	-13	0.7	0	0	0	0	6	7	0	0	0	0	7.61301	6.62502	low
218	201	tae-miR7757-5p_R-1_2ss6AT21TC	ATAAATCCTTCAGCTATCCAC	21	contig_331149	-	1206	1253	ccctgaATAAATCCTTCTGCTATCCACacataaatgagatattcaaca	1	tae-MIR7757,	tae-MIR7757	tgcattacatATAAAACCTTCAGCTATCCATCtccatatcagcctgtctctcttaattttgaaacattttggaaatatgcttaaatatccttgaacataagaacgagccacacatgctgcaccaatactatgaaaagtagcatagaatgagtaaaagaggctcttgacttttagatcatgcaagagctttgatctacaggtaaacccttttttactaactactagcagctttaatctgccttcttatctatatgattagttattatgtctaagtatgtttttagaagattaagcaagctcattcgatatgtaaatggatagtttgaggttttatttataatgat	tae-miR7757-5p	ATAAAACCTTCAGCTATCCATC	5'	Diff	gp2b	...((((((..((......................))..))))))...	42	35.4	-2.7	0.2	0	0	0	5.5	4	4	0	0	0	5.32715	5.07534	3.78573	low
219	201	tae-miR7757-5p_R-1_2ss6AT21TC	ATAAATCCTTCAGCTATCCAC	21	contig_3632351	+	1028	1117	caatctctacctggtctctgaATAAATCCTTCTGCTATCCACagataaacgagatattcgggctttattctctcatcctcgggaaagaaa	1	tae-MIR7757,	tae-MIR7757	tgcattacatATAAAACCTTCAGCTATCCATCtccatatcagcctgtctctcttaattttgaaacattttggaaatatgcttaaatatccttgaacataagaacgagccacacatgctgcaccaatactatgaaaagtagcatagaatgagtaaaagaggctcttgacttttagatcatgcaagagctttgatctacaggtaaacccttttttactaactactagcagctttaatctgccttcttatctatatgattagttattatgtctaagtatgtttttagaagattaagcaagctcattcgatatgtaaatggatagtttgaggttttatttataatgat	tae-miR7757-5p	ATAAAACCTTCAGCTATCCATC	5'	Diff	gp2b	...(((...((.((.....(((((((.((.((((.......))))....((((...)))))).)))))))......))..))...)))..	85	41.1	-14.3	0.4	0	0	0	5.5	4	4	0	0	0	5.32715	5.07534	3.78573	low
220	202	stu-MIR8045-p3_2ss6TC19GT	TTTATCCCTTTTTCCTATT	19	contig_224	-	117	140	tttaTTTATCCCTTTTTCCTATTa	1	stu-MIR8045,	stu-MIR8045	acacccttcaattatcatttattcctttttcctatgttgatattttagcttagaaaatggagcaattgATTGATAGTTGAGGTGTGTTT	stu-MIR8045-p3	tttattcctttttcctatg	3'	New	gp2b	......((...........))...	15	20.8	4.7	-0.9	0	0	0	0	0	10	0	0	0	0	0	9.46432	low
221	203	stu-MIR8045-p5_2ss6TC19GT	TTTATCCCTTTTTCCTATT	19	contig_4688865	-	716	810	aTTTATCCCTTTTTCCTATTttattatgaggatattcattccaagtggcatatctcataataggatgctaaactagtatgtcttaggggatacca	1	stu-MIR8045,	stu-MIR8045	acacccttcaattatcatttattcctttttcctatgttgatattttagcttagaaaatggagcaattgATTGATAGTTGAGGTGTGTTT	stu-MIR8045-p5	tttattcctttttcctatg	5'	New	gp2b	...((((((((.........((((((((((.((((((((.....)))).)))))))))))))).((((((...)))))).....))))))))...	89	32.6	-24.5	0.8	0	0	0	0	0	10	0	0	0	0	0	9.46432	low
222	204	ath-miR8175_L-2	TCCCCGGCAACGGCGCCA	18	contig_293230	+	451	530	gTCCCCGGCAACGGCGCCAaaaatgttgggtcattgaaaatccaatcatttaaccaacagattcaattgtcggtgtcatt	1	ath-MIR8175,	ath-MIR8175	cttaaggcaatttgacctatatcaaatttggcaccgttgccggggatcgacccgggtcacccgcgtgacaggcgggaatacttaccacttagtacaacgacccaatatagtggtaagtattctcgcatgtcactcgggttcGATCCCCGGCAACGGCGCCAaatttgatatagctcaaatcgccttaag	ath-miR8175	GATCCCCGGCAACGGCGCCA	5'	Diff	gp2b	......((((.(((((.......((((((.....(((........))).....))))))........))))).))))...	71	43.8	-19.1	0.5	23	89	149.5	35	25	30.5	22.7655	76.8439	175.295	33.9001	31.7209	28.8662	middle
223	205	ath-miR8175_L-1	ATCCCCGGCAACGGCGCCA	19	contig_3155452	+	2335	2480	taactgttggtgcagagttgacgagctaaactgaatcaactcctaaacaatgccccccaactgtaaatgagcaaagactgggaataaaaccagagatcttcaaattataaaatgatttgaATCCCCGGCAACAGCGCCAactagaa	1	ath-MIR8175,	ath-MIR8175	cttaaggcaatttgacctatatcaaatttggcaccgttgccggggatcgacccgggtcacccgcgtgacaggcgggaatacttaccacttagtacaacgacccaatatagtggtaagtattctcgcatgtcactcgggttcGATCCCCGGCAACGGCGCCAaatttgatatagctcaaatcgccttaag	ath-miR8175	GATCCCCGGCAACGGCGCCA	3'	Diff	gp2b	...((((((((((.(((((((..((.....))...)))))))........((((.......................((((........)))).....((((((((((...)))))))))).....))))...)))))))).))..	141	41.1	-38	0.6	3	12	19.5	0	3	2.5	2.96941	10.361	22.8645	0	3.80651	2.36608	middle
224	206	ath-miR8175	GATCCCCGGCAACGGCGCCA	20	contig_88961	+	1829	1923	aaagccataggatatatatagcattcgagaactaccaggaaaagcatcagggccaaatataagaatgcctttgaaGATCCCTGGCAACGGCGCCA	1	ath-MIR8175,	ath-MIR8175	cttaaggcaatttgacctatatcaaatttggcaccgttgccggggatcgacccgggtcacccgcgtgacaggcgggaatacttaccacttagtacaacgacccaatatagtggtaagtattctcgcatgtcactcgggttcGATCCCCGGCAACGGCGCCAaatttgatatagctcaaatcgccttaag	ath-miR8175	GATCCCCGGCAACGGCGCCA	3'	Yes	gp2b	...((((..((((.......((((((........((..((......))..))..........))))))........)))).))))..........	82	44.2	-19.1	0.5	0	0	7	5	0	0	0	0	8.20777	4.84287	0	0	low
225	207	atr-MIR8552a-p3_2ss4GC20TG	TTTCAATTATTTGGATGTGGA	21	contig_2193167	-	138	194	ccttcctttcctgattgtgtttcatattatgtacctTTTCAATTATTTGGATGTTGA	1	atr-MIR8552a,	atr-MIR8552a	gctgagattagcctactagctcatgtgaatatatgagcccaacgacctagattgaatctggattgatctgacggtcatgacctcattttgtatttgaattttaataatttttgtacgaatcaaaataacttgaaatcttaggtgtgtgttcttcaaaaataggataatctactaaaaatatcaaaaaaataattttcaagtaataaattgatcaaaatactctcgaaacgtttcaagggtattttggtcttttttatgaattatttttaaaatatttttattaggtgcgtcttgatgataagaatggacacttaaaattttgaattatttggatgtgtaaaaaaaaaaatcaaaattcaaacaCGAAATGAGGTCGTGACCGTCAGAtcaggctagatt…	atr-MIR8552a-p3	tttgaattatttggatgtgta	3'	New	gp2b	...(((.....((((((......................))))))...)))......	48	31.6	-3.3	0.2	0	0	0	0	10	5	0	0	0	0	12.6884	4.73216	middle
226	208	atr-MIR8552a-p5_2ss10TA17TA	TAGATTGAAACTGGATAGATC	21	contig_954	+	1797	1917	gaaatgttgTAGATTGAAACTGGATAGATCagattaggatgatgaaagattataaaaaaaaatannnnnnnnnnataataattctttttgacttgacccccccctttctctctgacatgga	1	atr-MIR8552a,	atr-MIR8552a	gctgagattagcctactagctcatgtgaatatatgagcccaacgacctagattgaatctggattgatctgacggtcatgacctcattttgtatttgaattttaataatttttgtacgaatcaaaataacttgaaatcttaggtgtgtgttcttcaaaaataggataatctactaaaaatatcaaaaaaataattttcaagtaataaattgatcaaaatactctcgaaacgtttcaagggtattttggtcttttttatgaattatttttaaaatatttttattaggtgcgtcttgatgataagaatggacacttaaaattttgaattatttggatgtgtaaaaaaaaaaatcaaaattcaaacaCGAAATGAGGTCGTGACCGTCAGAtcaggctagatt…	atr-MIR8552a-p5	tagattgaatctggattgatc	5'	New	gp2b	...(((((..(((..((((..((....((((........))))((((((((((........................)))).))))))............))..))))..))))))))...	115	28.9	-11.6	0.3	0	0	0	0	5	5	0	0	0	0	6.34418	4.73216	low
1	1	ath-miR156a-5p_L+1	CTGACAGAAGAGAGTGAGCAC	21						183	ath-MIR156b,ppt-MIR156c,ppt-MIR156a,mtr-MIR156i,mtr-MIR156c,mtr-MIR156d,mtr-MIR156b,gma-MIR156h,gma-MIR156v,gma-MIR156a,gma-MIR156x,gma-MIR156o,gma-MIR156u,gma-MIR156w,gma-MIR156y,gma-MIR156k,gma-MIR156n,gma-MIR156f,gma-MIR156b,ptc-MIR156a,ptc-MIR156f,ptc-MIR156b,ptc-MIR156d,ptc-MIR156c,ptc-MIR156e,ath-MIR156e,ath-MIR156a,ath-MIR156d,ath-MIR156f,ath-MIR156c,bra-MIR156c,ath-MIR156j,stu-MIR156g,stu…	ath-MIR156c	cgcatagaaacTGACAGAAGAGAGTGAGCACacaaaggcactttgcatgttcgatgcatttgcttctcttgcgtGCTCACTGCTCTATCTGTCAGAttccggct	ath-miR156a-5p	TGACAGAAGAGAGTGAGCAC	5'	Diff	gp3	(((((((((((((((((..(.((..((((...(((.((((((.(((((((((((((((((((((((..(((.(((..((((((....))))))..))).)))..))))))).))))).))))))))))).....))))))..)))....))))..)).)..)))))))))))....)))))).	182	47.5	-92.9	1.1	4.5	4.5	3.5	20	0	2.5	4.45412	3.88537	4.10389	19.3715	0	2.36608	middle
2	2	mdm-miR156aa_L+1	TTGACAGAAGATAGAGAGCAC	21						73	mdm-MIR156ac,mtr-MIR156f,mtr-MIR156h,mtr-MIR156e,gma-MIR156m,gma-MIR156c,gma-MIR156j,gma-MIR156e,gma-MIR156l,gma-MIR156g,gma-MIR156d,gma-MIR156i,ptc-MIR156h,ptc-MIR156i,ptc-MIR156j,ptc-MIR156g,ath-MIR157b,ath-MIR157c,ath-MIR157a,gra-MIR157a,gra-MIR157b,stu-MIR156b,stu-MIR156a,stu-MIR156c,stu-MIR156d,mdm-MIR156ab,aly-MIR157c,aly-MIR157a,aly-MIR157b,ppe-MIR156h,ppe-MIR156g,ppe-MIR156i,vvi-MIR156f,v…	mdm-MIR156ab	aggagtggggaactgggagagagaaagagcagggagtgatgatacattgtTGACAGAAGATAGAGAGCACagatggatgacttgcaattgactatgcatctcactcctttgtgctctctatgcttctgtcatcacctcgttatatctagcttccttgcctctctccacacccgtgcacct	mdm-miR156aa	TGACAGAAGATAGAGAGCAC	5'	Diff	gp3	(((((..(((((((.((((...((((.(((..(((..(((..(((((...((((.(((.......(((((((..(((((........(((((((((((((((((((((((.((((((..((((........))))..))).))))))))))))))))).)))))))))))))).((((......)))))))))))..))).))))...)))))..)))))).....))).))))..)))).)))))))...)))))	99	42.6	-99.5	0.9	0	0	10	0	0	0	0	0	11.7254	0	0	0	middle
3	3	osa-miR156a_L+1	CTGACAGAAGAGAGTGAGCAC	21						25	osa-MIR156c,mtr-MIR156i,mtr-MIR156c,mtr-MIR156b,ath-MIR156f,stu-MIR156h,stu-MIR156j,stu-MIR156k,stu-MIR156i,sly-MIR156d,osa-MIR156f,osa-MIR156h,osa-MIR156b,osa-MIR156g,bdi-MIR156d,bdi-MIR156h,bdi-MIR156e,bdi-MIR156b,zma-MIR156l,zma-MIR156g,zma-MIR156d,zma-MIR156f,zma-MIR156e,zma-MIR156i,ata-MIR156c,	osa-MIR156g	ggcTGACAGAAGAGAGTGAGCACacagcgggcagactgcatctgaattacctgttgcgacgaagaagacgacggacgcagcttgccgttgcgtGCTCACTTCTCTCTCTGTCAGCt	osa-miR156a	TGACAGAAGAGAGTGAGCAC	5'	Diff	gp3	((((((((((((..(.(((((((.(((((((((((((((((((((((((((((((....(((..(((((((....))...)))))..))))))))))))))))))).)))).))))))))))...).))))))))..))))))))))))	149	49	-90.9	1.2	4.5	4.5	3.5	20	0	2.5	4.45412	3.88537	4.10389	19.3715	0	2.36608	middle
4	4	zma-miR159c-3p_L-2R+2	TGGATTGAAGGGAGCTCCTCC	21						21	zma-MIR159d,pde-MIR159,ptc-MIR159d,ptc-MIR159b,ptc-MIR159a,ath-MIR159c,ath-MIR159b,aly-MIR159c,aly-MIR159b,atr-MIR159,lus-MIR159c,lus-MIR159b,cme-MIR159b,aqc-MIR159,osa-MIR159e,osa-MIR159f,bdi-MIR159a,bdi-MIR159c,sbi-MIR159b,zma-MIR159c,sof-MIR159c,	zma-MIR159c	atgattaagaaaggcgatcgaaGAGCTCCCTTCGATCCAATCCaggaggggaagtggtcggttgcagctgccggttcatggatacctctctggtgcagcaatggccgctgctcacctctgcacttgcatgggtgtgcatgacccgggagatgagcccgccatcatctttccctcgtgCTTGGATTGAAGGGAGCTCCTctctgtctgtctgtctgtc	zma-miR159c-3p	CTTGGATTGAAGGGAGCTCCT	3'	Diff	gp3	(((((((....((..((..((.((((((((((((((((((..((.((((((((((((((((......((.((((.(((((.((((((....(((((((....(((......)))...))))))).....)))))).))))).)))).)).....)))))))....))))))))).)).)))))))))))))))))).))..))..))))).))))..	215	55.3	-107.5	0.9	0	0	4	127.45	389.75	493.65	0	0	4.69016	123.445	494.529	467.206	middle
5	5	tae-miR160_L-2R+2	CCTGGCTCCCTGTATGCCATC	21						32	tae-MIR160,pab-MIR160b,ppt-MIR160g,ppt-MIR160h,smo-MIR160a,smo-MIR160b,mtr-MIR160b,mtr-MIR160e,mtr-MIR160c,gma-MIR160a,gma-MIR160b,stu-MIR160a,mdm-MIR160c,ppe-MIR160a,ppe-MIR160a,ppe-MIR160a,ppe-MIR160a,ppe-MIR160a,ppe-MIR160a,ppe-MIR160a,ppe-MIR160a,nta-MIR160b,nta-MIR160a,mes-MIR160g,lus-MIR160j,lus-MIR160a,cme-MIR160b,bra-MIR160a,bna-MIR160a,cpa-MIR160a,sly-MIR160a,han-MIR160a,	tae-MIR160	agaggtgaaaacaatgggataTGCCTGGCTCCCTGTATGCCActcgcgtagctgccaactccccaaaccttgcgttggctctaccgcggatggcgtgcgaggagccaagcatgaccgtctctctctctctctctctctctctctctct	tae-miR160	TGCCTGGCTCCCTGTATGCCA	5'	Diff	gp3	(((((.((.....((((..(((((.(((((((..((((((((..(((((((..((((((..............)))))).))).))))..))))))))..))))))).))))).)))).....)))))))..................	130	56.8	-62.8	0.7	0	0	0	8	0	0	0	0	0	7.74859	0	0	low
6	6	cln-miR162_1ss21GT	TTGATAAACCTCTGCATCCAT	21						38	cln-MIR162,pde-MIR162,mtr-MIR162,gma-MIR162c,gma-MIR162a,gma-MIR162b,ptc-MIR162b,ptc-MIR162a,ath-MIR162b,ath-MIR162a,stu-MIR162b,stu-MIR162a,mdm-MIR162a,mdm-MIR162b,aly-MIR162a,aly-MIR162b,ppe-MIR162,vvi-MIR162,nta-MIR162a,nta-MIR162b,mes-MIR162,lus-MIR162a,lus-MIR162b,cme-MIR162,bra-MIR162,tcc-MIR162,cpa-MIR162a,ghr-MIR162a,sly-MIR162,rco-MIR162,csi-MIR162,vun-MIR162,htu-MIR162a,aau-MIR162,hpe-M…	cln-MIR162	ttaactggaggcagggttttatccatcccttcctgttactgatttaaggctctgctcacaattaactgcagttaacaggcacgggTTGATAAACCTCTGCATCCAGtttgg	cln-miR162	TTGATAAACCTCTGCATCCAG	3'	Diff	gp3	..(((((((.((((((.((((((.((((...((((((((((..(((((((...))).....))))...))).)))))))...)))).)))))).)))))).)))))))...	106	45	-42.2	0.8	377	332	141	1759	1470	2056	373.156	286.654	165.328	1703.72	1865.19	1945.86	middle
7	7	zma-miR164h-5p_R-1_1ss19GT	TGGAGAAGCAGGGCACGTTT	20						14	zma-MIR164h,cln-MIR164,aly-MIR164c,bra-MIR164b,bna-MIR164b,ctr-MIR164,osa-MIR164f,osa-MIR164b,osa-MIR164e,bdi-MIR164a,zma-MIR164c,zma-MIR164b,tae-MIR164,ata-MIR164b,	zma-MIR164h	gTGGAGAAGCAGGGCACGTGTGaattcattcgttccatcgacggtctggcgccgactcacgcatcgccggcgcggcgagctgagcgcgtgacacggaaagcaggtccgccgcgccggcgcccgcgctggccgatcgaccggctaactgtagctccacgaagcaaagccaggccagccggccgatcgatgcgtgcgtgCATGTGCCCTTCTTCTCCATCg	zma-miR164h-5p	TGGAGAAGCAGGGCACGTGTG	5'	Diff	gp3	(((((((((.(((((((((((....................((((.....))))((.((((((((((((((((((...((((.(((((.....((((.......)))).)))))))))..)))))))))).(((((.((((((..(((..(((......))).....)))...)))))).))))))))))))).))))))))))))).)))))))))..	217	66.7	-113.1	0.8	0	0	0	0	5	14	0	0	0	0	6.34418	13.25	middle
7	8	zma-miR164c-3p_L-1R+1_1ss9CA	ATGTGCCATTCTTCTCCATCA	21						14	zma-MIR164h,cln-MIR164,aly-MIR164c,bra-MIR164b,bna-MIR164b,ctr-MIR164,osa-MIR164f,osa-MIR164b,osa-MIR164e,bdi-MIR164a,zma-MIR164c,zma-MIR164b,tae-MIR164,ata-MIR164b,	zma-MIR164c	tggcgaggtgcgcgcggTGGAGAAGCAGGGCACGTGCAttctttccgtcgccggccggcttggcagcggccggcggcccggctctcgcagtcacgcgtacgtcgcctgagcggcgcgcgcgagagagagagacacggcaggtcgtcgccggcgcggctaactggtgcaggtgcagcagctagcttctgaaacccagccagccagccagccggccggccggccgatcgatgcgtgCATGTGCCCTTCTTCTCCATCgggcacgcctcgcct	zma-miR164c-3p	CATGTGCCCTTCTTCTCCATC	3'	Diff	gp3	(((((((((.(((((((((((....................((((.....))))((.((((((((((((((((((...((((.(((((.....((((.......)))).)))))))))..)))))))))).(((((.((((((..(((..(((......))).....)))...)))))).))))))))))))).))))))))))))).)))))))))..	217	66.7	-113.1	0.8	0	9	0	58	52	61	0	7.77073	0	56.1773	65.9795	57.7324	middle
8	9	aly-miR166b-5p	GGACTGTTGTCTGGCTCGAGG	21						133	aly-MIR166b,pab-MIR166a,pab-MIR166b,pde-MIR166b,pde-MIR166a,ppt-MIR166j,ppt-MIR166l,ppt-MIR166k,mtr-MIR166a,mtr-MIR166g,mtr-MIR166b,mtr-MIR166c,gma-MIR166d,gma-MIR166f,gma-MIR166r,gma-MIR166b,gma-MIR166a,gma-MIR166c,gma-MIR166u,gma-MIR166n,gma-MIR166m,gma-MIR166k,gma-MIR166o,gma-MIR166q,ptc-MIR166h,ptc-MIR166g,ptc-MIR166a,ptc-MIR166j,ptc-MIR166k,ptc-MIR166q,ptc-MIR166n,ptc-MIR166o,ptc-MIR166c,ath…	aly-MIR166b	agagggatttttcttttgaggGGACTGTTGTCTGGCTCGAGGtctcttattctaatacaatctcatttcaatagtctcagatctgatgattgattagggttttagcatcTCGGACCAGGCTTCATTCCCCccaattattactccctct	aly-miR166b-5p	GGACTGTTGTCTGGCTCGAGG	5'	Yes	gp3	(((((((........(((.(((((.((..((((((..((((((((...(..(((((.((((((((..((..........))..))).))))))))))..)...)).))))))..))))))..)).))))).))).......)))))))	119	41.9	-58.9	0.9	4	10	6.5	233	100.5	126	3.95922	8.63414	7.6215	225.678	127.518	119.25	middle
8	10	aly-miR166a-3p_2ss1TC20CA	CCGGACCAGGCTTCATTCCAC	21						133	aly-MIR166b,pab-MIR166a,pab-MIR166b,pde-MIR166b,pde-MIR166a,ppt-MIR166j,ppt-MIR166l,ppt-MIR166k,mtr-MIR166a,mtr-MIR166g,mtr-MIR166b,mtr-MIR166c,gma-MIR166d,gma-MIR166f,gma-MIR166r,gma-MIR166b,gma-MIR166a,gma-MIR166c,gma-MIR166u,gma-MIR166n,gma-MIR166m,gma-MIR166k,gma-MIR166o,gma-MIR166q,ptc-MIR166h,ptc-MIR166g,ptc-MIR166a,ptc-MIR166j,ptc-MIR166k,ptc-MIR166q,ptc-MIR166n,ptc-MIR166o,ptc-MIR166c,ath…	aly-MIR166a	ggggttttctcttttgaggGGAATGTTGTCTGGCTCGAGGactctggctcgctctattcatgttggatctttttcgatctaataatcgaattgaacctccagatttcagatctgactagggttttagcgtcgTCGGACCAGGCTTCATTCCCCccaattgttgctcc	aly-miR166a-3p	TCGGACCAGGCTTCATTCCCC	3'	Diff	gp3	(((((((........(((.(((((.((..((((((..((((((((...(..(((((.((((((((..((..........))..))).))))))))))..)...)).))))))..))))))..)).))))).))).......)))))))	119	41.9	-58.9	0.9	0	0	0	114.5	29	40.5	0	0	0	110.902	36.7962	38.3305	middle
9	9	aly-miR166b-5p	GGACTGTTGTCTGGCTCGAGG	21						37	aly-MIR166b,mtr-MIR166g,gma-MIR166b,gma-MIR166a,gma-MIR166c,gma-MIR166l,gma-MIR166u,gma-MIR166n,gma-MIR166m,gma-MIR166o,gma-MIR166q,ath-MIR166a,ath-MIR166b,ath-MIR165a,stu-MIR166a,aly-MIR166d,aly-MIR165a,aly-MIR166c,aly-MIR166a,csi-MIR166a,csi-MIR166e,osa-MIR166b,osa-MIR166a,osa-MIR166h,osa-MIR166d,bdi-MIR166c,bdi-MIR166b,bdi-MIR166e,zma-MIR166b,zma-MIR166a,zma-MIR166d,zma-MIR166m,zma-MIR166e,zma…	aly-MIR166b	agagggatttttcttttgaggGGACTGTTGTCTGGCTCGAGGtctcttattctaatacaatctcatttcaatagtctcagatctgatgattgattagggttttagcatcTCGGACCAGGCTTCATTCCCCccaattattactccctct	aly-miR166b-5p	GGACTGTTGTCTGGCTCGAGG	5'	Yes	gp3	(((((((........(((.(((((.((..((((((..((((((((...(..(((((.((((((((..((..........))..))).))))))))))..)...)).))))))..))))))..)).))))).))).......)))))))	119	41.9	-58.9	0.9	4	10	6.5	233	100.5	126	3.95922	8.63414	7.6215	225.678	127.518	119.25	middle
9	11	aly-miR166a-3p_2ss1TC17TC	CCGGACCAGGCTTCATCCCCC	21						37	aly-MIR166b,mtr-MIR166g,gma-MIR166b,gma-MIR166a,gma-MIR166c,gma-MIR166l,gma-MIR166u,gma-MIR166n,gma-MIR166m,gma-MIR166o,gma-MIR166q,ath-MIR166a,ath-MIR166b,ath-MIR165a,stu-MIR166a,aly-MIR166d,aly-MIR165a,aly-MIR166c,aly-MIR166a,csi-MIR166a,csi-MIR166e,osa-MIR166b,osa-MIR166a,osa-MIR166h,osa-MIR166d,bdi-MIR166c,bdi-MIR166b,bdi-MIR166e,zma-MIR166b,zma-MIR166a,zma-MIR166d,zma-MIR166m,zma-MIR166e,zma…	aly-MIR166a	ggggttttctcttttgaggGGAATGTTGTCTGGCTCGAGGactctggctcgctctattcatgttggatctttttcgatctaataatcgaattgaacctccagatttcagatctgactagggttttagcgtcgTCGGACCAGGCTTCATTCCCCccaattgttgctcc	aly-miR166a-3p	TCGGACCAGGCTTCATTCCCC	3'	Diff	gp3	(((((((........(((.(((((.((..((((((..((((((((...(..(((((.((((((((..((..........))..))).))))))))))..)...)).))))))..))))))..)).))))).))).......)))))))	119	41.9	-58.9	0.9	0	0	0	12	5.5	2.5	0	0	0	11.6229	6.9786	2.36608	middle
10	12	mtr-miR169b_R+1	CAGCCAAGGATGACTTGCCGGT	22						40	mtr-MIR169b,mtr-MIR169g,mtr-MIR169l,gma-MIR169u,gma-MIR169h,gma-MIR169a,gma-MIR169e,ptc-MIR169h,ptc-MIR169s,ath-MIR169c,ath-MIR169a,ath-MIR169d,mdm-MIR169c,mdm-MIR169d,aly-MIR169c,aly-MIR169a,vvi-MIR169m,vvi-MIR169p,vvi-MIR169c,vvi-MIR169d,vvi-MIR169a,mes-MIR169a,mes-MIR169f,mes-MIR169g,mes-MIR169d,lus-MIR169h,cme-MIR169f,cme-MIR169e,bna-MIR169n,tcc-MIR169l,tcc-MIR169e,vun-MIR169,osa-MIR169b,osa-…	mtr-MIR169l	gcagagagtgtagtaCAGCCAAGGATGACTTGCCGGccggcgttagtgaaggcaaaggcaaatgatcattcatgttcatgcatgcatattctccggccGGCAAGTTTTTCCTTGGCTATAttggactttcttc	mtr-miR169b	CAGCCAAGGATGACTTGCCGG	5'	Diff	gp3	.((((.((.((((((..(((((((((........((((....))))......)))))))))..)))))).)).))))	76	42.9	-30.9	0.9	9	31	16	35	53	74	8.90824	26.7658	18.7606	33.9001	67.2483	70.036	middle
10	13	ath-miR169a-3p_R+1_1ss16GA	GGCAAGTTGTCCTTGACTACA	21						40	mtr-MIR169b,mtr-MIR169g,mtr-MIR169l,gma-MIR169u,gma-MIR169h,gma-MIR169a,gma-MIR169e,ptc-MIR169h,ptc-MIR169s,ath-MIR169c,ath-MIR169a,ath-MIR169d,mdm-MIR169c,mdm-MIR169d,aly-MIR169c,aly-MIR169a,vvi-MIR169m,vvi-MIR169p,vvi-MIR169c,vvi-MIR169d,vvi-MIR169a,mes-MIR169a,mes-MIR169f,mes-MIR169g,mes-MIR169d,lus-MIR169h,cme-MIR169f,cme-MIR169e,bna-MIR169n,tcc-MIR169l,tcc-MIR169e,vun-MIR169,osa-MIR169b,osa-…	ath-MIR169a	gtgacgaaagtagtgtgCAGCCAAGGATGACTTGCCGAtttaaatgatctttctttatactctattaagacaatttagtttcaaacttttttttttttttttttttgaaggattcaggaagaaattaggatatattattccgtataaaatacaagatatataaaaccaaaaagaaaaagtaacatgatcGGCAAGTTGTCCTTGGCTACacgttactttgtgtcgc	ath-miR169a-3p	GGCAAGTTGTCCTTGGCTAC	3'	Diff	gp3	.((((.((.((((((..(((((((((........((((....))))......)))))))))..)))))).)).))))	76	42.9	-30.9	0.9	11	6	5	0	0	0	10.8878	5.18049	5.86269	0	0	0	middle
11	14	gma-miR171k-3p_L+1	CTTGAGCCGCGCCAATATCACT	22						13	gma-MIR171k,gma-MIR171l,mdm-MIR171j,mdm-MIR171k,mdm-MIR171l,ppe-MIR171b,vvi-MIR171f,nta-MIR171b,sly-MIR171d,sly-MIR171c,lja-MIR171d,csi-MIR171a,ssl-MIR171b,	gma-MIR171k	gagaaagCGATGTTGGTGAGGTTCAATCcgaagacggatttacatgtagaagcagtaaaatacgatctcagaTTGAGCCGCGCCAATATCACTttatc	gma-miR171k-3p	TTGAGCCGCGCCAATATCACT	3'	Diff	gp3	((.((((.((((((((((.(((((((((.((.((((..(((((.(((....))))))))...)).)))).))))))))).)))))))))).)))).))	98	42.9	-41.2	1	0	0	0	37	32	47	0	0	0	35.8372	40.6027	44.4823	middle
12	15	mdm-miR171a	TTGAGCCGCGTCAATATCTCC	21						10	mdm-MIR171b,gma-MIR171p,gma-MIR171n,gma-MIR171t,gma-MIR171m,stu-MIR171b,mdm-MIR171a,ppe-MIR171h,sly-MIR171e,ctr-MIR171,	mdm-MIR171a	gaaggtattgacgcgcctcaatttgaacgrgtggctyatattggagacttaaccatgcgattctgaTTGAGCCGCGTCAATATCTCC	mdm-miR171a	TTGAGCCGCGTCAATATCTCC	3'	Yes	gp3	.((.(((((((((((((.((((((..((((((((((.(((..........))).))))))).)))..)))))).))))))))))))).))...	89	45.2	-43	1	168	239.167	206	346	153.333	201.5	166.287	206.5	241.543	335.126	194.555	190.706	middle
13	16	cme-miR319c_L-1R+2_1ss6CT	TGGATTGAAGGGAGCTCCTCC	21						57	cme-MIR319c,gma-MIR319g,gma-MIR319q,gma-MIR319l,gma-MIR319i,gma-MIR319o,gma-MIR319d,ptc-MIR319g,ptc-MIR319e,ptc-MIR319h,ptc-MIR319f,ath-MIR319b,ath-MIR319c,ath-MIR319a,stu-MIR319b,stu-MIR319a,mdm-MIR319b,mdm-MIR319a,aly-MIR319b,aly-MIR319d,aly-MIR319c,aly-MIR319a,vvi-MIR319f,vvi-MIR319c,vvi-MIR319b,vvi-MIR319e,nta-MIR319b,nta-MIR319a,mes-MIR319c,mes-MIR319d,mes-MIR319f,mes-MIR319h,mes-MIR319b,mes…	cme-MIR319d	atgtaggagctctcttcggttcatctcgagacaggtggaaggtcgaaacgttgctgctcattcgttagttcaatagctcattatccatcaaatctccataatttttatatcaaagttgtgtgatgtgctcctgatctaacgatgtaggagcaatctttgatcatcgttgtcatgtaTTGGACTGAAGGGAGCTCCTtcacttttact	cme-miR319c	TTGGACTGAAGGGAGCTCCT	3'	Diff	gp3	..(((.(((((((((((((((((......(((((((....((((..(((.((((((.((.(((..((((((((.(((.(((..((((((.......((....))............((((((((.((((......))))...)))))))).))))))))).))).))))))))..))).)).)))))))))..))))...)))))))...))))))))))))))))))))..........	228	38.8	-87.4	0.9	0	0	4	127.45	389.75	493.65	0	0	4.69016	123.445	494.529	467.206	middle
14	17	aly-miR319a-3p_L+2R-1	GATTGGACTGAAGGGAGCTCCC	22						7	aly-MIR319a,mtr-MIR319a,mtr-MIR319d,stu-MIR319a,aly-MIR319b,bra-MIR319,zma-MIR319c,	aly-MIR319b	aaatgttaatatggttatagatgttgagttggtgaaggaagAGAGCTTTCTTCGGTCCACTCatggagtaatatgtgagatttaattgactctcgactcattcatccaaataccaaatgaaagaacatgttctcatatggtaaatgaatgaatgatgcgagagacaaattgagtcttcacttctctatgcTTGGACTGAAGGGAGCTCCCTatttttattttttctcggtcgtacacatttcattt	aly-miR319a-3p	TTGGACTGAAGGGAGCTCCCT	3'	Diff	gp3	..........((((((((.....((((.((((((((((.((((((.(((.(((.......(((((((((((..((.(((..((((((((.((..((.((((((................)))))).))..)).))))))))..))).))...)))))))))))......))).))).)))))).)))))))))).))))......))))))))........	203	40.7	-85.7	1	0	0	0	16.7	162	210.9	0	0	0	16.1752	205.551	199.603	middle
15	18	mdm-miR390a	AAGCTCAGGAGGGATAGCGCC	21						66	mdm-MIR390c,ppt-MIR390b,ppt-MIR390a,ppt-MIR390c,mtr-MIR390,gma-MIR390c,gma-MIR390g,gma-MIR390a,gma-MIR390f,gma-MIR390e,gma-MIR390d,gma-MIR390b,ptc-MIR390a,ptc-MIR390b,ptc-MIR390d,ptc-MIR390c,ath-MIR390a,ath-MIR390b,stu-MIR390,mdm-MIR390d,mdm-MIR390a,mdm-MIR390e,mdm-MIR390f,mdm-MIR390b,aly-MIR390a,aly-MIR390b,ppe-MIR390,vvi-MIR390,nta-MIR390b,nta-MIR390c,nta-MIR390a,lus-MIR390c,lus-MIR390a,lus-MIR…	mdm-MIR390b	gtgtggaagaatctgttAAGCTCAGGAGGGATAGCGCCattctcggtttggtttaaccacatatagcgctatccatcctgagtttcatggcttcttcttacac	mdm-miR390a	AAGCTCAGGAGGGATAGCGCC	5'	Yes	gp3	(((((.((((((.(..(.((((((((((.(((((((..(((((((....((((((.....(((........)))..))))))..)))))))..))))))).)))))))))).)..).)))))))))))	128	40.6	-54.8	1.1	1599.5	2209.5	2395.5	2094.5	1834	2143.5	1583.19	1907.71	2808.82	2028.68	2327.04	2028.68	high
15	19	ptc-miR390d-3p_2ss1CT17TC	TGCTATCCATCCTGAGCTTTA	21						66	mdm-MIR390c,ppt-MIR390b,ppt-MIR390a,ppt-MIR390c,mtr-MIR390,gma-MIR390c,gma-MIR390g,gma-MIR390a,gma-MIR390f,gma-MIR390e,gma-MIR390d,gma-MIR390b,ptc-MIR390a,ptc-MIR390b,ptc-MIR390d,ptc-MIR390c,ath-MIR390a,ath-MIR390b,stu-MIR390,mdm-MIR390d,mdm-MIR390a,mdm-MIR390e,mdm-MIR390f,mdm-MIR390b,aly-MIR390a,aly-MIR390b,ppe-MIR390,vvi-MIR390,nta-MIR390b,nta-MIR390c,nta-MIR390a,lus-MIR390c,lus-MIR390a,lus-MIR…	ptc-MIR390d	agaatctgttAAGCTCAGGAGGGATAGCGCCctaaggataaccatgggctctttttatttggtttttgactatcagtggCGCTATCCATCCTGAGTTTTActggtt	ptc-miR390d-3p	CGCTATCCATCCTGAGTTTTA	3'	Diff	gp3	(((((.((((((.(..(.((((((((((.(((((((..(((((((....((((((.....(((........)))..))))))..)))))))..))))))).)))))))))).)..).)))))))))))	128	40.6	-54.8	1.1	0	0	0	27	6.5	3	0	0	0	26.1515	8.24743	2.8393	middle
16	20	ptc-miR390a	AAGCTCAGGAGGGATAGCGCC	21						15	ptc-MIR390d,gma-MIR390c,gma-MIR390a,ath-MIR390a,ath-MIR390b,stu-MIR390,aly-MIR390a,aly-MIR390b,mes-MIR390,bra-MIR390,bna-MIR390b,sly-MIR390b,sly-MIR390a,lja-MIR390b,lja-MIR390a,	ptc-MIR390d	agaatctgttAAGCTCAGGAGGGATAGCGCCctaaggataaccatgggctctttttatttggtttttgactatcagtggCGCTATCCATCCTGAGTTTTActggtt	ptc-miR390a	AAGCTCAGGAGGGATAGCGCC	5'	Yes	gp3	..((((.((.((((((((((.((((((((((((.((...((((((..(.....)..)..))))).....))...)).)))))))))).)))))))))).)).))))	104	43.4	-44.2	1	1599.5	2209.5	2395.5	2094.5	1834	2143.5	1583.19	1907.71	2808.82	2028.68	2327.04	2028.68	high
16	19	ptc-miR390d-3p_2ss1CT17TC	TGCTATCCATCCTGAGCTTTA	21						15	ptc-MIR390d,gma-MIR390c,gma-MIR390a,ath-MIR390a,ath-MIR390b,stu-MIR390,aly-MIR390a,aly-MIR390b,mes-MIR390,bra-MIR390,bna-MIR390b,sly-MIR390b,sly-MIR390a,lja-MIR390b,lja-MIR390a,	ptc-MIR390d	agaatctgttAAGCTCAGGAGGGATAGCGCCctaaggataaccatgggctctttttatttggtttttgactatcagtggCGCTATCCATCCTGAGTTTTActggtt	ptc-miR390d-3p	CGCTATCCATCCTGAGTTTTA	3'	Diff	gp3	..((((.((.((((((((((.((((((((((((.((...((((((..(.....)..)..))))).....))...)).)))))))))).)))))))))).)).))))	104	43.4	-44.2	1	0	0	0	27	6.5	3	0	0	0	26.1515	8.24743	2.8393	middle
17	21	mdm-miR391_1ss21GT	TACGCAGGAGAGATGACGCCT	21						2	mdm-MIR391,gma-MIR4376,	mdm-MIR391	gggaggttcgcTACGCAGGAGAGATGACGCCGacagtcatgttcttagtattaggattagaacgacggcgtcatctctcctgcataggaaaccttgc	mdm-miR391	TACGCAGGAGAGATGACGCCG	5'	Diff	gp3	..((((((..(((.((((((((((((((((((....((..(((((.......)))))..))....)))))))))))))))))).)))..))))))..	93	51.5	-52.2	1	0	10	0	1522.75	986.25	1097.25	0	8.63414	0	1474.9	1251.39	1038.47	middle
18	22	aly-miR393a-5p	TCCAAAGGGATCGCATTGATCC	22						38	aly-MIR393b,mtr-MIR393a,mtr-MIR393b,gma-MIR393g,gma-MIR393c,gma-MIR393e,gma-MIR393a,gma-MIR393d,gma-MIR393f,ptc-MIR393a,ptc-MIR393b,ath-MIR393b,ath-MIR393a,stu-MIR393,aly-MIR393a,ppe-MIR393a,vvi-MIR393a,vvi-MIR393b,mes-MIR393b,mes-MIR393a,atr-MIR393,lus-MIR393a,lus-MIR393c,cme-MIR393b,cme-MIR393c,cme-MIR393a,bna-MIR393,tcc-MIR393a,tcc-MIR393b,cpa-MIR393,csi-MIR393,htu-MIR393a,htu-MIR393c,htu-MIR3…	aly-MIR393a	agcaactagaggaaggaTCCAAAGGGATCGCATTGATCCtaataaaggtgaattaccccaatcttttcttaataattagcaaacaaatcaaaaaaatttgcttggttttggATCATGCTATCTCTTTGGATTcatccttcggtagct	aly-miR393a-5p	TCCAAAGGGATCGCATTGATCC	5'	Yes	gp3	(((.(((((((((...(((((((((((((((((.(((((.....((((..((.............((((.(((((..((.........))..))))).)))).............))..))))........))))))))))))))))))))))...))))))))).)))	169	33.7	-54.4	1	0	0	11	0	2.5	0	0	0	12.8979	0	3.17209	0	middle
19	23	gma-miR393a_R+1	TCCAAAGGGATCGCATTGATCC	22						7	gma-MIR393a,mtr-MIR393b,gma-MIR393g,gma-MIR393c,gma-MIR393e,gma-MIR393d,gma-MIR393f,	gma-MIR393f	ggaggaggcaTCCAAAGGGATCGCATTGATCccaaatccaagctttaatatttttctctcttctcactcaataatattaatttaTTTGGGATCATGCTATCCCTTtggatttctcctt	gma-miR393a	TCCAAAGGGATCGCATTGATC	5'	Diff	gp3	.((((((..((((((((((((.((((.((((((((((..((.....((((((....................))))))..))..)))))))))))))).))))))))))))..)))))).	118	39.2	-48.3	1	0	0	11	0	2.5	0	0	0	12.8979	0	3.17209	0	middle
20	24	gma-miR394a-5p_1ss1TC	CTGGCATTCTGTCCACCTCC	20						50	gma-MIR394a,gma-MIR394g,gma-MIR394d,gma-MIR394f,gma-MIR394b,gma-MIR394e,gma-MIR394c,ptc-MIR394a,ptc-MIR394b,ath-MIR394b,ath-MIR394a,stu-MIR384,mdm-MIR394b,mdm-MIR394a,aly-MIR394b,aly-MIR394a,ppe-MIR394a,ppe-MIR394b,vvi-MIR394a,vvi-MIR394b,vvi-MIR394c,nta-MIR394,mes-MIR394c,mes-MIR394a,mes-MIR394b,atr-MIR394,lus-MIR394b,lus-MIR394a,cme-MIR394a,cme-MIR394b,bna-MIR394b,bna-MIR394a,tcc-MIR394a,tcc-MI…	gma-MIR394c	cagagtttcTTGGCATTCTGTCCACCTCCacttccactttcagttccatggatctctctctctttttggccctatctacgtactcggaggtggacatactgccaatagag	gma-miR394a-5p	TTGGCATTCTGTCCACCTCC	5'	Diff	gp3	(((((((((((((..((((((((.((((((((((((((((((((...((((((((((((.(((.............................)))..))))))))))))...)))))).)))))))))))))).))))))))..)))))))))))))	157	44.6	-78.2	1.1	321.736	207.556	47.5556	4974.78	3992.25	3341.18	318.456	179.206	55.7607	4818.44	5065.51	3162.2	high
21	25	sbi-miR396c_R+2	TTCCACAGCTTTCTTGAACTTTT	23						114	sbi-MIR396c,pab-MIR396a,pab-MIR396b,pab-MIR396c,pta-MIR396,pde-MIR396,smo-MIR396,mtr-MIR396a,mtr-MIR396b,gma-MIR396c,gma-MIR396g,gma-MIR396b,gma-MIR396f,gma-MIR396d,gma-MIR396k,gma-MIR396i,gma-MIR396e,gma-MIR396a,gma-MIR396h,ptc-MIR396e,ptc-MIR396c,ptc-MIR396b,ptc-MIR396a,ptc-MIR396f,ptc-MIR396g,ptc-MIR396d,ath-MIR396b,ath-MIR396a,stu-MIR396,mdm-MIR396b,mdm-MIR396g,mdm-MIR396f,mdm-MIR396a,aly-MIR…	sbi-MIR396c	ttcaagtccatgccatgcctTTCCACAGCTTTCTTGAACTTctcctcctcctcctctctcttagaagggtagctttgaacatctctctctctctctctctctctctctctctctctccaaagaaggtcaagaaagctgtgggaagaaatgacataacaagga	sbi-miR396c	TTCCACAGCTTTCTTGAACTT	5'	Diff	gp3	......((((((.(((..(((((((((((((((((((.(((((.......((((..((.....))..)).))....((.....))...................................))))).)))))))))))))))))))..))).))).....)))	156	45.7	-45.4	0.6	46	14	4	99.5	42	67	45.531	12.0878	4.69016	96.3731	53.2911	63.4109	middle
22	26	gma-miR396a-5p_L+3_1ss24GT	ATCTTCCACAGCTTTCTTGAACTT	24						2	gma-MIR396e,gma-MIR396h,	gma-MIR396h	gaatggtctttttcgtgatcTTCCACAGCTTTCTTGAACTGtgttgtgtgaggtttctccaagtgaaggtttaagatcccttatgcaacataaattctttgagcacaATTCAAGATAGCTGTGGAAAAtcactgagatgatctcgttc	gma-miR396a-5p	TTCCACAGCTTTCTTGAACTG	5'	Diff	gp3	(((((.((((((((((.(((((((.((((((..(((..((((.....(((..(((....))).))).....)))).)))....)))))).))))))).)))))))))).)))))	114	39.5	-44	1	5	0	4	108	38	71	4.94902	0	4.69016	104.606	48.2158	67.1967	middle
23	27	dpr-miR397_R+2	CCATTGAGTGCAGCGTTGATGAT	23						29	dpr-MIR397,pab-MIR397,mtr-MIR397,gma-MIR397a,gma-MIR397b,ptc-MIR397b,ptc-MIR397a,ath-MIR397a,aly-MIR397a,aly-MIR397b,ppe-MIR397,vvi-MIR397a,nta-MIR397,atr-MIR397b,lus-MIR397b,lus-MIR397a,cme-MIR397,bna-MIR397a,bna-MIR397b,tcc-MIR397,sly-MIR397,rco-MIR397,lja-MIR397,csi-MIR397,ssl-MIR397,osa-MIR397a,osa-MIR397b,bdi-MIR397a,sbi-MIR397,	dpr-MIR397	ttaaaaacgCCATTGAGTGCAGCGTTGATGatattgcatttgttcgatctctttagtcctgatttatcgattgttatatcgtcaatgctgcacttaataacgtttttaa	dpr-miR397	CCATTGAGTGCAGCGTTGATG	5'	Diff	gp3	(((((((((..(((((((((((((((((((((((..((.(((...((((...........))))...))).))..)))))))))))))))))))))))..)))))))))	109	33.9	-48.5	1.3	4673.17	12448.3	7256.17	66.5	28	30	4625.52	10748.1	8508.14	64.4101	35.5274	28.393	high
24	28	mdm-miR397a_L+2R-2	CATTGAGTGCAGCGTTGATGA	21						3	mdm-MIR397a,mdm-MIR397b,mes-MIR397,	mdm-MIR397b	ccagattgaagaaacatcaTTGAGTGCAGCGTTGATGAAAgttcgtattgcttctgaatcttcattaggacatcgaaacatttcatcaacgctgcacccaattatgtttctatccattttgg	mdm-miR397a	TTGAGTGCAGCGTTGATGAAA	5'	Diff	gp3	((((((((.((((.(((((..(((((((((((((((.((.(((...((....))...))).))))))..)))))))))))..))))).)))).))))))))	101	41.6	-41.7	1	4.66667	16.3333	14.6667	0	0	5	4.61908	14.1024	17.1972	0	0	4.73216	middle
25	29	sbi-miR397-5p_R+1_1ss1TC	CCATTGAGTGCAGCGTTGATGA	22						2	tae-MIR397,sbi-MIR397,	sbi-MIR397	TCATTGAGTGCAGCGTTGATGagccagctggccggccagccgtgcgtccgccgccggcgccggccacggcTCACCGGCGCTGCACTCAATT	sbi-miR397-5p	TCATTGAGTGCAGCGTTGATG	5'	Diff	gp3	.(((.(((((.(((((.((((((((..(.((((((((((((((((....))))))))).))))))).)..)))))))).))))).))))).)))	93	64.9	-68	1.1	319.167	969.333	688.167	2.5	0	0	315.912	836.936	806.902	2.42143	0	0	middle
26	30	mdm-miR408a_L-1R+2_1ss21CT	TGCACTGCCTCTTCCCTGGTTT	22						3	mdm-MIR408a,mdm-MIR408b,mdm-MIR408d,	mdm-MIR408a	ggaaagagagttaataagACAGGGAAGAGGTAGAGCATGgatggagttctcaagagcaaaatagagctcttgtgactctactcATGCACTGCCTCTTCCCTGGCtttgcctccctctccttcc	mdm-miR408a	ATGCACTGCCTCTTCCCTGGC	3'	Diff	gp3	((((.(((((.....(((.((((((((((((((.(((((..(((((((..(((((((........))))))).)))))))..))))).)))))))))))))).))).......))))).))))	123	48.8	-70.1	1.2	12.5	14	20	0	0	0	12.3725	12.0878	23.4508	0	0	0	middle
27	31	ppt-miR477a-5p_L+1R+1	ACTCTCCCTCAAAGGCTTCCAA	22						8	ppt-MIR477a,ppt-MIR477c,ppt-MIR477d,ppt-MIR477b,ppt-MIR477e,ppt-MIR477h,ppe-MIR477,aqc-MIR477f,	ppt-MIR477e	gatgagaagattccgaaaggcggttgcttatctCTCTCCCTCAAAGGCTTCCAacatcaggtgtagaagccttgctagaagcctttgtgggagagggggaaacaaacgccttgcattattgccgttc	ppt-miR477a-5p	CTCTCCCTCAAAGGCTTCCA	5'	Diff	gp3	..((.(((((((((((((.((((((((((.(((.((.((.((....))))))..))).)))))))))).))))))))))))).))	83	47.1	-47.2	1.2	37.5	43	0	49.5	26.5	32.5	37.1176	37.1268	0	47.9444	33.6241	30.759	middle
28	32	mes-miR477f_L+1R+1_1ss2AC	ACTCTCCCTCAAAGGCTTCCAA	22						4	mes-MIR477f,ptc-MIR477d,vvi-MIR477a,mes-MIR477g,	mes-MIR477g	gacactgacattgctagaatggttagagaagcttccaATCTCCCTCAAAGGCTTCCAatattccaggccatggaaatgttggagacctttggaggggattgaaggcttactctcccatcatttaatgcaagcatagtttc	mes-miR477f	ATCTCCCTCAAAGGCTTCCA	5'	Diff	gp3	...((((((((..((((((((.((((((((((((((.((((.(((..((((....))))..)))..)))).)))))))))))))).))))))))...)))).))))...	103	41.3	-51.2	1.1	37.5	43	0	49.5	26.5	32.5	37.1176	37.1268	0	47.9444	33.6241	30.759	middle
29	33	ptc-miR477a-5p_L-1_1ss2TA	ACTCCCTCAGAGGCTTCCAA	20						2	ptc-MIR477a,ptc-MIR477b,	ptc-MIR477b	caATCTCCCTCAGAGGCTTCCAAtatctcagtttatagtaattgcttcaaataatgagaatgttggatgcctttgggtgagattg	ptc-miR477a-5p	ATCTCCCTCAGAGGCTTCCAA	5'	Diff	gp3	(((((((((((((((((.(((((((((((.((((..(((....)))..))))...))).)))))))).)))))))))))))))))	85	41.2	-45.6	1.3	0	0	10	13	5	11	0	0	11.7254	12.5915	6.34418	10.4108	middle
30	34	pab-miR482c_1ss11TG	TCTTTCCTACGCCTCCCATTCC	22						26	pab-MIR482c,pab-MIR482a,pab-MIR482b,pta-MIR482b,pta-MIR482a,pta-MIR482c,pde-MIR482a,pde-MIR482b,gma-MIR482c,gma-MIR482a,gra-MIR482,stu-MIR482a,stu-MIR482e,mdm-MIR482b,mdm-MIR482d,mdm-MIR482a,vvi-MIR482,nta-MIR482c,nta-MIR482a,ghr-MIR482a,sly-MIR482e,sly-MIR482a,sly-MIR482c,csi-MIR482a,vun-MIR482,pvu-MIR482,	pab-MIR482c	tgagaagggaatggatgtgttttgtggatggaagtcttgaggagtgggagcagaggataagactgctgctttgaatattatcagTCTTTCCTACTCCTCCCATTCCtattggcttcaccacacatcccttcccaacg	pab-miR482c	TCTTTCCTACTCCTCCCATTCC	3'	Diff	gp3	......(((((.((((((.....((((...((((((...(((((((((((.((((((.(((((((.((..........)).))))))))))).)).)))))))))))...)))))).)))))))))).)))))....	127	46.7	-63.4	1	18178	9717	2058	18839	7912	17758	17992.7	8389.8	2413.09	18247	10039	16806.7	high
31	35	pab-miR535_L+2	TCTGACAACGAGAGAGAGCACGC	23						8	pab-MIR535,mdm-MIR535a,ppe-MIR535a,vvi-MIR535a,vvi-MIR535b,vvi-MIR535c,mes-MIR535a,atr-MIR535,	pab-MIR535	aaatatccgttctattccattgcTGACAACGAGAGAGAGCACGCctgtattctcttatatgaattttgcatatgtgggcgtccatgcgtgctctctgcttgtagtcagcaaagcgactgcatctcaact	pab-miR535	TGACAACGAGAGAGAGCACGC	5'	Diff	gp3	.......((((........((((((((.((((((((((((((((.((.(..(((..(((((.......)))))..)))..).)).))))))))))).))))).))))))))))))..............	108	45	-48.1	0.8	47	47	7	23	14	5	46.5208	40.5805	8.20777	22.2772	17.7637	4.73216	middle
32	36	aly-miR858-5p_L-1R+1	TTCGTTGTCTGTTCGACCTTA	21						6	aly-MIR858,ath-MIR858b,ath-MIR858a,mdm-MIR858,ppe-MIR858,cme-MIR858,	aly-MIR858	agagtgattggattcgatgctaggcttgacaaagtgagcaatcttatgtgttctcatctttgTTTCGTTGTCTGTTCGACCTTggtctcgatctctccttaaaaccctaatacgttatcgtttatttcattcatctatccttcttatgatcatcatacatggtatcggtttatgattgatggggtagatagatgatcgaaacttttgatttctgaggctttttttttttttttaaacatttagtataccagatattactagtacacacatacatactgacacgatagtctatttgatgattaagtctttacgttcgtatacatacggatttccctttcttttgcataaaatcttagattatcgtaggcatgcggatttacaataagaaagatgattgtc…	aly-miR858-5p	TTTCGTTGTCTGTTCGACCTT	5'	Diff	gp3	(((((..((((((((..(((...(((((.(((((.(((...(((..((.((((.((((((..((((((((((((((((((((((((...((....)).........((...((((((.((((((((((..(((((((((..((..((((((((...((.((....))))..)))))).))..))..)))))))))..))))...............(((((((((((((..........((((((((.(((((...(((.(((......)))...((..((((...((((((.(((((((..(((((((((.((((((....))))))..(((......((((((.....(((((((((.(((((((((..((..(((........)))..))..))))…	938	32.9	-237.2	0.8	340	146	280	439	224	239	336.533	126.059	328.311	425.204	284.219	226.197	middle
33	37	ppt-miR1030h_1ss2CT	TTTGCATCTGCACCTGCACCG	21						9	ppt-MIR1030h,ppt-MIR1030g,ppt-MIR1030d,ppt-MIR1030f,ppt-MIR1030b,ppt-MIR1030a,ppt-MIR1030e,ppt-MIR1030c,ppt-MIR1030i,	ppt-MIR1030h	gctacgttacctaTCTGCATCTGCACCTGCACCGagattcgaagagtaatgaagaatcatatacgcagttgcagtcatttccagttcatcactggacctgacaaattgaagcaatgatgcaattctcattctcgcttatcggtgcagtgcttatgcagatatgtggcgttg	ppt-miR1030h	TCTGCATCTGCACCTGCACCG	5'	Diff	gp3	...(((..((.(((((((((..(((.(((((((((....(((.((((...(((..(((((.....(((((...((((..((((((.....))))))..)))).))))).....)))))....)))..)))))))....))))))))))))..))))))))).))..)))..	166	44.4	-68.6	0.9	761	943	979	1595	1074	1508	753.241	814.2	1147.92	1544.87	1362.73	1427.22	middle
34	38	pta-miR1314_R-2_1ss5CT	TCGGTCTTGAATGTTAGGAG	20						1	pta-MIR1314,	pta-MIR1314	aattccaattccaattgataacatgttagttagctgaagagattcttcaacattagaggccaatatagaataatattcttattcttaaTCGGCCTTGAATGTTAGGAGAAcgttttcctctacctaagcatgctatctcaaaggagtttaaggagtgg	pta-miR1314	TCGGCCTTGAATGTTAGGAGAA	3'	Diff	gp3	.(((((((((((....((((.((((((((.(((..(((((..((((((((((((..(((((.....(((((((.....))))))).....)))))..)))))).))))))..)))))..))).)))).)))).)))).....))))))...)))))..	155	34.8	-53.2	1	0	0	12	0	0	7	0	0	14.0705	0	0	6.62502	middle
35	39	lja-miR1507a_R+1	TCTTCCATCCATACATCATCTA	22						3	lja-MIR1507a,lja-MIR1507b,ptc-MIR477b,	lja-MIR1507a	aaggcaatgtttggtagaggtgtatggctggaaaaaagaaaaggcttctctggtcatttggagatgcttttcttTCTTCCATCCATACATCATCTaacaaactgagtttt	lja-miR1507a	TCTTCCATCCATACATCATCT	3'	Diff	gp3	...((...(((((.(((((((((((((.(((((.(((((((((.(.((((..(....)..)))).)))))))))).))))).))))))))).)))).)))))...))...	104	38.2	-47.3	1.1	32	39	56	21	34	26	31.6737	33.6732	65.6622	20.34	43.1404	24.6072	middle
36	40	gma-miR1510a-3p_L-1R-1_1ss20AT	TGTTGTTTTACCTATTCCTCC	21						4	gma-MIR1510a,gma-MIR1510b,gso-MIR1510a,gso-MIR1510b,	gma-MIR1510a	ttatggaactggAGGGATAGGTAAAACAATGACTGCtgtataagtaattgttatagttagTTGTTGTTTTACCTATTCCACCCattccatgta	gma-miR1510a-3p	TTGTTGTTTTACCTATTCCACCC	3'	Diff	gp3	.(((((((..((.((((((((((((((((..((((((((((((....))).))))).))))..)))))))))))))))).))..)))))))..	90	34.4	-46.3	1.4	0	0	5	0	0	0	0	0	5.86269	0	0	0	low
37	41	gma-miR1511_R+1	AACCAGGCTCTGATACCATGA	21						2	gma-MIR1511,ptc-MIR477b,	gma-MIR1511	tcagccgtggtatcaggtcctgcttcatcaagtggtcttgtgttcaaatccagcctcaagcacatggttAACCAGGCTCTGATACCATGgtgaatataa	gma-miR1511	AACCAGGCTCTGATACCATG	3'	Diff	gp3	(((.((((((((((((..((((.((.((((.(((..((((.(((.......)))..))))))).)))).)).))))..)))))))))))))))......	93	46.5	-38.6	0.8	34	37	107	21	39	30	33.6533	31.9463	125.462	20.34	49.4846	28.393	middle
38	42	mtr-miR2119_1ss2CA	TAAAAGGGAGGTGTGGAGTAG	21						2	mtr-MIR2119,ptc-MIR477b,	mtr-MIR2119	tttattttttttacactaagatactccctactttcctttgattggaaataaagagagacaaaaaggtaaatttaatttctcttcttatgtcaaTCAAAGGGAGGTGTGGAGTAGaggtgtaaaaagtaaa	mtr-miR2119	TCAAAGGGAGGTGTGGAGTAG	3'	Diff	gp3	......(((((((((((....((((((..((((((((((((((((..((((..(((((...(((......)))....)))))..)))).))))))))))))))))..))))))..)))))))))))....	120	30	-48.6	1.2	0	7	5	6	0	0	0	6.0439	5.86269	5.81144	0	0	low
39	43	mtr-miR2199_1ss17AG	TGATACACTAGCACGGGTCAC	21						1	mtr-MIR2199,	mtr-MIR2199	atatgtgctgtgcaattgtgatccgttctagtgtatcatacaattcacagcttaatattgattaattccagtttattaatttggaatatatatcttttgatagaggcctaggtcactaattttcttgttttaatatatttaagaaaatatcatatgatatcttcatctttgctttctatatcacttatataattaacatgttagctacatagatctatgcaatacagtaattaaatatcatattacaaaatatcaaattcatacgttctttttcctttgtttttggttggttgagaaatcactaccattttttgttgatacatataattagaaaacaagtatatacatatatcaagattaaccgtatagtttaatggcctttatatgaaaatttttatg…	mtr-miR2199	TGATACACTAGCACGGATCAC	3'	Diff	gp3	.((((((....((((..(((((((((.(((((((((((....((((.((((((....(..(.((.((((((((((.......((((((((.........(((((((((......((((........(((((.((((((....(((.(((((....))))).)))...((((.((((((...........((((((...((((.((.............))))))...))))))..(((((....((((((.((((((..((................))..))))))(((((((....)))..))))..)))))))))))........)))))).)))).......)))))).)))))........)))).....)))))))))...........))))…	477	28	-120.9	0.9	0	0	10	0	0	0	0	0	11.7254	0	0	0	middle
40	44	atr-miR2950_1ss20GA	TTCCATCTCTTGCACACTGAA	21						3	atr-MIR2950,vvi-MIR2950,mes-MIR2950,	atr-MIR2950	ttgtggtttaTTCCATCTCTTGCACACTGGAccagtgcttcagcaactggttggtgtgcagggggtggaatatggcaccc	atr-miR2950	TTCCATCTCTTGCACACTGGA	5'	Diff	gp3	..(((...(((((((((((((((((((..(.(((((((....)).))))))..)))))))))))))))))))...)))..	76	52.5	-47.2	1.1	5	10	4	30.5	30	35	4.94902	8.63414	4.69016	29.5415	38.0651	33.1251	middle
41	45	vvi-miR2950-5p_1ss20GA	TTCCATCTCTTGCACACTGAA	21						2	ghr-MIR2950,vvi-MIR2950,	vvi-MIR2950	tggcttacatgggcttgtgatgtaTTCCATCTCTTGCACACTGGAccagcgctccagctgcagttTGGTGTGCACGGGATGGAATAcatcatggattcatgatgtgg	vvi-miR2950-5p	TTCCATCTCTTGCACACTGGA	5'	Diff	gp3	(((((....(((...(((((((((((((((((((..(.(((((((((.....))))))).........)))..)))))))))))))))))))...))).....)))))	108	44.4	-48.8	1	5	10	4	30.5	30	35	4.94902	8.63414	4.69016	29.5415	38.0651	33.1251	middle
42	46	gma-miR4415a-3p_1ss18AT	TTGATTCTCATCACAACTTGG	21						2	gma-MIR4415a,gma-MIR4415b,	gma-MIR4415b	ggctgcatcAAGTTGTGATGGGAATCAATGGCAgcaatcacgccaagaaaatgaaatcccattatcttctcacagtatatcattaattaggctaactggtgttgacggatataaatccattactgccaTTGATTCTCATCACAACATGGtccagtc	gma-miR4415a-3p	TTGATTCTCATCACAACATGG	3'	Diff	gp3	..((((...((.((((((((((((((((((((((......(((((((.(((((((.................)))))))..................(((..((....))..)))..)))))))...((((....)))).....)))))))))))))))))))))).))...))))	174	38.1	-57.5	0.9	36.5	41.5	68	38.5	46.5	37.5	36.1278	35.8317	79.7326	37.2901	59.0009	35.4912	middle
43	46	gma-miR4415a-3p_1ss18AT	TTGATTCTCATCACAACTTGG	21						2	gma-MIR4415a,gma-MIR4415b,	gma-MIR4415b	ggctgcatcAAGTTGTGATGGGAATCAATGGCAgcaatcacgccaagaaaatgaaatcccattatcttctcacagtatatcattaattaggctaactggtgttgacggatataaatccattactgccaTTGATTCTCATCACAACATGGtccagtc	gma-miR4415a-3p	TTGATTCTCATCACAACATGG	3'	Diff	gp3	..((((...((.((((((((((((((((((((((......(((((((.(((((((.................)))))))..................(((..((....))..)))..)))))))...((((....)))).....)))))))))))))))))))))).))...))))	174	38.1	-57.5	0.9	36.5	41.5	68	38.5	46.5	37.5	36.1278	35.8317	79.7326	37.2901	59.0009	35.4912	middle
44	47	ath-miR5021_R-1_1ss1TA	AGAGAAGAAGAAGAAGAAA	19						1	ath-MIR5021,	ath-MIR5021	gtagtgatgatgaatttgagatttgggagagggagaggatTGAGAAGAAGAAGAAGAAAAgagtgatttgagagttcatgggtcttgaaagattttagtgactttcgttatcttccttgttgttgttcttcttctctaataagttcttcaatggagttttgtcgtctctat	ath-miR5021	TGAGAAGAAGAAGAAGAAAA	5'	Diff	gp3	((((.((((((......(((((((....((((((....((((((((((((((.((.(((((...(((.(((((((.(((..((((....))))....))))))))))..)))...))).)).)).))))))))))).)))...))))))....))))))))))))).))))	171	36.3	-47.1	0.8	0	0	0	0	5	0	0	0	0	0	6.34418	0	low
45	48	bdi-miR5059_L-2	GCCTGGGCAGCACCACCA	18						1	bdi-MIR5059,	bdi-MIR5059	tactgaacaaCGGCCTGGGCAGCACCACCAgcttctccatcgaagttggtactgccgccatagcctcctcgtcctc	bdi-miR5059	CGGCCTGGGCAGCACCACCA	5'	Diff	gp3	...........(((...(((.(((..(((((((((......)))))))))..))).)))...)))...........	54	59.2	-28.6	0.6	35	36	118	22	6	31	34.6431	31.0829	138.36	21.3086	7.61301	29.3394	middle
46	49	rgl-miR5139_L-1_1ss7GC	AACCTCGCTCTGATACCA	18						2	rgl-MIR5139,cpa-MIR8155,	rgl-MIR5139	agttatatcaAAACCTGGCTCTGATACCAagaggaattgatgatctttattcatgaaaagagagaactatatatagatatacaacgatatgtcgaagacgaaatttttatctcaatatggggttattagaccaactttgggtggca	rgl-miR5139	AAACCTGGCTCTGATACCA	5'	Diff	gp3	.(..((....(((..(((.(((((((((........((.((((.......)))).))..((((............((((((......))))))................)))).......)).))))))))))..)))..))..).	144	33.6	-23.6	0.5	22.3333	25.3333	20.3333	5	0	2	22.1056	21.8732	23.8416	4.84287	0	1.89286	middle
47	50	mtr-miR5225b_L-1R-2_1ss17AG	CGCAGGAGAGATGACGCCT	19						2	mtr-MIR5225b,mtr-MIR5225c,	mtr-MIR5225b	gggactttagTCGCAGGAGAGATGACACCTTCtattactaatgacatgattttatagcaattttaacagaagttgtcatctttctttgactgaagttca	mtr-miR5225b	TCGCAGGAGAGATGACACCTTC	5'	Diff	gp3	.((((((((((((.(((((((((((((.(((((.(((....((..(((....)))..))....))).))))).))))))))))))))))))))))))).	97	35.4	-40.4	1.2	0	0	0	1.75	1.25	1.25	0	0	0	1.695	1.58604	1.18304	low
48	51	cca-miR6111-5p	TCTTTATGTCACGATGTATGAC	22						1	cca-MIR6111,	cca-MIR6111	ttggagcTCTTTATGTCACGATGTATGACtctttgttactggttccaaaggattatgaaggtagtctagcccacagacaacataaatgcatatcttgagacatcagttcacatgagactcgtgcctccaacaatggattgttcgagtctcacgtgagaacccgatgtctcaagataggtgttggtgttgtgcgtgggttagcttatcatcataatcctttgtcatcgcaacaaggagtCATGCATGGTGATATAAATAGCcctaaca	cca-miR6111-5p	TCTTTATGTCACGATGTATGAC	5'	Yes	gp3	..((.(((.((((((((((.(((((((((((((((((..((((..(((((((((((((.((((..(((((((((..((((((..((..(.((((((((((((((..(((((.(((((((((..(.((((....))))..)..))))))))).))))).....)))))))))))))).)..))..))))))..)))))))))..)))).)))))))))))))..)))).))))))))))))))))).)))))))))).))))).....	260	42.7	-145.2	1.3	0	0	43	0	0	0	0	0	50.4192	0	0	0	middle
49	52	cca-miR6113_1ss21TC	TCTGAAACTCAAGAACACGTCG	22						1	cca-MIR6113,	cca-MIR6113	gtcaccTCTGAAACTCAAGAACACGTTGtcgacctacagattctgtaacaatacgatgtgttcttgagtttcgatgcgacg	cca-miR6113	TCTGAAACTCAAGAACACGTTG	5'	Diff	gp3	(((...((.((((((((((((((((((((.....(((((...))))).....))))))))))))))))))))))...))).	80	44.4	-36.2	1	0	0	8	0	0	0	0	0	9.38031	0	0	0	low
50	53	gma-miR6300_1ss2TA	GACGTTGTAGTATAGTGG	18						1	gma-MIR6300,	gma-MIR6300	aggtaaaaatacttaccactatattacaacaacttgtttgtgaaattcaatggtaattttaaataataaatgttttaatattaccgatagcatttgattatatttttgttttaaagttacatttgattatatcgctatcggctataatgtaagtcatattcatccaatatcatgcaacttttttgtatagatatattaatattactcgataatcatcaaGTCGTTGTAGTATAGTGGtaagtattcccgcc	gma-miR6300	GTCGTTGTAGTATAGTGG	3'	Diff	gp3	.(((...(((((((((((((((((((((((.(((((...((((...((...((((((.((((.......(((.....((((((((((((((((.((((((......(((.........)))..)))))).)).))))))))...))))))....))).........(((((((((((.....)))))).))))).)))).)))))).))...))))))))).)))))))))))))))))))))))...)))	250	25.9	-72	1.1	0	0	7	0	0	0	0	0	8.20777	0	0	0	low
51	54	lja-miR7516-5p	TAGCGGGTGTCTTCGCCTCTGA	22						2	lja-MIR7516,ptc-MIR477b,	lja-MIR7516	gccgttcaattttggtcgcgagtaaaattgTAGCGGGTGTCTTCGCCTCTGAacctttgcctattgtgctgttaaccattctcagcctggcttcAGAGACGTGACTCCCGCTACGcatttgctcgccatctctgctgc	lja-miR7516-5p	TAGCGGGTGTCTTCGCCTCTGA	5'	Yes	gp3	((((........)))).(((((((((..(((((((((.(((..((.(((((((.....(((......((((...........))))..)))))))))).)).))).)))))))))..)))))))))............	109	52.2	-54	0.7	0	0	9	0	8	0	0	0	10.5528	0	10.1507	0	middle
51	55	lja-miR7516-3p	AGAGACGTGACTCCCGCTACG	21						2	lja-MIR7516,ptc-MIR477b,	lja-MIR7516	gccgttcaattttggtcgcgagtaaaattgTAGCGGGTGTCTTCGCCTCTGAacctttgcctattgtgctgttaaccattctcagcctggcttcAGAGACGTGACTCCCGCTACGcatttgctcgccatctctgctgc	lja-miR7516-3p	AGAGACGTGACTCCCGCTACG	3'	Yes	gp3	((((........)))).(((((((((..(((((((((.(((..((.(((((((.....(((......((((...........))))..)))))))))).)).))).)))))))))..)))))))))............	109	52.2	-54	0.7	6	0	0	0	5	0	5.93882	0	0	0	6.34418	0	low
52	56	lja-miR7518	TTGCGCACTGAGCAAGGACAGG	22						1	lja-MIR7518,	lja-MIR7518	aagttgagcacaaagatacgcgtaatgtttttttctgtccttcttgttgttcaaagttttcattttttctttatattaagataaagaaatgtgatcactTTGCGCACTGAGCAAGGACAGGgtaaacaattatgctatagtagtttaattt	lja-miR7518	TTGCGCACTGAGCAAGGACAGG	3'	Yes	gp3	(((((((((......(((.(((((((((((...((((((((((((..((..((((((..((((..(((((((((......))))))))).))))..))))))..))..))).)))))))))..))))).)))))))))....)))))))))	151	31.1	-50.2	1.1	5	9	7	0	0	5	4.94902	7.77073	8.20777	0	0	4.73216	low
53	57	ath-miR8175_L+2	TCGATCCCCGGCAACGGCGCCA	22						2	ath-MIR8175,ptc-MIR477b,	ath-MIR8175	cttaaggcaatttgacctatatcaaatttggcaccgttgccggggatcgacccgggtcacccgcgtgacaggcgggaatacttaccacttagtacaacgacccaatatagtggtaagtattctcgcatgtcactcgggttcGATCCCCGGCAACGGCGCCAaatttgatatagctcaaatcgccttaag	ath-miR8175	GATCCCCGGCAACGGCGCCA	3'	Diff	gp3	((((((((.((((((.((((((((((((((((.(((((((((((((((((........(((((.((((((.((((((((((((((((((...................)))))))))))))))))).)))))).)))))))))))))))))))))).)))))))))))))))).)))))).))))))))	189	50.3	-127.6	1.3	0	0	5	12	14	8	0	0	5.86269	11.6229	17.7637	7.57146	middle
1	1	PC-5p-185497_5	TTCTGTGTGTTGGGATTAAAT	21	contig_1055319	+	1825	1955	tatttgcagcaTTCTGTGTGTTGGGATTAAATggcaaatgttgcgagtcaaaaagaatcggttcgttttttgtttttttaattttctgcaacatttgtcattTAATCCCAACACACAGAATGCagcaacaa	0						5'	New	gp4	...((((.(((((((((((((((((((((((((((((((((((((((...((((((((..(.......)..))))))))....))).)))))))))))))))))))))))))))))))))))).))))...	125	34.4	-70	1.6	0	2.5	0	0	0	0	0	2.15854	0	0	0	0	low
1	2	PC-3p-149282_6	TAATCCCAACACACAGAATGC	21	contig_1055319	+	1825	1955	tatttgcagcaTTCTGTGTGTTGGGATTAAATggcaaatgttgcgagtcaaaaagaatcggttcgttttttgtttttttaattttctgcaacatttgtcattTAATCCCAACACACAGAATGCagcaacaa	0						3'	New	gp4	...((((.(((((((((((((((((((((((((((((((((((((((...((((((((..(.......)..))))))))....))).)))))))))))))))))))))))))))))))))))).))))...	125	34.4	-70	1.6	0	0	0	0	0	3	0	0	0	0	0	2.8393	low
2	1	PC-5p-185497_5	TTCTGTGTGTTGGGATTAAAT	21	contig_1055319	-	1727	1866	taccttgttgctgcaTTCTGTGTGTTGGGATTAAATgacaaatgttgcagaaaattaaaaaaacaaaaaacgaaccgattctttttgactcgcaacatttgccattTAATCCCAACACACAGAATGCtgcaaataagaaa	0						5'	New	gp4	...((((((((.(((((((((((((((((((((((((.((((((((((.((...(((((((....................))))))).)))))))))))).))))))))))))))))))))))))).)))).))))...	134	34.3	-65.7	1.4	0	2.5	0	0	0	0	0	2.15854	0	0	0	0	low
2	2	PC-3p-149282_6	TAATCCCAACACACAGAATGC	21	contig_1055319	-	1727	1866	taccttgttgctgcaTTCTGTGTGTTGGGATTAAATgacaaatgttgcagaaaattaaaaaaacaaaaaacgaaccgattctttttgactcgcaacatttgccattTAATCCCAACACACAGAATGCtgcaaataagaaa	0						3'	New	gp4	...((((((((.(((((((((((((((((((((((((.((((((((((.((...(((((((....................))))))).)))))))))))).))))))))))))))))))))))))).)))).))))...	134	34.3	-65.7	1.4	0	0	0	0	0	3	0	0	0	0	0	2.8393	low
3	3	PC-5p-70886_23	TACGTACCCACAGGTTCCAG	20	contig_3299774	-	1073	1175	gtgtgggtatgctatgggTACGTACCCACAGGTCCCAGgtatggattttcatacttgggacggaccTGGGGCCTGCAGGTACGTACCcgcagcatacccaaac	0						5'	New	gp4	((.((((((((((..(((((((((((..((((((((((((......(..((....))..)...))))))))))))..)))))))))))..)))))))))).))	103	56.3	-68	1.2	0	0	0	6	3	2.5	0	0	0	5.81144	3.80651	2.36608	low
3	4	PC-3p-192901_5	TGGGGCCTGCAGGTATGTACC	21	contig_3299774	-	1073	1175	gtgtgggtatgctatgggTACGTACCCACAGGTCCCAGgtatggattttcatacttgggacggaccTGGGGCCTGCAGGTACGTACCcgcagcatacccaaac	0						3'	New	gp4	((.((((((((((..(((((((((((..((((((((((((......(..((....))..)...))))))))))))..)))))))))))..)))))))))).))	103	56.3	-68	1.2	0	0	0	5	0	0	0	0	0	4.84287	0	0	low
4	3	PC-5p-70886_23	TACGTACCCACAGGTTCCAG	20	contig_157312	-	1484	1575	ccttgggTACGTACCCACAGGCTCCAGgtatggttcgggtacagtttttcgtacccaaagcgtaccccggacctgtaggtacatacccacaa	0						5'	New	gp4	...((((((.(((((.(((((.(((.((((((.((.((((((........)))))).)).))))))..)))))))).))))).))))))...	86	54.3	-49.9	1	0	0	0	6	3	2.5	0	0	0	5.81144	3.80651	2.36608	low
5	5	PC-5p-150198_6	TTGCTTGCAACACCCCTTATG	21	contig_3266448	-	488	634	cccatagtcctagtagaagTTGCTTGCAACACCCCTTATGcaatatgttcaaagcacaaaggcaaattaaaaaagggttatcaaaaggcttcaaattgaacatattgcaTAAGGGGCATTGCAAGCAACTtctacaaggactattga	0						5'	New	gp4	...((((((((.(((((((((((((((((..(((((((((((((((((((((.((......))............((.............))...)))))))))))))))))))))..))))))))))))))))).))))))))...	141	38.1	-77.4	1.4	0	0	0	0	0	6	0	0	0	0	0	5.67859	low
5	6	PC-3p-74503_21	TAAGGGGCGTTGCAAGCAACT	21	contig_3266448	-	488	634	cccatagtcctagtagaagTTGCTTGCAACACCCCTTATGcaatatgttcaaagcacaaaggcaaattaaaaaagggttatcaaaaggcttcaaattgaacatattgcaTAAGGGGCATTGCAAGCAACTtctacaaggactattga	0						3'	New	gp4	...((((((((.(((((((((((((((((..(((((((((((((((((((((.((......))............((.............))...)))))))))))))))))))))..))))))))))))))))).))))))))...	141	38.1	-77.4	1.4	0	3.5	2.5	4.5	0	0	0	3.02195	2.93135	4.35858	0	0	low
6	6	PC-3p-74503_21	TAAGGGGCGTTGCAAGCAACT	21	contig_3266448	+	580	726	tcaatagtccttgtagaagttgcttgcaatgccccttatgcaatatgttcaatttgaagccttttgataacccttttttaatttgcctttgtgctttgaacatattgcaTAAGGGGTGTTGCAAGCAACTtctactaggactatggg	0						3'	New	gp4	...((((((((.(((((((((((((((((..(((((((((((((((((((((...(((((...((((..........))))...).)))).....)))))))))))))))))))))..))))))))))))))))).))))))))...	141	38.1	-82.2	1.5	0	3.5	2.5	4.5	0	0	0	3.02195	2.93135	4.35858	0	0	low
7	7	PC-5p-29475_91	TGCACCTCAGTCAACATCGGT	21	contig_1631498	-	1783	1873	ataaataTGCACCTCAGTCAACATGGGTcaatgcatcatgaaatggacggtcatgatgcattgacccatgttgactgaggtgcgtattgga	0						5'	New	gp4	...((((((((((((((((((((((((((((((((((((((.........))))))))))))))))))))))))))))))))))))))...	85	44	-69.5	1.7	0	0	0	19	15	14	0	0	0	18.4029	19.0325	13.25	middle
8	7	PC-5p-29475_91	TGCACCTCAGTCAACATCGGT	21	contig_546687	-	1822	1965	accagcggctaagcttcactcaataTGCACCTCAGTCAACATCGGTcaatgcatcatgaccatccatttcgaaatggatggtcatgatgcattgatcggcgttgactaaggtgcaaattgagtgaagggtatccctcagctacc	0						5'	New	gp4	...(((((.((..(((((((((((.(((((((.(((((((..((((((((((((((((((((((((((....))))))))))))))))))))))))))..))))))).))))))).)))))))))))..)).))....)))...	138	47.2	-91.6	1.3	0	0	0	19	15	14	0	0	0	18.4029	19.0325	13.25	middle
9	8	PC-3p-32077_81	AGACTTGCCTGGCCGTATCCT	21	contig_1147747	-	115	224	tacggcctggatacatgcccggaaacggccaggcaggtccgggtacgtctgcagacatacccggctgtatccAGACCTGCCTGGCCGTATCCTggcgtttccaggtccaa	0						3'	New	gp4	...((((((((...(((((.(((.(((((((((((((((((((((.(((....))).)))))))..........)))))))))))))).))).))))).))))))))...	104	61.8	-72.5	1.1	9	19.5	15	21.5	12	19.5	8.90824	16.8366	17.5881	20.8243	15.226	18.4554	middle
10	8	PC-3p-32077_81	AGACTTGCCTGGCCGTATCCT	21	contig_149995	-	56	153	ctggaagtggccaggatacagctaggtaggtccgggtatgattaggtatgtctgaagacgtacccAGACTTGCCTGGCTGTATCCTggtgttttcatg	0						3'	New	gp4	...((((..(((((((((((((((((((((((.(((((((.(((((....)))))...))))))).)))))))))))))))))))))))..))))...	92	51	-60.6	1.2	9	19.5	15	21.5	12	19.5	8.90824	16.8366	17.5881	20.8243	15.226	18.4554	middle
11	9	PC-3p-35643_69	TGGACGTACCCTGGCTGTACC	21	contig_1207961	-	411	518	tatgctacgggtacgcctaggttacctctgacagtgcccaggtatggccaggcacctcctagatgtacccgagtattgtTGGAGGTACCCTGGCTGTACCcaagcata	0						3'	New	gp4	((((((..(((((((((.(((.((((((..(((((((...(((((....(((.....)))....)))))...)))))))..)))))).)))))).)))))).))))))	108	54.6	-54.1	0.9	5.5	6	4	8.5	0	10.5	5.44392	5.18049	4.69016	8.23287	0	9.93754	low
12	9	PC-3p-35643_69	TGGACGTACCCTGGCTGTACC	21	contig_731581	+	1310	1433	cgatacggatatggtacgcacaaggtacgtccagcagtaccccggtacgtctgggtacttctcaggaagtacccagacgtacttggttactgcTGGACATACCCTGGCTGTACCcacagtaaaa	0						3'	New	gp4	...(((......(((((((.((.((((.(((((((((((.((..(((((((((((((((((....)))))))))))))))))..)).))))))))))).)))).)))).)))))....)))...	118	52.4	-75.2	1.2	5.5	6	4	8.5	0	10.5	5.44392	5.18049	4.69016	8.23287	0	9.93754	low
13	10	PC-3p-22026_137	CGGGACCTGTGGGTACATACC	21	contig_2425835	-	1245	1342	tagctgtgggtacgtacccacaggccctaagtacatcccaggtacggttttctgtacccagagcatatcCAGGACCTGTGGGTACATACCcacagggt	0						3'	New	gp4	...(((((((((.(((((((((((.(((..(((..((...(((((((....)))))))..))...)))..))).))))))))))).)))))))))...	92	54.1	-54.3	1	4	0	0	29.5	15	20	3.95922	0	0	28.5729	19.0325	18.9286	middle
14	10	PC-3p-22026_137	CGGGACCTGTGGGTACATACC	21	contig_2841604	+	1390	1534	acgttgtggatacgttgttgccagttggtacatacccacatgtcccaagtatggtctaggtatggatttctgtacccaagacttgtgccatatccggactgtaccCGGGACCTGTGGGTACGTACCcgcaacatacccacaagta	0						3'	New	gp4	((.((((((......((((((.....(((((.((((((((.(((((..(((..(((..(((((((...(((.......)))......)))))))..)))..)))..))))).)))))))).))))).))))))...)))))))).	144	50.3	-67	0.9	4	0	0	29.5	15	20	3.95922	0	0	28.5729	19.0325	18.9286	middle
15	11	PC-5p-164_11331	TAAAGGTCAAGTGCATGGATG	21	contig_3634261	-	1760	1890	aaggctcttggccTAAAGGTCAAGTGCATGGATAaactttagccggcctgctgactgagtactcctagagtcgataaacacccataacactaaaggtcaTTCATGCACTGGACTTTTAGGtttagagtgta	0						5'	New	gp4	...(((((..(((((((((((.(((((((((((...((((((..((..((((.....))))..))....((......))..........))))))...))))))))))).)))))))))))..)))))...	125	44.3	-49.4	0.9	4454	8861	7513	507	377	537	4408.59	7650.72	8809.28	491.067	478.351	508.234	high
15	12	PC-3p-53491_37	TTCATGCACTGGACTTTTAGG	21	contig_3634261	-	1760	1890	aaggctcttggccTAAAGGTCAAGTGCATGGATAaactttagccggcctgctgactgagtactcctagagtcgataaacacccataacactaaaggtcaTTCATGCACTGGACTTTTAGGtttagagtgta	0						3'	New	gp4	...(((((..(((((((((((.(((((((((((...((((((..((..((((.....))))..))....((......))..........))))))...))))))))))).)))))))))))..)))))...	125	44.3	-49.4	0.9	15	20	22	0	0	0	14.8471	17.2683	25.7959	0	0	0	middle
16	13	PC-5p-59442_31	TATGTACCCACAGGCCCTGGG	21	contig_157088	+	1	94	gtacactgtgagTATGTACCCACAGGCCCTGGGtacgtcccaggtacggatttctgtacccattgcctgtgggtacatacccacagcatacccg	0						5'	New	gp4	(((..(((((.((((((((((((((((..(((((((((((.......))))....)))))))..)))))))))))))))).)))))..)))...	91	55.3	-55.7	1.1	0	0	9.5	4	5.5	3.5	0	0	11.1391	3.87429	6.9786	3.31251	middle
17	13	PC-5p-59442_31	TATGTACCCACAGGCCCTGGG	21	contig_3197989	+	16	123	gtgggtacattgtgggTATGTACCCACAGGCCCTGGGtgcgtctccacagcctacccaaagcctaccagtacccagtgcctgtgggtttgtacccacaacgtaccagt	0						5'	New	gp4	...(((((.((((((((((..((((((((((.((((((((............................)))))))).))))))))))..)))))))))).)))))...	102	57.4	-60.8	1	0	0	9.5	4	5.5	3.5	0	0	11.1391	3.87429	6.9786	3.31251	middle
18	14	PC-3p-39083_60	TTGACTGAGGTGCATATTGAG	21	contig_208755	+	1	105	tcaatatgcaccttagtcaacatcgttcaatgcatcattagcatccatttcaaaatggatggtcatgatgcattgaccgacaTTGACTGAGGTGCATATTGAGtg	0						3'	New	gp4	((((((((((((((((((((..(((.((((((((((((...((((((((....))))))))...)))))))))))).)))..))))))))))))))))))))...	102	40	-63.6	1.5	0	0	0	7	8.5	14.5	0	0	0	6.78001	10.7851	13.7233	middle
19	14	PC-3p-39083_60	TTGACTGAGGTGCATATTGAG	21	contig_546687	+	1765	1880	ccttcactcaatttgcaccttagtcaacgccgatcaatgcatcatgaccatccatttcgaaatggatggtcatgatgcattgaccgatgTTGACTGAGGTGCATATTGAGtgaagc	0						3'	New	gp4	.(((((((((((.(((((((((((((((..((.(((((((((((((((((((((((....))))))))))))))))))))))).))..))))))))))))))).))))))))))).	114	44.8	-86.8	1.7	0	0	0	7	8.5	14.5	0	0	0	6.78001	10.7851	13.7233	middle
20	15	PC-5p-13621_255	CCAGCCTGGAACGAAGCACGC	21	contig_2934792	-	1682	1794	tcatggcgcatggaaatccACAGCCTGGAACGAAGCACGCtctctctttcttttacgatatcaagatagatagcgTGTTTCGTTTCAGGCTTATGCattttcatacgtcaaca	0						5'	New	gp4	...(((((.((((((((.((.((((((((((((((((((((...(((.((((..........)))).))).))))))))))))))))))))..)).)))))))).)))))...	107	43.4	-51.4	1	42	72	0	302	429	453	41.5718	62.1658	0	292.509	544.331	428.734	middle
20	16	PC-3p-14952_228	TGTTTCGTTTCAGGCTTATGT	21	contig_2934792	-	1682	1794	tcatggcgcatggaaatccACAGCCTGGAACGAAGCACGCtctctctttcttttacgatatcaagatagatagcgTGTTTCGTTTCAGGCTTATGCattttcatacgtcaaca	0						3'	New	gp4	...(((((.((((((((.((.((((((((((((((((((((...(((.((((..........)))).))).))))))))))))))))))))..)).)))))))).)))))...	107	43.4	-51.4	1	0	11	0	63	138	109	0	9.49756	0	61.0201	175.099	103.161	middle
21	17	PC-3p-25369_113	CAGGGCCTGTGGGTATGTACC	21	contig_256689	+	18	115	acgctgtgggtacgtacccataggccctaggtacatcccgggtacagttttctgtacctggaacataccCAGGGCCTGTGGGTATGTACCcacagagt	0						3'	New	gp4	((.(((((((((((((((((((((((((.((((....((((((((((....))))))))))....)))).))))))))))))))))))))))))).))	98	55.1	-76.1	1.4	16	14	5.5	10	6	9	15.8369	12.0878	6.44896	9.68573	7.61301	8.51789	middle
22	17	PC-3p-25369_113	CAGGGCCTGTGGGTATGTACC	21	contig_2748876	+	38	141	aaaactatgtgggtacgtacccacatgccctctgtacatcccgggtacggttttctgtacccggtacataccCAGGGCCTGTGGGTATGTACCcacagagtacc	0						3'	New	gp4	...(((.((((((((((((((((((.(((((..(((....((((((((((....))))))))))....)))..))))).)))))))))))))))))).)))...	98	53.8	-67.9	1.2	16	14	5.5	10	6	9	15.8369	12.0878	6.44896	9.68573	7.61301	8.51789	middle
23	18	PC-3p-65512_26	ACCTTTGACCATGAGACCTCT	21	contig_2240660	+	720	802	caagcaagaggtctcatggtcaaaggtacttagaatgtaattgttgcattctaaggACCTTTGACCATGAGAACTCTtgtgac	0						3'	New	gp4	...(((((((.((((((((((((((((.((((((((((((...)))))))))))).)))))))))))))))).)))))))...	77	41	-52.8	1.6	2.5	3	0	3.5	0	4	2.47451	2.59024	0	3.39001	0	3.78573	low
24	18	PC-3p-65512_26	ACCTTTGACCATGAGACCTCT	21	contig_2240660	-	645	771	gttgcaagagctctcatggtcgtaggtcacaagagttctcatggtcaaaggtccttagaatgcaacaattacattctaagtACCTTTGACCATGAGACCTCTtgcttggaatatggaatcttgcctg	0						3'	New	gp4	...((((((..((.(((..((.((((...((((((.((((((((((((((((.(((((((((.........))))))))).)))))))))))))))).))))))))))))..))))).))))))...	121	43.3	-60.7	1.1	2.5	3	0	3.5	0	4	2.47451	2.59024	0	3.39001	0	3.78573	low
25	19	PC-5p-27911_99	CCATGTTCCTTCAGCCAAATC	21	contig_1209097	-	788	964	agtgccgacttgtcaaccctttcatggaaaatgtcactgCCATGTTCCTTCAGCCAAATCtgtaatgacctccctgtttcaccaatgtattgtttactgcacgaacaaggaactgtgtatacaccatggggaggttgttatataTTTGGCTCAAGGAAAATGGCAatgacattttac	0						5'	New	gp4	...........................(((((((((.((((((.((((((.((((((((.(((((..(((((((((((((.........((((((.......))))))))))).(((....)))...))))))))..))))).)))))))).)))))).)))))).)))))))))..	148	41.8	-67.7	0.9	16	8	0	65	29	33	15.8369	6.90732	0	62.9573	36.7962	31.2323	middle
25	20	PC-3p-43492_51	TTTGGCTCAAGGAAAATGGCA	21	contig_1209097	-	788	964	agtgccgacttgtcaaccctttcatggaaaatgtcactgCCATGTTCCTTCAGCCAAATCtgtaatgacctccctgtttcaccaatgtattgtttactgcacgaacaaggaactgtgtatacaccatggggaggttgttatataTTTGGCTCAAGGAAAATGGCAatgacattttac	0						3'	New	gp4	...........................(((((((((.((((((.((((((.((((((((.(((((..(((((((((((((.........((((((.......))))))))))).(((....)))...))))))))..))))).)))))))).)))))).)))))).)))))))))..	148	41.8	-67.7	0.9	5	7	0	8	13	23	4.94902	6.0439	0	7.74859	16.4949	21.7679	middle
26	21	PC-3p-49149_42	TGCCATTGTGGGTACGTACCC	21	contig_109288	-	442	542	tagggtttgggtacatacccacagtggtagggtacgctacgagtatggaaaaaccgtacccgtagcgtacctTGCCATTGTGGGTACGTACCCagaccata	0						3'	New	gp4	...(((((((((((.((((((((((((((((((((((((((.((((((.....)))))).)))))))))))))))))))))))))).)))))))))))...	95	51.5	-80.1	1.5	0	0	0	6	8.5	6.5	0	0	0	5.81144	10.7851	6.15181	middle
27	21	PC-3p-49149_42	TGCCATTGTGGGTACGTACCC	21	contig_2564397	-	767	884	tatgggtacattgtgggtacgtacccattggggcagggtacgttacgggtacggaaaaccgtacccataacgtatccTGCCTTTGTGGGTACGTACCCagtacgtagtcgtacccaca	0						3'	New	gp4	..((((((((((((((((((((((((((..(((((((((((((((.((((((((....)))))))).)))))))))))))))..))))))))))))))).....)))).)))))))..	114	52.5	-84.4	1.4	0	0	0	6	8.5	6.5	0	0	0	5.81144	10.7851	6.15181	middle
28	22	PC-5p-4311_865	TTTGAGTGAATCCAGAGTCTCT	22	contig_505739	-	461	558	ggtggtTTTGAGTGAATCCAGAGTCTCTtaatagccaaagctcacatctgcagccatttgggcggctatacagAGCTCTGTATTCCCTCAAAACctgt	0						5'	New	gp4	...(((((((((.((((.(((((.((((..((((((...((........)).(((.....)))))))))..))))))))).)))).)))))))))...	92	46.9	-42.6	0.9	62	127	59	277	242	283	61.3678	109.654	69.1798	268.295	307.058	267.84	middle
28	23	PC-3p-171731_5	AGCTCTGTATTCCCTCAAAAC	21	contig_505739	-	461	558	ggtggtTTTGAGTGAATCCAGAGTCTCTtaatagccaaagctcacatctgcagccatttgggcggctatacagAGCTCTGTATTCCCTCAAAACctgt	0						3'	New	gp4	...(((((((((.((((.(((((.((((..((((((...((........)).(((.....)))))))))..))))))))).)))).)))))))))...	92	46.9	-42.6	0.9	0	0	0	0	0	5	0	0	0	0	0	4.73216	low
29	24	PC-5p-113059_10	TATGTACCCGTAGGCCCTGGG	21	contig_2958918	+	43	155	gcgtggatacgctatgtgTATGTACCCATAGGCCCTGGGtacattccgggtatggttttccgtacttagaacatacctagggcatgtgagtatgtacccagagagtaccaata	0						5'	New	gp4	...(((.(((.((.((.(((..(((.((((.((((((((((..(((..(((((((....)))))))..)))..)))))))))).)))).)))..))).)).)).))))))...	107	47.8	-53.4	1	2.5	0	0	0	2.5	0	2.47451	0	0	0	3.17209	0	low
30	24	PC-5p-113059_10	TATGTACCCGTAGGCCCTGGG	21	contig_643089	-	102	203	actgtgggtactctgtgggTATGTACCCATAGGCCCTGGGtacggaaatatggaaatccgtaccctgggcctgtgggtacatacccacagcgtacccacatt	0						5'	New	gp4	..(((((((((.((((((((((((((((((((((((.(((((((((..........))))))))).)))))))))))))))))))))))).)))))))))..	98	53.9	-86.8	1.6	2.5	0	0	0	2.5	0	2.47451	0	0	0	3.17209	0	low
31	25	PC-5p-81952_18	TTATTATAGAATCAAGTGTCT	21	contig_2058984	+	1076	1244	tgctaaaatcttgccaaggacttgttgaagcttTTATTATAGAACCAAGTGTCTtgttattattgttgaggacattcagtatcatgcaaaaggaaaatctacagcaccaatattgaaACACTTGGTTCTATGATGAATgcttcaacaagtctgtagcaagattttacta	0						5'	New	gp4	...(((((((((((...((((((((((((((.((((((((((((((((((((.((..((((..(((((..((..(((...............)))..))..)))))..))))..)).)))))))))))))))))))).))))))))))))))...)))))))))))...	163	33.7	-74.4	1.3	0	0	0	0	13	5	0	0	0	0	16.4949	4.73216	middle
31	26	PC-3p-102803_12	ACACTTGGTTCTATGATGAAT	21	contig_2058984	+	1076	1244	tgctaaaatcttgccaaggacttgttgaagcttTTATTATAGAACCAAGTGTCTtgttattattgttgaggacattcagtatcatgcaaaaggaaaatctacagcaccaatattgaaACACTTGGTTCTATGATGAATgcttcaacaagtctgtagcaagattttacta	0						3'	New	gp4	...(((((((((((...((((((((((((((.((((((((((((((((((((.((..((((..(((((..((..(((...............)))..))..)))))..))))..)).)))))))))))))))))))).))))))))))))))...)))))))))))...	163	33.7	-74.4	1.3	0	0	0	0	0	12	0	0	0	0	0	11.3572	middle
32	27	PC-5p-19359_164	ACTTCGCCAACAATCTCAGC	20	contig_1487955	-	1344	1436	gctgACTTCGCCAACAATCTCAGCaactgtgtttcaagtatatatacagtgtatatatcaggggatggagcTGAGATTGTTGGAGAGGTTCaa	0						5'	New	gp4	...((((((.((((((((((((((..(..(.(..(..((((((((.....))))))))..)..))..).)))))))))))))).))))))...	87	41.9	-39.6	1	0	0	0	22	70	78	0	0	0	21.3086	88.8185	73.8217	middle
32	28	PC-3p-340_6557	TGAGATTGTTGGAGAGGTTC	20	contig_1487955	-	1344	1436	gctgACTTCGCCAACAATCTCAGCaactgtgtttcaagtatatatacagtgtatatatcaggggatggagcTGAGATTGTTGGAGAGGTTCaa	0						3'	New	gp4	...((((((.((((((((((((((..(..(.(..(..((((((((.....))))))))..)..))..).)))))))))))))).))))))...	87	41.9	-39.6	1	0	0	0	1767	3169	3634	0	0	0	1711.47	4020.94	3439.33	high
33	29	PC-5p-7467_498	AATTCGTGGATTCCAGGGACA	21	contig_352404	-	159	279	ctatcgatcaattattttttggaAATTCGTGGATTCCAGGGACAggaattgtctttaaccttgagtgagagcaactctTGTAGCTGGAATCCATGAATTcctggaaatatattggcggact	0						5'	New	gp4	...(((.(((((((((((..((.((((((((((((((((..((((((.(((.((((.((.....)).))))))).))))))..))))))))))))))))))..)))))).))))))))...	115	39.7	-50.1	1	170	174	25	361	50	0	168.267	150.234	29.3135	349.655	63.4418	0	middle
33	30	PC-3p-3402_1072	TGTAGCTGGAATCCATGAATT	21	contig_352404	-	159	279	ctatcgatcaattattttttggaAATTCGTGGATTCCAGGGACAggaattgtctttaaccttgagtgagagcaactctTGTAGCTGGAATCCATGAATTcctggaaatatattggcggact	0						3'	New	gp4	...(((.(((((((((((..((.((((((((((((((((..((((((.(((.((((.((.....)).))))))).))))))..))))))))))))))))))..)))))).))))))))...	115	39.7	-50.1	1	169	339	74	647	83	0	167.277	292.698	86.7679	626.667	105.313	0	middle
34	31	PC-5p-132212_7	AAATAGCCTCCTCCTCTACACC	22	contig_4350140	+	1884	1964	gcagAAATAGCCTCCTCCTCTACATCaggctatatccagcactacggaaatcatgcctggtgtagaggaggaggctatttc	0						5'	New	gp4	...(((((((((((((((((((((((((((....(((........)))......)))))))))))))))))))))))))))	78	49.4	-55.3	1.4	0	0	0	6	0	0	0	0	0	5.81144	0	0	low
35	31	PC-5p-132212_7	AAATAGCCTCCTCCTCTACACC	22	contig_4350140	-	1822	1900	gAAATAGCCTCCTCCTCTACACCaggcatgatttccgtagtgctggatatagcctgatgtagaggaggaggctatttct	0						5'	New	gp4	(((((((((((((((((((((.(((((......((((......))))....))))).))))))))))))))))))))).	78	48.1	-52.7	1.4	0	0	0	6	0	0	0	0	0	5.81144	0	0	low
36	32	PC-5p-29597_91	TTGTCTTTGATCTGTGCACTC	21	contig_2757276	+	1	132	ttttttggTTGTCTTTGATCTGTGCACTCttggacacatcaactgtgcttagtggacatatttaatgttgaaggagagtttacgaaaaatatgtctccaagagagcacagatcaaagacaaccaaaaaacta	0						5'	New	gp4	(((((((((((((((((((((((((.(((((((.((((.....))))......((((((((((..(((.(((......))))))..))))))))))))))))).)))))))))))))))))))))))))...	129	36.4	-62.8	1.3	3	5.5	3.5	13.5	10.5	13.5	2.96941	4.74878	4.10389	13.0757	13.3228	12.7768	middle
37	32	PC-5p-29597_91	TTGTCTTTGATCTGTGCACTC	21	contig_2757276	-	110	241	tagttttttggTTGTCTTTGATCTGTGCTCTCttggagacatatttttcgtaaactctccttcaacattaaatatgtccactaagcacagttgatgtgtccaagagtgcacagatcaaagacaaccaaaaaa	0						5'	New	gp4	...(((((((((((((((((((((((((.(((((((.(((((((((...((.............))...)))))))))......(((((.....)))))))))))).)))))))))))))))))))))))))	129	36.4	-63.8	1.3	3	5.5	3.5	13.5	10.5	13.5	2.96941	4.74878	4.10389	13.0757	13.3228	12.7768	middle
38	33	PC-3p-35603_69	CAGGGCTTGTGGGTACGTACC	21	contig_72969	+	27	135	gtgggtatgctgtgagtaagtacccatgggccctgggtacatcccgggtacgattttccatacccggatgtaccCAGGGCTTGTGGGTACGTACCcatagagtactagt	0						3'	New	gp4	...((((..(((((.(((.(((((((..((((((((((((((((.(((((..........)))))))))))))))))))))..))))))).))).)))))..))))...	103	54.1	-71.5	1.2	5.5	8.5	0	9.5	6.5	7	5.44392	7.33902	0	9.20145	8.24743	6.62502	low
39	33	PC-3p-35603_69	CAGGGCTTGTGGGTACGTACC	21	contig_986407	-	44	157	ctttgggtgtgctgtgggtatgtactcacagaacttgggtacgtcccgggtacggaaatccacacccgagaagtaccCAGGGCTTGTGGGTACGTACCcacagagtacccacac	0						3'	New	gp4	...((((((..((((((((((((((((((((..(((((((((.((.(((((..((....))..))))).)).)))))))))..))))))))))))))))))))..))))))...	108	56.1	-76.4	1.2	5.5	8.5	0	9.5	6.5	7	5.44392	7.33902	0	9.20145	8.24743	6.62502	low
40	34	PC-3p-37075_65	TCCTTGGTCCACCTAACTAAC	21	contig_1316899	+	1218	1296	tactgctctgttagttaggtggaccaaggattggtagccaaacacccagTCCTTGGTCCACCTAACTTACagagcaact	0						3'	New	gp4	...((((((((.((((((((((((((((((((((...........)))))))))))))))))))))).))))))))...	73	48.1	-55.1	1.4	8.5	8.5	2.5	10	3	0	8.41333	7.33902	2.93135	9.68573	3.80651	0	low
41	34	PC-3p-37075_65	TCCTTGGTCCACCTAACTAAC	21	contig_1316899	-	1169	1272	tatatgcagagttgctctgtaagttaggtggaccaaggactgggtgtttggctaccaaTCCTTGGTCCACCTAACTAACagagcagtatcgagctcagtatggc	0						3'	New	gp4	..(((((.((((((((((((.((((((((((((((((((.(((..(.....)..))).)))))))))))))))))).)))))))).......)))).)))))..	100	48.1	-58.9	1.2	8.5	8.5	2.5	10	3	0	8.41333	7.33902	2.93135	9.68573	3.80651	0	low
42	35	PC-3p-70353_23	TTTTTCCAATACCACCTATATC	22	contig_1483681	-	65	151	aacactattgatgtaggtgtattggacaaaacatggagaccatgtttccattgcgtTTTTTCCAATACCACTTATATCtatagtttc	0						3'	New	gp4	...(((((.(((((((((((((((((.(((((((((((((...))))))))...))))).))))))).)))))))))).)))))...	81	34.5	-36.2	1.2	0	0	11.5	0	0	0	0	0	13.4842	0	0	0	middle
43	35	PC-3p-70353_23	TTTTTCCAATACCACCTATATC	22	contig_2730	-	618	714	agtgggaagtatactacgggtatagatgtattggacaaaactctgaagaaaatatggagTTTTTCCAATACCATCTATATCtgtagtcttcaccact	0						3'	New	gp4	(((((((((...(((((((((((((((((((((((.((((((((...........))))))))))))))).)))))))))))))))))))).)))))	97	36.1	-48.2	1.4	0	0	11.5	0	0	0	0	0	13.4842	0	0	0	middle
44	36	PC-5p-105444_11	TTGAGGTGTCAATGGTCCAAA	21	contig_482982	-	1190	1359	cctttaatagctatagttaatactaatagtctccTTGAGGTGTCAATGGTCCAAAccatcaattcaaacctaccgtagtattaaccatcaattcaaacctacctgttctaattgttggctTGGACCGTTGACACCTCGAGGagatttttaactgaagctattaaaggaag	0						5'	New	gp4	((((((((((((..((((((.......(((((((((((((((((((((((((((.(((.(((((..(((.....((((....................))))..)))..))))).))).))))))))))))))))))))))))))).))))))..))))))))))))...	167	37.6	-77.8	1.2	0	6	0	0	5	0	0	5.18049	0	0	6.34418	0	low
44	37	PC-3p-34453_72	TGGACCGTTGACACCTTGAGG	21	contig_482982	-	1190	1359	cctttaatagctatagttaatactaatagtctccTTGAGGTGTCAATGGTCCAAAccatcaattcaaacctaccgtagtattaaccatcaattcaaacctacctgttctaattgttggctTGGACCGTTGACACCTCGAGGagatttttaactgaagctattaaaggaag	0						3'	New	gp4	((((((((((((..((((((.......(((((((((((((((((((((((((((.(((.(((((..(((.....((((....................))))..)))..))))).))).))))))))))))))))))))))))))).))))))..))))))))))))...	167	37.6	-77.8	1.2	12	12	15	13	13	13	11.8776	10.361	17.5881	12.5915	16.4949	12.3036	middle
45	38	PC-5p-69775_24	AGCTCCTTTCAGTCCAAAGGA	21	contig_3624382	+	52	134	attcccagatgggAGCTCCTTTCAGTCCAAAGGActagagaagatctcgtcctttggactgaagggagctcccatctgggttt	0						5'	New	gp4	...((((((((((((((((((((((((((((((((.(((.....))).))))))))))))))))))))))))))))))))...	77	50.6	-70.3	1.7	0	0	0	6.5	0	5.5	0	0	0	6.29573	0	5.20538	low
46	38	PC-5p-69775_24	AGCTCCTTTCAGTCCAAAGGA	21	contig_3624382	-	108	190	aaacccagatgggAGCTCCCTTCAGTCCAAAGGAcgagatcttctctagtcctttggactgaaaggagctcccatctgggaat	0						5'	New	gp4	...((((((((((((((((.((((((((((((((((((.....)))..))))))))))))))).))))))))))))))))...	77	50.6	-66.2	1.6	0	0	0	6.5	0	5.5	0	0	0	6.29573	0	5.20538	low
47	39	PC-5p-5477_682	AGTGGGCGGTCTGGTGAAACT	21	contig_5205258	-	194	301	aatcttaggggaatagctgtAGTGGGCGGTCTGGTGAAACTcccgttttcttttaaggaaaataaagTTTTACCAGAACCGCCCATTCCtgctatttcggttaagcat	0						5'	New	gp4	...(((((.((((((((...(((((((((((((((((((((...(((((((.....)))))))..)))))))))))).)))))))))...))))))))..)))))...	102	42.6	-50.6	1.1	113	219	131	82	65	83	111.848	189.088	153.603	79.423	82.4743	78.5539	middle
47	40	PC-3p-9_473750	TTTTACCAGAACCGCCCATTCC	22	contig_5205258	-	194	301	aatcttaggggaatagctgtAGTGGGCGGTCTGGTGAAACTcccgttttcttttaaggaaaataaagTTTTACCAGAACCGCCCATTCCtgctatttcggttaagcat	0						3'	New	gp4	...(((((.((((((((...(((((((((((((((((((((...(((((((.....)))))))..)))))))))))).)))))))))...))))))))..)))))...	102	42.6	-50.6	1.1	153021	126134	29237	83879	45630	85336	151461	108906	34281.5	81243	57897	80764.7	high
48	41	PC-5p-45766_47	TTCAAGCCAATCTACATTGAT	21	contig_876882	+	1369	1484	cgagattcaaccatttggtTTCAAGCCAATCTACATTGATcaatatttcacgagtagcggttcacaaaaaatataggTCAATGTAGATTGGCTTGAAAttatgcagctgaatcatg	0						5'	New	gp4	...((((((......(..(((((((((((((((((((((((.((((((...(((......))).....)))))).)))))))))))))))))))))))..)......))))))...	110	36.2	-46.2	1.1	0	0	7	16	13	11	0	0	8.20777	15.4972	16.4949	10.4108	middle
48	42	PC-3p-101200_12	TCAATGTAGATTGGCTTGAAA	21	contig_876882	+	1369	1484	cgagattcaaccatttggtTTCAAGCCAATCTACATTGATcaatatttcacgagtagcggttcacaaaaaatataggTCAATGTAGATTGGCTTGAAAttatgcagctgaatcatg	0						3'	New	gp4	...((((((......(..(((((((((((((((((((((((.((((((...(((......))).....)))))).)))))))))))))))))))))))..)......))))))...	110	36.2	-46.2	1.1	0	0	7	0	0	5	0	0	8.20777	0	0	4.73216	low
49	43	PC-5p-63819_28	AAGACGCCGAGAGTTATCATT	21	contig_103364	+	857	1041	catggatgctactagcatacctatcttaagataaatatatgtaaAAGACGCCGAGAGTTATCATTctcgaggcacttattccatttatgtcacaaatccaatataggtgcctcaagaatgatacctcatggcatcttttacatagatttatctaagataggtttgcttgtacttttgagtcccat	0						5'	New	gp4	...((((..(((.((((.(((((((((.((((((((.(((((((((((.(((..(((.(((((((((.(((((((((((.......................))))))))))).))))))))).)))..))).))))))))))).))))))))))))))))).)))).))).......))))...	179	35.7	-81.6	1.2	0	3	0	5.5	3	2.5	0	2.59024	0	5.32715	3.80651	2.36608	low
50	43	PC-5p-63819_28	AAGACGCCGAGAGTTATCATT	21	contig_358132	-	92	240	gcatacctatcttacataaatctatgaaaAAGACGCCGAGAGGTATCATTctagaggtgtctatactggatttgagacataagtggaataaacacctcaagaatgatacctctcagtgtcttttacatagatttatttaaaataggtat	0						5'	New	gp4	..((((((((.(((.(((((((((((.(((((((((.(((((((((((((((.(((((((.(((.((..(((((.....))))))).))).))))))).))))))))))))))).))))))))).))))))))))).))).))))))))	147	33.6	-74.2	1.5	0	3	0	5.5	3	2.5	0	2.59024	0	5.32715	3.80651	2.36608	low
51	44	PC-5p-31757_82	TGGGAGCGCCCAGGGTACGTC	21	contig_1450680	-	2334	2474	tagccacggatacggctTGGGAGCGGCCAGGGTACGTCgtgtaccctgtggatatgcccgggtacagatacaattgtacccgggcgtatccacaaggtacacgacgtaccctaggcactcccacgtcgtacccatcgccgt	0						5'	New	gp4	..((...((.((((((.((((((..((((((((((((((((((((.(((((((((((((((((((((......))))))))))))))))))))).))))))))))))))))).))).)))))).)))))).))...))...	136	59.6	-105.1	1.2	0	7	10.5	7	8.5	8	0	6.0439	12.3117	6.78001	10.7851	7.57146	middle
52	44	PC-5p-31757_82	TGGGAGCGCCCAGGGTACGTC	21	contig_3105413	+	974	1083	atcgcgTGGGAGCGCCCAGGGTACGTCgtgtaccctatggataagcttgggatacaatgtggcagcgtatccacagggtacacgacataccctggccgctcccaagccat	0						5'	New	gp4	...((.((((((((.((((((((.((((((((((((.((((((.(((.(..((.....))..)))).)))))).)))))))))))).)))))))).)))))))).))...	104	58.2	-70.6	1.1	0	7	10.5	7	8.5	8	0	6.0439	12.3117	6.78001	10.7851	7.57146	middle
53	45	PC-5p-29248_92	TGGAAACTACCATTAGCTATC	21	contig_252738	+	1048	1175	gacataaaatgcaaggaatgTGGAAACTACCATTAGCTATCaaataaattcagtgctcactggagattctgttattattattttgaTAGCCAATGGTAGTTTTCCACAttccatgtcaattttataga	0						5'	New	gp4	...((((((((((.((((((((((((((((((((.((((((((((((...(((..(((....)))...)))...))))....)))))))).)))))))).)))))))))))).)))..)))))))...	122	32	-52.1	1.3	18	9.5	18.5	14	20.5	29	17.8165	8.20244	21.692	13.56	26.0111	27.4465	middle
53	46	PC-3p-345_6504	TAGCCAATGGTAGTTTTCCACA	22	contig_252738	+	1048	1175	gacataaaatgcaaggaatgTGGAAACTACCATTAGCTATCaaataaattcagtgctcactggagattctgttattattattttgaTAGCCAATGGTAGTTTTCCACAttccatgtcaattttataga	0						3'	New	gp4	...((((((((((.((((((((((((((((((((.((((((((((((...(((..(((....)))...)))...))))....)))))))).)))))))).)))))))))))).)))..)))))))...	122	32	-52.1	1.3	1370	1538	417	4193	1921	5031	1356.03	1327.93	488.949	4061.23	2437.43	4761.5	high
54	47	PC-3p-55411_35	TACATCTTTCCTTATCACTCA	21	contig_2431404	+	1282	1366	agaatgttgagtgataaggaaagatgtatgtctacagattctctttgttataagtagaccTACATCTTTCCTTATCACTCAacat	0						3'	New	gp4	...(((((((((((((((((((((((((.((((((..................)))))).)))))))))))))))))))))))))	82	32.9	-47	1.7	6	8	0	0	3.5	0	5.93882	6.90732	0	0	4.44093	0	low
55	47	PC-3p-55411_35	TACATCTTTCCTTATCACTCA	21	contig_2431404	-	1169	1253	atgttgagtgataaggaaagatgtaggtctacttataacaaagagaatctgtagacaTACATCTTTCCTTATCACTCAacattct	0						3'	New	gp4	(((((((((((((((((((((((((.((((((..................)))))).)))))))))))))))))))))))))...	82	32.9	-47.3	1.7	6	8	0	0	3.5	0	5.93882	6.90732	0	0	4.44093	0	low
56	48	PC-5p-152553_6	AAGACACTGAGAGGTATCATT	21	contig_358132	+	1	150	atacctattttaaataaatctatgtaaAAGACACTGAGAGGTATCATTcttgaggtgtttattccacttatgtctcaaatccagtatagacacctctagaaTGATACCTCTCGGCGTCTTTTtcatagatttatgtaagataggtatgct	0						5'	New	gp4	((((((((((((.(((((((((((.(((((((.(((((((((((((((((.(((((((((((.......................))))))))))).))))))))))))))))).))))))).))))))))))).))))))))))))...	147	33.3	-80.3	1.6	0	6	0	0	0	0	0	5.18049	0	0	0	0	low
56	49	PC-3p-79881_19	TGATACCTCTCGGCGTCTTTT	21	contig_358132	+	1	150	atacctattttaaataaatctatgtaaAAGACACTGAGAGGTATCATTcttgaggtgtttattccacttatgtctcaaatccagtatagacacctctagaaTGATACCTCTCGGCGTCTTTTtcatagatttatgtaagataggtatgct	0						3'	New	gp4	((((((((((((.(((((((((((.(((((((.(((((((((((((((((.(((((((((((.......................))))))))))).))))))))))))))))).))))))).))))))))))).))))))))))))...	147	33.3	-80.3	1.6	0	0	0	14	10	17	0	0	0	13.56	12.6884	16.0893	middle
57	50	PC-3p-45853_47	TGATACCTCTTGGCATATCTT	21	contig_558934	-	970	1134	ttaactagcatatatatattaaaaaaatctatataaaatataccaagaggtataattcttgaggtgcctatattaaatttaagaattacatagaataggcgcctcgagaaTGATACCTCTTGACATATCTTacatagattttttaaagatatgtatactagtgat	0						3'	New	gp4	...(((((.((((((((.((.(((((((((((.(((.((((..((((((((((.(((((((((((((((((.......................))))))))))))))))).))))))))))..)))).))).))))))))))).)).)))))))).)))))...	159	25.5	-67	1.6	7	6	0	15	10	9	6.92863	5.18049	0	14.5286	12.6884	8.51789	middle
58	51	PC-5p-46830_46	TACGTAGCCACAGGCCCTGGG	21	contig_1621780	-	1967	2064	aaattgtgggTACGTACCCACAGGCCCTGGGtacttccctggtacggattcccatacgcaggacatacccagggcctatgggtacgtacccacaacgt	0						5'	New	gp4	...(((((((((((((((((.((((((((((((....(((((((.((....)).))).))))...)))))))))))).)))))))))))))))))...	92	56.1	-69.7	1.3	0	5	5	12	15	14	0	4.31707	5.86269	11.6229	19.0325	13.25	middle
59	52	PC-3p-139210_7	TAGGGCTTGTGGGTACGTACC	21	contig_787719	-	53	145	ctctgtgggtaagtacccacaggccctgggtacattccaggtacagaaaatcgtaacagggatgtaccTAGGGCTTGTGGGTACGTACCcaca	0						3'	New	gp4	...((((((((.((((((((((((((((((((((((((...(((........)))...)))))))))))))))))))))))))).))))))))	90	52.7	-67.7	1.4	0	2.5	0	7	0	0	0	2.15854	0	6.78001	0	0	low
60	53	PC-5p-106235_11	TACGTCCAGTAGTAGCCGGGT	21	contig_325333	-	131	208	ccagggTACGTCCAGTAGTACCCGGGTacttcatgagaaatacccagacgtacccgggtactgctgaacgtaccccct	0						5'	New	gp4	...((((((((.(((((((((((((((((.((.((.........)))).))))))))))))))))).))))))))...	72	56.4	-50.4	1.1	0	0	0	6	0	5	0	0	0	5.81144	0	4.73216	low
61	54	PC-5p-51937_39	GTAAAAGATGCTGAGAGAGAT	21	contig_2308536	+	779	946	atataactagcatatatatcttagacaaatctatGTAAAAGATGCTGAGAGATATcatttttatgcgcctaatccacttaagtctcaaatataatatagacacctagagaatgatacctctcagtgtcttttatatagatttatccaaaaaatgtatgctagttacag	0						5'	New	gp4	...((((((((((((((......((.((((((((((((((((..(((((((.((((((((((.......(((.....))).((((............)))).....)))))))))).)))))))..)))))))))))))))).))......))))))))))))))...	162	29.2	-62.1	1.3	7	8	14	5	5	0	6.92863	6.90732	16.4155	4.84287	6.34418	0	middle
62	55	PC-5p-8061_460	ATTGGATCCATCTTTAGGGGA	21	contig_1387698	-	710	902	ttctagattcatctgtatcaaattgattttgtctgacattttggattttactATTGGATCCATCTTTAGGGGAatgaagaatgaagggagaatggagaatgaagatagctccattcttcattctcctgaagatggatctaatattgggatgtgaaatgccggacaaaaatattttgatgcagatgaatctaaa	0						5'	New	gp4	...(((((((((((((((((((....(((((((((.((((((..(((..(.(((((((((((((((((((((((((((((((....((((..................))))))))))))))))))))))))))))))))))).)..)))..)))))).)))))))))....)))))))))))))))))))..	188	34.2	-97.6	1.5	33	57	40	174	84	96	32.6635	49.2146	46.9016	168.532	106.582	90.8575	middle
63	56	PC-3p-388_5924	TCGTAATTAGGATCAGCCTCC	21	contig_1414066	+	190	303	ccagaggtagattctaattatgatgtgtttcaggtgcttacttaggttaaaaataagattgaaagttcttattaactagcgtttgtgctcaTCGTAATTAGGATCGGCCTCCcg	0						3'	New	gp4	...((((..((((((((((((((((.((..((..((((......(((((...((((((........)))))))))))))))..)).)).))))))))))))))))..))))...	108	37.7	-43.1	1	2114	1688	2389	47	0	0	2092.45	1457.44	2801.2	45.523	0	0	high
64	57	PC-3p-43699_51	TTGACCAGTTAGCCTTGCAAA	21	contig_1485216	+	888	1006	atttcgcatgtgtttgcaaggctgactagtcaaacaaccaatgagcaatcaccccaaaaaatgataaacaactcattagttggTTGACCAGTTAGCCTTGCAAAcaaatgatgtgatgg	0						3'	New	gp4	...((((((.(((((((((((((((((.(((((.((((.((((((..((((..........))))......)))))).)))).))))).)))))))))))))))))....))))))...	113	39.5	-49.5	1.1	13	16	11	11	8	6	12.8675	13.8146	12.8979	10.6543	10.1507	5.67859	middle
65	58	PC-3p-22825_131	TCGGCCTTAAATGTTAGGTGAG	22	contig_2015767	+	606	763	tcgattcgatggagatgacctgttgaagggtgaaagattgttcactgacattggaggccgacgcaaacacagtctgcatactctcgcagttgtaatgTCGGCCTTAAATGTTAGGTGAGgttttttcgctctgttaacacgccatctcgccgaatgtt	0						3'	New	gp4	...(((((...((((((...(((((((((((((((((...((((((((((((..(((((((((.....((((.((((........))))))))..)))))))))..))))))).)))))..))))))))))).))))))...))))))..)))))...	152	46.8	-65.9	0.9	23	49	15	16	15	13	22.7655	42.3073	17.5881	15.4972	19.0325	12.3036	middle
66	59	PC-5p-56951_33	TGAGAATCTGGCATGAGTTGA	21	contig_1481559	+	3821	3984	cactccattatccatcatcacgaTGAGAATATGGCATGAGTTGAtagcagacttaggctcctatttaaggatgccaacatagtagagatacatggtttaaatagaaattaaagtctggaatcaactcatgccagattctcatcctaatgatggatcgcggaatg	0						5'	New	gp4	...(((...(((((((((...(((((((((.((((((((((((((..(((((((.(((((((.....)))).)))..(((.(((....))))))................)))))))..)))))))))))))).)))))))))...)))))))))...)))...	158	39	-73.9	1.2	9.5	2.5	0	4.5	0	0	9.40314	2.15854	0	4.35858	0	0	low
67	60	PC-5p-17267_190	TGAACTTCACCTCTCGGCATA	21	contig_1120253	-	1869	1960	gTGAACTTCACCTCTAGGCATAttttacatatcatgttttgatttatgtttttatatatatgtaaaatatgtagagaggtgaagtttacaag	0						5'	New	gp4	(((((((((((((((..(((((((((((((((.((((...(((....)))...)))))))))))))))))))..)))))))))))))))...	89	27.2	-45	1.8	48	38	25	31	26	33	47.5106	32.8098	29.3135	30.0258	32.9897	31.2323	middle
68	61	PC-3p-10736_339	TCTCCCAATTCCTTGGCCTTT	21	contig_298147	+	48	224	taactaatgcatatacatacttgtgacaaagttgtagaaggccaaggaactgggagatgaaagagttgctctttcatgtgctccttcaccttctggcagcgtcaagcccagactctttcaTCTCCCAATTCCTTGGCCTTTtgtaacttcatttcaagtatgcttatgcattagata	0						3'	New	gp4	...((((((((((..((((((((..(..(((((..((((((((((((((.((((((((((((((((((((......((((((((..........)).)))).)))))...))))))))))))))))).))))))))))))))..)))))..)..))))))))..))))))))))...	171	41.2	-91.2	1.2	32	71	41	90	44	61	31.6737	61.3024	48.0741	87.1716	55.8288	57.7324	middle
69	62	PC-5p-18736_171	TATGCACCTCAGTCAACGTTG	21	contig_2771654	+	4	133	gcttcactcaaTATGCACCTCAGTCAACGTTGgtcaatgcatcatgaccatccattcacctcagtcaacgtaggaatggacggtcatgatgcattgactgacgttacctgaggtgcatattgagtgaagg	0						5'	New	gp4	.((((((((((((((((((((((..(((((..(((((((((((((((((.(((((((................))))))).)))))))))))))))))..)))))..)))))))))))))))))))))).	128	46.9	-92.7	1.5	0	0	0	50	53	86	0	0	0	48.4287	67.2483	81.3932	middle
70	63	PC-3p-20451_152	TCCCTTGGTGCATGATGAGAA	21	contig_1405955	+	3748	3921	catggatcacatattttgggctggcctagattctcatcattgaccaagagaataaatgaacccatctggtttttagtgacctacagagatgctgcattaaaaacagatggttttacttgcTCCCTTGGTGCATGATGAGAAtctaagatgttctaacagatgtgatccgtgaaa	0						3'	New	gp4	((((((((((((.....(..(.....((((((((((((((..((((((.((..((.((((.(((((((.(((((((((.....(((.....))))))))))))))))))).)))).))..)).))))))..))))))))))))))....)..)......))))))))))))...	171	39.7	-72.4	1	9	41	17	54	19	18	8.90824	35.4	19.9332	52.303	24.1079	17.0358	middle
71	64	PC-5p-72926_22	AAGGACTGTGGAAACGTCGGGG	22	contig_2137530	-	1295	1364	ggggaAAGGACTGTGGAAACGTCCGGGtatggcacagactgtacccgggcgtttccacagttttttcgcc	0						5'	New	gp4	((.((((..((((((((((((((((((((..(......)..))))))))))))))))))))..)))).))	70	57.1	-52.1	1.3	0	0	0	8	5	9	0	0	0	7.74859	6.34418	8.51789	low
72	65	PC-5p-112285_10	TAGCTCCAGTTGATAAAACACA	22	contig_1363033	+	1230	1433	agctcaaggtatcttaacacaatattattaagcaaaactgatatttcagccagacatggatacTAGCTCCAGTTGATAAAACACAacatgaaatcaaatattgccacttgaaaatacatgattgtgttctgtcactggaactacattcatttttgatctaatattggccttggttagacatattgtggtgagttcccttgaagt	0						5'	New	gp4	.((((((((...((((.((((((((..((((.(((..(..(((((.....((((.((((((..(((.((((((.((((.(((((((((((...((((..........)))).....)))).))))))).)))))))))).))).)))))).))))....)))))..)..))).))))..)))))))).))))...)))))).))	203	34.3	-61.9	0.9	0	0	0	10	0	0	0	0	0	9.68573	0	0	low
73	66	PC-5p-64635_27	AACGGCTGGGCAGGTCTGGGT	21	contig_546189	-	2135	2248	tttcaggtctggaaatgccctggaAACGGCTGGGCAGGTCTGGGTactgccgtagacgtactcatctgtaccttgacatgcccagccattttcagggcatttctgggcgtgtat	0						5'	New	gp4	...((.(((..(((((((((((((((.(((((((((.(((..(((((....(((....)))......)))))..))).))))))))).)))))))))))))))..))).))...	108	53.5	-68.4	1.1	13	6	8	0	0	0	12.8675	5.18049	9.38031	0	0	0	middle
74	67	PC-5p-50928_40	ATGATCTTCCCATGTTCCACC	21	contig_492206	-	115	216	tgacgaATGATCTTCCCATGTTCCACCtgcatgtcaacatgggaagatcattatttaataggctcaatatttcatgaaggtggaacatgggaagatcattcg	0						5'	New	gp4	...(((((((((((((((((((((((((.((((......((((...((.........))...))))......)))).)))))))))))))))))))))))))	99	40.2	-52.7	1.3	9.5	5	2.5	3	0	0	9.40314	4.31707	2.93135	2.90572	0	0	low
75	68	PC-3p-56468_34	CGGAGGATAGACTTTGGCCTT	21	contig_1727811	+	375	502	aaccttgccaagggcaatgtctatcctccacacgaaatacacctttttagaaaggggcattttgccgattagtgtgtaaaaaaaaggttcatttaacgCGGAGGATAGACTTTGGCCTTggcaagagc	0						3'	New	gp4	...((((((((((.(((.(((((((((((.....((((..((((((((.......(((.....))).((......))...))))))))..)))).....))))))))))).))).))))))))))...	122	43.8	-55	1	12	12	10	0	0	0	11.8776	10.361	11.7254	0	0	0	middle
76	69	PC-3p-66821_25	CTTCAACCCTCACTGCCTTGT	21	contig_22178	+	2822	3020	atctattgaaaaaggttttgtctgacatttcgtatccaactagtagatccatcttcagggtagtgaggattgaagctagtacttggggaagaggtttatttcttctttcccaagcattggCTTCAACCCTCACTGCCTTGTagatggatccaatagttagatctgaaacatcgaacaaaaacctttctaagtagatgta	0						3'	New	gp4	(((((((...(((((((((((..((..((((..(((.(((((...(((((((((.(((((((((((((.(((((((((((.(((((((((((((.......))))))))))))).))))))))))).))))))))))))).)))))))))...))))).)))..))))..))..)))))).)))))...)))))))...	196	38.7	-103.6	1.3	6	8	0	5	6	0	5.93882	6.90732	0	4.84287	7.61301	0	low
77	70	PC-5p-59071_31	ACGGATACGTGTGGGTACCTC	21	contig_85782	+	4323	4423	tacggatacgccACGGATACGTGTGGGTACCTCccggatacatcatggatacgtgatgacgtatccgggaggtacccacacatatccgtggcatatccctt	0						5'	New	gp4	...(((((.((((((((((.(((((((((((((((((((((((((((....))))))...))))))))))))))))))))).)))))))))).)))))...	95	53.5	-78	1.4	0	6	6	7	5	7	0	5.18049	7.03523	6.78001	6.34418	6.62502	low
78	71	PC-5p-59295_31	TCACCCTTTAGCCTCTTTTCT	21	contig_387419	-	1801	1963	taaggaggaatatggtgaatctaattcatgaattcgggcttcTCACCCTTTAGCCTCTTTTCCcattgaaaaattgttttggtcaccaaaatattttccaatgggaaaaaggctagagggtgagaagcccaaattcgtgaattatatccaccattcctccccc	0						5'	New	gp4	...((((((..((((((.((.(((((((((((((.(((((((((((((((((((((.(((((((((((.(((((.(((((((...)))))))))))).)))))))))))))))))))))))))))))))).))))))))))))).)).))))))))))))...	157	40.5	-101.2	1.5	0	0	0	13	7	11	0	0	0	12.5915	8.88185	10.4108	middle
79	72	PC-3p-43747_51	TAGAAGAATGAGCATATGTC	20	contig_640903	-	1397	1470	gaatagaatgtgtatatgttcattcacataaatttatatgaaatTATAAGAATGAGCATATGTCcattctgatc	0						3'	New	gp4	...(((((((..(((((((((((((..((((.(((....))).))))..)))))))))))))..)))))))...	68	25.7	-25.7	1.4	13	7	0	9	15	7	12.8675	6.0439	0	8.71716	19.0325	6.62502	middle
80	73	PC-5p-97938_13	TATGCTGCTGGTACGTACCCA	21	contig_1625881	-	2588	2668	TATGCTGCAGGTACGTACCCAcaggtcccatgtacgagaatttgtatccgggacctgtgggtacgtatccacagtgtaccg	0						5'	New	gp4	((..(((..((((((((((((((((((((..((((((....))))))..))))))))))))))))))))..)))..))...	78	53.1	-51.8	1.2	0	0	0	5	8	0	0	0	0	4.84287	10.1507	0	middle
81	74	PC-5p-41049_56	TGTAGAAGCTACCATCATCTT	21	contig_3081433	+	101	252	tatggatcaagTGTAGAAGCTACCATCATCTTgttctattcaaatataatttgaattcccaatgtagattgttccagtggctacataaacgagattttggcatttgaaatatttgagtataaaaaaatgatgctagcttctatacttgattc	0						5'	New	gp4	...(((((((((((((((((((.((((((.((.((.(((((((((((..((..(((..((((......(((((...(((....))).)))))....)))).)))..))))))))))))).)).)).)))))).)))))))))))))))))))	149	30.9	-53.6	1.1	16	7	14	0	7	12	15.8369	6.0439	16.4155	0	8.88185	11.3572	middle
82	75	PC-3p-71113_23	TTATTGTTTGGTTGACCAGTC	21	contig_981868	-	547	683	aagagcctatccatcacatgagtttgcaaggttgactgttcaaccaacgaatgggctgtttaccattttttgaggtgaatttcTTATTGGTTGGTTGACCAGTCaaccttgtaaactcatatgatgtttaggctgag	0						3'	New	gp4	...((((((..(((((.(((((((((((((((((((((.(((((((((.(((..(..(((((((.........)))))))..)..))).))))))))).))))))))))))))))))))).)))))..))))))...	131	40.1	-81	1.5	11	7	5	0	0	0	10.8878	6.0439	5.86269	0	0	0	middle
83	76	PC-3p-106322_11	AATCCCAAAAATCATTGCTCC	21	contig_1377183	-	78	143	agattagagcaatgatttttgggattaattgtgtagggtttttAATCCCAAAAATCATTGCTCTaa	0						3'	New	gp4	...(((((((((((((((((((((((((.............)))))))))))))))))))))))))	63	30.3	-34.9	1.7	0	6	5	0	0	0	0	5.18049	5.86269	0	0	0	low
84	77	PC-5p-41266_55	TGCACGATCCCATCACATCTG	21	contig_951279	+	1434	1630	caaacatggttgcatgtttcttgcaactatcaattatcacacccacttcctttactgTGCACGATCCCATCACATTTGccaacattttatatattccatttgatcttgtataaccatgttgacaaatgtgataggatcgtgcatagtaaagacagtgtgtgtgataattaatagttgcaagaaacatgcaaccatgt	0						5'	New	gp4	...(((((((((((((((((((((((((((.(((((((((((.((((..((((((((((((((((((.((((((((((.((((((.(((((((.............)))))))..)))))).)))))))))).))))))))))))))))))..)))).))))))))))).)))))))))))))))))))))))))))	194	36	-120.5	1.7	7	9	8	9	12	17	6.92863	7.77073	9.38031	8.71716	15.226	16.0893	middle
85	78	PC-5p-147128_6	CGGATACGTGTGGGTAACTCC	21	contig_619433	-	944	1078	tccggtacggatacagatgtagatacgccaCGGATACGTGTGGGTACCTCCcagatacgtcatcacgtatccaggacgtatccaggaggtacccacacgtatctgtggcatatccgtatccgtatccgtaccagt	0						5'	New	gp4	...(((((((((((.((((..((((.(((((((((((((((((((((((((..((((((((.............))))))))..))))))))))))))))))))))))).))))..)))).)))))))))))...	129	52.6	-95.1	1.3	0	0	0	6	0	5	0	0	0	5.81144	0	4.73216	low
86	79	PC-3p-29985_89	GGCTGGTCATTCTTGGCACA	20	contig_2221105	+	1549	1708	aacaatcatgtagagttttgcatggagagatggagcgcgttactcagccaagaatgacttgcccgcatggccgagacagttataaatacagtattgtgGGCTGGTCATTCTTGGCACAgcatcatgttcacctccttatgccagactctatatgattctt	0						3'	New	gp4	...(((((((((((((((.(((((..(((...(((((.....((..((((((((((((..(((((((..((...................))..)))))))..))))))))))))..)).....)))))..)))..))))).)))))))))))))))...	154	45	-67.9	0.9	90	96	88	0	0	0	89.0824	82.8878	103.183	0	0	0	middle
87	80	PC-3p-12718_277	TATTTGTTTGGACATTTGG	19	contig_1259403	-	1579	1650	ttttctaggtgtccaagtgaataatgttctatttgttgggtggaattttTATTTGTTTGGACATTTAGatga	0						3'	New	gp4	...((((..((((((((..(((((.(((((((.......)))))))..)))))..))))))))..))))...	66	30.6	-28.7	1.3	0	0	10	53	128	86	0	0	11.7254	51.3344	162.411	81.3932	middle
88	81	PC-5p-52179_38	TTGGTATTAGAGTCTCGTTTA	21	contig_3617768	+	947	1090	catTTGGTATTAGAGTCTCGTTTAagaaagattcaaaagggagggtgggaaaattcatagaagcagaattcactgaagccatggttctcttgataatggctaaaaatctttttgaacctttcttgaatgaggctttgataccaa	0						5'	New	gp4	...(((((((((((((((((((((((((((.((((((((((..(((((....((((.........)))))))))..((((((...((....))..)))))).....)))))))))).)))))))))))))))))))))))))))	141	36.1	-60.1	1.2	16	0	0	0	19	13	15.8369	0	0	0	24.1079	12.3036	middle
89	82	PC-3p-53313_37	CACCCTGCCCCTGTGGGTACG	21	contig_401030	-	1607	1683	cacgtgggtacgtacctacaggggcagggtacgttacgggtgcagtTACCCTGCCCCTGTGGGTACGtacccacacc	0						3'	New	gp4	...(((((((((((((((((((((((((((((((.......)).).))))))))))))))))))))))))))))...	71	62.3	-61.2	1.3	5	15	0	19	15	11	4.94902	12.9512	0	18.4029	19.0325	10.4108	middle
90	83	PC-5p-66092_26	ATTAGCTTGTAGAAGGTATGC	21	contig_2918314	+	571	686	ctatctagatcgtgttggagATTAGCTTGTAGAAGGTATGCagacttccaatctgagatgggatattgcaagtttgcataccttctataagttaatctcaaacactttctagaaat	0						5'	New	gp4	...((((((..(((((.((((((((((((((((((((((((((((((.((((((......))))..)).)))))))))))))))))))))))))))))).)))))..))))))...	110	36.2	-63.7	1.5	16	9	9	0	0	6	15.8369	7.77073	10.5528	0	0	5.67859	middle
91	84	PC-3p-58019_32	ACTGCTGGACGTACCCTGGCC	21	contig_2019533	+	906	1035	tacggtatgccggggttacgctctgggtatgcccagcagtacccgggcatgtttgggtacttcccaagaagtatccagacatacccaggtACTGCTGGACGTACCCTGGCCatacccacggagaacccac	0						3'	New	gp4	...(((...(((((((...(((..(((((((.(((((((((((.(((.(((((((((((((((....))))))))))))))).))).))))))))))).))))))).)))...)))).)))...)))...	124	57.7	-82	1.1	20	8	9	7	6	8	19.7961	6.90732	10.5528	6.78001	7.61301	7.57146	middle
92	85	PC-5p-8479_437	TGGCCAACAAAGACATGGCAC	21	contig_57467	+	362	548	tttgagattacagagatctggcggctacaatgggtagaagcttattTGGCCAACAAAGACATGGCACtgcacagatcaacattacactagaaaaatgctattaatatcttgtctgttcaggtgccatgtttttgttggccgaatcagcttatatccatctaaatggcaatggagtttttttaatctt	0						5'	New	gp4	...(((((((.((((((((....((((..(((((((.(((((.(((((((((((((((((((((((((..(((((.(((.((.....(((.......))).....)).))))))))...))))))))))))))))))))))))).))))).))))))).....))))...))).))))).)))))))	184	38	-76.5	1.1	0	0	0	149	149	144	0	0	0	144.317	189.057	136.286	middle
93	86	PC-3p-42792_52	AAGGCCTGTGGGTACGTACCC	21	contig_414737	+	3029	3171	ctatgggtacgtaccctcaggccctaggtatgtacctggtatagaaaaccgtactcgagacgtacacagggcatgtgggtacgtactgggtacaaaagatcgtacctgggatatacccAAGGCCTGTGGGTACGTACCCacac	0						3'	New	gp4	...(((((((((((((.((((((...(((((((.((.(((((........(((((((..(((((((((.....)))..))))))..)))))))........))))).)).)))))))...)))))).)))))))))))))...	137	52.4	-74.2	1	6	9	7	13	9	8	5.93882	7.77073	8.20777	12.5915	11.4195	7.57146	middle
94	87	PC-3p-100225_12	TTCCCTGTAGCCATCTCGAGC	21	contig_1909002	-	1049	1245	gaagttgcaaatatcagaacttgatatttgggtcacatgattcatgtcagcaccaccttgggatccctacaggaaaagatacgttcacgtaatgacccaagtcattgcgtgttcattcctTTCCCTGTAGCCATCTCGAGCtggtagggaaatgactcatacgacatgaatatcgtcttgtgatgcctgtcttcact	0						3'	New	gp4	((((..(((..(((((.((..((((((((..(((..((((.((((.((...((((.((((((((..(((((((.((((.......(((((((((((....))))))))))).......)))).)))))))..)))))))).))))...)).)))).))))..)))..))))))))..)).)))))..)))))))...	194	44.2	-76	0.9	0	0	0	0	7	5	0	0	0	0	8.88185	4.73216	low
95	88	PC-5p-47692_44	TGTGTTTGCAAGGCTGATTGG	21	contig_386819	-	704	814	tcacaTGTGTTTGCAAGGCTGACTGGtcaaccaaccaataggctcttacccatattttgaggtagatttatcattggtggggggaccagtcaaccttataaacatatgaca	0						5'	New	gp4	...(((((((((..((((.(((((((((..((.((((((......(((((((.....)).))))).......)))))).))..))))))))).))))..)))))))))...	105	42.3	-48.8	1	0	13	6	6	7	12	0	11.2244	7.03523	5.81144	8.88185	11.3572	middle
96	89	PC-5p-26317_108	TGAGAAATGAAATTTCATCTTT	22	contig_1682557	+	1747	1843	gtagaatttgtaagaaagcTGAGAAATGAAATTTCATCTTTcattgatttaaatgagaaagatgaaattcatttatcagcaatcttataaattcgtg	0						5'	New	gp4	...((((((((((((..(((((.(((((((.((((((((((((((......)))))..)))))))))))))))).)))))..))))))))))))...	91	25.8	-40.4	1.6	12	12	5	20	35	24	11.8776	10.361	5.86269	19.3715	44.4093	22.7144	middle
97	90	PC-5p-97202_13	TGTATTTTTCATGTTGCA	18	contig_548855	+	247	425	tattgtcattatctacttctatggtttataagaatttcagatagttttttaaaaagaTGTATTTTTCATGTTGCAatggtttttatggaatctcttttttttacacgtattatcttgcaatatggaatttatatttttttatatatagaaattataaattgtgaattgtaatgatatca	0						5'	New	gp4	...(((((((((....(((.(..(((((((...(((((..(((......((((((((((((..(((((((((((((.(((...((((..................))))..))))))))))))))))..))))))))))))..))).))))))))))))..))))..)))))))))...	173	20.7	-43.7	1.2	0	0	0	0	7	6	0	0	0	0	8.88185	5.67859	low
98	91	PC-3p-85069_17	TACATACCCGCAGCGTACCCA	21	contig_995960	-	3239	3314	tgcgggtacgctgtgggtacgtacccacaggccccgggtacggggtgtgcaggTACATACCCGCAGCGTACCCAaa	0						3'	New	gp4	...((((((((((((((((.(((((..((..(((((....)))))..))..))))).))))))))))))))))...	70	64.5	-56.8	1.2	17	7	0	8	0	0	16.8267	6.0439	0	7.74859	0	0	middle
99	92	PC-3p-140069_6	AGATTGATATCTCTTGGTGTC	21	contig_171095	-	936	1123	cacgcaacaccaacgagtgctactagcatagatatcttaaatacatcctatctaaaaggcactgagagatatcaatcatgtgagaattccaataaaggcaccttgAGATTGATATCTCTTGGTGTCttttagatagatgcatttaagatatctatgctagttaccaatccattgtcaagagttgctat	0						3'	New	gp4	...(((((..(((.((.((..(((((((((((((((((((((.((((.((((((((((((((..(((((((((((((.((.(......)))...(((....)))..)))))))))))))..)))))))))))))))))).)))))))))))))))))))))...)).))..)))......)))))...	182	36.2	-85	1.2	0	5	0	6	0	0	0	4.31707	0	5.81144	0	0	low
100	93	PC-3p-52091_38	AGACCTGCCTGGCCGTATCCT	21	contig_2926086	+	35	132	tacggctaggatacggccatgcaggtccggatacggccaggtacatctgcagaagtactcagccgtacccAGACCTGCCTGGCCGTATCCTggccact	0						3'	New	gp4	...((((((((((((((((.(((((((.((.((((((..(((((.((....)).)))))..)))))).)).))))))).))))))))))))))))...	92	60.2	-70.9	1.2	0	9	4	5	0	7	0	7.77073	4.69016	4.84287	0	6.62502	low
101	94	PC-5p-49126_42	TCAAGCCAATCTACATTGACC	21	contig_876882	-	1424	1539	catgattcagctgcataattTCAAGCCAATCTACATTGACCtatattttttgtgaaccgctactcgtgaaatattgatcaatgtagattggcttgaaaccaaatggttgaatctcg	0						5'	New	gp4	...(((((((((......(((((((((((((((((((((...(((((((..(((......)))....)))))))...)))))))))))))))))))))......)))))))))...	110	36.2	-47.8	1.1	13	19	10	0	0	0	12.8675	16.4049	11.7254	0	0	0	middle
102	95	PC-3p-111854_10	TCCCACACATATCTTCACCCA	21	contig_2268505	+	568	704	gtccatgatttcaaaagagtttcttgggtaaagaattgtgttggatctttagaaaaaattatccatgatctccaacattgagttaaaagaTCCCACACATATCTTCACCCAacaatctattttgaataattatgata	0						3'	New	gp4	...(((((((((((((.((.((.((((((.((((..(((((.((((((((.((........))......(((.......)))...)))))))).)))))..)))).)))))).)).)).)))))))..))))))...	131	30.7	-38.3	0.9	0	0	0	5	0	5	0	0	0	4.84287	0	4.73216	low
103	96	PC-5p-45950_47	TCCTTGAGCCAAGATCCTCCA	21	contig_216685	+	2285	2476	gatgccatcttttgaatatcctttatttttgtttgaatattgatttggaacTCCTTGAGCCAAGATCCTCCAagaaatttgctttctccccattactagtactccaaaagagggccaatttcttggaggatcctgactcaaggagttcccaatcaatgttcatacaaaattaagggatattcatgaggtggt	0						5'	New	gp4	...(((((((..(((((((((((((.((((((.((((((((((((.(((((((((((((.((.((((((((((((((((.((..(((.....................)))..)).)))))))))))))))).)).))))))))))))).)))))))))))).)))))).)))))))))))))..)))))))	189	38	-107.8	1.5	6	7	7	11	6	10	5.93882	6.0439	8.20777	10.6543	7.61301	9.46432	middle
104	97	PC-5p-54308_36	TTCGGATCACACTCCATGATC	21	contig_1155517	+	362	460	atattttgatcaacatTTCGGATCACACTCCATGATCcatcatcaggacaacagaagatgggtgatgaaggtatgatctgatctattgattcaaaaatt	0						5'	New	gp4	...((((((((((....((((((((.(((.(((.(((((((.((.........)).))))))).)))..))).))))))))....))))).)))))...	93	35.4	-32.4	0.9	9	14	0	0	8	5	8.90824	12.0878	0	0	10.1507	4.73216	middle
105	98	PC-3p-87380_16	TACCCTGTCCCTGTGGGTACG	21	contig_1413100	-	59	146	gctggaaacgtacccatagggacagggtaaggtccgggtacggttttgccgtactcggactgTACCCTGTACCTGTGGGTACGtttcc	0						3'	New	gp4	...(((((((((((((((((.((((((((..((((((((((((.....))))))))))))..)))))))).)))))))))))))))))	85	56.8	-71.7	1.4	0	0	0	11	0	5	0	0	0	10.6543	0	4.73216	middle
106	99	PC-5p-31873_81	TGGGCAGGTCTGGGTACAGCT	21	contig_255941	-	117	186	caacTGGGCAGGTCTGAGTACAGCTgggtaagtctgcagatgtacccagccataaccggacctgcccagc	0						5'	New	gp4	...(((((((((((((..((..((((((((..((....))..))))))))..))..))))))))))))).	66	58.6	-45.2	1.1	9	30	17	5	9	11	8.90824	25.9024	19.9332	4.84287	11.4195	10.4108	middle
107	100	PC-3p-102291_12	AATATTCGGCGTGTATTCCCC	21	contig_3132012	-	401	494	catgaaaattcgcagggggaatacttgccgaatattgaatactctgcgaatattcgccAATATTCGGCGAGTATTCCCCctgcgagttttccgc	0						3'	New	gp4	...((((((((((((((((((((((((((((((((((........((((....))))))))))))))))))))))))))))))))))))))...	88	46.8	-63.3	1.4	0	0	0	6	6	0	0	0	0	5.81144	7.61301	0	low
108	101	PC-5p-11699_306	TGCAGGAGATGTTTCTGTA	19	contig_1242989	+	720	777	acTGAAGGAGATGTTTCTGTAgctctttgatttctaggccagaatcatcttcttcttc	0						5'	New	gp4	...((((((((((.(((((..((.((.........))))))))).))))))))))...	52	39.7	-20.2	0.9	118	129	169	41	45	44	116.797	111.38	198.159	39.7115	57.0976	41.643	middle
109	102	PC-5p-23449_126	TTCGAGTCTCTCTACCGGACC	21	contig_1794694	-	878	1010	ttgagtggtggtttgatcggacgtTTCGAGTCTCTCTACCGGACCcatcatcaaggagaagattgaagccaatgcttccctgatgatgggtcctgtaaagatacttgaaacgtcggattaaacaaccactgtg	0						5'	New	gp4	...((((((.((((((((.((((((((((((.(((.(((.(((((((((((((.((.((((((((....)))).))))))))))))))))))).))).))).)))))))))))).)))))))).))))))...	127	46.6	-80.2	1.3	0	9	6	91	55	56	0	7.77073	7.03523	88.1402	69.786	53.0002	middle
110	103	PC-3p-42412_53	ACGTTGACTGAGGTGCATATT	21	contig_400313	-	1762	1871	acagctaagcttcacttaatatgcacctcagtcaacgctagtcaatgcaggatggtcaagatgcattaaccaGCGTTGACTGAGGTGCATATTgagtgaagggtagccct	0						3'	New	gp4	...((((..((((((((((((((((((((((((((((((.((.((((((............)))))).)).))))))))))))))))))))))))))))))..))))...	104	46.4	-68.7	1.3	0	0	0	12	7	7.5	0	0	0	11.6229	8.88185	7.09824	middle
111	104	PC-3p-5720_650	TTGAAATCTGCAAATCTGGGTT	22	contig_3612077	-	423	523	ggttgactctctaggggaagcccagtttgaagatttcagtttcatggatggtgatgataaaTTGAAATCTGCAAATCTGGGTTcccccttgagaatcatga	0						3'	New	gp4	...(((.((((.(((((.(((((((((((.(((((((((((((((........))))..))))))))))).)))).))))))).))))).)))).)))...	95	42.6	-46.6	1.1	0	0	0	238	243	551	0	0	0	230.52	308.327	521.484	middle
112	105	PC-3p-18298_176	TGGATTCCTTGAGTGCAACAT	21	contig_1618865	+	1009	1212	aaaaataaaaaataaaaagcttactaggggctatgtagccaatagatcctcttagggccaatgttgtacttagagaatccatgaagtttgtatccaaattgactggtgctacaaactctaTGGATTCCTTGAGTGCAACATtgaccctaagagaatctattagctacatagcccgtgataagttttttttttaatatttttttt	0						3'	New	gp4	(((((((..(((.((((((((((..(.((((((((((((.(((((((.(((((((((.((((((((((((((..((((((((..((((((((.(((.......)))...))))))))..))))))))..)))))))))))))).))))))))).))))))).)))))))))))).)..)))))))))).)))..)))))))...	201	33.3	-105.3	1.5	22	40	27	50	25	37	21.7757	34.5366	31.6585	48.4287	31.7209	35.018	middle
113	106	PC-3p-187803_5	TTGTTTCCAGATAGATTTGCC	21	contig_88531	-	1174	1258	tgataaatctatctggaaacaactgttttcatattctctctgtatgagaggatttgaatacagTTGTTTCCAGATAGATTTGCCa	0						3'	New	gp4	.(..((((((((((((((((((((((.((((.((((((((.....)))))))).)))).))))))))))))))))))))))..).	83	32.9	-50.8	1.8	0	5	0	0	5	0	0	4.31707	0	0	6.34418	0	low
114	107	PC-3p-113564_10	ATACCTCTCGGCATCTTTTAC	21	contig_1521129	+	563	689	cacataaatgtatgtaaaagatgttgagaggtattattttcaaggtgcctattccacttatgtctcaaatttaaaatagatgcctcgagaataATACCTCTCGGCATCTTTTACatagatttatcta	0						3'	New	gp4	...((((((.(((((((((((((..((((((((((((((((.((((..(((((.....................)))))..)))).))))))))))))))))..))))))))))))).))))))...	121	31.5	-57.4	1.4	5	0	0	0	0	5	4.94902	0	0	0	0	4.73216	low
115	108	PC-3p-11652_308	GTGTTGTCTTTCGTTGTCACC	21	contig_3058924	-	243	337	agctcaggtgacaacgagagagagcacgcttgtcagcattcatgcaggagacatggctgtttacaggaGTGTTGTCTTTCGTTGTCACCtgattt	0						3'	New	gp4	...((((((((((((((((((.(((((.(((((.((((..((((.......))))..)))).))))).))))).))))))))))))))))))...	89	48.4	-54.3	1.2	150	233	73	51	74	22	148.471	201.176	85.5953	49.3972	93.8938	20.8215	middle
116	109	PC-5p-97959_13	TTGTCGTGTCTTCTTGTCTAG	21	contig_2354772	+	946	1090	tcttggatgtgatgctggcatcactgactgTTGTCGTGTCTTCTTGTCTAGcaatctgatacttttgaggtgcaagatctctagacggagattgctagataagatgagatgatagtggtttatgatgccaccattacatccaccc	0						5'	New	gp4	...(((((((((((.((((((((..(((..(((((((.((.((((((((((((((((.....(((.(((((.....))))).)))...)))))))))))))))).)).)))))))..)))..)))))))).)))))))))))...	139	43.4	-75.4	1.2	0	0	0	0	16	5	0	0	0	0	20.3014	4.73216	middle
117	110	PC-5p-16730_198	TAAGTACCCACAGGTCCCGGG	21	contig_2841604	-	1405	1545	cttgtgggtatgttgcgggTACGTACCCACAGGTCCCGGGtacagtccggatatggcacaagtcttgggtacagaaatccatacctagaccatacttgggacatgtgggtatgtaccaactggcaacaacgtatccacaac	0						5'	New	gp4	.((((((((((((((..((((((((((((((.(((((..(((..(((..(.(((((......(((.(....))))...))))).)..)))..)))..))))).)))))))))))))).........)))))))))))))).	139	51.1	-70.2	1	0	15	6	89	65	33	0	12.9512	7.03523	86.203	82.4743	31.2323	middle
118	111	PC-5p-14001_247	TTAGCCAAGAATGAGTTGCC	20	contig_3897427	+	1528	1669	atcttgtattaagaggccaagcgtgctacTTAGCCAAGAATGACTTGCCcatacaatggaattatattggaatagaaacaatattataatatgggcaagtcattctttggtgaagcatgcgctcggtttcccattacagaca	0						5'	New	gp4	...(((((....((..((..(((((((.....(((((((((((((((((((((..(((.....((((((.........)))))))))..)))))))))))))))))).)))..)))))))....))..))....)))))...	136	38.7	-55.4	1	90	148	106	0	0	12	89.0824	127.785	124.289	0	0	11.3572	middle
119	112	PC-5p-44879_49	TTAGGATGACTAAGGGGGAGT	21	contig_2836931	-	846	975	atgggtaagtgatgaaatgtcctcTTAGGATGACTAAGGGGAAGTaagtgtatgtgaaatgacttgtgtcatctatgggctcactccctttcccgtagtcatcataagatgacatcagtaattaaccata	0						5'	New	gp4	((((.(((....(((..((((.(((((.((((((((.(((((((..((((........(((((....))))).........))))..))))))).)))))))).))))).)))))))....))).)))).	129	40	-49.7	1	9	0	8	14	9	9	8.90824	0	9.38031	13.56	11.4195	8.51789	middle
120	113	PC-3p-97506_13	TCACCCAACTTGAATATCCAG	21	contig_2795926	-	71	226	taagtgatatgtaactgggtattcaaattgggtgattactgcaccaagcacaaaatcagatgcatcaaactagatctcaaaagggttctgatgcatctgagtcagtgcttggtgcaacaaTCACCCAACTTGAATATCCAGgtacatatcactcaa	0						3'	New	gp4	..(((((((((((.((((((((((((.((((((((((..((((((((((((....((((((((((((.....((.(((....))).))))))))))))))....))))))))))))..)))))))))).)))))))))))).)))))))))))...	151	39.7	-93.8	1.5	0	0	0	8	0	5	0	0	0	7.74859	0	4.73216	low
121	114	PC-3p-145_12477	TTTCCCTCATAAATCGCCCCT	21	contig_2781330	-	1401	1518	aacaagctgccatgtcgagtggggtgatttttatgaggcgaaaagaaggctgaatctgaatatcttttaattttcttccTTTCCCTCATAAATCGCCCCTcacgacttgcagctttga	0						3'	New	gp4	...(((((((...((((...(((((((((..(((((((.((((.(((((..((((.((((.....))))))))))))).))))))))))))))))))))...))))..)))))))...	112	42.4	-49.7	1	3570	3409	876	2881	1134	2055	3533.6	2943.38	1027.14	2790.46	1438.86	1944.92	high
122	115	PC-3p-22331_135	TGTCCCTGTGGGTACGTTTCC	21	contig_779072	-	877	971	cggttggaaacgtatccacagggacagggtacggtccgggtacggttaccatgtccccggaccgtaccaTGTCCCTGTGGGTACGTTTCCaggct	0						3'	New	gp4	.(((((((((((((((((((((((((.(((((((((((((.(((.......))).))))))))))))).))))))))))))))))))))))).))	94	60	-74.9	1.3	31	33	8	46	30	28	30.6839	28.4927	9.38031	44.5544	38.0651	26.5001	middle
123	116	PC-3p-109932_10	ATACCTCTTGGCATCTTTTAC	21	contig_2820525	-	260	418	aaataacatacatatcatacataaatctatgtaaaagatgtcgagaggtagcattctcaaggtgcccaatttgcttgtcacaaatacaaaataagtgccttgagaatgATACCTCTTGGCATCTTTTACatagattnnnntaagataggtatgttagta	0						3'	New	gp4	...((((((((.((((.((....(((((((((((((((((((((((((((.(((((((((((..(....((((.............))))....)..))))))))))).)))))))))))))))))))))))))))....)).)))).))))))))...	153	31.4	-76.4	1.5	5	0	0	5	0	0	4.94902	0	0	4.84287	0	0	low
124	117	PC-5p-44308_50	TACGTACGGAAACCTCCCGGA	21	contig_484415	-	863	954	tgagggaTACGTATGGAAACCTCCCGGAtatgtcatggatacgtgcccacgtatccgtgatgtatccgggaggttttcgtacgtatcccatg	0						5'	New	gp4	...(((((((((((((((((((((((((((..((((((((((((....))))))))))))..)))))))))))))))))))))))))))...	86	51.1	-75.6	1.6	7	0	6	21	14	12	6.92863	0	7.03523	20.34	17.7637	11.3572	middle
125	118	PC-5p-55478_35	AAACTACCATTAGCTATCAAA	21	contig_252738	-	1076	1266	gttgtttgctgcacctccagaaagtagtctataaaattgacatggaatgtggaAAACTACCATTGGCTATCAAAataataataacagaatctccagtgagcactgaatttatttgatagctaatggtagtttccacattccttgcattttatgtcagcacgagagattttaaatttggtgtagcagactct	0						5'	New	gp4	...((((((((((((.....(((((..(((......((((((((((((((((.((((((((((((((((((((....((((...(((...(((....)))..)))...))))))))))))))))))))))))))))))))).........)))))))....))).)))))......))))))))))))...	185	35.6	-77.1	1.1	0	3.5	2.5	0	4.5	7	0	3.02195	2.93135	0	5.70976	6.62502	low
126	119	PC-3p-49714_41	TAGGGCCTGTGGGTACGTACC	21	contig_267950	+	1035	1126	gctgtgggtatgtacccacaggtcctggatatgctctgggtacagaaaaccgtacctgggatgtactTAGGGCCTGTGGGTACGTACCcaca	0						3'	New	gp4	..(((((((((((((((((((((((((..(((..((..(((((........)))))..))..)))..)))))))))))))))))))))))))	90	54.3	-64.5	1.3	7	11	0	13	5.5	5	6.92863	9.49756	0	12.5915	6.9786	4.73216	middle
127	120	PC-3p-150910_6	GGATGAACTCTTTTACCCTT	20	contig_2608852	+	984	1049	tttgggtgtaaggttttatcctttggtcacaatcatgtatcatgtGGATGAAATCTTTTACCCTTt	0						3'	New	gp4	...((((..((((((((((((..((((.(((....)))))))...))))))))))))..))))...	60	34.8	-24.5	1.1	0	0	0	6	5	0	0	0	0	5.81144	6.34418	0	low
128	121	PC-5p-34110_73	ATCATTGAGTTTGGTGGTCCA	21	contig_454329	-	1686	1809	tcaagtgccatcgATCATTGAGTTTGGTGGTCCAtgcgagttttgctaatagtcatatcagctgtcccaagtactatagcaaacctctcatggatcaccccattcaaagatcaaaggcactaaa	0						5'	New	gp4	...((((((...((((.((((((..(((((((((((.(((.(((((((.((((.......(((......)))))))))))))).))).)))))))))))..)))))).))))...))))))...	118	42.7	-55.2	1	8	12	8	20	7	18	7.91843	10.361	9.38031	19.3715	8.88185	17.0358	middle
129	122	PC-3p-38454_62	TAGGGCATGTGGGTACGTACC	21	contig_2036847	-	55	145	ctatgggtatgtacccacaggccttgggtacgttccaagtacagaaaactgtacctgggacataccTAGGGCATGTGGGTACGTACCcaca	0						3'	New	gp4	...((((((((((((((((.((((((((((.((((((.((((((....)))))).)))))).)))))))))).))))))))))))))))..	86	51.6	-65.6	1.4	11	6	6	13	13	13	10.8878	5.18049	7.03523	12.5915	16.4949	12.3036	middle
130	123	PC-5p-19119_166	CAGACTTCCACATCTTGAGCC	21	contig_2134950	-	698	883	ttttagcttctcagaaatcacttaatctgctattgaacttctataCAGACTTCCACATCTTGAGCCtgatttctatgaacctacccaagacatacaaaccagtacagggtgtgatagaaattaggtccaagacgtggaagtctatacaaatgtttaataacaagttaagtgatttatgaggagctg	0						5'	New	gp4	...((((((((((.(((((((((((..((.((((((((.....((.((((((((((.(((((..((((((((((((..((..((((...((..........))...)))))).))))))))))))..))))).)))))))))).)).....)))))))).))..))))))))))).))))))))))	183	36.6	-84	1.2	28	60	37	23	15	14	27.7145	51.8049	43.3839	22.2772	19.0325	13.25	middle
131	124	PC-3p-69572_24	CTGACCATTCAACCTTGCAAA	21	contig_1125389	-	361	471	tgacatatgtttggaaggttggatggttaaccaatccatgtgttgtctattaattttttggggtgttttttgattagttggTTGACCATTCAACCTTGCAAAcatatgcga	0						3'	New	gp4	((.((((((((((.((((((((((((((((((((((((...((((.....))))....)))...(((....)))..))))))))))))))))))))).)))))))))))).	110	36	-48.1	1.2	0	0	0	6	9	9	0	0	0	5.81144	11.4195	8.51789	middle
132	125	PC-3p-19077_167	CCTATCCAATGTATCTTTCCTA	22	contig_1424532	+	849	969	taatgtagaaagtagggaagattattggatagaagaagagcttgatatagcaaaaactgcatctcctagtgaagactaagcccttctCCTATCCAATGTATCTTTCCTAtttcctgcatca	0						3'	New	gp4	..((((((.(((((((((((((((((((((((.(((((.(((((.....(((.....))).(((........))).))))).))))).)))))))))).))))))))))))).))))))..	117	37.2	-50	1.1	26	21	6	50	19	45	25.7349	18.1317	7.03523	48.4287	24.1079	42.5894	middle
133	126	PC-3p-114962_10	TGTGCCCAGGGCCTGTGGGTA	21	contig_713650	-	912	977	acccacaggccccgggtacggttttccatatccgggaTGTACCCAGGGCCTGTGGGTAtgtaccca	0						3'	New	gp4	((((((((((((.(((((((...((((......))))))))))).)))))))))))).........	57	60.6	-42.1	1.1	0	10	0	8	0	0	0	8.63414	0	7.74859	0	0	low
134	127	PC-3p-6928_539	TTGATCAAATTGAGCCGTGCC	21	contig_3918999	-	816	918	gaatgaacgtgtgatagtggcgcggttcaatcggatcactctgttggtttttgtatccaatattTTGATCAAATTGAGCCGTGCCaatatcacacatttactt	0						3'	New	gp4	...((((.((((((((.((((((((((((((..(((((...((((((.........))))))...)))))..)))))))))))))).)))))))).))))...	97	39.8	-49.7	1.2	8	0	0	294	123	145	7.91843	0	0	284.761	156.067	137.233	middle
135	128	PC-3p-20014_157	TCAAGGCTGCACTCAATAATG	21	contig_4338238	+	461	564	taacaaatacatcattgagtgcagcgttgattggatttgaatgaactgctctgatgattattctgcaataactgTCAAGGCTGCACTCAATAATGcgtttgcat	0						3'	New	gp4	...((((..(((.((((((((((((.(((((.....(((...(((....((....))...)))..))).....))))).)))))))))))).)))..))))...	98	37.5	-36.7	0.9	10	11	59	27	32	41	9.89804	9.49756	69.1798	26.1515	40.6027	38.8037	middle
136	129	PC-5p-2743_1284	TCGTTGAGGGCAGCGTTGATA	21	contig_4553829	-	330	436	taacaaatgcaTCGTTGAGGGCAGCGTTGATAtttcaatatgtcagctggtctgcattggttgcttacattagaatttcaatgctgctctcaataatgtgtttggaa	0						5'	New	gp4	...((((..(((..((((((((((((((((...(((...((((((((..((....))..))))...))))..)))..))))))))))))))))..)))..))))...	101	38.3	-47.6	1.2	185	591	512	0	5	10	183.114	510.278	600.34	0	6.34418	9.46432	middle
137	130	PC-3p-73586_22	AGGGCCTGTGGATACGTACCC	21	contig_157716	-	29	175	gtggtactagtactctctgggtactctgtgggtacatacccacaggctctgggtacgtaccaagtatggaaaaccgtaaccgggatgtacctAGGGCCTGTGGATACCTACCCacagcttacccacatggttttttttaagtgcaaa	0						3'	New	gp4	...(((((...(((...((((((..(((((((((..((.(((((((((((((((((((.((...(((((....)))))....))))))))))))))))))))).))..)))))))))..))))))...)))........)))))...	141	49	-74.5	1	0	0	0	9	8	5	0	0	0	8.71716	10.1507	4.73216	middle
138	131	PC-3p-67884_25	TTCCCATAGCCATCCTAAGCC	21	contig_3026373	-	1174	1370	caaattgtaggtactatatcccatcgtcctttcgatagaatcctacccgtgctggcttaggatggctatgcgaaagagagtgaccacgtaatgaatttcatcattacgtcctcactacccTTCCCATAGCCATCCTAAGCCagcacgggtaggattctattgaaaggatgatgggatatagtacctacaatttgttt	0						3'	New	gp4	((((((((((((((((((((((((((((((((((((((((((((((((((((((((((((((((((((((.(((....(((((..(((((((((......)))))))))..)))))....))).))))))))))))))))))))))))))))))))))))))))))))))))))))))))))))))))))))))...	194	43.7	-154.6	1.8	7	13	0	0	0	5	6.92863	11.2244	0	0	0	4.73216	middle
139	132	PC-3p-86841_16	TGGTGTTTTACTTGCATGAAA	21	contig_525553	-	229	297	aaagtttcttgtaggtataacaccatgatttaggaataaaaacaTGGTGTTTTACTTACATGAAAcatt	0						3'	New	gp4	...(((((.((((((((.(((((((((.((((....))))..))))))))).)))))))).)))))...	63	27.5	-28.7	1.5	8	0	8	0	0	0	7.91843	0	9.38031	0	0	0	low
140	133	PC-3p-23175_128	TGAAGAATGGCAGAGCCGGTC	21	contig_1125809	+	197	293	cagtggtagttttgaagactggcctagcctgtcttcaaaacatccatcaaatgacagtttTGAAGAATGGCAGAGCCGGTCttcaaaacttccagtc	0						3'	New	gp4	...(((.((((((((((((((((((.(((..((((((((((...(((...)))...))))))))))..))))).)))))))))))))))).)))...	91	44.3	-48.5	1.1	7	18	17	29	30	27	6.92863	15.5415	19.9332	28.0886	38.0651	25.5537	middle
141	134	PC-3p-23607_125	TTTGGCACATTTCCGGGCATT	21	contig_848446	-	317	424	aggttgggagaaatcctggaaatgcctgggcatgtgtcaaaaacggaattgccagttccgtgccattTTTGGCACATTTCCGGGCATTtccaggacatttcctggtgt	0						3'	New	gp4	..(..((((((..((((((((((((((((..((((((((((((((((((.....))))))).....)))))))))))..))))))))))))))))..))))))..)..	104	49.1	-61.3	1.2	25	25	9	32	16	18	24.7451	21.5854	10.5528	30.9944	20.3014	17.0358	middle
142	135	PC-3p-71839_22	TTTTTTCAATACCACCTATACC	22	contig_3148694	+	619	764	aatggactgctggtaaaagatttgttgtggaaagaaggctttgggtgtaggtgtattgataaaactcagttcatgttttaagaagagTTTTTTCAATACCACCTATACCtacagttttcgccacaattcctttatcagagtctcac	0						3'	New	gp4	...(((((.((((((((.((...(((((((...(((..((.((((((((((((((((((.(((((((..(((.........)))))))))).)))))).)))))))))))).))..))).))))))))).)))))))))))))...	140	37	-61.4	1.1	0	0	22	0	0	0	0	0	25.7959	0	0	0	middle
143	136	PC-3p-49621_42	TACTGCTGGATGTACCTTGGC	21	contig_1470538	+	925	1056	atgtggtacgccctgggtacggtcagggtacgtccaacagtacccaagtatgcttgggtacttctcaggaagtacccatgcatactcgggTACTGCTGGACGTACCTTGGCcatacccagggcgtaccaaac	0						3'	New	gp4	...((((((((((((((((.((((((((((((((((.((((((((.(((((((.((((((((((....)))))))))).))))))).)))))))).)))))))))))))))).))))))))))))))))...	126	55.3	-111.9	1.5	17.5	9	0	17	11	11	17.3216	7.77073	0	16.4657	13.9572	10.4108	middle
144	137	PC-3p-41599_55	CAGGGCCTGTGGGTACGTACC	21	contig_1621780	+	1968	2067	tacgttgtgggtacgtacccataggccctgggtatgtcctgcgtatgggaatccgtaccagggaagtaccCAGGGCCTGTGGGTACGTACCcacaatttt	0						3'	New	gp4	...((((((((((((((((((((((((((((((((.(((((.((((((....)))))))))))..))))))))))))))))))))))))))))))))...	94	55	-81.9	1.5	10	13	15.5	23	2.5	16.5	9.89804	11.2244	18.1744	22.2772	3.17209	15.6161	middle
145	138	PC-5p-68739_24	TCTGGAACAAGCTGCATCTAC	21	contig_35344	-	1146	1290	aaatctTCTGGAACAAGCTGCATCTACtttgttatttacctacattttaagtcacatacagtgctcatcatcagggtaatgaagtccttatgtggttcgaactatcggtgattaaatagtatatgcaacttattccagaagactt	0						5'	New	gp4	...((((((((((.(((.(((((.((((...(((.(((((.....((..(..((((((.((..(((((.((....)).))).))..))))))))..)..)).....))))).)))..)))).))))).))).))))))))))...	139	35.2	-48.3	0.9	5	0	0	0	6	13	4.94902	0	0	0	7.61301	12.3036	middle
146	139	PC-3p-48630_43	TGTGCTGAATCCAGACGCTCC	21	contig_4285127	+	812	928	gcatattcattgtatcaggagcttctggattcaccacatacaatttttaggttctaatgttatgaaccaaaactttgatTGTGCTGAATCCAGACGCTCCtgattcaaaaaatatat	0						3'	New	gp4	..(((((..(((.(((((((((.((((((((((.((((..(((..(((.(((((.........))))).)))..)))..)))).)))))))))).))))))))).)))..)))))..	113	34.2	-50.9	1.3	5	5	8	21	7	13	4.94902	4.31707	9.38031	20.34	8.88185	12.3036	middle
147	140	PC-3p-130269_7	TTGTTGCGTTGGACCCACTTT	21	contig_3198986	+	1328	1496	agcacaacttagatgggtggaaaagaaagtgggtccaatgcaacaaagcctaatgaggcacctatttctccttttctaacaaagatagagcaaaaggagaaatgggtgcctcatcaggctTTGTTGCGTTGGACCCACTTTcttttccacccacctaagttgtgcttac	0						3'	New	gp4	((((((((((((.((((((((((((((((((((((((((((((((((((((.((((((((((((((((((((((((((.......))))...)))))))))))))))))))))).)))))))))))))))))))))))))))))))))))))).))))))))))))...	166	44.4	-134.1	1.8	3	2.5	0	0	3.5	0	2.96941	2.15854	0	0	4.44093	0	low
148	141	PC-5p-81069_18	TAGGGTGCAGCAGAACAGACC	21	contig_232487	-	895	997	ccgtgggttggcaTAGGGTGCAGCAGAACAGACCcgggtacatccttgggtggtccaaggacataccctggtccattctgctgtacactgtgtgtgcccagct	0						5'	New	gp4	...(((((..((((((.(((((((((((..((((.(((((..((((((((...))))))))..))))).))))..))))))))))).))))))..)))))...	97	58.3	-63.9	1.1	0	5	6	0	0	7	0	4.31707	7.03523	0	0	6.62502	low
149	142	PC-3p-67138_25	ACTGCTGGACGTACCCTGGGT	21	contig_1794447	+	1	83	agccagggtatgtccagcagtacctaggtacgctccaggaagtacccagacgtacccaggtACTGCTGGACGTACCCTGGGTg	0						3'	New	gp4	..(((((((((((((((((((((((.((((((.((..((.....))..)))))))).)))))))))))))))))))))))...	78	59	-61.4	1.3	6	8	6	0	5	0	5.93882	6.90732	7.03523	0	6.34418	0	low
150	143	PC-5p-107459_11	TCAAGTTATCTATGCAAGGTC	21	contig_1994081	-	1468	1668	ttcaagagtttccaaagttgtagaacatcagtgtgcaagctgtagaaaaactggagtagaTCAAGTTATCTATGCAAGGTCaaggattatggcctcttggtatggtgaaggttgtaatctttgacattgcataggtaacttgatctacataggtctttgtacgacttgagtattgtttttctacatcttttgaaaccctta	0						5'	New	gp4	...(((.(((((.((((.(((((((...(((((..((((..(((.(((.(((...((((((((((((((((((((((.(((((((((((..(((((..........).))))..))))))))))).))))))))))))))))))))))...))).))).)))..))))..)))))...))))))).)))).))))).))).	197	36.8	-93.3	1.3	0	0	0	0	5	6	0	0	0	0	6.34418	5.67859	low
151	144	PC-3p-93915_14	TTGGTCCAAACCGTAGAACCC	21	contig_1525588	-	253	372	caacacacacaaacgtggtgggccctatggtctgcaccaatgagaaaataggaataaattaattttttttaaatttttcaTTGGTCCAAACCATAGAACCCaccacgtttgtgcgtgcta	0						3'	New	gp4	...(((.(((((((((((((((..(((((((.((.((((((((((((....(((.(((.....))).)))...)))))))))))).)).)))))))..))))))))))))))).)))...	114	39.2	-60.4	1.3	0	0	0	8	6	0	0	0	0	7.74859	7.61301	0	low
152	145	PC-5p-94646_14	TCACTCAATATGCACCCGGTC	21	contig_463942	+	1400	1518	cggctaatctTCACTCAATATGCACCCGGTCaactcctgtcaatacattataatggacggtcataatgtaacgtgttgacagggattgaccgggtgcatattgagtgaaagaatggaca	0						5'	New	gp4	...(((.((((((((((((((((((((((((((..(((((((((((.(((((((((....))))..))))).)))))))))))..)))))))))))))))))))))))).)).)))...	113	43.7	-71.4	1.4	0	0	8	0	0	6	0	0	9.38031	0	0	5.67859	low
153	146	PC-3p-114611_10	CCAGTTAGCCTTGCAAACTCA	21	contig_494566	+	1271	1377	acatgagtttgcaaggctgaatggtcaaccaatcaatgataaattaaccccaaaaagcggtaaacaacgtagtggttggttgaCCAGTCAGCCTTGCAAACTCAcct	0						3'	New	gp4	...(((((((((((((((((.((((((((((((((...........(((.........)))...........)))))))))))))).)))))))))))))))))...	101	43	-55.7	1.2	0	0	0	10	0	0	0	0	0	9.68573	0	0	low
154	147	PC-5p-52246_38	TGCCAAGAATGGCTTGCCCAC	21	contig_66106	+	1184	1312	tacgaggcggagcgtgttactcAGCCAAGAATGGCTTGCCCACactatgttaggaaagtgtctgatgtagattacagtcgattaaagtgagcaagccattgttggtttagcatcaccttctgcttttca	0						5'	New	gp4	...((((((((..(((...((.((((((.((((((((((.(((.(((..(((((......)))))..))).(((........))).))).)))))))))).)))))).))...)))..))))))))...	123	45	-49.7	0.9	0	0	0	10	12	16	0	0	0	9.68573	15.226	15.1429	middle
155	148	PC-3p-4169_893	TTTTCCCACCGCCTCCCATT	20	contig_2011783	+	1205	1312	atttggctgtaaatggagtgggaatgtggggggaaagtttagacgagagacacttgtacagctctaattaaaTTTTCCCACCGCCTCCCATTtcaggtatggccattg	0						3'	New	gp4	...((((..((..((((((((((..((((.((((((((((((...((((............))))..)))))))))))).)))).))))))))))..))..))))...	102	45.4	-50.1	1	236	223	279	196	171	212	233.594	192.541	327.138	189.84	216.971	200.644	middle
156	149	PC-3p-94121_14	AATGTGATGGGATCGTGCACA	21	contig_951279	-	1369	1563	catggttgcatgtttcttgcaactattaattatcacacacactgtctttactatgcacgatcctatcacatttgtcaacatggttatacaagatcaaatggaatatataaaatgttggcaAATGTGATGGGATCGTGCACAgtaaaggaagtgggtgtgataattgatagttgcaagaaacatgcaaccatgttt	0						3'	New	gp4	((((((((((((((((((((((((((((((((((((((.((((..(((((((.((((((((((((((((((((((((((((..(((((.....((.....))...))))).)))))))))))))))))))))))))))).)))))))..)))).))))))))))))))))))))))))))))))))))))))...	192	35.9	-128	1.8	0	0	0	0	8	6	0	0	0	0	10.1507	5.67859	middle
157	150	PC-3p-63693_28	ATACCTCTCGGTGTCTTTTAC	21	contig_688836	-	1917	2052	tcttagataaatgtatgtaaaagatgctgagaagtatcattctcgaggtgcctaattcacttatgtctcaaatccaatatagttgcctctagaatgATACCTCTCGGTGTCTTTTACatagatttatcttagatag	0						3'	New	gp4	(((.((((((((.(((((((((((..((((((.((((((((((.(((((..(((.........................)))..))))).)))))))))).))))))..))))))))))).)))))))).)))...	133	33.8	-61.6	1.3	0	9	0	14	0	5	0	7.77073	0	13.56	0	4.73216	middle
158	151	PC-5p-57687_33	AATGAAGACTGGGTCAAGATA	21	contig_1291062	+	178	289	gcagagttgtggtgtttggAATGAAGACTGGGTCAAGATAttatttggcggctacccactctggtttccaactatctcggaccaggcttcattcctgccgtcacaactcttt	0						5'	New	gp4	..(((((((((..(...(((((((((.((((..(.(((((....((((..((((.......))))..)))).))))).)..)))).)))))))))...)..)))))))))..	108	48.2	-48.3	0.9	0	0	0	13	13	7	0	0	0	12.5915	16.4949	6.62502	middle
159	152	PC-3p-43724_51	AGGGCCTGTGGGTACGTACCC	21	contig_2425835	+	1306	1458	accctgtgggtatgtacccacaggtcctggatatgctctgggtacagaaaaccgtacctgggatgtacttAGGGCCTGTGGGTACGTACCCacagctacccacatggtttttttttaagtgcaaaaacataaataaaacttgagggctttgac	0						3'	New	gp4	...((((((((((((((((((((((((((..(((..((..(((((........)))))..))..)))..))))))))))))))))))))))))))...(((.((.((((((..((((.((......)).)))).)))))))).))).......	92	46.4	-78.4	1.1	0	6	10.5	14	8	14.5	0	5.18049	12.3117	13.56	10.1507	13.7233	middle
160	153	PC-5p-103636_12	ATGGGCTAAGAGTCTTCGACT	21	contig_6338	+	354	537	tatagttttcctttttatcaccccttagtcgtcgagaaacaaaATGGGCTAAGAGTCTTCGACTgggaaggggatattacccttagcccaatccctttcattttataatatccccttcccagtcgaagacccttagcccaattntgtttcctgacggctaaggggtgataaaaaaggaaactct	0						5'	New	gp4	...(((((((.((((((((((((((((((((((..((((((.(.(((((((((.(((((((((((((((((((((((((..........................))))))))))))))))))))))))).))))))))).)..))))))..)))))))))))))))))))))).)))))))..	179	42.4	-116.6	1.5	0	0	0	7	5	0	0	0	0	6.78001	6.34418	0	low
161	154	PC-5p-81514_18	ATAGATCCTCTTAGGGCCAAT	21	contig_1618865	+	1025	1190	aagcttactaggggctatgtagccaATAGATCCTCTTAGGGCCAATgttgtacttagagaatccatgaagtttgtatccaaattgactggtgctacaaactctatggattccttgagtgcaacattgaccctaagagaatctattagctacatagcccgtgataag	0						5'	New	gp4	...((((..(.((((((((((((.(((((((.(((((((((.((((((((((((((..((((((((..((((((((.(((.......)))...))))))))..))))))))..)))))))))))))).))))))))).))))))).)))))))))))).)..))))	163	41	-95.7	1.4	0	0	0	25	0	13	0	0	0	24.2143	0	12.3036	middle
162	155	PC-5p-17842_182	TTTGGGTCTATCTTCTAGATC	21	contig_4331121	-	216	380	ctatgttcaacccacttacttaccaacatTTTGGGTCTATCTTCTAGACCcctcttcaaggataaattagatcatagaaaatgtatccaatttacccctgaagaggagtctagatgatagacccaaaatgtcggtaaagtatactgtgtagtggattgaacacaa	0						5'	New	gp4	...(((((((.(((((((((((((.((((((((((((((((.(((((((.((((((((.((.((((((.((((((.....))).))).)))))).)).)))))))).))))))).)))))))))))))))).))))).)))........))))).)))))))...	159	37.6	-82	1.3	25	21	26	46	49	40	24.7451	18.1317	30.486	44.5544	62.173	37.8573	middle
163	156	PC-3p-46867_45	TGGCTGTACCTTGGCTGTTTC	21	contig_1901254	-	272	379	tgtgcctagaaatgcccagtgtatggacggagcggtccgcatatgtctgcaaacgtatccgggcatacccggtcctctcTGGCCGTACCTTGGCTGTTTCtgggccaa	0						3'	New	gp4	((.(((((((((((((.((.((((((.(((((.((.(((..((((((((..........))))))))..))).)).))))).)))))))).))).)))))))))))).	107	57.4	-55.7	0.9	7	9	0	6	8	15	6.92863	7.77073	0	5.81144	10.1507	14.1965	middle
164	157	PC-5p-60935_30	TCCTCTCCCTCAACGGTTTCCT	22	contig_265020	-	1288	1422	gctggaagaagtgtttcttTCCTCTCCCTCAACGGTTTCCAatgattttgtctgaaatttttgattttttacaaaatgttgaggaaggcagttttggatgccgttggggaggggaaaaatcaactatctttcaaa	0						5'	New	gp4	..((((((((((.....(((((((((((.((((((..(((((.....((((((..((((((((........))))).))).....))))))..)))))..))))))))))))))))).....))).)))))))..	131	38.5	-52.6	1	5	7	0	9	0	16	4.94902	6.0439	0	8.71716	0	15.1429	middle
165	158	PC-5p-137010_7	TACGGCCAGGGTACATCCAGC	21	contig_425218	+	243	341	ctgggTACGGCCAGGGTACCTCCAGCaatgcttgggatcatgccggtatgtcccatgatgtacttggacactattggaggtacccctggccgtatcgtt	0						5'	New	gp4	...((((((((((((((((((((((.......(((((.((((....)))))))))...(((......)))...))))))))).)))))))))))))...	93	55.6	-52	0.9	0	13	0	0	0	0	0	11.2244	0	0	0	0	middle
166	159	PC-5p-101957_12	CTGCCACTGTGGGTACGTACC	21	contig_1471328	-	1926	1987	CTGCCACTGTGGGTACGTACCcagtacgtaacagtacttggtacgtttccaggttggtatga	0						5'	New	gp4	.(((((((.(((..(((((((.(((((......))))).)))))))..)))))).))))...	58	50	-28.7	0.9	0	7	5	0	9	0	0	6.0439	5.86269	0	11.4195	0	middle
167	160	PC-5p-66990_25	CTGCGGCGTCATCAAGATTCA	21	contig_2322700	-	307	434	gtcagtcaatggttgcagCTGCGGCGTCATCAAGATTCActcatcaatgcccttcactgtttggtattagggttttttctgtgtatgagagaatcttgatgatgctgcatctgcaataaatggctaaa	0						5'	New	gp4	...(((((...(((((((.(((((((((((((((((((.(((((((..(((((..(((....)))...)))))........)).))))).))))))))))))))))))).)))))))...)))))...	122	42.2	-62.7	1.2	0	0	0	39	9	0	0	0	0	37.7744	11.4195	0	middle
168	161	PC-3p-43857_50	CTGTGCTCCTCTCTTCTCCT	20	contig_1140401	+	2618	2719	ttttttcagaaacatcaacagcagaagagagagagcacagcttctgcccttagcgactagaagCTGTGCTCCTCTCTTCTCGTgttggcttatctgaagttt	0						3'	New	gp4	...(((((((....((((((..(((((((((.(((((((((((((((.....))....))))))))))))))))))))))..))))))....)))))))...	96	45.1	-51.2	1.1	0	0	0	29	22	33	0	0	0	28.0886	27.9144	31.2323	middle

## Sheet: footnotes
Item	Description
Pre-miRNA Index	Pre-miRNA Cluster Index
miRNA_Index	mature miRNA
miR_name	The miR_name is composed of the 1st known miR name in a cluster, a underscore, and a matching annotation: such as
	L-n means the miRNA_seq (detected) is n base less than known rep_miRSeq in the left side;
	R-n means the miRNA_seq (detected) is n base less than known rep_miRSeq in the right side;
	L+n means the miRNA_seq (detected) is n base more than known rep_miRSeq in the left side;
	R+n means the miRNA_seq (detected) is n base more than known rep_miRSeq in the right side;
	2ss5TC13TA means 2 substitution (ss), which are T->C at position 5 and T->A at position 13
	if there is no matching annotation, the miRNA_seq (detected) is exactly same as known rep_miRSeq.
	New discovered 5p/3p sequence has been annotated as p3/p5: which is directly differentiate with the reported sequences,
miR_seq	is a read at 5' or 3' of maximum mapped score in each cluster.
len	miR_seq length
genome ID	Reference Genome Information
strand	strand "+" or "-"
start	pre-miRNA start position
end	Pre-miRNA end position
pre-miRNA_seq	pre-miRNA sequence
#mir/MIR	mapped mir numbers in miRbase, the number in this item eaquals to the sum of mirIDs
mirIDs	is all mirID in a cluster, seprated by ,
rep_mirID	is the representative known mirID
rep_mirSeq	is the representative known mir sequence
rep_miRID	is the representative known miRID
rep_miRSeq	is the representative known miR sequence
type	is 5' or 3', which means the cluster appears at 5' or 3' end
Sequence in miRbase	New, miRNA identified in this study and not reported in miRBase,mainly for new reported 5p or 3p sequence; Diff, confirming miRNA sequences in miRBase, but different sequences are reported in our study; and Yes, confirming miRNA sequences in miRBase.
	gp2a:Reads were mapped to miRNAs/pre-miRNAs of selected species in miRbase and the mapped pre-miRNAs were not further mapped to genome, but the reads (and of course the miRNAs of the pre-miRNAs) were mapped to genome. The extended genome sequences from the genome loci may form hairpins.
	gp2b:Reads were mapped to miRNAs/pre-miRNAs of selected species in miRbase and the mapped pre-miRNAs were not further mapped to genome, but the reads (and of course the miRNAs of the pre-miRNAs) were mapped to genome. The extended genome sequences from the genome loci may not form hairpins.
	gp1:Reads were mapped to miRNAs/pre-miRNAs of specific species in miRbase and the pre-miRNAs were further mapped to genome & EST.
	gp3:Reads were mapped to miRNAs/pre-miRNAs of selected species in miRbase and the mapped pre-miRNAs were not further mapped to genome, and the reads were not mapped to genome, either. but the reads were mapped to the miRNAS(Matures)
	gp4:Reads were not mapped to pre-miRNAs of selected species in miRbase. But the reads were mapped to genome & the extended genome sequences from genome may form hairpins.
SS	Secondary Structure
	Criteria:
	1.number of nucleotides in one bulge in stem : <= 12
	2.number of base pairs in the stem region of the predicted hairpin : >= 16
	3.cutoff of free energy : kCal/mol <= -15
	4.length of hairpin : up and down stems + terminal loop >= 50
	5.length of hairpin loop : <= 200
	6.number of nucleotides in one bulge in mature region : <= 4
	7.number of biased errors in one bulge in mature region : <= 2
	8.number of biased bulges in mature region : <= 2
	9.number of errors in mature region : <= 4
	10.number of base pairs in the mature region of the predicted hairpin : >= 12
	11.percent of mature in stem : >= 80
hairpinLen	pre-miRNA length
CG%	GC Content
dG	Free energy
MFEI	MFEI = -dG*100/mirLen/CG%. Reference: Cell. Mol. Life Sci. 63 (2006) 246-254.
raw	Raw data; from #reads(all),is the number of reads for isoform at 5' or 3' end.
norm	Normalized data
Expression Level	High:The number of reads in the following reported miRNAs is higher than the average copy of the data set.Medium:The number of reads in the following reported miRNAs is higher than 10 and less than average copy of the data set.Low:The number of reads in the following reported miRNAs is less than 10
